# Supplementary material for: Global Proteome Changes in the Rat Diaphragm Induced by Endurance Exercise Training
Source: PLoS One. 2017 Jan 30;12(1):e0171007. doi: 10.1371/journal.pone.0171007 (PMC5279855; doi:10.1371/journal.pone.0171007)
Supplement: S1 Table — Permanent DOI: https://figshare.com/articles/JGB_Progensis_QIP_Diaphragm_analysis_xlsx/4272818/1. (XLSX) [file pone.0171007.s001.xlsx]

## Sheet: JGB Mitochondria export 03-10-2
									Normalized abundance																Raw abundance																Spectral counts
									Control								Exercise								Control								Exercise								Control								Exercise
Accession	Peptide count	Peptides used for quantitation	Confidence score	Anova (p)	Max fold change	Highest mean condition	Lowest mean condition	Description	C1_mito	C2_mito_140925053842	C3_mito	C4_mito	C5_mito	C6_mito	C7_mito	C8_mito	E1_mito	E2_mito	E3_mito	E5_mito	E6_mito	E7_mito	E9_mito	E10_mito	C1_mito	C2_mito_140925053842	C3_mito	C4_mito	C5_mito	C6_mito	C7_mito	C8_mito	E1_mito	E2_mito	E3_mito	E5_mito	E6_mito	E7_mito	E9_mito	E10_mito	C1_mito	C2_mito_140925053842	C3_mito	C4_mito	C5_mito	C6_mito	C7_mito	C8_mito	E1_mito
Q6IMF3;F1M7F4	6	3	369.9	0.000253408	2.89171	Control	Exercise	Keratin, type II cytoskeletal 1 OS=Rattus norvegicus GN=Krt1 PE=2 SV=1	8.1658e+06	2.58194e+07	9.00604e+06	2.13994e+07	2.77241e+07	1.02154e+07	1.10043e+07	1.25143e+07	7.62932e+06	4.11127e+06	4.24583e+06	5.53811e+06	4.83048e+06	7.70273e+06	6.26101e+06	3.20182e+06	9.00265e+06	2.26623e+07	7.4912e+06	1.9046e+07	2.38929e+07	7.67453e+06	1.10967e+07	1.02652e+07	6.34144e+06	3.54709e+06	3.63409e+06	6.05565e+06	4.83048e+06	9.18485e+06	6.41245e+06	3.11581e+06	2	2	2	2	2	1	2	1	2
Q4FZU2;F1M0B2	6	1	328.02	0.000588869	3.48278	Control	Exercise	Keratin, type II cytoskeletal 6A OS=Rattus norvegicus GN=Krt6a PE=1 SV=1	1.15511e+06	6.71601e+06	1.59134e+06	3.5269e+06	2.76691e+06	1.30939e+06	2.00312e+06	3.13401e+06	1.95409e+06	473399	847886	499961	631158	1.05477e+06	410650	503092	1.27349e+06	5.89481e+06	1.32367e+06	3.13902e+06	2.38456e+06	983712	2.01995e+06	2.57074e+06	1.62423e+06	408436	725724	546682	631158	1.25773e+06	420583	489577	1	1	1	1	1	1	1	1	1
F1LZT6	1	1	36.93	0.000776229	2.31173	Control	Exercise	Protein Asap2 (Fragment) OS=Rattus norvegicus GN=Asap2 PE=4 SV=1	622011	1.58982e+06	754640	884225	1.17645e+06	455970	705862	1.05527e+06	501351	384086	274896	387226	267676	622777	499707	195973	685756	1.39542e+06	627708	786981	1.01388e+06	342558	711793	865610	416720	331379	235289	423413	267676	742609	511794	190708	0	1	0	1	1	1	1	1	0
P04166	2	2	124.6	0.00108338	1.28309	Control	Exercise	Cytochrome b5 type B OS=Rattus norvegicus GN=Cyb5b PE=1 SV=2	6.90655e+06	9.49105e+06	8.28976e+06	7.44858e+06	8.29013e+06	7.77768e+06	7.06798e+06	7.68497e+06	6.11682e+06	7.71706e+06	5.7035e+06	5.86063e+06	5.37705e+06	7.01445e+06	6.32653e+06	4.95045e+06	7.61434e+06	8.33053e+06	6.8954e+06	6.62941e+06	7.14453e+06	5.84316e+06	7.12736e+06	6.30377e+06	5.08426e+06	6.65808e+06	4.88175e+06	6.4083e+06	5.37705e+06	8.36414e+06	6.47956e+06	4.81746e+06	1	1	2	2	1	2	2	2	1
F1M9V7	1	1	35.01	0.00177938	1.36762	Exercise	Control	Protein Npepps OS=Rattus norvegicus GN=Npepps PE=4 SV=1	76977.4	68885.6	87794.6	101702	85639.3	103527	106930	116477	131379	128693	163665	113904	141443	126734	99245.4	117823	84866.2	60462.6	73027.3	90517	73804.9	77777.1	107829	95543	109201	111033	140084	124548	141443	151119	101646	114658	0	0	0	0	0	0	0	0	0
D3ZBV7;D3Z8Q3;Q6IFW8	8	6	493.5	0.00450459	1.82971	Control	Exercise	Keratin, type I cytoskeletal 10 OS=Rattus norvegicus GN=Krt10 PE=3 SV=1	6.35925e+06	1.51842e+07	8.67461e+06	4.49193e+06	1.05096e+07	6.4648e+06	8.8746e+06	1.15962e+07	4.61917e+06	5.7205e+06	5.0432e+06	4.49866e+06	4.2948e+06	6.97148e+06	5.63053e+06	2.65699e+06	7.01096e+06	1.33276e+07	7.21552e+06	3.99792e+06	9.0573e+06	4.85684e+06	8.94916e+06	9.51201e+06	3.83943e+06	4.93549e+06	4.31659e+06	4.91906e+06	4.2948e+06	8.31291e+06	5.76672e+06	2.58562e+06	3	5	4	4	4	4	4	5	1
B4F7A1;F1M3Z9	2	2	271.52	0.00496468	1.19085	Exercise	Control	LYR motif-containing protein 7 OS=Rattus norvegicus GN=Lyrm7 PE=3 SV=1	1.79474e+06	1.61909e+06	1.68069e+06	1.50221e+06	1.41713e+06	1.75082e+06	1.48981e+06	1.84243e+06	1.60348e+06	2.26883e+06	1.96764e+06	1.8397e+06	1.89085e+06	2.10616e+06	2.13314e+06	1.78667e+06	1.97867e+06	1.42112e+06	1.39799e+06	1.337e+06	1.2213e+06	1.31535e+06	1.50233e+06	1.5113e+06	1.3328e+06	1.95749e+06	1.68414e+06	2.01162e+06	1.89085e+06	2.51142e+06	2.18474e+06	1.73867e+06	2	2	2	1	2	2	2	1	2
D3ZCV0	70	45	6801.58	0.00529549	1.52946	Control	Exercise	Protein Actn2 OS=Rattus norvegicus GN=Actn2 PE=4 SV=1	1.88977e+09	1.94383e+09	2.01557e+09	2.20749e+09	3.3608e+09	2.66083e+09	1.82221e+09	1.33841e+09	1.80779e+09	1.11527e+09	1.08418e+09	1.86843e+09	1.61165e+09	1.09696e+09	1.21581e+09	1.47114e+09	2.08344e+09	1.70615e+09	1.67655e+09	1.96472e+09	2.89638e+09	1.99901e+09	1.83752e+09	1.09786e+09	1.50262e+09	9.62226e+08	9.27977e+08	2.04303e+09	1.61165e+09	1.30804e+09	1.24522e+09	1.43162e+09	82	74	81	81	93	82	78	64	73
F1M1I9	2	2	75.13	0.00558141	1.59775	Control	Exercise	Protein Neb (Fragment) OS=Rattus norvegicus GN=Neb PE=4 SV=1	267828	349439	316457	435557	501470	510812	216249	325548	263002	317041	246755	240548	248497	143140	173481	197214	295276	306712	263228	387656	432173	383760	218066	267038	218605	273535	211203	263028	248497	170682	177677	191916	1	1	0	1	0	0	1	0	1
P97576	5	5	272.23	0.00675154	1.21858	Exercise	Control	GrpE protein homolog 1, mitochondrial OS=Rattus norvegicus GN=Grpel1 PE=1 SV=2	4.51122e+06	4.0894e+06	4.41921e+06	3.67299e+06	3.91181e+06	4.35818e+06	4.77841e+06	5.39053e+06	5.18418e+06	6.04114e+06	5.45596e+06	4.01251e+06	5.31236e+06	5.54822e+06	5.20444e+06	6.05205e+06	4.97354e+06	3.58937e+06	3.67589e+06	3.26905e+06	3.37124e+06	3.27418e+06	4.81856e+06	4.4217e+06	4.30906e+06	5.21213e+06	4.66988e+06	4.38748e+06	5.31236e+06	6.61578e+06	5.33033e+06	5.88947e+06	4	3	3	4	2	4	4	3	4
D3ZPF3;D3Z8M9;Q5XI32	5	5	361.37	0.00724146	1.53408	Control	Exercise	Capping protein (Actin filament) muscle Z-line, beta, isoform CRA_b OS=Rattus norvegicus GN=Capzb PE=4 SV=1	5.64448e+06	5.89506e+06	7.06827e+06	6.39072e+06	9.06972e+06	5.75444e+06	5.11702e+06	3.46229e+06	5.46089e+06	2.54845e+06	3.28788e+06	5.12696e+06	4.55165e+06	3.16548e+06	3.20509e+06	4.20475e+06	6.22294e+06	5.17425e+06	5.87936e+06	5.68789e+06	7.81639e+06	4.32316e+06	5.16001e+06	2.84002e+06	4.53906e+06	2.19873e+06	2.81417e+06	5.60607e+06	4.55165e+06	3.77457e+06	3.28261e+06	4.09179e+06	4	3	5	4	4	3	3	2	3
P68136;D3ZRN3;D4A5S4;F1LTQ2	27	5	2666.61	0.00782813	1.5912	Control	Exercise	Actin, alpha skeletal muscle OS=Rattus norvegicus GN=Acta1 PE=1 SV=1	4.15078e+08	4.26144e+08	4.44451e+08	4.51625e+08	7.91767e+08	5.74194e+08	4.08551e+08	3.12472e+08	3.06438e+08	1.5077e+08	2.93094e+08	4.53764e+08	3.64093e+08	2.1499e+08	2.88586e+08	3.31656e+08	4.57616e+08	3.74037e+08	3.69693e+08	4.01957e+08	6.82354e+08	4.31377e+08	4.11983e+08	2.56312e+08	2.54709e+08	1.3008e+08	2.50866e+08	4.96168e+08	3.64093e+08	2.56357e+08	2.95566e+08	3.22746e+08	7	9	7	9	10	9	8	8	8
D3Z8T2	1	1	38.59	0.0097446	1.18883	Control	Exercise	Protein Mrps36 OS=Rattus norvegicus GN=Mrps36 PE=4 SV=1	492228	363203	484632	415886	450480	452925	432950	530969	343400	449010	381252	347256	342819	415699	429532	338805	542672	318792	403116	370148	388228	340271	436588	435539	285432	387394	326321	379707	342819	495686	439921	329704	0	0	0	0	0	1	0	0	0
Q3T1K5;B2GUZ5	5	5	365.37	0.00994249	1.48979	Control	Exercise	F-actin-capping protein subunit alpha-2 OS=Rattus norvegicus GN=Capza2 PE=1 SV=1	7.4257e+06	8.18929e+06	8.9687e+06	7.30753e+06	1.29946e+07	7.83018e+06	7.38661e+06	4.87298e+06	7.53265e+06	3.63611e+06	3.99801e+06	6.8928e+06	6.44022e+06	4.66267e+06	4.99579e+06	5.45559e+06	8.18669e+06	7.18794e+06	7.46014e+06	6.50387e+06	1.11989e+07	5.88261e+06	7.44867e+06	3.99717e+06	6.26109e+06	3.13714e+06	3.42198e+06	7.53693e+06	6.44022e+06	5.55984e+06	5.11663e+06	5.30904e+06	4	5	4	4	5	5	4	3	4
G3V8V6	5	5	523.27	0.0113394	1.15928	Control	Exercise	LRP16 protein OS=Rattus norvegicus GN=Macrod1 PE=4 SV=1	2.97499e+07	3.56354e+07	3.35002e+07	2.49745e+07	3.16725e+07	2.96771e+07	2.7117e+07	3.06011e+07	2.5108e+07	2.56649e+07	2.27354e+07	2.77349e+07	2.80916e+07	2.96458e+07	2.619e+07	2.43793e+07	3.27988e+07	3.12781e+07	2.78654e+07	2.22279e+07	2.72957e+07	2.22956e+07	2.73448e+07	2.51013e+07	2.08696e+07	2.2143e+07	1.94597e+07	3.03267e+07	2.80916e+07	3.53501e+07	2.68235e+07	2.37244e+07	7	6	8	6	7	7	6	7	6
P58775;F1LP83;F1LRB1;F1M0S3	28	11	1900.39	0.0118726	2.0619	Control	Exercise	Tropomyosin beta chain OS=Rattus norvegicus GN=Tpm2 PE=2 SV=1	3.62571e+08	4.01712e+08	2.51976e+08	2.56701e+08	4.3875e+08	2.1398e+08	1.54628e+08	8.82767e+07	2.02499e+08	1.19873e+08	5.93051e+07	1.80557e+08	1.17201e+08	1.42223e+08	9.70705e+07	1.33016e+08	3.99728e+08	3.52593e+08	2.09593e+08	2.28469e+08	3.7812e+08	1.60758e+08	1.55927e+08	7.24109e+07	1.68316e+08	1.03424e+08	5.07605e+07	1.9743e+08	1.17201e+08	1.69589e+08	9.94185e+07	1.29443e+08	11	11	8	6	10	8	6	6	8
Q6AY99;A2VD16;F1M4A6;G3V786	5	4	232.82	0.0124715	1.2533	Exercise	Control	Aldo-keto reductase family 1, member B10 (Aldose reductase) OS=Rattus norvegicus GN=Akr1b10 PE=2 SV=1	2.32969e+06	2.21997e+06	3.52295e+06	3.28871e+06	2.81189e+06	2.47345e+06	2.95451e+06	2.02879e+06	3.06477e+06	3.55227e+06	3.79422e+06	4.08054e+06	3.08282e+06	3.05388e+06	2.86517e+06	3.61526e+06	2.56844e+06	1.94852e+06	2.93038e+06	2.92703e+06	2.42332e+06	1.85824e+06	2.97934e+06	1.66416e+06	2.54742e+06	3.06481e+06	3.24755e+06	4.46187e+06	3.08282e+06	3.6415e+06	2.93447e+06	3.51814e+06	0	0	0	0	2	1	1	0	2
P68035;E9PU58;P62738;P63269	23	1	2084.05	0.0130904	2.27243	Control	Exercise	Actin, alpha cardiac muscle 1 OS=Rattus norvegicus GN=Actc1 PE=1 SV=1	678889	897081	683537	556818	368446	1.49289e+06	1.74211e+06	808760	551925	72499.2	303386	360382	481728	524785	596585	289674	748463	787391	568564	495581	317531	1.12157e+06	1.75674e+06	663403	458756	62550.4	259675	394060	481728	625762	611016	281892	0	0	0	0	0	1	1	0	0
Q6P6Q2;D3ZXB7;F1LRZ7;F1M1D0	9	2	508.72	0.0153506	2.58127	Control	Exercise	Keratin, type II cytoskeletal 5 OS=Rattus norvegicus GN=Krt5 PE=1 SV=1	141307	725893	206484	604747	1.32783e+06	269225	516086	424404	250272	202937	135745	213230	294285	205988	201019	129817	155788	637135	171753	538239	1.14434e+06	202261	520422	348127	208025	175089	116187	233156	294285	245623	205881	126329	0	0	0	0	2	0	0	0	0
D3ZSG3	2	2	128.25	0.0158513	2.17799	Control	Exercise	Protein Tmod4 OS=Rattus norvegicus GN=Tmod4 PE=4 SV=1	1.81862e+06	1.94669e+06	1.74575e+06	1.24477e+06	2.54988e+06	855648	880426	489595	1.2903e+06	751838	169416	1.07495e+06	460593	697930	355004	494466	2.005e+06	1.70866e+06	1.45211e+06	1.10787e+06	2.19752e+06	642826	887823	401601	1.07249e+06	648666	145007	1.17541e+06	460593	832223	363591	481182	2	0	1	1	2	0	0	0	0
P04692;G3V9I6;Q63607;Q923Z2	30	10	2194.02	0.0164803	2.01265	Control	Exercise	Tropomyosin alpha-1 chain OS=Rattus norvegicus GN=Tpm1 PE=1 SV=3	4.549e+08	4.40026e+08	3.25835e+08	2.97017e+08	5.19926e+08	2.25921e+08	1.89792e+08	1.00114e+08	2.57331e+08	1.44854e+08	7.42224e+07	2.38998e+08	1.31973e+08	1.65705e+08	1.11368e+08	1.44289e+08	5.01519e+08	3.86221e+08	2.71029e+08	2.64352e+08	4.48078e+08	1.69729e+08	1.91387e+08	8.21207e+07	2.13892e+08	1.24976e+08	6.35286e+07	2.61332e+08	1.31973e+08	1.97589e+08	1.14062e+08	1.40413e+08	11	9	10	8	12	10	10	7	11
D4ACB8	3	3	134.57	0.0184281	1.37896	Control	Exercise	Chaperonin subunit 8 (Theta) (Predicted), isoform CRA_a OS=Rattus norvegicus GN=Cct8 PE=3 SV=1	1.1057e+06	892403	1.34399e+06	1.02066e+06	1.26457e+06	791672	873146	586183	978408	848471	698514	746039	609974	610542	595439	625834	1.21902e+06	783284	1.11793e+06	908415	1.08982e+06	594763	880482	480830	813247	732038	597873	815756	609974	728020	609842	609022	0	0	0	0	2	0	0	0	2
P62632;D3ZC88;D4A0X4	4	4	204.38	0.0189504	1.47438	Control	Exercise	Elongation factor 1-alpha 2 OS=Rattus norvegicus GN=Eef1a2 PE=2 SV=1	4.74449e+06	6.09595e+06	4.1431e+06	3.98462e+06	6.55736e+06	2.79428e+06	3.2387e+06	2.75671e+06	4.24608e+06	2.70943e+06	3.11337e+06	2.8983e+06	2.47273e+06	2.2188e+06	2.70279e+06	2.9129e+06	5.23072e+06	5.35057e+06	3.44622e+06	3.54641e+06	5.65121e+06	2.09927e+06	3.26591e+06	2.26125e+06	3.52932e+06	2.33763e+06	2.6648e+06	3.16915e+06	2.47273e+06	2.64574e+06	2.76817e+06	2.83464e+06	3	3	3	3	4	3	3	2	3
P23928	1	1	46.43	0.0190133	1.81299	Control	Exercise	Alpha-crystallin B chain OS=Rattus norvegicus GN=Cryab PE=1 SV=1	225438	207843	308891	225872	232565	205198	128362	58237.7	114634	105130	88324.4	151678	92750.4	100509	92621.3	132687	248541	182429	256934	201031	200428	154160	129441	47770.8	95282.9	90703.4	75598.8	165852	92750.4	119848	94861.6	129122	1	0	0	0	0	0	0	0	0
Q4V8B7	2	2	100.95	0.0195584	1.24251	Exercise	Control	Inactive hydroxysteroid dehydrogenase-like protein 1 OS=Rattus norvegicus GN=Hsdl1 PE=2 SV=1	553684	687790	461248	551721	645044	471098	479178	419885	898108	633095	710728	517845	686486	593715	615559	649562	610427	603691	383665	491045	555906	353923	483204	344420	746502	546218	608328	566237	686486	707955	630449	632113	1	0	1	0	0	0	0	2	1
Q6P7A4	4	4	219.9	0.0196214	1.18543	Exercise	Control	Prosaposin OS=Rattus norvegicus GN=Psap PE=2 SV=1	1.49839e+06	2.07531e+06	1.6686e+06	1.73132e+06	1.58784e+06	1.47998e+06	1.84183e+06	1.66853e+06	2.14116e+06	2.40123e+06	2.18023e+06	1.72034e+06	1.75771e+06	2.19056e+06	1.61736e+06	2.05614e+06	1.65195e+06	1.82155e+06	1.38794e+06	1.54092e+06	1.36842e+06	1.11187e+06	1.8573e+06	1.36865e+06	1.77972e+06	2.07171e+06	1.8661e+06	1.88111e+06	1.75771e+06	2.61206e+06	1.65648e+06	2.0009e+06	1	3	3	1	2	0	3	2	2
D4AEL3	1	1	76.15	0.0251874	1.26405	Exercise	Control	Protein RGD1309148 OS=Rattus norvegicus GN=RGD1309148 PE=4 SV=1	440649	605465	630284	446952	506430	541191	458568	509329	767341	812808	820834	517968	554957	559924	706971	490927	485808	531432	524268	397798	436447	406582	462421	417789	637809	701269	702569	566371	554957	667662	724071	477739	1	1	1	0	1	1	1	1	0
P97532	11	11	734.46	0.0264622	1.15799	Exercise	Control	3-mercaptopyruvate sulfurtransferase OS=Rattus norvegicus GN=Mpst PE=1 SV=3	5.75694e+07	5.35356e+07	5.70081e+07	4.88983e+07	5.22791e+07	5.54765e+07	5.79169e+07	5.60011e+07	5.5703e+07	7.75274e+07	6.21548e+07	5.19049e+07	6.75793e+07	7.17565e+07	6.80688e+07	5.32998e+07	6.34692e+07	4.69895e+07	4.74192e+07	4.35206e+07	4.50547e+07	4.16781e+07	5.84035e+07	4.59362e+07	4.63e+07	6.68886e+07	5.31997e+07	5.67554e+07	6.75793e+07	8.55636e+07	6.97153e+07	5.1868e+07	9	9	9	11	8	9	9	13	9
F1MAL6;Q6S3A1	2	1	117.44	0.0268819	1.58145	Control	Exercise	Uncharacterized protein OS=Rattus norvegicus GN=Plec PE=4 SV=1	406608	477758	341543	327027	615546	473121	368391	206486	522304	154372	113505	375322	282682	230866	139248	215579	448278	419340	284094	291062	530485	355443	371487	169375	434136	133188	97151.8	410396	282682	275288	142616	209788	1	0	0	1	0	1	1	0	1
G3V778;O54937	4	3	209.75	0.0281119	1.41076	Exercise	Control	Pyruvate dehydrogenase kinase, isoenzyme 4 OS=Rattus norvegicus GN=Pdk4 PE=4 SV=1	2.85285e+06	5.00067e+06	2.46513e+06	2.10111e+06	3.43143e+06	2.01434e+06	2.83698e+06	5.50335e+06	2.62874e+06	5.19313e+06	5.27477e+06	4.18256e+06	5.41751e+06	5.06012e+06	5.08904e+06	4.12425e+06	3.14522e+06	4.38921e+06	2.05049e+06	1.87004e+06	2.95725e+06	1.51332e+06	2.86082e+06	4.51425e+06	2.18499e+06	4.48049e+06	4.51479e+06	4.57342e+06	5.41751e+06	6.03377e+06	5.21213e+06	4.01346e+06	2	2	3	1	2	2	2	2	2
P56499;P56500	2	2	151.24	0.0281314	1.45399	Exercise	Control	Mitochondrial uncoupling protein 3 OS=Rattus norvegicus GN=Ucp3 PE=2 SV=1	252828	349131	184504	183028	197746	304647	366739	431213	231337	678664	387399	395211	379056	371736	438158	418748	278738	306441	153470	162900	170420	228873	369821	353712	192286	585533	331583	432144	379056	443264	448757	407499	0	1	0	0	0	0	1	1	0
A1L108	1	1	59.93	0.0286258	1.64057	Control	Exercise	Actin-related protein 2/3 complex subunit 5-like protein OS=Rattus norvegicus GN=Arpc5l PE=1 SV=2	88755.3	66062.2	76626.9	87664.3	82133.9	45738.4	46313.5	54494.8	86723.4	12348	64689	41538.3	24572.8	12913.8	45584.9	45532.4	97851.1	57984.4	63738	78023.3	70784	34362.1	46702.6	44700.5	72084	10653.5	55368.7	45420	24572.8	15398.6	46687.5	44309.2	0	0	0	1	0	0	0	0	0
Q6P502	1	1	49.12	0.0292414	1.45541	Control	Exercise	T-complex protein 1 subunit gamma OS=Rattus norvegicus GN=Cct3 PE=1 SV=1	143999	127367	191404	165201	162978	140796	158696	60916.6	114372	116285	125950	81643.6	77808.9	95826.3	105363	73839.6	158756	111793	159209	147033	140456	105776	160029	49968.2	95065.7	100328	107804	89273.2	77808.9	114265	107912	71856	0	0	0	0	1	0	0	0	0
Q925F0	1	1	76.04	0.0327125	1.31222	Exercise	Control	Small muscular protein OS=Rattus norvegicus GN=Smpx PE=2 SV=1	169462	185590	230830	108188	202311	169510	195515	181538	147228	258515	245683	253369	244747	293910	179342	270658	186829	162897	192004	96290.3	174354	127348	197158	148910	122375	223040	210286	277047	244747	350463	183680	263387	0	0	1	0	0	0	0	0	0
D3ZDK6	6	2	365.68	0.0349683	1.62515	Control	Exercise	Keratin, type II cytoskeletal 2 epidermal OS=Rattus norvegicus GN=Krt2 PE=3 SV=1	653512	1.58151e+06	897937	444109	897642	793751	733490	1.50784e+06	394956	763630	448970	490262	388079	997986	810692	326418	720485	1.38813e+06	746901	395268	773598	596324	739653	1.23684e+06	328285	658840	384283	536077	388079	1.19001e+06	830301	317649	1	2	1	0	2	1	1	0	0
B0BN52;D3ZNM9;F1M3F5	9	9	673.43	0.035946	1.11775	Exercise	Control	Mitochondrial carrier homolog 2 (C. elegans) OS=Rattus norvegicus GN=Mtch2 PE=2 SV=1	5.63743e+07	5.74178e+07	5.00947e+07	4.72982e+07	4.85743e+07	5.40324e+07	5.33214e+07	5.42785e+07	5.55639e+07	7.1038e+07	5.78271e+07	5.20505e+07	5.4123e+07	6.76785e+07	5.83229e+07	5.44081e+07	6.21516e+07	5.0397e+07	4.16686e+07	4.20965e+07	4.18619e+07	4.05931e+07	5.37694e+07	4.45231e+07	4.61844e+07	6.12897e+07	4.94955e+07	5.69146e+07	5.4123e+07	8.07009e+07	5.97336e+07	5.29465e+07	13	14	9	8	5	9	6	8	11
P85972;F1LUU3	4	3	151.73	0.0372846	1.67941	Control	Exercise	Vinculin OS=Rattus norvegicus GN=Vcl PE=1 SV=1	890016	831776	987033	720986	2.42092e+06	2.0597e+06	1.45917e+06	1.21859e+06	1.04597e+06	287940	697462	1.09346e+06	868740	692560	678173	940431	981227	730071	821012	641695	2.08638e+06	1.5474e+06	1.47143e+06	999573	869404	248427	596973	1.19564e+06	868740	825819	694577	915168	0	0	0	0	0	2	0	0	0
F1LRP1;B0LPN4;F1LMY4;F1LPJ2	29	29	1736	0.0382801	1.19326	Exercise	Control	Uncharacterized protein OS=Rattus norvegicus GN=Ryr1l PE=4 SV=1	1.82867e+07	1.5446e+07	1.99695e+07	2.14575e+07	1.71503e+07	1.4065e+07	2.43961e+07	1.2924e+07	2.12833e+07	2.21003e+07	2.38579e+07	2.27357e+07	2.26277e+07	2.22744e+07	1.8596e+07	1.79896e+07	2.01607e+07	1.35573e+07	1.66105e+07	1.90977e+07	1.47803e+07	1.05667e+07	2.46011e+07	1.06012e+07	1.76905e+07	1.90676e+07	2.04205e+07	2.48603e+07	2.26277e+07	2.65603e+07	1.90459e+07	1.75063e+07	11	7	11	16	12	7	16	5	13
F1LRG5	2	2	92.64	0.0407199	1.49448	Exercise	Control	Galectin-1 OS=Rattus norvegicus GN=Lgals1 PE=4 SV=1	185135	251695	219911	224356	276948	92718.9	161492	98966	306489	257080	217146	316321	217722	285043	164149	494538	204108	220919	182922	199682	238677	69657.2	162849	81179	254752	221802	185860	345881	217722	339890	168119	481253	1	1	1	0	1	0	0	0	2
P49432	13	13	1399.17	0.0409457	1.10264	Exercise	Control	Pyruvate dehydrogenase E1 component subunit beta, mitochondrial OS=Rattus norvegicus GN=Pdhb PE=1 SV=2	4.4479e+08	4.04274e+08	4.03285e+08	3.86352e+08	4.17675e+08	4.50176e+08	3.94304e+08	4.23711e+08	3.94255e+08	5.43716e+08	4.4193e+08	4.41116e+08	4.43826e+08	4.94332e+08	4.92775e+08	4.13858e+08	4.90373e+08	3.54841e+08	3.35451e+08	3.43862e+08	3.59957e+08	3.38206e+08	3.97617e+08	3.47558e+08	3.27702e+08	4.69104e+08	3.78257e+08	4.82338e+08	4.43826e+08	5.8945e+08	5.04694e+08	4.0274e+08	26	26	23	22	24	24	26	25	23
D4A5G8;Q06437	23	22	1722.78	0.0435865	1.13579	Exercise	Control	Uncharacterized protein OS=Rattus norvegicus GN=LOC685778 PE=4 SV=1	4.11441e+08	3.96681e+08	3.97496e+08	3.4203e+08	3.92665e+08	4.51856e+08	3.93163e+08	4.31497e+08	3.56215e+08	5.47439e+08	4.45426e+08	4.1796e+08	4.39102e+08	4.90321e+08	5.14404e+08	4.42782e+08	4.53606e+08	3.48177e+08	3.30636e+08	3.04415e+08	3.38404e+08	3.39468e+08	3.96466e+08	3.53945e+08	2.96084e+08	4.72316e+08	3.81249e+08	4.57018e+08	4.39102e+08	5.84667e+08	5.26846e+08	4.30887e+08	21	24	23	22	25	21	23	21	26
D4A8I1	4	4	192.18	0.0436762	1.09757	Exercise	Control	Saccharopine dehydrogenase-like oxidoreductase OS=Rattus norvegicus GN=Sccpdh PE=4 SV=1	2.46976e+06	2.11483e+06	2.06734e+06	2.1157e+06	2.36312e+06	2.47278e+06	2.20861e+06	2.17255e+06	2.22238e+06	2.73907e+06	2.81899e+06	2.32195e+06	2.38735e+06	2.62288e+06	2.22553e+06	2.40132e+06	2.72286e+06	1.85624e+06	1.71961e+06	1.88303e+06	2.03657e+06	1.85774e+06	2.22717e+06	1.78208e+06	1.84722e+06	2.3632e+06	2.41283e+06	2.53893e+06	2.38735e+06	3.12757e+06	2.27936e+06	2.33681e+06	0	0	0	0	2	1	1	2	1
Q5XIG9	4	4	218.65	0.0440614	1.18049	Exercise	Control	Mitochondrial protein 18 kDa OS=Rattus norvegicus GN=Mtfp1 PE=2 SV=1	6.29568e+06	5.03208e+06	5.29592e+06	4.54406e+06	4.70868e+06	7.05554e+06	5.82706e+06	5.84085e+06	7.90723e+06	7.37195e+06	6.02929e+06	5.5196e+06	6.17552e+06	7.39614e+06	7.01338e+06	5.23656e+06	6.94087e+06	4.41678e+06	4.40513e+06	4.04432e+06	4.05799e+06	5.30064e+06	5.87602e+06	4.79109e+06	6.57244e+06	6.36032e+06	5.1606e+06	6.0354e+06	6.17552e+06	8.81927e+06	7.18302e+06	5.09589e+06	3	3	3	3	4	3	3	2	3
Q6GMN8;F1M1N4	24	1	2149.91	0.0446397	1.27714	Control	Exercise	Actn1 protein OS=Rattus norvegicus GN=Actn1 PE=2 SV=1	3.47933e+06	3.97019e+06	3.74373e+06	3.44039e+06	4.32082e+06	3.16658e+06	3.54751e+06	2.11854e+06	3.63196e+06	1.75795e+06	2.67933e+06	3.07414e+06	3.01658e+06	2.12955e+06	2.33197e+06	3.13575e+06	3.8359e+06	3.48473e+06	3.11403e+06	3.06203e+06	3.72373e+06	2.37897e+06	3.57732e+06	1.73778e+06	3.01886e+06	1.51672e+06	2.2933e+06	3.36142e+06	3.01658e+06	2.53931e+06	2.38838e+06	3.05151e+06	1	1	1	1	1	1	1	1	1
Q8CG45	3	3	186.15	0.0449641	1.13623	Exercise	Control	Aflatoxin B1 aldehyde reductase member 2 OS=Rattus norvegicus GN=Akr7a2 PE=1 SV=2	960466	927561	982720	1.0675e+06	997227	945554	1.12157e+06	1.15906e+06	998983	1.41219e+06	1.224e+06	1.05233e+06	1.15037e+06	1.08594e+06	1.35745e+06	992236	1.0589e+06	814143	817424	950098	859422	710370	1.13099e+06	950742	830348	1.2184e+06	1.04765e+06	1.15067e+06	1.15037e+06	1.29489e+06	1.39029e+06	965580	1	0	1	1	1	2	1	3	1
P21571	7	7	562.04	0.0456451	1.11647	Exercise	Control	ATP synthase-coupling factor 6, mitochondrial OS=Rattus norvegicus GN=Atp5j PE=1 SV=1	1.72857e+08	1.7474e+08	1.55216e+08	1.45552e+08	1.53086e+08	1.79564e+08	1.45849e+08	2.05473e+08	1.80044e+08	2.0515e+08	1.89952e+08	1.77766e+08	1.66684e+08	1.95505e+08	2.05432e+08	1.66985e+08	1.90572e+08	1.53374e+08	1.29108e+08	1.29545e+08	1.31932e+08	1.34901e+08	1.47074e+08	1.68544e+08	1.49651e+08	1.76998e+08	1.62584e+08	1.94378e+08	1.66684e+08	2.33123e+08	2.10401e+08	1.62499e+08	7	7	8	5	7	5	3	7	6
P53987	1	1	47.27	0.0485876	1.33723	Control	Exercise	Monocarboxylate transporter 1 OS=Rattus norvegicus GN=Slc16a1 PE=1 SV=1	162052	160045	130785	135483	180542	197336	137084	102531	107567	153684	113028	107690	133958	156335	78948.1	50547.1	178659	140475	108786	120583	155593	148253	138236	84103.2	89409.1	132595	96742.7	117754	133958	186416	80857.7	49189.2	0	0	0	0	0	0	0	0	0
D3ZHA0;C0JPT7;D3ZD13	5	5	301.45	0.05075	1.42983	Control	Exercise	Protein Flnc OS=Rattus norvegicus GN=Flnc PE=4 SV=1	3.30155e+06	2.94585e+06	3.30181e+06	5.90203e+06	5.48409e+06	6.07017e+06	4.05173e+06	3.08907e+06	4.66639e+06	1.45739e+06	2.07315e+06	3.98631e+06	3.14421e+06	2.13625e+06	2.26196e+06	4.15572e+06	3.6399e+06	2.58565e+06	2.74643e+06	5.25294e+06	4.72625e+06	4.56036e+06	4.08577e+06	2.53388e+06	3.87867e+06	1.2574e+06	1.77445e+06	4.35883e+06	3.14421e+06	2.5473e+06	2.31667e+06	4.04409e+06	3	2	3	5	2	3	3	4	2
F1LR41	3	3	143.63	0.0514682	1.20968	Exercise	Control	Glucose-6-phosphatase OS=Rattus norvegicus GN=G6pc PE=4 SV=1	604003	657445	917909	839191	793754	912910	574144	851911	984651	860234	1.30086e+06	876025	790296	736907	913665	978416	665902	577056	763514	746899	684067	685845	578968	698799	818436	742187	1.11343e+06	957890	790296	878700	935765	952132	0	0	0	1	0	1	0	1	1
F2Z3T2;F1LRP5;F1M931	28	7	1656.22	0.0542801	1.76214	Control	Exercise	Tropomyosin alpha-3 chain OS=Rattus norvegicus GN=Tpm3 PE=3 SV=1	3.07543e+07	2.92049e+07	2.60467e+07	2.95129e+07	3.45718e+07	2.05858e+07	1.51184e+07	6.97347e+06	2.19234e+07	1.96985e+07	3.95223e+06	1.95295e+07	1.38368e+07	1.11596e+07	5.19396e+06	1.41002e+07	3.39061e+07	2.56339e+07	2.16656e+07	2.62671e+07	2.97944e+07	1.54655e+07	1.52454e+07	5.72014e+06	1.82226e+07	1.69954e+07	3.3828e+06	2.13546e+07	1.38368e+07	1.33069e+07	5.3196e+06	1.37214e+07	5	4	5	4	7	3	3	2	3
Q9EQP5	2	2	95.35	0.0551685	1.31471	Control	Exercise	Prolargin OS=Rattus norvegicus GN=Prelp PE=2 SV=1	424012	546020	493107	628878	808390	385639	466546	360113	406587	284338	577170	439969	388658	292975	305262	433264	467466	479255	410165	559716	696680	289721	470466	295391	337952	245319	494012	481084	388658	349349	312646	421625	1	0	2	0	1	0	1	0	0
Q9R1T1	1	1	69.24	0.0561295	1.52373	Control	Exercise	Barrier-to-autointegration factor OS=Rattus norvegicus GN=Banf1 PE=1 SV=1	1.02835e+06	2.01871e+06	2.28123e+06	1.7361e+06	3.36868e+06	2.83813e+06	1.44286e+06	1.49938e+06	1.60098e+06	555819	2.6755e+06	1.87685e+06	838873	814628	1.00673e+06	1.27128e+06	1.13373e+06	1.77187e+06	1.89752e+06	1.54517e+06	2.90317e+06	2.13221e+06	1.45498e+06	1.2299e+06	1.33073e+06	479546	2.29002e+06	2.05224e+06	838873	971376	1.03108e+06	1.23712e+06	0	1	0	1	1	1	0	1	1
B5DFN3	1	1	71.07	0.0588786	1.14141	Exercise	Control	Mitochondrial nucleoid factor 1 OS=Rattus norvegicus GN=Mnf1 PE=2 SV=1	1.0814e+06	1.08112e+06	837491	1.08875e+06	1.31322e+06	904076	852949	1.00824e+06	1.29459e+06	1.3464e+06	943017	1.13866e+06	1.23346e+06	1.14901e+06	1.15083e+06	1.06624e+06	1.19222e+06	948926	696623	969011	1.13174e+06	679208	860115	827035	1.07605e+06	1.16164e+06	807149	1.24507e+06	1.23346e+06	1.3701e+06	1.17866e+06	1.03759e+06	1	1	1	1	1	1	1	1	1
G3V6E1;D3ZSL8	124	22	11530.7	0.0591055	1.60282	Control	Exercise	Myosin-4 OS=Rattus norvegicus GN=Myh4 PE=4 SV=1	2.5429e+08	1.78037e+08	1.58282e+08	3.09854e+08	2.10421e+08	1.12284e+08	9.41023e+07	9.28434e+07	1.13643e+08	6.00113e+07	1.3178e+08	1.36225e+08	1.35281e+08	4.7383e+07	1.05416e+08	1.50029e+08	2.8035e+08	1.56268e+08	1.31658e+08	2.75778e+08	1.81343e+08	8.43559e+07	9.4893e+07	7.61569e+07	9.44594e+07	5.17761e+07	1.12794e+08	1.48955e+08	1.35281e+08	5.65002e+07	1.07966e+08	1.45999e+08	25	21	19	33	24	18	19	17	21
Q5XIM9	1	1	58.79	0.0632368	1.34794	Control	Exercise	T-complex protein 1 subunit beta OS=Rattus norvegicus GN=Cct2 PE=1 SV=3	188971	208390	281852	180840	230110	155492	246197	109791	205611	165702	113396	150828	91745.7	104539	211015	145382	208337	182909	234443	160952	198311	116817	248266	90058.6	170903	142964	97058.2	164923	91745.7	124654	216119	141477	1	0	0	0	0	0	0	0	1
G3V939	1	1	35.96	0.0654715	6.59617	Exercise	Control	Protein Krt82 OS=Rattus norvegicus GN=Krt82 PE=3 SV=1	95524.3	42956.1	31559.5	119648	37062.7	10950	81015.1	11950.2	110800	41418.5	41186.4	135028	2.24783e+06	81022.2	93554.4	89906.3	105314	37703.7	26251.1	106490	31941.1	8226.48	81695.7	9802.4	92096.5	35734.8	35252.3	147646	2.24783e+06	96612.2	95817.3	87491.1	0	0	0	0	0	0	0	0	0
Q6MG10	1	1	46.07	0.0669821	1.26231	Exercise	Control	Mitochondrial ribosomal protein S18B OS=Rattus norvegicus GN=Mrps18b PE=2 SV=1	85378.1	79434.6	60160.4	52012.4	73966.1	108130	65386.7	101687	78237.5	137660	77594.7	117596	74358	115033	97637.7	92283	94127.9	69721.7	50041.3	46292.3	63744.9	81235.1	65936.1	83410.8	65030.5	118769	66414.9	128586	74358	137167	99999.4	89803.9	0	0	0	0	0	0	1	1	0
D3ZIN5	11	11	650.32	0.0679557	1.13147	Exercise	Control	Protein RGD1308772 OS=Rattus norvegicus GN=RGD1308772 PE=4 SV=1	4.56307e+06	5.3909e+06	4.36503e+06	3.83223e+06	3.38667e+06	4.48355e+06	4.55185e+06	4.5733e+06	4.25936e+06	6.3218e+06	4.60489e+06	4.61362e+06	5.02633e+06	4.94598e+06	4.9482e+06	5.04707e+06	5.0307e+06	4.73173e+06	3.63082e+06	3.41078e+06	2.91867e+06	3.36837e+06	4.5901e+06	3.75135e+06	3.54036e+06	5.45428e+06	3.94142e+06	5.04476e+06	5.02633e+06	5.89767e+06	5.06789e+06	4.91148e+06	3	3	4	4	5	4	5	6	4
G3V6J0	6	6	403.71	0.0684562	1.09754	Exercise	Control	4-trimethylaminobutyraldehyde dehydrogenase OS=Rattus norvegicus GN=Aldh9a1 PE=3 SV=1	2.6054e+06	2.22849e+06	2.53793e+06	2.24538e+06	2.79807e+06	3.17572e+06	2.92297e+06	2.64536e+06	2.6124e+06	2.84009e+06	2.97067e+06	2.73536e+06	2.86828e+06	3.29237e+06	2.98138e+06	2.92271e+06	2.8724e+06	1.956e+06	2.11104e+06	1.99844e+06	2.41141e+06	2.38584e+06	2.94753e+06	2.16991e+06	2.17141e+06	2.45035e+06	2.54266e+06	2.99098e+06	2.86828e+06	3.92588e+06	3.05349e+06	2.8442e+06	3	3	4	2	2	3	4	3	3
P11030;F1LV02	2	2	107.33	0.0703272	1.13101	Control	Exercise	Acyl-CoA-binding protein OS=Rattus norvegicus GN=Dbi PE=1 SV=3	2.00391e+06	1.95928e+06	1.6446e+06	1.43886e+06	1.73233e+06	1.75015e+06	1.69991e+06	1.74745e+06	1.88318e+06	1.49743e+06	1.58405e+06	1.83097e+06	1.37104e+06	1.18313e+06	1.38365e+06	1.62411e+06	2.20928e+06	1.71971e+06	1.36798e+06	1.28062e+06	1.49295e+06	1.31484e+06	1.7142e+06	1.43338e+06	1.56529e+06	1.29194e+06	1.35582e+06	2.00208e+06	1.37104e+06	1.41078e+06	1.41712e+06	1.58048e+06	1	2	1	1	1	1	0	1	1
Q8SEZ1	1	1	81.83	0.0707201	1.09072	Exercise	Control	NADH-ubiquinone oxidoreductase chain 3 OS=Rattus norvegicus GN=Mt-nd3 PE=3 SV=1	1.51669e+07	1.60867e+07	1.4641e+07	1.48113e+07	1.66028e+07	1.91795e+07	1.38357e+07	1.47693e+07	1.61873e+07	1.80673e+07	1.7812e+07	1.63779e+07	1.55098e+07	1.77023e+07	1.92413e+07	1.55437e+07	1.67212e+07	1.41197e+07	1.21783e+07	1.31824e+07	1.43085e+07	1.4409e+07	1.3952e+07	1.21148e+07	1.34548e+07	1.5588e+07	1.52457e+07	1.79085e+07	1.55098e+07	2.11086e+07	1.97067e+07	1.51262e+07	1	2	2	2	1	2	2	2	2
F1LPX0	2	2	91.06	0.0755477	1.20014	Exercise	Control	Uncharacterized protein OS=Rattus norvegicus GN=Mipep PE=3 SV=1	798507	482420	542290	653423	494232	610190	453538	802273	608171	1.02429e+06	700291	614404	624832	728432	715508	788979	880340	423432	451075	581562	425935	458419	457348	658082	505508	883732	599394	671820	624832	868594	732815	767784	1	1	1	1	0	0	1	0	0
F1LPC1	2	2	212.88	0.0757076	2.3388	Control	Exercise	Troponin T, fast skeletal muscle OS=Rattus norvegicus GN=Tnnt3 PE=4 SV=1	5.14724e+07	3.3781e+07	2.26961e+07	1.68095e+07	4.49157e+07	8.38121e+06	1.46074e+07	3.84598e+06	2.3957e+07	7.71774e+06	2.77936e+06	1.39704e+07	8.6918e+06	1.24989e+07	5.09664e+06	9.30952e+06	5.67474e+07	2.96504e+07	1.88786e+07	1.49608e+07	3.87088e+07	6.29658e+06	1.47301e+07	3.15475e+06	1.99129e+07	6.65866e+06	2.37891e+06	1.5276e+07	8.6918e+06	1.49039e+07	5.21992e+06	9.05943e+06	12	10	8	6	10	3	2	2	6
D3ZF99	1	1	52.32	0.0759996	1.76486	Control	Exercise	Mitochondrial ribosomal protein L55 (Predicted), isoform CRA_a OS=Rattus norvegicus GN=Mrpl55 PE=4 SV=1	279323	179975	201602	404301	927537	590756	271646	644982	178607	242500	306188	279284	343691	176366	324955	131638	307949	157968	167692	359837	799363	443819	273929	529061	148457	209222	262073	305383	343691	210302	332815	128101	0	0	0	0	0	0	0	1	0
D4A3E8;F1LVT7	3	2	147	0.0775294	1.19336	Exercise	Control	Mitochondrial ribosomal protein S27 (Predicted), isoform CRA_b OS=Rattus norvegicus GN=Mrps27 PE=4 SV=1	1.52578e+06	1.49814e+06	1.18733e+06	1.09352e+06	1.01819e+06	1.49348e+06	1.44956e+06	1.68483e+06	2.07512e+06	1.80758e+06	1.21779e+06	1.30614e+06	1.50391e+06	1.89706e+06	1.76726e+06	1.49344e+06	1.68215e+06	1.31495e+06	987614	973262	877488	1.12201e+06	1.46174e+06	1.38202e+06	1.72482e+06	1.55953e+06	1.04233e+06	1.4282e+06	1.50391e+06	2.26208e+06	1.81001e+06	1.45332e+06	2	1	1	1	0	1	1	1	1
Q1HCL7	1	1	79.81	0.080142	1.31757	Exercise	Control	NAD kinase domain-containing protein 1 OS=Rattus norvegicus GN=Nadkd1 PE=2 SV=1	391263	323872	508153	327209	295124	582551	692253	783928	481190	914360	567445	396769	627230	643877	748587	764813	431360	284271	422680	291224	254341	437655	698070	643034	399962	788886	485688	433847	627230	767769	766694	744267	0	0	0	0	0	1	1	1	0
O35796	7	7	470.73	0.081484	1.12797	Exercise	Control	Complement component 1 Q subcomponent-binding protein, mitochondrial OS=Rattus norvegicus GN=C1qbp PE=1 SV=2	2.31764e+07	1.91311e+07	1.87276e+07	2.08997e+07	1.51981e+07	2.1866e+07	2.35044e+07	2.542e+07	2.23704e+07	2.59484e+07	2.10622e+07	2.14156e+07	2.27703e+07	2.78909e+07	2.54034e+07	2.25507e+07	2.55515e+07	1.67918e+07	1.55776e+07	1.86013e+07	1.30979e+07	1.64274e+07	2.37019e+07	2.08513e+07	1.85941e+07	2.23876e+07	1.80276e+07	2.34169e+07	2.27703e+07	3.32575e+07	2.60179e+07	2.19449e+07	5	4	4	3	4	4	3	4	4
D3ZL85	4	4	190.57	0.0861618	1.13665	Control	Exercise	Protein Hccs OS=Rattus norvegicus GN=Hccs PE=4 SV=1	1.43031e+06	1.6784e+06	1.21396e+06	1.15744e+06	1.39802e+06	1.2423e+06	1.24175e+06	1.41081e+06	1.12479e+06	1.65103e+06	1.17957e+06	1.12651e+06	996202	1.31826e+06	988005	1.09345e+06	1.57689e+06	1.47317e+06	1.00977e+06	1.03015e+06	1.20483e+06	933310	1.25218e+06	1.15725e+06	934916	1.42447e+06	1.00962e+06	1.23178e+06	996202	1.57192e+06	1.0119e+06	1.06408e+06	2	2	1	1	0	2	0	1	1
Q4G067	2	2	84.89	0.0868294	1.41155	Exercise	Control	Mitochondrial ribosomal protein L44 OS=Rattus norvegicus GN=Mrpl44 PE=2 SV=1	178431	275313	241391	187527	157421	185270	192329	259647	279144	428677	372949	109567	307175	341861	248976	279283	196717	241649	200789	166903	135667	139189	193945	212981	232023	369852	319215	119806	307175	407640	254999	271780	0	0	0	0	0	1	0	2	0
D3ZEH6	2	2	132.93	0.0881451	1.2721	Exercise	Control	Protein LOC683919 OS=Rattus norvegicus GN=LOC683919 PE=4 SV=1	608377	521718	354849	262045	410099	429070	581001	637526	505759	811001	465908	391751	655583	709565	613228	687146	670724	457925	295163	233227	353428	322349	585883	522945	420384	699711	398781	428360	655583	846097	628061	668687	1	1	0	0	0	0	1	1	0
F1M953;P48721	35	33	2877.85	0.0884992	1.10608	Exercise	Control	Stress-70 protein, mitochondrial OS=Rattus norvegicus GN=Hspa9 PE=3 SV=1	2.02999e+08	2.10654e+08	2.08267e+08	1.89625e+08	2.00267e+08	2.54939e+08	2.01663e+08	2.39917e+08	1.94362e+08	2.88481e+08	2.39541e+08	2.11511e+08	2.32581e+08	2.52457e+08	2.38449e+08	2.32164e+08	2.23803e+08	1.84897e+08	1.73236e+08	1.68771e+08	1.72592e+08	1.91529e+08	2.03357e+08	1.96797e+08	1.61552e+08	2.48894e+08	2.05029e+08	2.31277e+08	2.32581e+08	3.01033e+08	2.44217e+08	2.25928e+08	36	40	38	39	38	39	36	39	37
Q68G41	11	1	823.86	0.0892399	5.41783	Exercise	Control	Dodecenoyl-Coenzyme A delta isomerase (3,2 trans-enoyl-Coenzyme A isomerase) OS=Rattus norvegicus GN=Eci1 PE=2 SV=1	85216.5	83387.6	69646.1	68443.6	57543.6	85436.9	75002.8	94856.9	99565.5	84085.5	1.38706e+06	112129	83990.7	1.433e+06	80990.7	75716.5	93949.6	73191.4	57931.4	60916.4	49591.8	64186.5	75632.9	77808.5	82758.3	72546.8	1.18721e+06	122608	83990.7	1.70873e+06	82949.7	73682.5	0	0	0	0	0	0	0	0	0
G3V6H5;P97700	16	16	1092.14	0.0900992	1.09087	Control	Exercise	Mitochondrial 2-oxoglutarate/malate carrier protein OS=Rattus norvegicus GN=Slc25a11 PE=3 SV=1	1.58502e+08	1.48677e+08	1.40257e+08	1.36826e+08	1.53794e+08	1.757e+08	1.2923e+08	1.414e+08	1.36265e+08	1.66653e+08	1.35408e+08	1.26999e+08	1.2e+08	1.34601e+08	1.32476e+08	1.33327e+08	1.74746e+08	1.30497e+08	1.16666e+08	1.21779e+08	1.32541e+08	1.31999e+08	1.30316e+08	1.15986e+08	1.13262e+08	1.43784e+08	1.15899e+08	1.38867e+08	1.2e+08	1.605e+08	1.3568e+08	1.29746e+08	19	16	18	18	17	19	17	19	17
P81155;D4AD77;F1LQJ3	12	11	1011.7	0.0926446	1.09466	Exercise	Control	Voltage-dependent anion-selective channel protein 2 OS=Rattus norvegicus GN=Vdac2 PE=1 SV=2	1.41609e+08	1.50066e+08	1.37922e+08	1.28671e+08	1.30496e+08	1.66789e+08	1.39357e+08	1.69375e+08	1.54759e+08	1.78979e+08	1.56204e+08	1.31928e+08	1.58602e+08	1.78213e+08	1.65424e+08	1.50383e+08	1.56122e+08	1.31717e+08	1.14723e+08	1.1452e+08	1.12463e+08	1.25304e+08	1.40528e+08	1.38934e+08	1.28635e+08	1.54419e+08	1.33698e+08	1.44257e+08	1.58602e+08	2.12504e+08	1.69425e+08	1.46343e+08	11	12	9	10	13	14	13	12	11
F1LP60	1	1	55.09	0.0937239	1.1789	Control	Exercise	Uncharacterized protein (Fragment) OS=Rattus norvegicus GN=Msn PE=4 SV=1	711106	767945	745832	805351	960843	729624	575327	543039	829524	524917	705614	507684	607350	710484	491348	576054	783981	674045	620381	716781	828066	548147	580160	445440	689495	452884	603951	555127	607350	847193	503233	560579	1	1	1	1	1	1	1	1	1
G3V616	1	1	73.03	0.0943135	1.08834	Exercise	Control	Divalent cation tolerant protein CUTA, isoform CRA_b OS=Rattus norvegicus GN=Cuta PE=4 SV=1	615397	734859	738181	753354	690463	672566	567502	701518	724947	842163	837942	722139	713950	724332	756589	635325	678464	645005	614017	670503	595049	505281	572270	575436	602571	726596	717213	789622	713950	863704	774889	618258	1	1	1	0	1	0	1	1	0
B0BN30	1	1	46.63	0.0948991	1.46773	Exercise	Control	Mtch1 protein OS=Rattus norvegicus GN=Mtch1 PE=2 SV=1	21072.2	77065.2	89657.9	38369.7	43717.5	101685	108939	88466.3	80637.7	101876	60903.5	63197.1	145525	185315	90614.4	107028	23231.7	67642	74577.2	34149.9	37676.3	76393.6	109854	72566.4	67025.6	87895.9	52128.7	69102.9	145525	220973	92806.2	104153	0	0	0	0	0	0	1	0	0
D4A228	3	3	156.95	0.0960417	1.66152	Control	Exercise	Uncharacterized protein OS=Rattus norvegicus GN=Myom3 PE=4 SV=1	2.28982e+06	1.36852e+06	1.40418e+06	1.77167e+06	1.56887e+06	614521	1.15893e+06	390898	1.28682e+06	451996	817890	813203	953061	365501	712864	958771	2.52449e+06	1.20118e+06	1.16799e+06	1.57683e+06	1.35207e+06	461673	1.16867e+06	320643	1.06959e+06	389970	700050	889197	953061	435828	730107	933015	1	0	1	3	3	0	0	0	1
P08461	18	18	1508.62	0.100368	1.08574	Exercise	Control	Dihydrolipoyllysine-residue acetyltransferase component of pyruvate dehydrogenase complex, mitochondrial OS=Rattus norvegicus GN=Dlat PE=1 SV=3	3.05367e+08	3.11891e+08	2.9298e+08	2.73093e+08	2.63352e+08	3.10338e+08	2.68456e+08	3.14252e+08	2.85358e+08	3.84454e+08	3.37202e+08	2.78643e+08	3.0552e+08	3.21152e+08	3.32262e+08	2.95745e+08	3.36661e+08	2.73754e+08	2.437e+08	2.43059e+08	2.2696e+08	2.33149e+08	2.70712e+08	2.57773e+08	2.37188e+08	3.31697e+08	2.88618e+08	3.04682e+08	3.0552e+08	3.82947e+08	3.40299e+08	2.878e+08	23	23	23	23	21	20	20	25	24
Q4FZT0;D3ZB35	12	12	871.91	0.101418	1.12152	Exercise	Control	Stomatin-like protein 2 OS=Rattus norvegicus GN=Stoml2 PE=1 SV=1	7.51618e+06	8.09132e+06	5.96446e+06	7.01546e+06	5.62852e+06	7.26388e+06	8.13237e+06	6.83455e+06	7.42242e+06	8.49831e+06	9.25588e+06	6.99002e+06	6.55609e+06	7.33201e+06	9.32511e+06	7.9262e+06	8.28645e+06	7.10195e+06	4.96122e+06	6.24392e+06	4.85073e+06	5.45716e+06	8.2007e+06	5.60619e+06	6.16947e+06	7.33211e+06	7.92231e+06	7.64323e+06	6.55609e+06	8.7428e+06	9.55067e+06	7.71327e+06	9	6	6	6	7	6	7	7	6
D3ZYU4	2	2	159	0.101632	1.19597	Exercise	Control	Protein Fam36a OS=Rattus norvegicus GN=Fam36a PE=4 SV=1	3.01468e+06	2.77139e+06	3.11793e+06	2.61683e+06	2.05478e+06	3.07043e+06	3.51256e+06	3.2356e+06	3.90381e+06	4.01128e+06	3.95569e+06	2.24538e+06	2.88497e+06	3.85651e+06	2.98265e+06	4.13847e+06	3.32363e+06	2.43252e+06	2.59349e+06	2.32904e+06	1.77083e+06	2.30673e+06	3.54207e+06	2.65408e+06	3.24482e+06	3.46083e+06	3.38576e+06	2.45521e+06	2.88497e+06	4.59856e+06	3.05479e+06	4.02729e+06	2	2	2	1	1	1	2	1	1
P06761	4	3	362.44	0.109244	1.19864	Exercise	Control	78 kDa glucose-regulated protein OS=Rattus norvegicus GN=Hspa5 PE=1 SV=1	804166	656912	753945	1.20662e+06	877581	758915	985728	501179	768014	962529	1.43979e+06	958779	953386	962210	987327	813149	886579	576588	627130	1.07392e+06	756309	570153	994010	411103	638368	830444	1.23234e+06	1.04838e+06	953386	1.14735e+06	1.01121e+06	791305	3	1	2	2	3	2	2	1	1
D4AAX9	2	2	91.76	0.109533	1.13601	Exercise	Control	Probable UDP-sugar transporter protein SLC35A4 OS=Rattus norvegicus GN=Slc35a4 PE=4 SV=1	2.19869e+06	1.85922e+06	1.99404e+06	1.69925e+06	1.59199e+06	1.74705e+06	1.62031e+06	1.68686e+06	1.57608e+06	2.53188e+06	2.5073e+06	2.15606e+06	2.04299e+06	1.95963e+06	1.76048e+06	1.82121e+06	2.42402e+06	1.63189e+06	1.65864e+06	1.51237e+06	1.372e+06	1.31252e+06	1.63392e+06	1.38369e+06	1.31003e+06	2.18444e+06	2.14605e+06	2.35754e+06	2.04299e+06	2.3367e+06	1.80307e+06	1.77228e+06	0	0	0	0	0	1	0	0	0
P02770	28	28	2052.62	0.11059	1.17191	Control	Exercise	Serum albumin OS=Rattus norvegicus GN=Alb PE=1 SV=2	1.47397e+08	1.54072e+08	1.69423e+08	1.74115e+08	1.79407e+08	1.37527e+08	1.39487e+08	9.12996e+07	1.44144e+08	1.14892e+08	1.32023e+08	1.42156e+08	1.17408e+08	1.27203e+08	1.05919e+08	1.34022e+08	1.62503e+08	1.35233e+08	1.40925e+08	1.54967e+08	1.54615e+08	1.0332e+08	1.40659e+08	7.48905e+07	1.19812e+08	9.91256e+07	1.13001e+08	1.5544e+08	1.17408e+08	1.51679e+08	1.08481e+08	1.30422e+08	24	27	31	27	29	27	28	17	28
D4A1G1	1	1	71.66	0.111854	1.14963	Exercise	Control	Acylphosphatase OS=Rattus norvegicus GN=Acyp2 PE=3 SV=1	953272	836387	1.00993e+06	869545	970428	782131	855230	721839	888335	1.07884e+06	885724	1.41922e+06	773633	1.09874e+06	960143	941378	1.05096e+06	734118	840054	773915	836326	587594	862415	592104	738378	930792	758110	1.55185e+06	773633	1.31015e+06	983367	916089	1	1	1	1	1	1	1	1	1
D4A833	1	1	34.74	0.116266	1.47511	Exercise	Control	Mitochondrial ribosomal protein S30 (Predicted), isoform CRA_a OS=Rattus norvegicus GN=Mrps30 PE=4 SV=1	45330.4	7009.67	85616	44849.6	50703.2	130372	76301.8	140216	134610	66758.9	180301	93865.2	67712.6	79749.3	144175	88977.4	49976	6152.56	71215.1	39917.2	43696.6	97944.7	76942.9	115015	111887	57597.8	154323	102637	67712.6	95094.4	147662	86587.2	0	0	0	0	0	0	0	0	0
P0C089	4	4	269.25	0.118503	1.11576	Control	Exercise	Protein-tyrosine phosphatase mitochondrial 1 OS=Rattus norvegicus GN=Ptpmt1 PE=2 SV=1	1.98607e+06	1.93624e+06	1.85787e+06	1.61174e+06	2.20514e+06	2.41519e+06	2.15204e+06	2.51158e+06	1.8473e+06	2.09957e+06	1.56289e+06	1.66335e+06	1.81325e+06	1.86449e+06	2.07444e+06	2.02054e+06	2.1896e+06	1.69949e+06	1.54537e+06	1.43449e+06	1.90042e+06	1.81447e+06	2.17012e+06	2.06018e+06	1.53546e+06	1.81145e+06	1.33771e+06	1.81879e+06	1.81325e+06	2.22324e+06	2.12461e+06	1.96626e+06	3	3	4	3	2	2	3	3	3
P16257	1	1	35.9	0.120467	1.21079	Exercise	Control	Translocator protein OS=Rattus norvegicus GN=Tspo PE=1 SV=1	172158	216490	131603	153911	258558	303101	197548	275636	251037	370120	226478	190310	254725	246635	223141	306799	189801	190019	109467	136984	222828	227712	199207	226097	208660	319330	193848	208094	254725	294091	228539	298558	0	0	0	0	0	0	0	0	1
D4A2S4;F1M3S2	24	14	1528.7	0.120787	1.4342	Control	Exercise	Myosin-binding protein C, slow-type OS=Rattus norvegicus GN=Mybpc1 PE=4 SV=1	1.78456e+07	1.60296e+07	1.51338e+07	2.68503e+07	2.23467e+07	1.09543e+07	9.71375e+06	7.01548e+06	1.32066e+07	7.16465e+06	1.2542e+07	1.23006e+07	1.25599e+07	6.20112e+06	1.05721e+07	1.323e+07	1.96744e+07	1.40696e+07	1.25882e+07	2.38974e+07	1.92587e+07	8.22965e+06	9.79536e+06	5.7546e+06	1.09772e+07	6.18147e+06	1.0735e+07	1.34501e+07	1.25599e+07	7.39431e+06	1.08278e+07	1.28746e+07	10	8	5	12	7	6	6	4	8
D4A2K1	1	1	52.85	0.121543	28.5344	Control	Exercise	Protein Dhdpsl OS=Rattus norvegicus GN=Hoga1 PE=4 SV=1	10769	31776.6	2005.78	6971.66	8744.56	720.276	544981	1085.58	4722.06	1914.15	3777.77	4735.21	877.063	970.986	1328.77	2948.45	11872.6	27891.1	1668.4	6204.94	7536.16	541.124	549560	890.468	3924.95	1651.48	3233.47	5177.71	877.063	1157.82	1360.91	2869.24	0	0	0	0	0	0	1	0	0
F1LQ28;D4A8Z2;Q1XIH4;Q5BKE5	8	8	474.57	0.12278	1.0956	Exercise	Control	Protein LOC685953 OS=Rattus norvegicus GN=LOC685953 PE=4 SV=1	1.3816e+07	1.21513e+07	1.25364e+07	1.12537e+07	1.26772e+07	1.77211e+07	1.48737e+07	1.55967e+07	1.52343e+07	1.64671e+07	1.522e+07	1.29397e+07	1.56983e+07	1.42194e+07	1.49104e+07	1.65127e+07	1.52318e+07	1.06655e+07	1.04278e+07	1.00161e+07	1.09254e+07	1.33134e+07	1.49987e+07	1.27935e+07	1.26626e+07	1.42074e+07	1.30271e+07	1.41489e+07	1.56983e+07	1.69554e+07	1.52711e+07	1.60691e+07	7	5	4	4	4	6	6	4	4
Q4QQW3	2	2	119.33	0.122808	1.12378	Exercise	Control	Hydroxyacid-oxoacid transhydrogenase, mitochondrial OS=Rattus norvegicus GN=Adhfe1 PE=1 SV=1	1.72866e+06	1.68313e+06	1.51324e+06	1.28434e+06	1.30389e+06	2.10612e+06	1.53408e+06	1.70561e+06	1.70595e+06	2.14258e+06	1.82576e+06	1.36364e+06	1.72052e+06	1.91562e+06	1.90153e+06	1.87512e+06	1.90582e+06	1.47732e+06	1.25871e+06	1.14309e+06	1.12371e+06	1.58228e+06	1.54697e+06	1.39907e+06	1.41797e+06	1.84856e+06	1.56271e+06	1.49107e+06	1.72052e+06	2.28421e+06	1.94752e+06	1.82475e+06	1	0	1	1	1	0	1	0	0
G3V7Q3	1	1	48.92	0.124568	1.4926	Exercise	Control	Coiled-coil domain-containing protein 127 OS=Rattus norvegicus GN=Ccdc127 PE=4 SV=1	616553	552446	660817	629494	942605	45177.1	781586	661783	795494	1.34296e+06	671648	788606	998516	1.15585e+06	1.02394e+06	522512	679739	484896	549666	560265	812348	33940.4	788153	542843	661210	1.15867e+06	574878	862301	998516	1.37825e+06	1.04871e+06	508475	1	0	0	0	0	0	0	0	0
Q5XIM4	3	2	147.46	0.124607	1.13852	Control	Exercise	ATP synthase subunit s, mitochondrial OS=Rattus norvegicus GN=Atp5s PE=2 SV=1	607379	837005	797215	865225	871166	915783	721001	987762	633064	708513	589606	671897	881999	948371	601029	764722	669624	734660	663121	770071	750781	688004	727058	810234	526199	611287	504657	734686	881999	1.13085e+06	615567	744179	0	0	0	1	1	1	0	1	0
A0JPQ4	12	12	853.31	0.128397	1.22478	Control	Exercise	Tripartite motif-containing protein 72 OS=Rattus norvegicus GN=Trim72 PE=2 SV=1	3.11093e+07	2.13961e+07	2.8083e+07	1.61049e+07	2.37795e+07	1.4663e+07	2.20565e+07	2.01643e+07	2.35601e+07	1.09884e+07	1.57112e+07	2.13221e+07	1.67026e+07	2.00034e+07	1.77706e+07	1.87483e+07	3.42974e+07	1.87799e+07	2.33594e+07	1.43337e+07	2.04935e+07	1.10159e+07	2.22418e+07	1.65402e+07	1.9583e+07	9.48052e+06	1.34476e+07	2.33147e+07	1.67026e+07	2.38524e+07	1.82004e+07	1.82447e+07	11	8	11	8	11	7	10	8	8
Q5U1Z9	8	8	451.65	0.13059	1.13722	Exercise	Control	Metaxin 2 OS=Rattus norvegicus GN=Mtx2 PE=2 SV=1	1.40172e+07	1.44974e+07	1.36846e+07	1.07474e+07	1.33536e+07	1.09435e+07	1.63912e+07	1.03038e+07	1.58444e+07	1.47803e+07	1.41448e+07	1.39344e+07	1.71306e+07	1.62188e+07	1.5855e+07	1.02924e+07	1.54537e+07	1.27247e+07	1.13828e+07	9.56542e+06	1.15082e+07	8.22156e+06	1.65289e+07	8.45189e+06	1.31698e+07	1.2752e+07	1.21068e+07	1.52365e+07	1.71306e+07	1.93396e+07	1.62385e+07	1.00159e+07	6	4	5	4	4	4	7	3	7
D4A7G4	1	1	59.35	0.133872	1.52557	Control	Exercise	Synaptojanin-2-binding protein OS=Rattus norvegicus GN=Cox16 PE=4 SV=1	3021.53	4687.73	3398.05	4631.63	8041.59	8301.89	4854.23	12341.6	381.937	8343.19	3236.06	3343.93	4249.85	6930.08	4429.37	1387.01	3331.19	4114.54	2826.49	4122.26	6930.33	6236.99	4895.01	10123.5	317.464	7198.28	2769.81	3656.42	4249.85	8263.54	4536.51	1349.75	0	0	0	0	1	1	0	1	0
Q6IMX8;A1A5R4;D3ZC28;D3ZHE0;D3ZIQ1;D3ZSE3;D3ZVF6;F1LT72	13	13	1032.82	0.134677	1.14868	Exercise	Control	Acyl-CoA thioesterase 2 OS=Rattus norvegicus GN=Acot2 PE=2 SV=1	6.07851e+07	6.38878e+07	5.52346e+07	5.86112e+07	6.5504e+07	6.59091e+07	7.09235e+07	7.9142e+07	5.08617e+07	9.99085e+07	6.85382e+07	7.11255e+07	8.19622e+07	7.89669e+07	8.02577e+07	6.56912e+07	6.70145e+07	5.60759e+07	4.5944e+07	5.21654e+07	5.64521e+07	4.95157e+07	7.15194e+07	6.4918e+07	4.22759e+07	8.61984e+07	5.86633e+07	7.77721e+07	8.19622e+07	9.41614e+07	8.2199e+07	6.39265e+07	14	16	15	15	11	13	13	15	14
Q3MHT2	4	4	222.33	0.136104	1.19484	Exercise	Control	Cysteine desulfurase, mitochondrial OS=Rattus norvegicus GN=Nfs1 PE=2 SV=1	1.19429e+06	849853	1.00712e+06	1.09495e+06	1.06227e+06	1.56711e+06	1.11791e+06	1.27006e+06	881907	1.66308e+06	1.43212e+06	1.04457e+06	1.30236e+06	1.24598e+06	1.58672e+06	1.79222e+06	1.31668e+06	745937	837723	974531	915477	1.17733e+06	1.1273e+06	1.04179e+06	733036	1.43486e+06	1.22578e+06	1.14219e+06	1.30236e+06	1.48573e+06	1.6251e+06	1.74407e+06	1	2	2	1	2	2	2	2	1
B5DEL8	7	7	438.09	0.138818	1.06164	Exercise	Control	NADH dehydrogenase (Ubiquinone) Fe-S protein 5 OS=Rattus norvegicus GN=Ndufs5 PE=4 SV=1	7.95039e+07	7.31976e+07	7.37319e+07	7.6664e+07	7.6577e+07	7.74866e+07	6.3679e+07	8.45305e+07	7.56069e+07	8.88859e+07	8.45721e+07	7.7362e+07	7.34009e+07	7.77815e+07	8.75948e+07	7.74791e+07	8.76516e+07	6.42473e+07	6.133e+07	6.82327e+07	6.5995e+07	5.82137e+07	6.4214e+07	6.9338e+07	6.2844e+07	7.66884e+07	7.23871e+07	8.45915e+07	7.34009e+07	9.27478e+07	8.97136e+07	7.53977e+07	7	5	5	5	4	5	5	8	5
D3ZGS0	1	1	53	0.139722	1.26478	Exercise	Control	Protein Dap3 OS=Rattus norvegicus GN=Dap3 PE=4 SV=1	257642	364002	148865	235745	155730	316725	182000	365182	310470	363007	289714	230412	317647	481761	376123	193179	284046	319494	123825	209819	134210	237947	183529	299549	258060	313193	247972	251944	317647	574460	385221	187990	0	0	0	0	0	1	0	0	0
D4A104	1	1	48.66	0.146483	1.44398	Exercise	Control	Mitochondrial ribosomal protein L45 (Predicted) OS=Rattus norvegicus GN=Mrpl45 PE=4 SV=1	95564.9	103492	99949.5	74101.9	86999	91468.4	94615	104052	80365.8	132136	119107	84338.2	345145	117482	92814.6	111945	105359	90837.6	83137.8	65952.4	74976.8	68717.8	95410	85351.3	66799.5	114003	101946	92219.6	345145	140088	95059.6	108938	0	0	0	0	0	0	0	0	0
D3ZEG8	1	1	40.87	0.148935	1.11236	Exercise	Control	Protein RGD1309188 OS=Rattus norvegicus GN=RGD1309188 PE=4 SV=1	71133.4	69838	75289.3	79674.5	93613.7	98256.7	99550.9	87928.9	76169.4	92033.6	94984.6	79595.3	95005.9	90548.5	114240	108580	78423.3	61298.5	62625.4	70912.2	80677.4	73817.6	100387	72125.6	63311.5	79404.2	81299.4	87033.5	95005.9	107971	117003	105663	0	0	0	0	0	0	0	0	0
D4A9Z6	1	1	77.4	0.153225	1.24691	Exercise	Control	Mitochondrial ribosomal protein S35 (Predicted) OS=Rattus norvegicus GN=Mrps35 PE=4 SV=1	160443	163176	83792.2	87098.9	156310	309335	227210	251585	145502	295767	245776	220322	247005	243986	245906	149983	176885	143224	69698.2	77520.1	134710	232395	229119	206368	120940	255180	210365	240911	247005	290933	251854	145954	0	0	0	0	0	1	0	1	0
Q5M818	1	1	45.23	0.154601	1.19504	Exercise	Control	39S ribosomal protein L16, mitochondrial OS=Rattus norvegicus GN=Mrpl16 PE=2 SV=1	162672	129646	194103	136271	121682	213603	115747	251643	156039	242824	238904	138096	215550	243197	186779	162472	179343	113793	161454	121284	104867	160474	116719	206416	129698	209502	204483	151001	215550	289992	191297	158107	0	0	0	0	0	0	0	0	0
P02600;B2GV99;F1LP62	13	10	953.3	0.155153	1.39166	Control	Exercise	Myosin light chain 1/3, skeletal muscle isoform OS=Rattus norvegicus GN=Myl1 PE=1 SV=2	1.5312e+08	1.05609e+08	1.12309e+08	1.67454e+08	1.62305e+08	8.31144e+07	7.65794e+07	4.71278e+07	1.08774e+08	3.75373e+07	9.28856e+07	1.08903e+08	1.00279e+08	4.78901e+07	6.39709e+07	9.19407e+07	1.68812e+08	9.26957e+07	9.34182e+07	1.49038e+08	1.39876e+08	6.24417e+07	7.72229e+07	3.86576e+07	9.04124e+07	3.23862e+07	7.95028e+07	1.1908e+08	1.00279e+08	5.71049e+07	6.55182e+07	8.94708e+07	16	15	13	16	16	12	8	10	12
P08503;G3V796	19	18	1428.52	0.158568	1.09787	Exercise	Control	Medium-chain specific acyl-CoA dehydrogenase, mitochondrial OS=Rattus norvegicus GN=Acadm PE=1 SV=1	3.79442e+08	3.81557e+08	3.58665e+08	2.64749e+08	2.97536e+08	3.49085e+08	3.61485e+08	3.44363e+08	3.45381e+08	4.76581e+08	3.80167e+08	3.24938e+08	3.36751e+08	3.58125e+08	4.09884e+08	3.72905e+08	4.18328e+08	3.34903e+08	2.98337e+08	2.35633e+08	2.5642e+08	2.62259e+08	3.64522e+08	2.82471e+08	2.87078e+08	4.11181e+08	3.25393e+08	3.55304e+08	3.36751e+08	4.27033e+08	4.19798e+08	3.62888e+08	24	23	19	19	20	17	22	24	21
F1M563	1	1	40.89	0.159077	1.35503	Exercise	Control	FAST kinase domain-containing protein 2 (Fragment) OS=Rattus norvegicus GN=Fastkd2 PE=4 SV=1	62432.8	58705.4	49263.7	55797.5	30669.6	26097.6	45864.4	63676.4	36496.2	77285.4	68942.6	36507.9	51745.9	76539.9	62930.4	121409	68831	51527.2	40977.4	49661.1	26431.4	19606.4	46249.7	52232	30335.5	66679.8	59009.4	39919.5	51745.9	91267.4	64452.6	118148	0	0	0	0	0	0	0	0	0
F1LQI1	2	2	107.52	0.164943	1.13555	Exercise	Control	Hydroxyacylglutathione hydrolase, mitochondrial OS=Rattus norvegicus GN=Hagh PE=3 SV=1	209127	217808	189454	200129	160659	194705	317121	224046	199581	266746	213340	235546	281460	189642	260941	297990	230559	191176	157587	178119	138458	146277	319785	183779	165891	230141	182602	257558	281460	226132	267253	289985	1	1	0	0	1	0	1	1	0
Q5U2U0	2	2	76.9	0.165721	1.12723	Exercise	Control	ATP-dependent Clp protease ATP-binding subunit clpX-like, mitochondrial OS=Rattus norvegicus GN=Clpx PE=2 SV=1	297264	389358	282897	333635	304817	279369	318061	413586	251949	443894	379752	337443	418532	363440	400031	357157	327728	341749	235313	296943	262695	209882	320733	339253	209419	382980	325038	368977	418532	433371	409707	347563	0	1	1	1	1	0	0	0	0
P04466	13	13	1246.95	0.169116	1.40583	Control	Exercise	Myosin regulatory light chain 2, skeletal muscle isoform OS=Rattus norvegicus GN=Mylpf PE=2 SV=2	1.80878e+08	1.47744e+08	1.40102e+08	2.15385e+08	1.88145e+08	9.6325e+07	8.3006e+07	5.48831e+07	1.36621e+08	4.75087e+07	1.093e+08	1.30205e+08	1.07184e+08	5.77288e+07	7.94534e+07	1.19058e+08	1.99415e+08	1.29678e+08	1.16536e+08	1.91697e+08	1.62145e+08	7.23664e+07	8.37034e+07	4.50191e+07	1.13558e+08	4.09893e+07	9.35521e+07	1.42372e+08	1.07184e+08	6.88367e+07	8.13753e+07	1.15859e+08	15	13	15	19	17	12	13	14	15
D3ZXA6	15	14	777.14	0.169417	1.09542	Exercise	Control	Protein Pdpr OS=Rattus norvegicus GN=Pdpr PE=3 SV=1	2.25678e+07	2.15966e+07	2.37365e+07	1.69655e+07	2.0225e+07	2.11106e+07	2.01765e+07	1.88699e+07	2.12588e+07	2.95685e+07	2.07605e+07	2.01484e+07	2.3243e+07	2.46713e+07	2.18657e+07	1.95008e+07	2.48806e+07	1.89559e+07	1.97439e+07	1.50997e+07	1.74301e+07	1.58598e+07	2.0346e+07	1.54784e+07	1.76702e+07	2.5511e+07	1.77693e+07	2.20313e+07	2.3243e+07	2.94184e+07	2.23946e+07	1.89769e+07	7	4	6	7	6	6	5	8	4
P60711;D4A5P1;F2Z3T1	19	4	1431.35	0.170303	1.27079	Control	Exercise	Actin, cytoplasmic 1 OS=Rattus norvegicus GN=Actb PE=1 SV=1	5.8149e+06	6.43266e+06	1.10252e+07	1.10643e+07	1.61278e+07	1.11013e+07	9.81283e+06	8.85338e+06	4.21016e+06	5.46964e+06	9.15505e+06	9.53161e+06	9.54823e+06	5.81272e+06	7.22076e+06	1.21877e+07	6.41083e+06	5.6461e+06	9.17074e+06	9.84746e+06	1.38991e+07	8.3401e+06	9.89528e+06	7.26219e+06	3.49946e+06	4.71906e+06	7.836e+06	1.04223e+07	9.54823e+06	6.93117e+06	7.39542e+06	1.18602e+07	4	3	3	2	3	1	2	3	1
G3V644	3	2	193.61	0.17155	1.17176	Exercise	Control	NADH dehydrogenase (Ubiquinone) flavoprotein 3-like, isoform CRA_a OS=Rattus norvegicus GN=Ndufv3 PE=4 SV=1	3.44885e+06	3.84497e+06	4.67581e+06	3.86654e+06	3.49029e+06	4.07597e+06	2.90439e+06	4.25132e+06	3.31882e+06	6.94281e+06	4.72696e+06	3.84955e+06	3.73028e+06	3.78675e+06	5.22958e+06	4.22209e+06	3.80229e+06	3.37482e+06	3.88933e+06	3.44131e+06	3.00797e+06	3.06217e+06	2.92879e+06	3.48724e+06	2.75858e+06	5.99007e+06	4.04591e+06	4.20929e+06	3.73028e+06	4.51538e+06	5.35607e+06	4.10867e+06	1	1	1	0	1	1	1	1	1
Q5XID6	1	1	38.5	0.172898	1.11931	Exercise	Control	Protein Sgcg OS=Rattus norvegicus GN=Sgcg PE=2 SV=1	610250	597821	639987	576540	636936	884595	1.02694e+06	700321	936652	710329	815274	824558	702818	958926	692601	709106	672790	524722	532339	513134	548919	664573	1.03557e+06	574454	778539	612853	697810	901613	702818	1.14344e+06	709354	690057	0	0	0	0	0	0	0	1	0
F1M964	8	8	555.28	0.173568	1.13173	Exercise	Control	Mitochondrial-processing peptidase subunit alpha OS=Rattus norvegicus GN=Pmpca PE=3 SV=1	6.85885e+06	7.36814e+06	5.79855e+06	5.55718e+06	5.71103e+06	6.51759e+06	6.82617e+06	6.8713e+06	8.17458e+06	9.9596e+06	6.33624e+06	5.7468e+06	7.78923e+06	8.08392e+06	6.17961e+06	6.02404e+06	7.56176e+06	6.4672e+06	4.82322e+06	4.94602e+06	4.92183e+06	4.89649e+06	6.88352e+06	5.63634e+06	6.79466e+06	8.59288e+06	5.42333e+06	6.28383e+06	7.78923e+06	9.63939e+06	6.32908e+06	5.86221e+06	7	4	3	3	2	3	5	6	4
P26772;F1LZ82	9	9	601.77	0.175069	1.1028	Exercise	Control	10 kDa heat shock protein, mitochondrial OS=Rattus norvegicus GN=Hspe1 PE=1 SV=3	7.57668e+07	8.28412e+07	7.35005e+07	6.39581e+07	6.75381e+07	9.55306e+07	8.26504e+07	9.59234e+07	6.72357e+07	9.845e+07	9.11685e+07	7.75239e+07	8.64252e+07	9.95259e+07	8.92311e+07	9.37071e+07	8.35315e+07	7.27118e+07	6.11375e+07	5.69242e+07	5.82052e+07	7.17696e+07	8.33448e+07	7.86833e+07	5.58859e+07	8.49401e+07	7.80331e+07	8.47685e+07	8.64252e+07	1.18676e+08	9.13895e+07	9.11897e+07	10	8	9	10	9	11	12	11	10
D3ZQY3	1	1	63.95	0.176313	1.13241	Control	Exercise	Protein Slc30a9 OS=Rattus norvegicus GN=Slc30a9 PE=4 SV=1	382257	337325	422347	339976	343074	269962	230702	294446	259221	352820	291965	269863	271970	293145	328313	246437	421432	296079	351307	302587	295666	202815	232640	241526	215463	304404	249899	295082	271970	349551	336254	239816	1	0	1	0	0	0	0	1	0
B2RYT5;D3ZYX8	4	4	253.14	0.178024	1.12201	Exercise	Control	Cox7a2l protein OS=Rattus norvegicus GN=Cox7a2l PE=4 SV=1	1.01434e+07	7.27499e+06	9.63286e+06	9.49948e+06	9.65715e+06	1.02802e+07	9.72265e+06	1.24648e+07	9.89121e+06	1.34749e+07	1.35032e+07	8.62147e+06	1.21993e+07	1.08156e+07	1.05764e+07	9.19226e+06	1.1183e+07	6.38544e+06	8.01259e+06	8.45476e+06	8.32264e+06	7.72326e+06	9.80434e+06	1.02245e+07	8.22151e+06	1.16258e+07	1.15577e+07	9.42714e+06	1.21993e+07	1.28967e+07	1.08322e+07	8.94532e+06	3	3	3	3	3	3	3	3	3
D3ZL02;D3ZX26	19	19	1065.79	0.178654	1.11165	Control	Exercise	Protein Dysf OS=Rattus norvegicus GN=Dysf PE=4 SV=1	1.19654e+07	1.18326e+07	1.1353e+07	1.20005e+07	1.34919e+07	1.85587e+07	1.29176e+07	1.35172e+07	1.56718e+07	1.04734e+07	1.09393e+07	1.29875e+07	1.0839e+07	1.1169e+07	1.1078e+07	1.1869e+07	1.31917e+07	1.03858e+07	9.44336e+06	1.06807e+07	1.16275e+07	1.39427e+07	1.30262e+07	1.10878e+07	1.30263e+07	9.03617e+06	9.36316e+06	1.42012e+07	1.0839e+07	1.33181e+07	1.13459e+07	1.15501e+07	9	9	9	9	10	12	9	12	11
D3ZD10;D3ZK40;D3ZXM8	22	22	1404.62	0.180103	1.11943	Control	Exercise	Uncharacterized protein OS=Rattus norvegicus GN=Crat PE=3 SV=1	7.76336e+07	7.33668e+07	5.59301e+07	5.61769e+07	6.43391e+07	8.60799e+07	5.82301e+07	7.21755e+07	4.94114e+07	6.0103e+07	5.14289e+07	5.57604e+07	6.20144e+07	6.81307e+07	5.84081e+07	8.06458e+07	8.55896e+07	6.43958e+07	4.65225e+07	4.99987e+07	5.54482e+07	6.46695e+07	5.87193e+07	5.92036e+07	4.10705e+07	5.18553e+07	4.40191e+07	6.09712e+07	6.20144e+07	8.12401e+07	5.98209e+07	7.84794e+07	21	19	12	15	13	14	15	13	15
D3ZD55	2	2	195.28	0.180965	1.11806	Exercise	Control	OCIA domain-containing protein 1 OS=Rattus norvegicus GN=Ociad1 PE=4 SV=1	4.75832e+06	5.74769e+06	4.13382e+06	4.22016e+06	4.67594e+06	4.7656e+06	4.73198e+06	4.70409e+06	4.3276e+06	7.19644e+06	6.44881e+06	4.60541e+06	5.14048e+06	5.07457e+06	4.65239e+06	4.74709e+06	5.24596e+06	5.04489e+06	3.4385e+06	3.75604e+06	4.02978e+06	3.58027e+06	4.77174e+06	3.85864e+06	3.59708e+06	6.2089e+06	5.51968e+06	5.03578e+06	5.14048e+06	6.05099e+06	4.76492e+06	4.61957e+06	1	1	1	1	1	1	1	2	1
P04764;F1M6P0	6	1	570.37	0.181497	1.43467	Control	Exercise	Alpha-enolase OS=Rattus norvegicus GN=Eno1 PE=1 SV=4	868483	501929	413269	919027	619831	424204	411691	179255	660725	261891	482843	470646	280724	163094	252429	451116	957487	440556	343756	817956	534177	318693	415150	147038	549190	225953	413276	514628	280724	194476	258535	438998	1	0	0	0	0	0	0	0	1
P04636	22	21	2103.35	0.182635	1.06875	Exercise	Control	Malate dehydrogenase, mitochondrial OS=Rattus norvegicus GN=Mdh2 PE=1 SV=2	4.70068e+09	4.51337e+09	4.61434e+09	4.09993e+09	3.98462e+09	4.87806e+09	4.03477e+09	4.8679e+09	4.45449e+09	5.60192e+09	4.95043e+09	4.02831e+09	4.49265e+09	4.61084e+09	5.14873e+09	4.86034e+09	5.18242e+09	3.9615e+09	3.8382e+09	3.64903e+09	3.43399e+09	3.66476e+09	4.06867e+09	3.99301e+09	3.70254e+09	4.83319e+09	4.23718e+09	4.40476e+09	4.49265e+09	5.49804e+09	5.27327e+09	4.72977e+09	60	65	59	57	52	57	57	58	59
G3V822	2	2	87.97	0.18295	1.13598	Exercise	Control	Carboxylesterase 1D OS=Rattus norvegicus GN=Ces1d PE=4 SV=1	246141	316776	402876	421989	216211	193209	344261	206156	325890	335858	353015	283012	355458	286669	400788	326151	271366	278042	335111	375580	186333	145153	347154	169104	270878	289770	302153	309459	355458	341829	410482	317389	0	0	0	1	0	0	2	0	1
Q8R4I6	71	49	6876.25	0.184348	1.2375	Control	Exercise	Actinin alpha 3, isoform CRA_a OS=Rattus norvegicus GN=Actn3 PE=2 SV=1	1.32932e+09	1.53046e+09	1.99017e+09	1.54938e+09	2.34512e+09	1.19772e+09	1.44343e+09	8.88588e+08	1.96103e+09	6.2821e+08	1.06506e+09	1.59365e+09	1.31201e+09	1.19127e+09	9.51519e+08	1.21574e+09	1.46555e+09	1.34332e+09	1.65542e+09	1.37898e+09	2.02105e+09	8.99815e+08	1.45556e+09	7.28884e+08	1.63e+09	5.42003e+08	9.1161e+08	1.74258e+09	1.31201e+09	1.42049e+09	9.74535e+08	1.18308e+09	77	85	86	86	98	78	88	68	85
F8WFK3	2	2	130.37	0.184587	1.4273	Control	Exercise	Gelsolin OS=Rattus norvegicus GN=Gsn PE=4 SV=1	869667	255007	859126	831162	1.00437e+06	618437	509977	317144	651558	170167	214441	738325	499507	479646	446314	488749	958792	223826	714619	739754	865578	464616	514262	260145	541571	146816	183545	807321	499507	571937	457109	475619	1	1	1	1	0	0	0	0	1
B1WC67	1	1	35.73	0.184611	1.16017	Exercise	Control	Protein Slc25a24 OS=Rattus norvegicus GN=Slc25a24 PE=2 SV=1	268278	190651	168705	178660	134699	165510	470678	305751	295517	248933	292947	210745	258100	358085	281264	238926	295772	167339	140328	159012	116085	124343	474632	250799	245632	214773	250739	230439	258100	426986	288068	232507	0	0	0	0	0	0	1	0	0
B0BNE6	11	10	627.93	0.188029	1.09754	Exercise	Control	NADH dehydrogenase (Ubiquinone) Fe-S protein 8 (Predicted), isoform CRA_a OS=Rattus norvegicus GN=Ndufs8 PE=2 SV=1	6.23225e+07	6.7705e+07	6.04206e+07	5.91002e+07	7.31389e+07	7.34088e+07	7.02839e+07	6.43559e+07	6.48879e+07	8.35097e+07	7.28186e+07	6.07045e+07	7.64905e+07	7.04542e+07	9.33077e+07	6.03304e+07	6.87094e+07	5.94264e+07	5.02577e+07	5.26006e+07	6.3032e+07	5.51501e+07	7.08744e+07	5.27893e+07	5.39344e+07	7.205e+07	6.2327e+07	6.63774e+07	7.64905e+07	8.40107e+07	9.55646e+07	5.87097e+07	8	9	7	7	8	8	7	8	9
P27274	3	3	177.84	0.190142	1.09886	Exercise	Control	CD59 glycoprotein OS=Rattus norvegicus GN=Cd59 PE=1 SV=2	1.84483e+06	1.87358e+06	1.97728e+06	2.13062e+06	2.92213e+06	2.8292e+06	1.87554e+06	2.03245e+06	2.56558e+06	2.42177e+06	2.9697e+06	2.41299e+06	2.10616e+06	2.15065e+06	2.32214e+06	2.26524e+06	2.03389e+06	1.64449e+06	1.64469e+06	1.8963e+06	2.51833e+06	2.1255e+06	1.8913e+06	1.66717e+06	2.13249e+06	2.08944e+06	2.54183e+06	2.63848e+06	2.10616e+06	2.56446e+06	2.37831e+06	2.20439e+06	3	2	2	2	3	3	2	2	3
D3ZQN6	1	1	39.96	0.193115	1.40125	Control	Exercise	Protein Stac3 OS=Rattus norvegicus GN=Stac3 PE=4 SV=1	15278.4	19579.5	25215.4	19778	67590.1	22499.3	19890.7	22224.5	16516.9	8145.69	25595.1	29695.3	18253.3	14643.8	18466.2	20016.7	16844.2	17185.4	20974.1	17602.9	58249.9	16903.1	20057.8	18230.1	13728.8	7027.89	21907.4	32470.3	18253.3	17461.5	18912.8	19479	0	0	0	0	0	0	1	0	0
Q920F5	7	7	368.34	0.194921	1.17012	Exercise	Control	Malonyl-CoA decarboxylase, mitochondrial OS=Rattus norvegicus GN=Mlycd PE=2 SV=1	2.10601e+06	2.92817e+06	2.06056e+06	1.82768e+06	2.44447e+06	1.91901e+06	2.19119e+06	2.03003e+06	2.85386e+06	2.76347e+06	1.98466e+06	2.08916e+06	1.8886e+06	2.2275e+06	2.68838e+06	3.98987e+06	2.32184e+06	2.57012e+06	1.71397e+06	1.62668e+06	2.10667e+06	1.44171e+06	2.2096e+06	1.66518e+06	2.37211e+06	2.38425e+06	1.69872e+06	2.2844e+06	1.8886e+06	2.65611e+06	2.75341e+06	3.88269e+06	0	1	0	0	2	0	0	0	1
Q8HIC4	1	1	37.63	0.196089	1.11261	Exercise	Control	Cytochrome b OS=Rattus norvegicus GN=Mt-cyb PE=2 SV=1	1.04504e+07	1.30851e+07	9.55034e+06	8.81304e+06	8.3781e+06	7.75344e+06	9.56499e+06	8.55999e+06	1.19873e+07	1.11659e+07	1.04744e+07	1.00376e+07	8.28435e+06	1.27564e+07	1.15449e+07	8.48028e+06	1.15213e+07	1.14851e+07	7.94395e+06	7.84381e+06	7.22034e+06	5.82496e+06	9.64535e+06	7.02152e+06	9.96381e+06	9.63363e+06	8.9653e+06	1.09756e+07	8.28435e+06	1.52109e+07	1.18241e+07	8.25247e+06	0	1	0	0	1	1	1	0	1
D3ZGP8	4	4	245.04	0.196394	1.12072	Exercise	Control	Cathepsin D 34 kDa heavy chain OS=Rattus norvegicus GN=Ctsd PE=3 SV=1	3.20069e+06	3.76985e+06	3.16278e+06	3.4e+06	4.67948e+06	4.62229e+06	3.62e+06	3.82919e+06	2.78953e+06	4.63741e+06	4.47775e+06	4.14014e+06	4.11035e+06	4.14415e+06	4.81931e+06	4.82153e+06	3.5287e+06	3.30889e+06	2.63079e+06	3.02608e+06	4.03283e+06	3.47261e+06	3.65041e+06	3.14098e+06	2.31864e+06	4.00104e+06	3.8326e+06	4.52704e+06	4.11035e+06	4.94155e+06	4.93589e+06	4.692e+06	3	2	2	1	1	1	2	1	2
Q63518	13	3	766.72	0.197876	1.28937	Control	Exercise	Myosin-binding protein C, slow-type (Fragment) OS=Rattus norvegicus GN=Mybpc1 PE=2 SV=1	3.32583e+06	3.01225e+06	2.91267e+06	4.61089e+06	3.95869e+06	1.98731e+06	2.0982e+06	1.55072e+06	3.01608e+06	1.55056e+06	2.59541e+06	2.40759e+06	2.59883e+06	1.06357e+06	2.49268e+06	2.46751e+06	3.66667e+06	2.64393e+06	2.42275e+06	4.1038e+06	3.41164e+06	1.49301e+06	2.11583e+06	1.27202e+06	2.50694e+06	1.33778e+06	2.22146e+06	2.63258e+06	2.59883e+06	1.26822e+06	2.55298e+06	2.40122e+06	1	1	2	3	1	1	1	0	1
Q02485;D3ZPR1	10	10	614.58	0.198549	1.0586	Exercise	Control	Voltage-dependent L-type calcium channel subunit alpha-1S (Fragment) OS=Rattus norvegicus GN=Cacna1s PE=1 SV=1	1.28259e+07	1.20986e+07	1.2389e+07	1.07208e+07	1.36056e+07	1.43591e+07	1.2832e+07	1.22933e+07	1.50712e+07	1.19145e+07	1.3977e+07	1.21753e+07	1.28456e+07	1.44234e+07	1.37916e+07	1.28512e+07	1.41403e+07	1.06192e+07	1.03051e+07	9.5418e+06	1.17255e+07	1.07876e+07	1.29398e+07	1.00839e+07	1.25271e+07	1.02795e+07	1.19632e+07	1.33131e+07	1.28456e+07	1.71987e+07	1.41252e+07	1.2506e+07	5	4	4	5	5	3	5	2	5
F1LP63;O88483	9	9	558.27	0.199472	1.0967	Exercise	Control	[Pyruvate dehydrogenase [acetyl-transferring]]-phosphatase 1, mitochondrial OS=Rattus norvegicus GN=Pdp1 PE=3 SV=1	5.92009e+06	5.52421e+06	5.7843e+06	4.54109e+06	5.29603e+06	5.75734e+06	4.58463e+06	6.42681e+06	5.29099e+06	7.49992e+06	5.48458e+06	5.44516e+06	6.12939e+06	6.51485e+06	6.77992e+06	4.92854e+06	6.5268e+06	4.84873e+06	4.81137e+06	4.04168e+06	4.56418e+06	4.32534e+06	4.62315e+06	5.27174e+06	4.39784e+06	6.47074e+06	4.69437e+06	5.95401e+06	6.12939e+06	7.76841e+06	6.94391e+06	4.79614e+06	6	7	7	3	5	5	4	6	7
F1LNI6	4	4	176.9	0.200934	1.26962	Control	Exercise	Protein Myom1 OS=Rattus norvegicus GN=Myom1 PE=4 SV=1	882632	526483	640734	858847	853420	431405	422445	356058	722812	310731	544806	597622	447513	444514	416076	432081	973085	462107	532961	764394	735487	324103	425995	292065	600797	268090	466311	653469	447513	530045	426141	420474	3	0	0	1	3	1	0	0	0
F1M7F3	8	8	682.36	0.203034	1.0823	Exercise	Control	Protein Apool (Fragment) OS=Rattus norvegicus GN=Apool PE=4 SV=1	1.90524e+07	1.96864e+07	2.07027e+07	1.63994e+07	1.54588e+07	1.8599e+07	1.83231e+07	2.33247e+07	2.1212e+07	2.44405e+07	2.17405e+07	1.70904e+07	2.09094e+07	2.13824e+07	1.87246e+07	1.85184e+07	2.10049e+07	1.72792e+07	1.72205e+07	1.45959e+07	1.33226e+07	1.39729e+07	1.84771e+07	1.91326e+07	1.76313e+07	2.10867e+07	1.86082e+07	1.86874e+07	2.09094e+07	2.54968e+07	1.91775e+07	1.80209e+07	7	7	6	5	4	3	3	8	7
D3ZCM1;D4A2F5;F1LU69	2	2	130.96	0.203423	1.2112	Control	Exercise	Uncharacterized protein OS=Rattus norvegicus PE=4 SV=1	8.7318e+06	7.07891e+06	9.94614e+06	1.19278e+07	1.45103e+07	1.14584e+07	1.0858e+07	5.61783e+06	8.02476e+06	6.68839e+06	7.52527e+06	1.00169e+07	9.3049e+06	6.53274e+06	7.56984e+06	1.04941e+07	9.62665e+06	6.21334e+06	8.27317e+06	1.06161e+07	1.25052e+07	8.60836e+06	1.09492e+07	4.60815e+06	6.67013e+06	5.77056e+06	6.44104e+06	1.0953e+07	9.3049e+06	7.78975e+06	7.75294e+06	1.02122e+07	1	2	2	2	2	2	2	2	2
Q4FZX5	1	1	40.08	0.204477	1.19653	Exercise	Control	Methionine-R-sulfoxide reductase B2, mitochondrial OS=Rattus norvegicus GN=Msrb2 PE=2 SV=1	114591	110109	37121.1	104428	113839	116253	113323	131336	83486.1	140430	101092	112056	138599	148963	126425	155235	126334	96645.8	30877.2	92943.8	98107.9	87338.1	114275	107731	69393.1	121159	86527.2	122527	138599	177625	129483	151065	0	0	0	0	0	0	0	0	0
D3ZBA9	1	1	58.66	0.205644	1.21858	Exercise	Control	Protein RGD1565192 OS=Rattus norvegicus GN=RGD1565192 PE=4 SV=1	1.27896e+06	1.40942e+06	982989	1.10032e+06	685598	695303	786166	1.28565e+06	818144	1.60526e+06	1.3999e+06	1.41918e+06	1.36074e+06	1.29114e+06	1.44085e+06	686868	1.41003e+06	1.23708e+06	817648	979312	590857	522363	792771	1.05459e+06	680037	1.38498e+06	1.19821e+06	1.5518e+06	1.36074e+06	1.53958e+06	1.4757e+06	668416	1	0	0	0	0	0	0	1	0
D3ZAQ0	5	5	403.63	0.206064	1.1473	Control	Exercise	Protein Fundc2 OS=Rattus norvegicus GN=Fundc2 PE=4 SV=1	1.44517e+07	1.52756e+07	1.095e+07	1.44335e+07	1.5576e+07	9.40688e+06	1.61406e+07	1.51031e+07	9.43369e+06	1.8817e+07	1.22306e+07	7.84216e+06	1.3516e+07	1.16927e+07	1.03607e+07	1.31504e+07	1.59327e+07	1.34078e+07	9.10822e+06	1.28462e+07	1.34236e+07	7.06714e+06	1.62762e+07	1.23886e+07	7.84123e+06	1.62348e+07	1.04685e+07	8.57501e+06	1.3516e+07	1.39426e+07	1.06114e+07	1.27971e+07	6	6	5	5	6	4	5	4	6
Q9R1Z0	13	1	1322.02	0.207089	1.14434	Exercise	Control	Voltage-dependent anion-selective channel protein 3 OS=Rattus norvegicus GN=Vdac3 PE=1 SV=2	5.17913e+06	6.61493e+06	5.43921e+06	5.85301e+06	4.59744e+06	6.51769e+06	6.97927e+06	7.47588e+06	5.49269e+06	6.91111e+06	5.90452e+06	5.38702e+06	7.00365e+06	8.58719e+06	9.88777e+06	6.50555e+06	5.7099e+06	5.80609e+06	4.52432e+06	5.20932e+06	3.96213e+06	4.89657e+06	7.03791e+06	6.13225e+06	4.56549e+06	5.96272e+06	5.05381e+06	5.89044e+06	7.00365e+06	1.02395e+07	1.01269e+07	6.33079e+06	3	2	1	1	3	1	3	3	1
F1M6X5;F1LUU2	3	3	160.71	0.210988	1.16593	Exercise	Control	Thioredoxin reductase 2, mitochondrial (Fragment) OS=Rattus norvegicus GN=Txnrd2 PE=3 SV=1	958928	1.27465e+06	1.11707e+06	654420	582866	959782	1.36573e+06	1.50259e+06	811192	1.30219e+06	1.68399e+06	1.30993e+06	1.18275e+06	1.14787e+06	1.23714e+06	1.13741e+06	1.0572e+06	1.11879e+06	929175	582449	502320	721059	1.37721e+06	1.23253e+06	674258	1.1235e+06	1.44136e+06	1.43235e+06	1.18275e+06	1.36873e+06	1.26707e+06	1.10685e+06	0	2	1	0	0	1	2	1	0
D4ACY1	1	1	36.07	0.211519	1.20626	Control	Exercise	Protein RGD1565784 OS=Rattus norvegicus GN=RGD1565784 PE=4 SV=1	58253.5	83173	53323.6	79974.6	76146.6	126966	94047.7	96736.6	45536.5	73876.1	39106.9	70622.6	63956.6	90088.3	104392	66713	64223.4	73003	44354.4	71179.3	65624	95386.5	94837.8	79350.4	37849.7	63738.4	33472.4	77222.3	63956.6	107423	106917	64920.9	0	1	0	0	0	0	0	0	0
P29117;B0BMU0;D3ZYJ1	8	8	450.3	0.213496	1.13161	Exercise	Control	Peptidyl-prolyl cis-trans isomerase F, mitochondrial OS=Rattus norvegicus GN=Ppif PE=1 SV=2	1.51178e+07	1.50094e+07	1.45645e+07	1.30654e+07	1.30168e+07	1.55425e+07	1.64184e+07	1.83093e+07	1.14266e+07	2.00936e+07	1.63265e+07	1.39176e+07	1.69788e+07	2.08152e+07	2.10033e+07	1.64129e+07	1.66671e+07	1.31741e+07	1.21147e+07	1.16285e+07	1.1218e+07	1.16766e+07	1.65564e+07	1.50186e+07	9.49771e+06	1.73362e+07	1.39742e+07	1.52182e+07	1.69788e+07	2.48203e+07	2.15114e+07	1.5972e+07	5	7	7	6	4	6	6	6	6
P29419	5	5	251.09	0.214447	1.06881	Control	Exercise	ATP synthase subunit e, mitochondrial OS=Rattus norvegicus GN=Atp5i PE=1 SV=3	1.56921e+08	1.39902e+08	1.16884e+08	1.26824e+08	1.32886e+08	1.44606e+08	1.13666e+08	1.26989e+08	1.17814e+08	1.49553e+08	1.29356e+08	1.22426e+08	1.17506e+08	1.26903e+08	1.11999e+08	1.14961e+08	1.73002e+08	1.22795e+08	9.72238e+07	1.12876e+08	1.14522e+08	1.08638e+08	1.14621e+08	1.04165e+08	9.79261e+07	1.2903e+08	1.10718e+08	1.33866e+08	1.17506e+08	1.51322e+08	1.14708e+08	1.11873e+08	8	8	7	8	8	7	8	7	8
D3ZLT1	4	4	432.37	0.214683	1.07445	Control	Exercise	NADH dehydrogenase (Ubiquinone) 1 beta subcomplex, 7 (Predicted) OS=Rattus norvegicus GN=Ndufb7 PE=4 SV=1	4.06779e+07	3.96257e+07	3.26402e+07	3.30656e+07	3.85624e+07	4.28754e+07	3.31153e+07	3.54065e+07	3.0758e+07	3.84654e+07	2.88348e+07	3.16456e+07	3.32759e+07	3.61617e+07	4.07789e+07	3.55397e+07	4.48466e+07	3.47805e+07	2.71501e+07	2.94291e+07	3.32335e+07	3.22112e+07	3.33935e+07	2.9043e+07	2.55658e+07	3.3187e+07	2.46803e+07	3.46029e+07	3.32759e+07	4.31198e+07	4.17653e+07	3.45849e+07	7	7	7	6	6	5	7	6	6
G3V7E4	1	1	77.55	0.218772	1.14206	Control	Exercise	Glycine C-acetyltransferase (2-amino-3-ketobutyrate-coenzyme A ligase), isoform CRA_b OS=Rattus norvegicus GN=Gcat PE=3 SV=1	223128	239672	274716	211603	231729	395768	214358	239925	170662	304057	207976	195307	193271	201018	291881	214101	245995	210366	228508	188332	199707	297330	216159	196804	141854	262332	178011	213558	193271	239698	298941	208350	1	1	1	0	0	0	0	0	0
B2RYS0	2	2	151.88	0.219557	1.10976	Exercise	Control	Cox7a2 protein OS=Rattus norvegicus GN=Cox7a2 PE=2 SV=1	3.92894e+07	4.47862e+07	4.36356e+07	4.43596e+07	3.76924e+07	5.02554e+07	4.48374e+07	6.05368e+07	4.0996e+07	6.69309e+07	5.71937e+07	4.0073e+07	4.84371e+07	5.20258e+07	5.2051e+07	4.77895e+07	4.33159e+07	3.931e+07	3.6296e+07	3.94811e+07	3.24837e+07	3.77556e+07	4.52141e+07	4.96567e+07	3.40756e+07	5.77462e+07	4.89533e+07	4.38179e+07	4.84371e+07	6.20364e+07	5.33101e+07	4.65057e+07	3	3	2	3	2	3	3	2	3
F1LMB8	3	3	163.19	0.219923	1.11822	Exercise	Control	Protein Grsf1 OS=Rattus norvegicus GN=Grsf1 PE=4 SV=1	1.49392e+06	1.66776e+06	1.51156e+06	1.04301e+06	1.18254e+06	2.42873e+06	1.71755e+06	1.79802e+06	1.72425e+06	2.23684e+06	1.61516e+06	1.4954e+06	1.73725e+06	2.12979e+06	1.71979e+06	1.7029e+06	1.64702e+06	1.46383e+06	1.25731e+06	928302	1.01913e+06	1.82464e+06	1.73198e+06	1.47486e+06	1.43319e+06	1.92989e+06	1.38245e+06	1.63515e+06	1.73725e+06	2.5396e+06	1.76139e+06	1.65715e+06	0	0	0	0	0	0	0	0	0
F1MAA7	6	5	398.38	0.220204	1.22027	Exercise	Control	Protein Lamc1 OS=Rattus norvegicus GN=Lamc1 PE=4 SV=1	542446	867603	917119	1.23255e+06	1.5598e+06	1.88439e+06	909195	920552	1.81635e+06	857797	1.55086e+06	927503	1.06193e+06	1.40049e+06	1.19799e+06	1.9665e+06	598037	761517	762857	1.09699e+06	1.34425e+06	1.41569e+06	916834	755103	1.50974e+06	740085	1.32741e+06	1.01418e+06	1.06193e+06	1.66997e+06	1.22697e+06	1.91368e+06	0	0	0	0	4	2	1	0	2
D3ZDE4;B5DEP0	5	5	285.82	0.220735	1.12729	Exercise	Control	Deoxyguanosine kinase (Predicted), isoform CRA_a OS=Rattus norvegicus GN=Dguok PE=4 SV=1	4.83409e+06	3.38923e+06	6.05876e+06	3.357e+06	4.67606e+06	4.05896e+06	4.29097e+06	4.96908e+06	4.17052e+06	5.93541e+06	5.12058e+06	5.14969e+06	6.19908e+06	5.59629e+06	4.3031e+06	3.69544e+06	5.3295e+06	2.97481e+06	5.03966e+06	2.98781e+06	4.02989e+06	3.04939e+06	4.32702e+06	4.07599e+06	3.46651e+06	5.12091e+06	4.38282e+06	5.63092e+06	6.19908e+06	6.6731e+06	4.40719e+06	3.59616e+06	3	4	3	2	3	4	3	2	3
P09605;P25809	19	19	1620.32	0.221372	1.09376	Exercise	Control	Creatine kinase S-type, mitochondrial OS=Rattus norvegicus GN=Ckmt2 PE=1 SV=2	6.31655e+08	5.06554e+08	5.82773e+08	6.31899e+08	5.94367e+08	5.31507e+08	6.13855e+08	7.63677e+08	5.38949e+08	8.53288e+08	7.2856e+08	6.80997e+08	6.9957e+08	5.82509e+08	6.37472e+08	5.90285e+08	6.96388e+08	4.44615e+08	4.84749e+08	5.62405e+08	5.12232e+08	3.99307e+08	6.19012e+08	6.26423e+08	4.47971e+08	7.36194e+08	6.23591e+08	7.44636e+08	6.9957e+08	6.94593e+08	6.52891e+08	5.74428e+08	47	36	39	42	42	38	41	45	36
Q6IFU9	4	1	241.5	0.222747	5.36288	Control	Exercise	Protein Krt16 OS=Rattus norvegicus GN=Krt16 PE=2 SV=1	8979.28	25485.9	7584.71	22516.6	354807	2342.58	7824.39	2868.04	40810.5	10074.3	7801.2	5596.91	0	6878.95	1252.08	8215.99	9899.49	22369.6	6308.94	20040.3	305777	1759.92	7890.13	2352.57	33921.5	8691.84	6677.22	6119.94	0	8202.57	1282.37	7995.28	0	0	0	0	1	0	0	0	0
D4A520	1	1	62.12	0.224127	1.14812	Exercise	Control	Protein Pptc7 OS=Rattus norvegicus GN=Pptc7 PE=4 SV=1	212079	209835	126172	162893	114779	278268	260041	330086	214014	267535	209961	174766	264335	275767	261830	276890	233813	184178	104949	144978	98917.8	209055	262226	270760	177887	230822	179710	191098	264335	328829	268163	269452	0	1	0	0	0	0	1	0	0
D3ZQ61	2	2	97.74	0.224906	1.06557	Exercise	Control	Succinate dehydrogenase [ubiquinone] cytochrome b small subunit, mitochondrial OS=Rattus norvegicus GN=Sdhd PE=4 SV=1	1.02175e+07	8.58379e+06	8.77156e+06	1.02841e+07	1.22799e+07	1.05553e+07	9.33509e+06	1.19082e+07	1.03513e+07	1.2253e+07	1.08569e+07	9.44484e+06	1.05165e+07	1.11793e+07	1.153e+07	1.11764e+07	1.12647e+07	7.53421e+06	7.29616e+06	9.15309e+06	1.05829e+07	7.92993e+06	9.41352e+06	9.76796e+06	8.6039e+06	1.05715e+07	9.29268e+06	1.03275e+07	1.05165e+07	1.33304e+07	1.18088e+07	1.08761e+07	2	1	2	2	1	1	2	1	2
B2GV71	1	1	53.83	0.225761	1.13927	Exercise	Control	NADH dehydrogenase [ubiquinone] 1 alpha subcomplex assembly factor 5 OS=Rattus norvegicus PE=2 SV=1	367466	287389	278847	263308	287794	293087	246017	342017	332281	483125	398745	223804	330490	317634	317661	291698	405124	252249	231944	234350	248025	220189	248084	280547	276190	416828	341294	244718	330490	378751	325344	283862	1	0	1	0	0	0	1	1	1
Q5PQN9	1	1	45.04	0.233107	1.15088	Exercise	Control	39S ribosomal protein L38, mitochondrial OS=Rattus norvegicus GN=Mrpl38 PE=2 SV=2	112614	199967	157203	129394	134113	211479	154290	179569	215628	217382	233532	122995	172080	207029	155687	147216	124155	175516	130761	115163	115580	158879	155587	147296	179229	187551	199885	134489	172080	246865	159453	143261	0	0	0	0	0	0	0	0	0
D3ZY44	1	1	40.43	0.236041	1.40466	Control	Exercise	Protein Mrps2 OS=Rattus norvegicus GN=Mrps2 PE=3 SV=1	208827	293102	30930.1	238792	414541	248226	187787	190580	214444	8722.83	1721.98	218925	282241	133797	206251	224447	230228	257263	25727.6	212530	357257	186486	189365	156327	178244	7525.83	1473.88	239384	282241	159541	211240	218418	0	0	0	0	0	0	0	0	0
D3ZGP9;F1LUW1	6	6	432.94	0.239099	1.13962	Exercise	Control	Protein Dhrs7c OS=Rattus norvegicus GN=Dhrs7c PE=3 SV=1	3.99906e+06	3.84171e+06	3.2404e+06	4.64205e+06	3.7532e+06	3.52678e+06	4.50692e+06	2.21384e+06	4.64481e+06	2.81748e+06	5.09929e+06	4.74701e+06	4.37523e+06	4.5249e+06	3.24835e+06	4.41697e+06	4.40889e+06	3.37197e+06	2.69535e+06	4.13153e+06	3.23455e+06	2.64957e+06	4.54478e+06	1.81595e+06	3.86074e+06	2.43085e+06	4.3646e+06	5.19062e+06	4.37523e+06	5.39556e+06	3.32692e+06	4.29831e+06	4	3	2	4	2	2	4	1	3
F1LMU0;F1LSI0	94	8	8422.09	0.239487	1.38369	Control	Exercise	Myosin-4 OS=Rattus norvegicus GN=Myh4 PE=4 SV=1	1.47853e+08	1.57585e+08	2.15791e+08	1.66119e+08	2.07814e+08	1.2823e+08	1.05775e+08	3.971e+07	1.32742e+08	8.40938e+07	9.63384e+07	1.83356e+08	1.01792e+08	7.70302e+07	6.70022e+07	1.02398e+08	1.63005e+08	1.38317e+08	1.79494e+08	1.4785e+08	1.79096e+08	9.63361e+07	1.06664e+08	3.2573e+07	1.10335e+08	7.25539e+07	8.24581e+07	2.0049e+08	1.01792e+08	9.1852e+07	6.86229e+07	9.96474e+07	0	1	6	0	0	0	0	0	8
P13803	19	19	1715.42	0.242256	1.06209	Exercise	Control	Electron transfer flavoprotein subunit alpha, mitochondrial OS=Rattus norvegicus GN=Etfa PE=1 SV=4	6.28041e+08	6.44617e+08	5.96166e+08	5.50339e+08	5.55635e+08	6.46872e+08	6.36078e+08	7.38265e+08	5.71636e+08	7.6869e+08	6.59737e+08	5.69663e+08	6.69812e+08	6.84625e+08	6.80856e+08	7.01205e+08	6.92404e+08	5.65797e+08	4.95889e+08	4.89814e+08	4.78853e+08	4.85978e+08	6.41422e+08	6.05578e+08	4.7514e+08	6.63206e+08	5.64683e+08	6.22897e+08	6.69812e+08	8.16358e+08	6.97325e+08	6.82368e+08	29	32	30	29	25	28	31	37	28
G3V729	1	1	52.49	0.242604	1.25775	Control	Exercise	Eosinophil granule major basic protein OS=Rattus norvegicus GN=Prg2 PE=4 SV=1	66308.6	96459.8	222643	129806	156646	254429	160058	110895	48555.7	69573.8	306149	113578	104945	31153.9	131092	146845	73104	84665.2	185194	115531	135000	191146	161403	90964.3	40359.2	60026.4	262040	124192	104945	37148.3	134263	142900	0	0	0	0	0	0	0	0	0
Q6IFW1	7	1	352.83	0.242695	9.15943	Exercise	Control	Protein Krt33a OS=Rattus norvegicus GN=Krt33a PE=2 SV=1	1056.96	1914.44	2874.44	3619.62	1419.45	8697.71	1099.63	7521.6	1586.8	4114.03	1127.49	3475.91	230198	5623	4450.41	7755.47	1165.28	1680.35	2390.95	3221.54	1223.3	6534.36	1108.87	6169.76	1318.93	3549.48	965.043	3800.73	230198	6704.95	4558.06	7547.12	0	0	0	0	0	0	0	0	0
F1M1W1	1	1	71.15	0.243236	94.0837	Control	Exercise	Protein Bucs1 (Fragment) OS=Rattus norvegicus GN=Bucs1 PE=4 SV=1	68.9033	19366.9	0	58.0766	57.0834	0	292211	0	0	0	0	15.3772	106.048	0	0	3192.24	75.9647	16998.8	0	51.6896	49.1951	0	294666	0	0	0	0	16.8142	106.048	0	0	3106.48	0	0	0	0	0	0	1	0	0
D3ZAI6	1	1	37.32	0.243847	1.1446	Exercise	Control	Protein Nt5dc3 OS=Rattus norvegicus GN=Nt5dc3 PE=3 SV=1	390006	292779	299706	219921	251052	284471	290913	301795	265329	461892	377290	237910	351654	325340	392907	255325	429974	256979	249294	195735	216359	213716	293357	247554	220540	398508	322931	260143	351654	387940	402411	248466	0	0	0	0	0	0	0	0	0
Q6MGB5	1	1	51.95	0.245914	1.17012	Control	Exercise	Estradiol 17-beta-dehydrogenase 8 OS=Rattus norvegicus GN=Hsd17b8 PE=2 SV=1	227489	163853	254965	310407	198936	175656	313723	291692	120792	335664	179187	165281	309349	182633	179287	182959	250803	143818	212079	276270	171446	131966	316359	239267	100401	289602	153370	180726	309349	217775	183624	178044	0	0	0	0	0	0	1	1	0
Q68FX9	1	1	56.89	0.25229	1.18826	Exercise	Control	NAD-dependent protein deacylase sirtuin-5, mitochondrial OS=Rattus norvegicus GN=Sirt5 PE=2 SV=1	158893	33418	121433	71918.6	136509	103869	94258.3	222923	144191	180414	107775	87762.3	198736	136196	119765	145957	175177	29331.9	101008	64009.2	117645	78034.1	95050.3	182857	119851	155656	92246.9	95963.7	198736	162403	122662	142037	0	0	0	0	0	0	0	0	1
F1LNG8	1	1	105.37	0.252406	1.1757	Control	Exercise	Protein Mpv17l OS=Rattus norvegicus GN=Mpv17l PE=4 SV=1	843989	1.37589e+06	961531	522518	938303	1.06625e+06	784297	860340	931201	1.12785e+06	766886	515379	726909	887898	660070	638081	930483	1.20766e+06	799799	465054	808640	801046	790886	705713	774008	973080	656394	563541	726909	1.05874e+06	676036	620939	1	1	1	1	1	1	1	1	1
D3ZRF5	1	1	48.18	0.255425	1.11394	Exercise	Control	Protein Slc25a22 OS=Rattus norvegicus GN=Slc25a22 PE=3 SV=1	128665	187076	106278	111103	110042	172791	165217	197471	154074	195826	164645	131054	175389	143190	203344	145413	141851	164201	88401.4	98884.1	94835.7	129813	166605	161980	128065	168953	140924	143301	175389	170742	208262	141506	1	1	1	1	0	1	1	1	1
E9PT51	3	3	185.21	0.255791	1.11409	Exercise	Control	Uncharacterized protein OS=Rattus norvegicus PE=4 SV=1	938741	882031	753293	692040	1.0647e+06	1.3572e+06	985195	1.17563e+06	1.29859e+06	1.18664e+06	1.03074e+06	760585	1.19245e+06	999534	1.24029e+06	1.03547e+06	1.03494e+06	774180	626587	615932	917573	1.01963e+06	993472	964339	1.07938e+06	1.0238e+06	882237	831662	1.19245e+06	1.19186e+06	1.27029e+06	1.00766e+06	1	2	2	1	0	1	1	2	1
Q9ERS3;D3ZKP9;D3ZM25;P54290	30	30	1895.46	0.25606	1.06053	Exercise	Control	Voltage-dependent calcium channel subunit alpha-2-1 OS=Rattus norvegicus GN=Cacna2d1 PE=2 SV=1	5.5679e+07	5.60821e+07	5.97766e+07	5.15097e+07	5.34735e+07	6.03393e+07	6.12217e+07	6.59114e+07	7.07667e+07	5.51238e+07	6.88647e+07	5.40468e+07	6.13314e+07	6.59086e+07	6.19167e+07	5.41192e+07	6.13851e+07	4.92247e+07	4.9722e+07	4.58448e+07	4.60841e+07	4.53313e+07	6.17361e+07	5.40653e+07	5.88208e+07	4.75593e+07	5.89428e+07	5.90975e+07	6.13314e+07	7.85904e+07	6.34144e+07	5.26654e+07	21	22	20	22	24	22	22	20	24
D4A8P9	15	15	994.4	0.257475	1.05272	Exercise	Control	Uncharacterized protein OS=Rattus norvegicus PE=3 SV=1	1.45119e+07	1.21043e+07	1.46384e+07	1.23555e+07	1.42239e+07	1.32469e+07	1.30552e+07	1.26574e+07	1.40332e+07	1.71959e+07	1.27839e+07	1.34492e+07	1.42241e+07	1.43307e+07	1.35492e+07	1.28578e+07	1.59991e+07	1.06243e+07	1.21762e+07	1.09967e+07	1.22584e+07	9.95203e+06	1.31649e+07	1.03825e+07	1.16643e+07	1.48362e+07	1.0942e+07	1.4706e+07	1.42241e+07	1.70882e+07	1.3877e+07	1.25123e+07	9	5	8	6	6	5	7	6	7
Q6AYR6	1	1	52.31	0.25763	1.22165	Exercise	Control	Haloacid dehalogenase-like hydrolase domain-containing protein 2 OS=Rattus norvegicus GN=Hdhd2 PE=2 SV=1	89331.7	72000.4	132599	82384.1	90457.1	122377	67376.8	149997	91546.2	161484	163996	90853.2	109357	124221	176630	67198.6	98486.5	63196.5	110296	73323.8	77957	91938.2	67942.9	123038	76092.6	139324	140367	99343.4	109357	148123	180902	65393.4	0	0	0	0	0	0	0	0	0
F1MA49	3	3	166.93	0.260014	1.11032	Exercise	Control	Protein LOC100362962 OS=Rattus norvegicus GN=LOC100362962 PE=4 SV=1	711090	763820	932547	1.03254e+06	670279	812446	1.07655e+06	517153	783262	1.20715e+06	744537	801767	884260	922294	980255	911764	783964	670424	775690	918984	577654	610369	1.08559e+06	424206	651042	1.0415e+06	637265	876691	884260	1.09976e+06	1.00397e+06	887270	0	0	0	1	0	1	1	0	2
P05065;F1LP06;G3V900;P00884;P09117	21	21	1242.82	0.265786	1.2587	Exercise	Control	Fructose-bisphosphate aldolase A OS=Rattus norvegicus GN=Aldoa PE=1 SV=2	2.98471e+07	2.93127e+07	5.7274e+07	4.1906e+07	3.66165e+07	1.04643e+07	2.25476e+07	1.1123e+07	7.82239e+07	2.19275e+07	3.25048e+07	4.69606e+07	2.52661e+07	3.41527e+07	3.05474e+07	3.13613e+07	3.29058e+07	2.57285e+07	4.76404e+07	3.72973e+07	3.15565e+07	7.86158e+06	2.27371e+07	9.12387e+06	6.50192e+07	1.89184e+07	2.78216e+07	5.13491e+07	2.52661e+07	4.07243e+07	3.12863e+07	3.05188e+07	11	10	13	9	10	7	9	5	12
Q76MV3	2	2	112.2	0.266066	1.11714	Exercise	Control	Cytochrome C oxidase assembly protein COX17 OS=Rattus norvegicus GN=Cox17 PE=2 SV=1	1.34954e+06	1.39879e+06	1.7209e+06	1.74916e+06	1.32055e+06	1.70809e+06	1.32332e+06	1.31576e+06	1.42365e+06	2.34766e+06	1.80393e+06	1.61096e+06	1.70057e+06	1.7944e+06	1.1877e+06	1.40961e+06	1.48785e+06	1.22775e+06	1.43144e+06	1.55679e+06	1.13806e+06	1.28324e+06	1.33444e+06	1.07928e+06	1.18333e+06	2.0255e+06	1.54402e+06	1.7615e+06	1.70057e+06	2.13967e+06	1.21643e+06	1.37174e+06	2	1	1	1	1	1	1	1	2
B0BNM1	5	5	266.88	0.267361	1.06956	Exercise	Control	NAD(P)H-hydrate epimerase OS=Rattus norvegicus GN=Apoa1bp PE=2 SV=1	6.38929e+06	6.58172e+06	6.77941e+06	6.70075e+06	5.80741e+06	6.64038e+06	6.24334e+06	7.41216e+06	6.16412e+06	8.72672e+06	7.89754e+06	6.26588e+06	6.7184e+06	7.30413e+06	7.21878e+06	5.91474e+06	7.04407e+06	5.77694e+06	5.6391e+06	5.96383e+06	5.0049e+06	4.98874e+06	6.2958e+06	6.07999e+06	5.12357e+06	7.52918e+06	6.75967e+06	6.85142e+06	6.7184e+06	8.70956e+06	7.39339e+06	5.75584e+06	4	2	2	2	1	3	1	3	2
D3ZEB7	1	1	52.55	0.271675	1.15331	Exercise	Control	Mitochondrial ribosomal protein L11 OS=Rattus norvegicus GN=mrpl11 PE=3 SV=1	80430.4	84499.4	143025	50373.7	70047.1	85854.5	67041.3	105026	93068	128298	148694	82532.9	98633.7	84967.3	79145	76177.6	88673	74167.3	118968	44833.8	60367.4	64500.2	67604.6	86149.8	77357.6	110692	127270	90245.5	98633.7	101316	81059.3	74131.2	0	0	1	0	0	0	0	0	0
D4A0T0;D3ZC50	13	13	938.61	0.273998	1.04689	Exercise	Control	Protein Ndufb10 OS=Rattus norvegicus GN=Ndufb10 PE=4 SV=1	1.82561e+08	1.89862e+08	1.95445e+08	1.78219e+08	1.8519e+08	2.14043e+08	1.81402e+08	2.07428e+08	1.94009e+08	2.29596e+08	2.07846e+08	1.84141e+08	1.88995e+08	2.158e+08	2.08854e+08	1.76841e+08	2.0127e+08	1.66646e+08	1.62571e+08	1.58619e+08	1.59599e+08	1.60805e+08	1.82926e+08	1.70147e+08	1.61259e+08	1.9809e+08	1.779e+08	2.01349e+08	1.88995e+08	2.57324e+08	2.13906e+08	1.7209e+08	13	13	14	13	12	14	13	18	14
Q64578	47	27	4052.52	0.275486	1.09609	Exercise	Control	Sarcoplasmic/endoplasmic reticulum calcium ATPase 1 OS=Rattus norvegicus GN=Atp2a1 PE=2 SV=1	3.31726e+08	3.73489e+08	3.19761e+08	4.60936e+08	3.55968e+08	3.60517e+08	3.67377e+08	2.24486e+08	3.79446e+08	3.30043e+08	4.83109e+08	4.23106e+08	3.73205e+08	4.04625e+08	3.04604e+08	3.64626e+08	3.65722e+08	3.27821e+08	2.65976e+08	4.10244e+08	3.06777e+08	2.70847e+08	3.70464e+08	1.84139e+08	3.15393e+08	2.84752e+08	4.13504e+08	4.62646e+08	3.73205e+08	4.82481e+08	3.11972e+08	3.54831e+08	35	43	31	50	30	35	38	28	31
Q8R4Z9	1	1	82.77	0.276725	1.16456	Control	Exercise	Mitofusin-1 OS=Rattus norvegicus GN=Mfn1 PE=1 SV=1	140240	254131	224344	275170	153587	144072	168818	143784	149368	193203	159872	152462	147414	217240	148728	123309	154612	223057	186609	244908	132363	108238	170236	117942	124154	166690	136838	166710	147414	259041	152326	119996	0	0	0	0	0	0	0	1	0
F1LRZ4	11	11	560.8	0.276867	1.08689	Exercise	Control	Uncharacterized protein OS=Rattus norvegicus GN=Nlrx1 PE=4 SV=1	4.74648e+06	6.38966e+06	4.04044e+06	4.09321e+06	4.70174e+06	6.40427e+06	4.52792e+06	7.50492e+06	5.65541e+06	6.91112e+06	5.94883e+06	5.0555e+06	5.31089e+06	5.91307e+06	6.22949e+06	5.06923e+06	5.23291e+06	5.60836e+06	3.36083e+06	3.64305e+06	4.05202e+06	4.81136e+06	4.56596e+06	6.15607e+06	4.70075e+06	5.96274e+06	5.09173e+06	5.52793e+06	5.31089e+06	7.05084e+06	6.38017e+06	4.93305e+06	3	4	2	1	0	4	2	7	5
P51638	1	1	97.48	0.278776	1.12792	Exercise	Control	Caveolin-3 OS=Rattus norvegicus GN=Cav3 PE=1 SV=1	2.75084e+06	1.87395e+06	2.56696e+06	1.74895e+06	1.68873e+06	1.62488e+06	2.34142e+06	2.10685e+06	3.12347e+06	2.45669e+06	2.18937e+06	1.8679e+06	2.31923e+06	3.12832e+06	1.96486e+06	1.78934e+06	3.03275e+06	1.64481e+06	2.13519e+06	1.55661e+06	1.45537e+06	1.22073e+06	2.36109e+06	1.72819e+06	2.59621e+06	2.11957e+06	1.87393e+06	2.04245e+06	2.31923e+06	3.73026e+06	2.01239e+06	1.74127e+06	1	0	0	1	1	0	2	1	1
F1LTR6	2	2	161.85	0.28057	1.11414	Control	Exercise	Protein RGD1565119 (Fragment) OS=Rattus norvegicus GN=RGD1565119 PE=3 SV=1	308952	413668	252465	304140	359962	402482	442801	427562	282687	328954	301377	262979	281315	434044	365820	356536	340614	363086	209999	270691	310219	302374	446522	350717	234968	283813	257955	287554	281315	517561	374668	346958	0	0	1	0	0	0	1	0	0
D3Z8J5	1	1	46.95	0.28144	1.10062	Exercise	Control	Protein Sco1 OS=Rattus norvegicus GN=Sco1 PE=4 SV=1	61201.8	92538.6	98204.7	61903.8	104410	95131.3	70895.6	92471	77232.7	77132.7	99696.7	81588.8	110151	108221	105633	85193.3	67473.9	81223.5	81686.4	55095.8	89981.6	71469.6	71491.3	75851.4	64195.3	66548.1	85332.5	89213.3	110151	129045	108189	82904.7	1	0	1	0	0	0	0	1	1
F1M8T5	1	1	40.93	0.283728	1.15891	Exercise	Control	Protein Lrp1b (Fragment) OS=Rattus norvegicus GN=Lrp1b PE=4 SV=1	173612	105422	137770	101521	13391.1	80765.9	76264.1	117873	109724	120810	157402	128347	106325	89881.2	115514	106794	191404	92531.1	114597	90355.9	11540.6	60677.3	76904.8	96688.3	91201.6	104231	134723	140341	106325	107176	118308	103926	1	0	1	0	0	0	0	0	1
P07895	10	9	903.09	0.286236	1.04411	Exercise	Control	Superoxide dismutase [Mn], mitochondrial OS=Rattus norvegicus GN=Sod2 PE=1 SV=2	2.60218e+08	2.30952e+08	2.36185e+08	1.93494e+08	2.27247e+08	2.58605e+08	2.36216e+08	2.20422e+08	2.30524e+08	2.75375e+08	2.59619e+08	2.37808e+08	2.40342e+08	2.28695e+08	2.44176e+08	2.28985e+08	2.86886e+08	2.02712e+08	1.96458e+08	1.72214e+08	1.95844e+08	1.94283e+08	2.38201e+08	1.80806e+08	1.9161e+08	2.37586e+08	2.22213e+08	2.60031e+08	2.40342e+08	2.72699e+08	2.50083e+08	2.22834e+08	18	14	15	12	13	9	13	13	16
P20788	11	11	1015.41	0.286464	1.05779	Exercise	Control	Cytochrome b-c1 complex subunit Rieske, mitochondrial OS=Rattus norvegicus GN=Uqcrfs1 PE=1 SV=2	4.15967e+08	4.36003e+08	3.96693e+08	3.68793e+08	3.6536e+08	4.37137e+08	3.32504e+08	4.16947e+08	3.98492e+08	5.08233e+08	4.31069e+08	3.59639e+08	3.90244e+08	4.15303e+08	4.46343e+08	4.03242e+08	4.58596e+08	3.82691e+08	3.29968e+08	3.28234e+08	3.14872e+08	3.28409e+08	3.35297e+08	3.4201e+08	3.31224e+08	4.3849e+08	3.68961e+08	3.93247e+08	3.90244e+08	4.95214e+08	4.57139e+08	3.92409e+08	21	26	23	22	20	21	22	25	21
P29266	14	14	1300.43	0.290094	1.0706	Exercise	Control	3-hydroxyisobutyrate dehydrogenase, mitochondrial OS=Rattus norvegicus GN=Hibadh PE=1 SV=3	1.04103e+08	1.12239e+08	9.69453e+07	8.54687e+07	8.65786e+07	1.22233e+08	1.05601e+08	1.01557e+08	9.74903e+07	1.32255e+08	9.50494e+07	1.01801e+08	1.04454e+08	1.22252e+08	1.2064e+08	9.82993e+07	1.14772e+08	9.85148e+07	8.06388e+07	7.60691e+07	7.46145e+07	9.18306e+07	1.06488e+08	8.33044e+07	8.10333e+07	1.14106e+08	8.13548e+07	1.11314e+08	1.04454e+08	1.45776e+08	1.23558e+08	9.56586e+07	15	16	17	17	15	15	17	16	16
G3V9N1	1	1	52.7	0.290794	1.07012	Exercise	Control	RCG21137 OS=Rattus norvegicus GN=Pgam5 PE=4 SV=1	135971	102417	90095.9	149436	105430	101216	97015.6	125781	120535	123569	98598.5	133565	120392	124973	117413	131939	149905	89894.3	74941.5	133001	90860.7	76041.3	97830.7	103174	100188	106612	84392.5	146047	120392	149019	120253	128395	0	0	0	1	1	0	0	0	1
Q62636	1	1	45.2	0.291165	1.17444	Exercise	Control	Ras-related protein Rap-1b OS=Rattus norvegicus GN=Rap1b PE=2 SV=2	30730.1	116694	102263	80865.1	109786	175463	112769	108143	185402	160666	93736.7	95203.3	104400	114270	96706.9	132281	33879.4	102426	85062.1	71971.8	94614.8	131821	113717	88706.5	154105	138618	80231.3	104100	104400	136258	99046.1	128728	0	0	0	0	0	0	0	0	0
B2RZ72	1	1	36.45	0.291268	1.12579	Control	Exercise	Actin related protein 2/3 complex, subunit 4 (Predicted), isoform CRA_a OS=Rattus norvegicus GN=Arpc4 PE=2 SV=1	197810	191869	199540	179997	177108	123972	142809	135505	212307	130523	225380	91600.8	127825	79114.7	162567	168609	218082	168408	165977	160201	152633	93136.6	144009	111151	176468	112612	192907	100161	127825	94337.6	166499	164080	0	0	1	0	0	0	0	0	0
D3ZT90	12	10	615.9	0.291917	1.12351	Exercise	Control	Glutaryl-Coenzyme A dehydrogenase (Predicted) OS=Rattus norvegicus GN=Gcdh PE=3 SV=1	7.71655e+06	7.20438e+06	8.20134e+06	7.49337e+06	6.5642e+06	7.68806e+06	1.11505e+07	8.01379e+06	7.85483e+06	1.28093e+07	7.51439e+06	6.72644e+06	8.59862e+06	1.06448e+07	1.0438e+07	7.35452e+06	8.50736e+06	6.32346e+06	6.82185e+06	6.66927e+06	5.6571e+06	5.77583e+06	1.12442e+07	6.57349e+06	6.52889e+06	1.10515e+07	6.43173e+06	7.35502e+06	8.59862e+06	1.2693e+07	1.06905e+07	7.15695e+06	3	3	5	3	2	2	5	5	1
A9UMV2	1	1	45.28	0.292357	1.09756	Exercise	Control	Mitochondrial ribosomal protein S24 OS=Rattus norvegicus GN=Mrps24 PE=2 SV=1	136286	142618	110173	137703	167674	267674	204877	201823	163606	214101	186645	172110	229879	156813	179503	199708	150253	125179	91641.3	122559	144503	201097	206599	165550	135988	184721	159753	188194	229879	186986	183845	194343	0	1	0	1	1	1	1	1	1
Q2IBC6	1	1	44.48	0.294517	1.08381	Exercise	Control	Caveolin OS=Rattus norvegicus GN=Cav1 PE=2 SV=1	5.72703e+06	4.45108e+06	3.39079e+06	4.84004e+06	3.95574e+06	4.14084e+06	4.84889e+06	3.96837e+06	4.42882e+06	5.84155e+06	5.5276e+06	4.12457e+06	4.56116e+06	5.43274e+06	4.15011e+06	4.21678e+06	6.31394e+06	3.90683e+06	2.82045e+06	4.30775e+06	3.4091e+06	3.11091e+06	4.88963e+06	3.25514e+06	3.68121e+06	5.03994e+06	4.73119e+06	4.51001e+06	4.56116e+06	6.47809e+06	4.25049e+06	4.1035e+06	0	0	1	0	0	0	0	0	0
B2RYT7	3	3	150.92	0.297504	1.11673	Control	Exercise	Haloacid dehalogenase-like hydrolase domain containing 3 OS=Rattus norvegicus GN=Hdhd3 PE=2 SV=1	291830	255131	237101	337273	242936	377010	418395	322840	261376	290431	339661	262008	199504	301278	244462	324299	321737	223935	197220	300181	209365	283238	421911	264817	217254	250576	290723	286492	199504	359249	250375	315587	1	1	2	0	0	2	2	0	2
D3ZLK9	1	1	41.53	0.306582	1.24678	Exercise	Control	ATP-dependent (S)-NAD(P)H-hydrate dehydratase OS=Rattus norvegicus GN=Carkd PE=4 SV=1	159493	193721	0	162216	140796	159146	107041	222893	198683	189935	229520	158097	146715	168446	181754	154797	175838	170034	0	144376	121340	119562	107941	182833	165144	163871	196451	172871	146715	200858	186150	150638	0	0	0	0	0	0	0	0	0
P07483	5	5	323.58	0.308651	1.1199	Control	Exercise	Fatty acid-binding protein, heart OS=Rattus norvegicus GN=Fabp3 PE=1 SV=2	8.43822e+06	8.09058e+06	7.31393e+06	7.13197e+06	6.49312e+06	4.74388e+06	6.81023e+06	4.68027e+06	7.40956e+06	5.62958e+06	4.81704e+06	7.90745e+06	5.01361e+06	5.55091e+06	5.1715e+06	6.45324e+06	9.30298e+06	7.10131e+06	6.08371e+06	6.34762e+06	5.59585e+06	3.56395e+06	6.86745e+06	3.8391e+06	6.15878e+06	4.85705e+06	4.12301e+06	8.64639e+06	5.01361e+06	6.61899e+06	5.29659e+06	6.27988e+06	6	5	5	4	4	2	3	4	5
D3ZIQ3	2	2	72.96	0.309559	1.13254	Exercise	Control	Protein Fitm1 OS=Rattus norvegicus GN=Fitm1 PE=4 SV=1	88932.3	72874	84663.7	91948.4	64558	101447	90793.9	43147.8	118928	84501.8	89717.9	90443.8	98886.9	79036.5	55776.2	105681	98046.2	63963.4	70423	81836.3	55636.8	76214.7	91556.7	35392.9	98851.9	72905.9	76791.5	98895.7	98886.9	94244.4	57125.3	102842	0	0	0	0	0	0	0	0	0
D4A9P9	6	6	449.29	0.310142	1.08387	Exercise	Control	Gup1, glycerol uptake/transporter homolog (Yeast) (Predicted) OS=Rattus norvegicus GN=Hhatl PE=4 SV=1	5.21999e+06	5.2085e+06	6.47834e+06	6.2562e+06	5.39063e+06	5.09154e+06	7.25362e+06	3.41021e+06	6.28284e+06	5.5912e+06	7.13454e+06	6.79302e+06	6.17923e+06	5.54098e+06	5.00072e+06	5.50289e+06	5.75494e+06	4.57163e+06	5.38867e+06	5.56816e+06	4.64571e+06	3.82514e+06	7.31456e+06	2.7973e+06	5.22226e+06	4.82394e+06	6.10661e+06	7.42783e+06	6.17923e+06	6.60715e+06	5.12168e+06	5.35507e+06	4	3	6	6	6	4	5	5	3
Q63081	1	1	68.33	0.311431	1.16414	Exercise	Control	Protein disulfide-isomerase A6 OS=Rattus norvegicus GN=Pdia6 PE=1 SV=2	194851	209296	144143	218624	126119	49910.7	207679	50739.4	175513	169212	256183	223741	180744	155904	97701.7	139560	214820	183704	119898	194581	108691	37496.6	209424	41620.1	145886	145992	219272	244650	180744	185902	100065	135811	0	0	0	1	0	0	1	0	1
Q6AYQ4	2	2	144.53	0.311637	1.13198	Exercise	Control	Transmembrane protein 109 OS=Rattus norvegicus GN=Tmem109 PE=2 SV=1	648729	559540	581661	1.12806e+06	1.33387e+06	1.50564e+06	1.22826e+06	943911	1.12306e+06	1.17556e+06	1.17962e+06	867841	809348	1.00043e+06	1.17173e+06	1.64865e+06	715212	491122	483824	1.004e+06	1.14955e+06	1.13115e+06	1.23858e+06	774264	933484	1.01424e+06	1.00966e+06	948941	809348	1.19293e+06	1.20007e+06	1.60436e+06	2	1	1	1	2	1	1	1	2
Q32PX9	1	1	49.01	0.312838	1.11489	Control	Exercise	Lactation elevated protein 1 OS=Rattus norvegicus GN=Lace1 PE=2 SV=1	324644	207436	164031	244767	206208	201570	194772	224437	131349	244377	152720	199217	229342	229259	170052	229373	357915	182071	136440	217849	177713	151434	196409	184099	109177	210842	130716	217834	229342	273372	174165	223211	1	1	0	0	0	0	0	0	0
B0BN86;D4ABL1	4	4	249.12	0.313223	1.06228	Exercise	Control	Transmembrane protein 11, mitochondrial OS=Rattus norvegicus GN=Tmem11 PE=2 SV=1	4.49445e+06	4.51577e+06	3.60364e+06	3.95258e+06	2.95775e+06	3.65378e+06	3.77236e+06	4.21269e+06	4.03027e+06	4.63513e+06	4.48063e+06	3.35517e+06	3.98062e+06	4.44407e+06	4.27759e+06	3.90045e+06	4.95505e+06	3.96361e+06	2.9975e+06	3.51789e+06	2.54902e+06	2.74498e+06	3.80406e+06	3.45555e+06	3.34994e+06	3.99907e+06	3.83506e+06	3.66871e+06	3.98062e+06	5.29918e+06	4.38106e+06	3.79567e+06	1	3	2	4	2	2	4	2	4
B2RZD6	5	5	399.14	0.313616	1.08707	Exercise	Control	Ndufa4 protein OS=Rattus norvegicus GN=Ndufa4 PE=4 SV=1	2.62477e+08	2.80829e+08	2.63495e+08	2.34264e+08	2.71054e+08	3.44889e+08	2.69457e+08	3.43241e+08	2.94486e+08	3.70041e+08	3.88035e+08	2.54553e+08	3.17801e+08	3.25459e+08	2.71168e+08	2.45792e+08	2.89376e+08	2.4649e+08	2.19175e+08	2.085e+08	2.33597e+08	2.59106e+08	2.71721e+08	2.81551e+08	2.44775e+08	3.19262e+08	3.32127e+08	2.78341e+08	3.17801e+08	3.88082e+08	2.77728e+08	2.39189e+08	5	6	6	8	9	8	9	6	6
P07756;D3ZVV9;F1M9N2	30	30	1797.85	0.314579	4.66237	Control	Exercise	Carbamoyl-phosphate synthase [ammonia], mitochondrial OS=Rattus norvegicus GN=Cps1 PE=1 SV=1	3.27411e+06	2.00456e+07	2.31328e+06	2.24417e+06	1.8182e+06	1.91454e+06	8.33975e+07	1.65083e+06	3.11678e+06	2.2358e+06	1.93375e+06	2.03081e+06	1.65765e+06	2.30861e+06	1.01642e+07	1.57362e+06	3.60965e+06	1.75945e+07	1.92418e+06	1.99737e+06	1.56694e+06	1.43835e+06	8.40982e+07	1.35413e+06	2.59064e+06	1.92899e+06	1.65514e+06	2.22059e+06	1.65765e+06	2.75282e+06	1.04101e+07	1.53135e+06	0	11	0	0	0	0	34	0	0
P16409	9	6	550.54	0.317346	1.2513	Control	Exercise	Myosin light chain 3 OS=Rattus norvegicus GN=Myl3 PE=1 SV=2	1.34819e+07	1.09355e+07	1.27226e+07	1.84114e+07	1.5901e+07	5.98713e+06	9.41316e+06	5.84418e+06	1.12205e+07	5.74208e+06	6.23171e+06	1.32452e+07	1.08809e+07	7.81367e+06	7.22109e+06	1.17253e+07	1.48635e+07	9.59839e+06	1.05826e+07	1.63866e+07	1.37037e+07	4.49798e+06	9.49225e+06	4.79382e+06	9.32643e+06	4.95412e+06	5.33385e+06	1.44829e+07	1.08809e+07	9.31714e+06	7.39575e+06	1.14104e+07	5	5	5	6	5	3	4	4	4
B0K036	1	1	46.9	0.320951	1.1278	Exercise	Control	Succinate dehydrogenase assembly factor 1, mitochondrial OS=Rattus norvegicus GN=Sdhaf1 PE=3 SV=1	115105	91411.9	127986	114077	113650	90906.3	51411.2	163765	86462.6	176872	124094	139114	100274	121435	117404	113631	126901	80234.5	106459	101532	97944.8	68295.5	51843.2	134332	71867.2	152601	106215	152115	100274	144801	120244	110579	0	0	1	0	0	0	0	0	0
F1M5N4;D3ZI58;D3ZJH9;F1LUQ4	25	25	1507.35	0.321085	1.07084	Exercise	Control	Malic enzyme (Fragment) OS=Rattus norvegicus GN=Me3 PE=3 SV=1	6.7204e+07	6.45002e+07	6.30155e+07	5.27286e+07	5.71612e+07	7.72255e+07	5.96513e+07	7.3243e+07	6.77183e+07	8.28835e+07	5.70933e+07	5.69108e+07	7.30646e+07	7.87206e+07	6.89105e+07	6.5891e+07	7.40912e+07	5.66134e+07	5.24161e+07	4.69297e+07	4.92622e+07	5.80175e+07	6.01524e+07	6.00792e+07	5.62871e+07	7.15097e+07	4.88674e+07	6.22291e+07	7.30646e+07	9.38677e+07	7.05774e+07	6.41209e+07	18	16	17	17	13	19	19	20	15
D3ZX08	1	1	48.29	0.322544	1.15324	Exercise	Control	Alanine--tRNA ligase, mitochondrial OS=Rattus norvegicus GN=Aars2 PE=3 SV=1	244871	215068	189357	195572	242107	185609	203048	249264	284741	319532	219905	129038	308881	230932	280081	216118	269966	188771	157506	174064	208651	139443	204754	204464	236675	275683	188221	141096	308881	275367	286856	210313	0	0	0	0	0	0	0	0	0
B2GV75	5	5	245.72	0.323047	1.07148	Control	Exercise	D2hgdh protein OS=Rattus norvegicus GN=D2hgdh PE=2 SV=1	3.30765e+06	3.0202e+06	3.34779e+06	2.84739e+06	2.49911e+06	2.84205e+06	2.57413e+06	3.04087e+06	3.95359e+06	2.40232e+06	2.88873e+06	2.2494e+06	2.08649e+06	2.58114e+06	3.14108e+06	2.61013e+06	3.64662e+06	2.65091e+06	2.78469e+06	2.53425e+06	2.15377e+06	2.13516e+06	2.59576e+06	2.49434e+06	3.2862e+06	2.07266e+06	2.47253e+06	2.45961e+06	2.08649e+06	3.07779e+06	3.21706e+06	2.54001e+06	1	2	2	0	1	1	0	3	2
D3ZR38	1	1	73.39	0.323312	1.11791	Exercise	Control	Protein Map1d OS=Rattus norvegicus GN=Map1d PE=4 SV=1	132120	95167.3	158366	96953.9	167551	186413	166464	236301	151071	247897	200580	158966	126675	175228	168864	156188	145660	83530.7	131729	86291.3	144397	140047	167863	193831	125570	213879	171681	173821	126675	208945	172949	151992	0	0	0	0	1	1	0	1	0
G3V7K1	12	12	652.12	0.328576	1.36505	Control	Exercise	Myomesin 2 OS=Rattus norvegicus GN=Myom2 PE=4 SV=1	4.59501e+06	3.80957e+06	3.92405e+06	4.53827e+06	6.13988e+06	2.06031e+06	2.14209e+06	1.0193e+06	4.31234e+06	1.51463e+06	2.30667e+06	3.09354e+06	2.88348e+06	1.44946e+06	1.59812e+06	3.52121e+06	5.06591e+06	3.34376e+06	3.26402e+06	4.03917e+06	5.29142e+06	1.54786e+06	2.16009e+06	836106	3.58439e+06	1.30678e+06	1.97433e+06	3.38263e+06	2.88348e+06	1.72836e+06	1.63678e+06	3.42662e+06	10	3	1	6	7	0	0	0	4
G3V734	13	13	861.44	0.328934	1.16952	Control	Exercise	2,4-dienoyl CoA reductase 1, mitochondrial, isoform CRA_a OS=Rattus norvegicus GN=Decr1 PE=4 SV=1	4.744e+07	3.78101e+07	4.95547e+07	1.87416e+07	5.75103e+07	3.23075e+07	2.98358e+07	4.43557e+07	1.70897e+07	3.06033e+07	1.79558e+07	2.29849e+07	6.42407e+07	5.96868e+07	2.56127e+07	3.33521e+07	5.23017e+07	3.31868e+07	4.12195e+07	1.66805e+07	4.95631e+07	2.42718e+07	3.00865e+07	3.63837e+07	1.42048e+07	2.64037e+07	1.53687e+07	2.51328e+07	6.42407e+07	7.11715e+07	2.62323e+07	3.24561e+07	10	8	10	6	10	7	7	7	5
Q9R063;D3ZEN5	7	7	666.19	0.32951	1.0529	Exercise	Control	Peroxiredoxin-5, mitochondrial OS=Rattus norvegicus GN=Prdx5 PE=1 SV=1	1.23443e+08	1.25241e+08	1.16529e+08	1.16411e+08	1.06324e+08	1.35686e+08	1.24439e+08	1.3406e+08	1.2325e+08	1.56093e+08	1.18815e+08	1.15635e+08	1.20028e+08	1.39816e+08	1.42322e+08	1.18133e+08	1.36094e+08	1.09927e+08	9.69285e+07	1.03609e+08	9.16312e+07	1.01937e+08	1.25484e+08	1.09966e+08	1.02445e+08	1.34673e+08	1.01696e+08	1.26441e+08	1.20028e+08	1.66718e+08	1.45764e+08	1.14959e+08	14	9	10	13	10	9	10	10	11
P97615;F8WFV4	2	2	211.5	0.331092	1.06919	Control	Exercise	Thioredoxin, mitochondrial OS=Rattus norvegicus GN=Txn2 PE=2 SV=1	1.5183e+07	1.45801e+07	1.88715e+07	1.58822e+07	1.5486e+07	2.15215e+07	1.51217e+07	1.91278e+07	1.75662e+07	1.77449e+07	1.68921e+07	1.46763e+07	1.48484e+07	1.32613e+07	1.59873e+07	1.60105e+07	1.6739e+07	1.27973e+07	1.56973e+07	1.41355e+07	1.3346e+07	1.61685e+07	1.52488e+07	1.569e+07	1.46009e+07	1.53099e+07	1.44583e+07	1.60478e+07	1.48484e+07	1.5813e+07	1.6374e+07	1.55804e+07	3	2	3	3	3	3	2	2	3
F1LRE1;F1LQY0	3	3	168.19	0.334397	1.16649	Control	Exercise	Uncharacterized protein (Fragment) OS=Rattus norvegicus GN=Gsr PE=3 SV=1	3.35718e+06	5.27506e+06	2.4547e+06	3.44891e+06	3.26855e+06	6.01739e+06	3.79775e+06	2.70872e+06	3.11952e+06	4.00665e+06	2.57964e+06	2.35664e+06	2.30175e+06	4.98084e+06	2.85803e+06	3.79641e+06	3.70123e+06	4.63005e+06	2.04182e+06	3.06961e+06	2.81688e+06	4.52071e+06	3.82966e+06	2.22189e+06	2.59293e+06	3.45683e+06	2.20797e+06	2.57687e+06	2.30175e+06	5.93923e+06	2.92716e+06	3.69442e+06	2	0	2	0	2	1	0	0	1
P11598	2	2	93.33	0.335057	1.10361	Exercise	Control	Protein disulfide-isomerase A3 OS=Rattus norvegicus GN=Pdia3 PE=1 SV=2	267364	321495	281417	396296	336561	310074	466005	254711	305302	507798	398194	430031	326560	326397	328215	284328	294764	282184	234082	352713	290052	232950	469920	208932	253765	438115	340823	470217	326560	389200	336154	276690	0	0	0	1	0	0	1	0	0
P32551	22	22	1835.91	0.33712	1.06416	Exercise	Control	Cytochrome b-c1 complex subunit 2, mitochondrial OS=Rattus norvegicus GN=Uqcrc2 PE=1 SV=2	6.13322e+08	6.49237e+08	6.05434e+08	4.98046e+08	5.51499e+08	6.63848e+08	5.73465e+08	6.64562e+08	6.03505e+08	8.07004e+08	6.24057e+08	5.31315e+08	5.63136e+08	6.78431e+08	7.07571e+08	6.13598e+08	6.76176e+08	5.69851e+08	5.03599e+08	4.43273e+08	4.75288e+08	4.98731e+08	5.78283e+08	5.45122e+08	5.01629e+08	6.96262e+08	5.34144e+08	5.80966e+08	5.63136e+08	8.08971e+08	7.24686e+08	5.97115e+08	27	31	28	27	28	32	29	34	30
P11232	2	2	118.04	0.337356	1.11079	Control	Exercise	Thioredoxin OS=Rattus norvegicus GN=Txn PE=1 SV=2	989677	871188	696374	862506	1.07512e+06	656525	716031	579012	664340	608282	714898	825107	710023	586800	563405	1.13063e+06	1.0911e+06	764663	579242	767651	926552	493230	722047	474948	552195	524810	611897	902214	710023	699709	577033	1.10026e+06	0	0	0	0	1	1	0	0	0
D3ZCE4	1	1	40.47	0.338572	1.18147	Exercise	Control	Telomeric repeat-binding factor 2-interacting protein 1 OS=Rattus norvegicus GN=Terf2ip PE=4 SV=1	634619	620490	712699	980045	890175	1.08854e+06	1.50484e+06	1.90072e+06	583132	941604	981414	1.1812e+06	1.23761e+06	1.6544e+06	1.61187e+06	1.65296e+06	699656	544619	592821	872263	767163	817788	1.51749e+06	1.55911e+06	484696	812391	840013	1.29159e+06	1.23761e+06	1.97273e+06	1.65086e+06	1.60856e+06	0	0	0	0	0	1	1	1	0
Q68FZ8;D3Z9A2	18	3	1531.93	0.338878	1.09266	Exercise	Control	Propionyl coenzyme A carboxylase, beta polypeptide OS=Rattus norvegicus GN=Pccb PE=2 SV=1	4.88266e+06	5.4529e+06	4.41788e+06	5.16512e+06	4.22262e+06	6.60293e+06	6.15701e+06	7.15324e+06	4.31114e+06	7.59233e+06	5.04484e+06	5.9828e+06	5.82536e+06	6.1509e+06	7.02785e+06	6.20131e+06	5.38304e+06	4.78615e+06	3.67478e+06	4.59708e+06	3.6391e+06	4.96061e+06	6.20874e+06	5.8676e+06	3.5834e+06	6.55047e+06	4.31799e+06	6.54189e+06	5.82536e+06	7.33442e+06	7.19784e+06	6.03472e+06	2	2	2	3	3	2	3	2	2
O08776	2	2	121.3	0.344928	1.08375	Control	Exercise	NADH dehydrogenase [ubiquinone] 1 alpha subcomplex assembly factor 3 OS=Rattus norvegicus GN=Ndufaf3 PE=2 SV=1	672421	463076	597757	467430	465497	600891	570814	709161	664334	599628	541594	551458	468297	445787	450317	474253	741332	406454	497213	416024	401171	451434	575610	581705	552190	517343	463562	602992	468297	531563	461210	461513	1	0	1	1	1	1	1	1	1
B0BNJ9;Q924P2	2	2	139.77	0.346088	1.0965	Control	Exercise	RCG44002, isoform CRA_a OS=Rattus norvegicus GN=Tmem14c PE=4 SV=1	2.1302e+07	2.23178e+07	1.98502e+07	1.34435e+07	1.87226e+07	1.77991e+07	2.05181e+07	1.34256e+07	2.12349e+07	1.97691e+07	1.59037e+07	1.65896e+07	1.47931e+07	1.78331e+07	1.46115e+07	1.3673e+07	2.34851e+07	1.95889e+07	1.65113e+07	1.1965e+07	1.61354e+07	1.3372e+07	2.06905e+07	1.10126e+07	1.76503e+07	1.70563e+07	1.36123e+07	1.81399e+07	1.47931e+07	2.12645e+07	1.4965e+07	1.33056e+07	3	3	2	3	1	3	1	2	2
Q6IFU8;D3ZXA9	7	1	364.55	0.349328	11.1472	Control	Exercise	Keratin, type I cytoskeletal 17 OS=Rattus norvegicus GN=Krt17 PE=2 SV=1	19122.5	36638.9	12471	51724.6	2.1565e+06	13540.5	32654.9	18751.6	66545.7	20949.4	19004.3	14802.2	15969	17153.9	14656.3	40962.8	21082.3	32158.9	10373.4	46036.1	1.85849e+06	10172.6	32929.2	15381.4	55312.4	18074.6	16266.2	16185.5	15969	20454.6	15010.8	39862.4	0	0	0	0	1	0	0	0	0
D3ZXF9	4	4	197.25	0.350436	1.07779	Exercise	Control	Protein Mrpl12 OS=Rattus norvegicus GN=Mrpl12 PE=4 SV=1	2.17981e+06	2.2697e+06	2.38653e+06	1.987e+06	1.76561e+06	2.42801e+06	2.09733e+06	2.6862e+06	2.17201e+06	3.10048e+06	2.76165e+06	1.99456e+06	2.37173e+06	2.44396e+06	2.43396e+06	1.90645e+06	2.4032e+06	1.99217e+06	1.98511e+06	1.76847e+06	1.52162e+06	1.8241e+06	2.11495e+06	2.20341e+06	1.80536e+06	2.67501e+06	2.36376e+06	2.18095e+06	2.37173e+06	2.91422e+06	2.49283e+06	1.85524e+06	2	2	2	1	0	0	1	1	2
Q5XIM0	6	6	495.09	0.351295	1.05429	Exercise	Control	BCS1-like (Yeast) OS=Rattus norvegicus GN=Bcs1l PE=2 SV=1	5.71439e+06	5.11248e+06	5.32921e+06	5.34714e+06	5.07348e+06	6.1038e+06	6.52956e+06	6.16458e+06	5.69566e+06	6.53122e+06	6.73749e+06	4.67428e+06	5.92057e+06	6.55311e+06	5.96678e+06	5.75914e+06	6.30001e+06	4.48735e+06	4.43282e+06	4.75908e+06	4.37238e+06	4.58563e+06	6.58442e+06	5.05664e+06	4.7342e+06	5.63496e+06	5.76677e+06	5.11109e+06	5.92057e+06	7.81402e+06	6.1111e+06	5.60442e+06	5	3	5	5	5	5	5	5	7
F1LQ44	13	11	806.27	0.351536	1.07271	Exercise	Control	Protein Pdhx OS=Rattus norvegicus GN=Pdhx PE=3 SV=1	2.46688e+07	2.4079e+07	2.38605e+07	1.8809e+07	2.38935e+07	2.96867e+07	2.54027e+07	2.72732e+07	2.48779e+07	3.29078e+07	2.29897e+07	2.42305e+07	2.56393e+07	3.24181e+07	2.69609e+07	2.20219e+07	2.71969e+07	2.11348e+07	1.98471e+07	1.67404e+07	2.05917e+07	2.23028e+07	2.56162e+07	2.23715e+07	2.06784e+07	2.8392e+07	1.96774e+07	2.64948e+07	2.56393e+07	3.86559e+07	2.7613e+07	2.14303e+07	7	7	6	4	6	9	7	10	7
Q5XI78;D3ZFA6;D3ZQD3;F8WGA5	52	52	3902.43	0.352084	1.06245	Exercise	Control	2-oxoglutarate dehydrogenase, mitochondrial OS=Rattus norvegicus GN=Ogdh PE=1 SV=1	6.72419e+08	6.23571e+08	5.84648e+08	5.02153e+08	5.48896e+08	6.61451e+08	5.15437e+08	5.76987e+08	5.89649e+08	8.17303e+08	5.74823e+08	5.76979e+08	6.14441e+08	5.82286e+08	6.79877e+08	5.4281e+08	7.41329e+08	5.47324e+08	4.86309e+08	4.46928e+08	4.73045e+08	4.96931e+08	5.19768e+08	4.73286e+08	4.90112e+08	7.05147e+08	4.92003e+08	6.30898e+08	6.14441e+08	6.94327e+08	6.96322e+08	5.28228e+08	50	58	45	44	52	54	47	46	55
P07153	1	1	55.34	0.352322	1.18308	Exercise	Control	Dolichyl-diphosphooligosaccharide--protein glycosyltransferase subunit 1 OS=Rattus norvegicus GN=Rpn1 PE=2 SV=1	115471	63089.4	115484	224360	115641	76872.6	162700	81079	170593	143904	247470	128056	95741.8	152108	75078.6	116528	127304	55375.1	96059	199686	99661.2	57752.4	164067	66506.8	141796	124156	211815	140023	95741.8	181376	76894.6	113397	0	0	0	1	0	0	0	0	0
D4A5L5	1	1	35.67	0.352718	1.0987	Control	Exercise	Protein Rdx OS=Rattus norvegicus GN=Rdx PE=4 SV=1	1.84857e+06	2.01822e+06	2.34596e+06	1.65261e+06	2.58365e+06	1.89444e+06	1.82116e+06	1.45956e+06	2.70785e+06	1.19747e+06	2.42232e+06	1.52582e+06	1.29708e+06	1.23897e+06	1.58953e+06	2.24157e+06	2.03802e+06	1.77144e+06	1.95137e+06	1.47086e+06	2.22662e+06	1.42325e+06	1.83646e+06	1.19724e+06	2.25075e+06	1.03315e+06	2.07331e+06	1.6684e+06	1.29708e+06	1.47737e+06	1.62798e+06	2.18136e+06	0	0	0	0	0	0	0	0	1
F1M9Q5;P17425	2	2	91	0.352957	4.83824	Control	Exercise	Hydroxymethylglutaryl-CoA synthase, mitochondrial (Fragment) OS=Rattus norvegicus GN=Hmgcs2 PE=4 SV=1	10872.7	146822	19585	26977	22764.2	23392.9	852129	41619.7	7519.48	31323.6	29504	32387	25018.7	29144.5	49365.6	32220.3	11987	128869	16290.7	24010.1	19618.4	17574.5	859288	34139.5	6250.14	27025.1	25253.1	35413.5	25018.7	34752.4	50559.7	31354.8	0	0	0	0	0	0	2	0	0
D3ZFY6	1	1	52.24	0.353678	1.09469	Control	Exercise	Protein mrpl9 OS=Rattus norvegicus GN=mrpl9 PE=4 SV=1	36020.6	42186.1	32727.2	28083.6	37080.8	43419.2	33008.2	42368.5	42160.2	34734.6	46160.9	17364.1	22005.7	40722.1	36337.3	29901.3	39712.1	37027.8	27222.4	24995	31956.7	32619.7	33285.6	34753.7	35043.3	29968.1	39510.1	18986.8	22005.7	48557.7	37216.3	29098.1	0	0	0	0	1	0	0	0	0
Q80W96	1	1	47.21	0.35394	1.10551	Exercise	Control	Iron-sulfur cluster assembly 1 homolog, mitochondrial OS=Rattus norvegicus GN=Isca1 PE=2 SV=1	462836	253353	218963	265783	195860	321596	265611	352507	468494	275840	295740	313345	232163	358665	313801	324976	510268	222375	182133	236553	168794	241606	267842	289152	389409	237987	253130	342627	232163	427678	321391	316246	0	0	0	0	1	1	1	1	0
F1M4K2;D3ZV37	2	2	97.06	0.354179	1.11021	Exercise	Control	Protein Cisd3 (Fragment) OS=Rattus norvegicus GN=Cisd3 PE=4 SV=1	363465	391090	459096	248554	381125	720400	686573	757101	375459	616503	701231	490085	604416	566330	653854	441189	400714	343269	381875	221219	328458	541217	692341	621029	312079	531903	600199	535883	604416	675301	669669	429337	1	0	0	0	0	1	2	1	1
Q5M9H2;D3ZMF5;P45953	41	40	3942.39	0.355319	1.05492	Exercise	Control	Acyl-Coenzyme A dehydrogenase, very long chain OS=Rattus norvegicus GN=Acadvl PE=2 SV=1	7.29082e+08	7.20097e+08	6.73135e+08	6.03169e+08	6.80179e+08	7.95231e+08	6.70258e+08	7.7095e+08	6.46478e+08	9.39723e+08	7.16895e+08	6.84921e+08	6.98042e+08	7.00853e+08	8.25763e+08	7.39316e+08	8.038e+08	6.32047e+08	5.59912e+08	5.36835e+08	5.86186e+08	5.97436e+08	6.7589e+08	6.32388e+08	5.37349e+08	8.10768e+08	6.13606e+08	7.48927e+08	6.98042e+08	8.35708e+08	8.45737e+08	7.19455e+08	62	61	58	54	59	61	63	63	56
F1M7S4	8	8	530.94	0.357094	1.14796	Exercise	Control	Mast cell carboxypeptidase A OS=Rattus norvegicus GN=Cpa3 PE=4 SV=1	6.79941e+06	7.53846e+06	1.93626e+07	6.49056e+06	5.01707e+06	1.11254e+07	1.59554e+07	1.2042e+07	7.72804e+06	1.10054e+07	2.00775e+07	1.47111e+07	1.44681e+07	9.26295e+06	1.04705e+07	9.08462e+06	7.49623e+06	6.6167e+06	1.61057e+07	5.77675e+06	4.32377e+06	8.35824e+06	1.60894e+07	9.87772e+06	6.4235e+06	9.49518e+06	1.71848e+07	1.60859e+07	1.44681e+07	1.10453e+07	1.07238e+07	8.84057e+06	3	3	6	3	3	5	6	3	4
Q3KRE0	3	3	159.39	0.357806	1.07329	Exercise	Control	ATPase family AAA domain-containing protein 3 OS=Rattus norvegicus GN=Atad3 PE=2 SV=1	1.47877e+06	1.18318e+06	1.05259e+06	1.16956e+06	1.2521e+06	1.47477e+06	1.25187e+06	1.58656e+06	1.26388e+06	1.93004e+06	1.26238e+06	1.27431e+06	1.44837e+06	1.4822e+06	1.31644e+06	1.23767e+06	1.63031e+06	1.0385e+06	875542	1.04093e+06	1.07908e+06	1.10796e+06	1.26239e+06	1.30141e+06	1.05053e+06	1.66518e+06	1.0805e+06	1.39339e+06	1.44837e+06	1.7674e+06	1.34828e+06	1.20442e+06	2	3	1	2	2	1	2	3	1
D3ZXK4	3	3	158.2	0.358549	1.12961	Exercise	Control	Protein Abhd11 OS=Rattus norvegicus GN=Abhd11l1 PE=4 SV=1	969507	869382	810554	719224	836343	730923	688950	768947	1.10657e+06	1.18018e+06	1.19151e+06	880901	624151	866589	619210	753415	1.06886e+06	763079	674216	640126	720770	549123	694738	630746	919775	1.01823e+06	1.01984e+06	963221	624151	1.03333e+06	634187	733176	3	2	0	1	1	1	1	1	2
Q5PPN7	7	7	382.8	0.359278	1.07849	Exercise	Control	Coiled-coil domain-containing protein 51 OS=Rattus norvegicus GN=Ccdc51 PE=2 SV=2	1.27435e+06	1.48074e+06	1.16591e+06	1.09535e+06	1.32336e+06	1.70845e+06	1.06088e+06	1.90035e+06	1.24234e+06	1.77538e+06	1.35755e+06	1.34363e+06	1.37264e+06	1.86375e+06	1.5632e+06	1.35506e+06	1.40495e+06	1.29968e+06	969798	974890	1.14049e+06	1.28351e+06	1.06979e+06	1.5588e+06	1.03262e+06	1.53176e+06	1.16196e+06	1.46919e+06	1.37264e+06	2.22236e+06	1.60101e+06	1.31866e+06	1	3	2	2	2	3	0	3	1
F1M7X3	2	2	177.94	0.359526	1.07558	Exercise	Control	Protein Cdh13 (Fragment) OS=Rattus norvegicus GN=Cdh13 PE=4 SV=1	671714	704046	829296	810938	718768	1.03516e+06	725406	833376	831854	1.10544e+06	887907	778856	873848	836669	622201	870244	740552	617958	689806	721753	619443	777686	731501	683595	691432	953740	759979	851640	873848	997657	637251	846866	2	2	2	2	2	2	1	2	2
P0C169;D4AEC0	2	2	99.93	0.362111	1.3455	Control	Exercise	Histone H2A type 1-C OS=Rattus norvegicus PE=1 SV=2	471715	471638	772170	942695	1.76922e+06	1.65537e+06	328729	548205	1.50164e+06	521230	643382	441964	344474	247459	496550	975893	520057	413969	642289	839020	1.52473e+06	1.24364e+06	331491	449677	1.24816e+06	449704	550684	483266	344474	295074	508560	949677	1	1	1	1	2	1	1	1	1
F1MAE6	3	3	154.26	0.365351	2.57681	Control	Exercise	Ornithine carbamoyltransferase, mitochondrial OS=Rattus norvegicus GN=Otc PE=3 SV=1	245740	481865	21178.8	215673	384992	285783	3.22094e+06	98586.8	402658	95495.9	51998.3	20734.8	128657	78560.7	518477	626239	270924	422945	17616.5	191954	331791	214701	3.248e+06	80868	334687	82391.4	44506.5	22672.5	128657	93676.9	531018	609416	0	0	0	0	0	0	3	0	0
P14604	15	14	1168.91	0.366663	1.05221	Exercise	Control	Enoyl-CoA hydratase, mitochondrial OS=Rattus norvegicus GN=Echs1 PE=1 SV=1	3.63344e+08	3.80315e+08	3.68142e+08	3.02852e+08	3.09732e+08	4.13047e+08	3.35311e+08	4.0126e+08	3.49827e+08	4.68201e+08	3.66856e+08	3.40299e+08	3.53511e+08	3.86652e+08	4.06481e+08	3.52222e+08	4.0058e+08	3.33812e+08	3.0622e+08	2.69545e+08	2.66931e+08	3.10311e+08	3.38128e+08	3.29142e+08	2.90774e+08	4.03951e+08	3.14e+08	3.721e+08	3.53511e+08	4.6105e+08	4.16313e+08	3.4276e+08	26	24	25	26	26	30	24	30	24
D3ZF13;D3ZZH0	2	2	97.26	0.367531	1.08578	Control	Exercise	Acyl carrier protein OS=Rattus norvegicus GN=LOC683884 PE=3 SV=1	3.44971e+06	3.01586e+06	2.32091e+06	2.17424e+06	2.62177e+06	2.28904e+06	2.0146e+06	2.33818e+06	1.82324e+06	2.3229e+06	2.14923e+06	2.31955e+06	2.31315e+06	2.91556e+06	2.79715e+06	1.98569e+06	3.80325e+06	2.6471e+06	1.93053e+06	1.93512e+06	2.25947e+06	1.71969e+06	2.03152e+06	1.91794e+06	1.51547e+06	2.00413e+06	1.83957e+06	2.53631e+06	2.31315e+06	3.47656e+06	2.86481e+06	1.93234e+06	1	1	2	1	0	2	0	1	1
G3V6I5;E9PSW5	9	9	631.94	0.367665	1.04354	Exercise	Control	Protein Dnaja3 OS=Rattus norvegicus GN=Dnaja3 PE=3 SV=1	1.73903e+07	1.65066e+07	1.47763e+07	1.43638e+07	1.52051e+07	1.80721e+07	1.72788e+07	1.72401e+07	1.67842e+07	2.0564e+07	1.53482e+07	1.5267e+07	1.74143e+07	1.71535e+07	1.75839e+07	1.64142e+07	1.91724e+07	1.44883e+07	1.22909e+07	1.27841e+07	1.31039e+07	1.35771e+07	1.74239e+07	1.41416e+07	1.3951e+07	1.7742e+07	1.31369e+07	1.66937e+07	1.74143e+07	2.04541e+07	1.80092e+07	1.59733e+07	9	7	6	8	5	4	8	6	9
D4A305	3	3	168.79	0.368866	1.0569	Control	Exercise	Coiled-coil domain containing 58 (Predicted), isoform CRA_c OS=Rattus norvegicus GN=Ccdc58 PE=4 SV=1	921105	863583	759208	786749	708628	951784	835076	970194	763883	995072	751845	778613	645990	907971	728840	858225	1.0155e+06	757988	631507	700225	610704	715050	842092	795823	634935	858522	643521	851374	645990	1.08268e+06	746470	835170	2	1	3	0	0	0	1	0	1
P84817	6	6	405.23	0.369176	1.06233	Exercise	Control	Mitochondrial fission 1 protein OS=Rattus norvegicus GN=Fis1 PE=1 SV=1	8.5938e+06	8.38776e+06	7.19229e+06	6.92303e+06	6.86458e+06	9.2868e+06	7.42576e+06	1.00179e+07	9.96705e+06	1.02411e+07	7.56224e+06	7.55568e+06	7.77678e+06	9.43966e+06	8.12389e+06	8.05761e+06	9.4745e+06	7.36215e+06	5.98253e+06	6.16166e+06	5.91598e+06	6.97693e+06	7.48815e+06	8.21742e+06	8.28455e+06	8.83572e+06	6.47268e+06	8.26176e+06	7.77678e+06	1.1256e+07	8.32039e+06	7.84115e+06	3	5	3	2	1	4	5	2	4
F1LU71	6	5	277.76	0.36978	1.10775	Control	Exercise	Protein Auh (Fragment) OS=Rattus norvegicus GN=Auh PE=3 SV=1	2.31109e+06	3.28147e+06	2.03099e+06	2.3677e+06	3.09784e+06	3.8156e+06	3.16334e+06	3.47402e+06	1.96102e+06	2.34794e+06	2.19353e+06	2.43857e+06	3.35879e+06	2.87877e+06	3.31242e+06	2.76107e+06	2.54794e+06	2.88023e+06	1.68937e+06	2.10731e+06	2.66976e+06	2.86656e+06	3.18992e+06	2.84964e+06	1.62999e+06	2.02574e+06	1.87749e+06	2.66645e+06	3.35879e+06	3.43269e+06	3.39254e+06	2.6869e+06	2	2	2	3	2	3	3	4	1
Q5BJN5	1	1	65.33	0.370192	1.10074	Exercise	Control	Mitochondrial intermembrane space import and assembly protein 40 OS=Rattus norvegicus GN=Chchd4 PE=2 SV=1	253982	246796	258369	218805	230945	262466	237873	260083	209234	322158	341363	349177	220829	233572	207497	283887	280011	216619	214911	194742	199031	197184	239871	213339	173914	277949	292180	381808	220829	278514	212516	276260	0	1	1	0	1	1	1	1	0
P15999;F1LP05	44	43	3924.25	0.370681	1.05352	Exercise	Control	ATP synthase subunit alpha, mitochondrial OS=Rattus norvegicus GN=Atp5a1 PE=1 SV=2	3.57058e+09	3.84883e+09	3.57777e+09	3.19238e+09	3.12855e+09	4.08976e+09	3.58136e+09	4.49743e+09	3.39423e+09	4.488e+09	3.8822e+09	3.37194e+09	3.70575e+09	4.08932e+09	4.4382e+09	3.69518e+09	3.93649e+09	3.37822e+09	2.97598e+09	2.84129e+09	2.69622e+09	3.07253e+09	3.61145e+09	3.68912e+09	2.82127e+09	3.87213e+09	3.32286e+09	3.68705e+09	3.70575e+09	4.87616e+09	4.54555e+09	3.59591e+09	90	96	92	89	93	108	111	117	95
D3ZZU5	1	1	65.03	0.371232	1.07567	Exercise	Control	Protein Sypl1 OS=Rattus norvegicus GN=Sypl1 PE=4 SV=1	349276	409712	375873	528673	423112	372834	413419	565131	567966	421666	496192	498350	406975	538447	372450	396134	385071	359615	312650	470532	364643	280101	416893	463561	472090	363802	424702	544921	406975	642053	381459	385492	1	0	1	1	1	0	1	1	1
D3ZS80	1	1	37.38	0.371992	1.12019	Exercise	Control	AP-1 complex subunit beta-1 OS=Rattus norvegicus GN=Ap1b1 PE=4 SV=1	27242.9	22678.6	26013.7	16008.2	16777.1	23224.1	28682.9	30610.4	29766.1	21780.3	43562.5	22678.1	23564	27772.2	21350.1	23749.8	30034.8	19905.6	21638.1	14247.7	14458.7	17447.7	28923.9	25108.8	24741.4	18791.5	37286.1	24797.4	23564	33116	21866.6	23111.8	0	0	0	0	0	0	0	0	0
Q5XIA8	4	4	247.63	0.374843	1.06561	Exercise	Control	Growth hormone-inducible transmembrane protein OS=Rattus norvegicus GN=Ghitm PE=2 SV=1	2.07812e+06	2.34631e+06	2.24436e+06	2.31821e+06	2.24284e+06	2.86561e+06	1.99347e+06	2.59241e+06	2.06216e+06	3.12692e+06	2.43412e+06	2.02015e+06	2.50537e+06	2.77488e+06	2.61917e+06	2.36422e+06	2.29108e+06	2.05942e+06	1.86685e+06	2.06326e+06	1.93291e+06	2.15285e+06	2.01021e+06	2.12648e+06	1.71405e+06	2.69782e+06	2.08341e+06	2.20893e+06	2.50537e+06	3.30881e+06	2.68253e+06	2.30071e+06	3	2	3	3	3	3	3	3	3
D3ZF37	1	1	93.15	0.375011	1.15416	Exercise	Control	Uncharacterized protein OS=Rattus norvegicus PE=4 SV=1	498058	325744	542942	869022	366815	387483	500269	141458	411339	506987	865674	760512	483864	440444	376588	346262	549100	285914	451617	773450	316125	291106	504472	116034	341902	437415	740949	831581	483864	525192	385697	336960	0	0	1	0	0	0	0	0	0
D3ZS75	1	1	86.46	0.376241	1.07904	Control	Exercise	Protein Ndufc1 OS=Rattus norvegicus GN=LOC100364536 PE=4 SV=1	1.20939e+06	1.39823e+06	1.09656e+06	981053	1.2016e+06	1.53952e+06	949215	1.26076e+06	1.12387e+06	1.27031e+06	1.01476e+06	873670	1.11858e+06	1.53503e+06	1.06125e+06	932967	1.33333e+06	1.22726e+06	912117	873160	1.03555e+06	1.1566e+06	957191	1.03417e+06	934153	1.09599e+06	868552	955315	1.11858e+06	1.83039e+06	1.08691e+06	907904	1	1	0	1	1	1	1	1	1
Q4G064	2	2	192.91	0.376316	1.14371	Exercise	Control	2-methoxy-6-polyprenyl-1,4-benzoquinol methylase, mitochondrial OS=Rattus norvegicus GN=Coq5 PE=2 SV=1	750700	718711	717803	487173	411370	791225	652890	1.00356e+06	480512	988726	806372	530583	867766	969355	1.033e+06	652313	827633	630830	597066	433596	354524	594427	658375	823190	399399	853047	690191	580166	867766	1.15587e+06	1.05799e+06	634789	1	2	0	1	1	2	1	3	1
F1LPG5;D3ZQH7;D3ZRS5;D4AD47;F1M7T1	6	6	339.39	0.377904	1.04684	Control	Exercise	Protein LOC688963 OS=Rattus norvegicus GN=LOC688963 PE=4 SV=1	1.0635e+08	1.14765e+08	1.05396e+08	1.05525e+08	1.17635e+08	1.29968e+08	1.03137e+08	1.20381e+08	9.63719e+07	9.91088e+07	1.07634e+08	9.77398e+07	1.12883e+08	1.01501e+08	1.46896e+08	1.00608e+08	1.17249e+08	1.00732e+08	8.76679e+07	9.39197e+07	1.01379e+08	9.76414e+07	1.04003e+08	9.87449e+07	8.01038e+07	8.55085e+07	9.21261e+07	1.06874e+08	1.12883e+08	1.21031e+08	1.50449e+08	9.79053e+07	5	6	3	7	3	4	5	3	3
Q9Z1N4;F1LMK1	2	2	106.36	0.379469	1.07476	Exercise	Control	3'(2'),5'-bisphosphate nucleotidase 1 OS=Rattus norvegicus GN=Bpnt1 PE=1 SV=1	287666	208289	200053	243618	279465	359121	227205	185649	221057	296988	284708	238240	264957	344731	252770	236459	317147	182820	166403	216825	240846	269798	229114	152282	183741	256233	243688	260504	264957	411063	258884	230107	1	1	0	0	1	1	0	0	1
Q7TQ16	4	4	228.36	0.379986	1.03654	Exercise	Control	Cytochrome b-c1 complex subunit 8 OS=Rattus norvegicus GN=Uqcrq PE=2 SV=1	4.8889e+07	4.79829e+07	4.25301e+07	4.59776e+07	4.12225e+07	5.05641e+07	4.66372e+07	5.61099e+07	4.98872e+07	5.07981e+07	5.01774e+07	4.21798e+07	4.76301e+07	5.01909e+07	5.30695e+07	4.98625e+07	5.38992e+07	4.21158e+07	3.53764e+07	4.09212e+07	3.5526e+07	3.79875e+07	4.7029e+07	4.60254e+07	4.14659e+07	4.38273e+07	4.29479e+07	4.61215e+07	4.76301e+07	5.98484e+07	5.43532e+07	4.8523e+07	4	4	2	2	2	5	2	3	3
Q641Z9	5	5	335.18	0.380336	1.04534	Control	Exercise	Protein Sdhc OS=Rattus norvegicus GN=Sdhc PE=2 SV=1	4.06957e+07	3.99088e+07	4.24354e+07	3.64976e+07	4.68152e+07	4.67941e+07	4.20111e+07	3.97796e+07	3.15879e+07	4.50509e+07	3.66823e+07	3.93857e+07	4.24411e+07	4.22769e+07	4.55686e+07	3.74182e+07	4.48663e+07	3.5029e+07	3.52977e+07	3.24837e+07	4.03459e+07	3.51552e+07	4.23641e+07	3.26301e+07	2.62557e+07	3.88687e+07	3.13972e+07	4.30663e+07	4.24411e+07	5.04116e+07	4.66708e+07	3.6413e+07	4	6	3	4	4	4	5	4	6
P11884;F1LN88;P13601;Q63639	27	24	1752.84	0.381647	1.05008	Control	Exercise	Aldehyde dehydrogenase, mitochondrial OS=Rattus norvegicus GN=Aldh2 PE=1 SV=1	2.82624e+08	3.18833e+08	3.04756e+08	2.46126e+08	2.70923e+08	3.21208e+08	3.32844e+08	3.15941e+08	2.6192e+08	3.71285e+08	2.64242e+08	2.54969e+08	2.80886e+08	2.74196e+08	3.05522e+08	2.66095e+08	3.11588e+08	2.79848e+08	2.53495e+08	2.19058e+08	2.33484e+08	2.41315e+08	3.3564e+08	2.59157e+08	2.17706e+08	3.20335e+08	2.2617e+08	2.78796e+08	2.80886e+08	3.26955e+08	3.12912e+08	2.58947e+08	23	27	22	21	24	23	25	21	20
F1LQN3	4	4	289.43	0.38367	1.1566	Exercise	Control	Reticulon-4 OS=Rattus norvegicus GN=Rtn4 PE=4 SV=1	2.12654e+06	2.11506e+06	2.0481e+06	3.16896e+06	2.15288e+06	1.85258e+06	2.64535e+06	1.12576e+06	2.50152e+06	1.60052e+06	2.56589e+06	4.15368e+06	2.12113e+06	3.07941e+06	1.66779e+06	2.24435e+06	2.34447e+06	1.85644e+06	1.7036e+06	2.82045e+06	1.85537e+06	1.39179e+06	2.66757e+06	923431	2.07925e+06	1.38088e+06	2.1962e+06	4.54184e+06	2.12113e+06	3.67194e+06	1.70813e+06	2.18406e+06	4	2	1	2	0	0	2	0	2
F1LW44;F1LYM4	5	5	261.26	0.384366	1.10124	Control	Exercise	Neurolysin, mitochondrial (Fragment) OS=Rattus norvegicus GN=Nln PE=3 SV=1	1.87702e+06	1.64786e+06	1.36904e+06	1.17257e+06	1.10368e+06	1.0177e+06	1.22196e+06	1.56703e+06	1.48153e+06	1.98856e+06	980971	831792	1.09136e+06	1.1998e+06	1.35816e+06	1.03556e+06	2.06938e+06	1.44637e+06	1.13876e+06	1.04361e+06	951164	764568	1.23222e+06	1.28539e+06	1.23144e+06	1.71568e+06	839634	909523	1.09136e+06	1.43066e+06	1.39101e+06	1.00775e+06	1	1	1	0	0	0	0	0	0
D3ZJX5	1	1	57.18	0.385194	1.14482	Exercise	Control	Uncharacterized protein OS=Rattus norvegicus PE=4 SV=1	227518	336591	224095	254582	108253	188675	238336	327679	243320	370680	361754	210515	178197	360135	261527	195581	250835	295435	186401	226584	93293.7	141747	240338	268786	202246	319813	309633	230188	178197	429431	267853	190327	1	1	0	0	0	0	0	1	0
G3V8F5;Q75Q40	5	5	381.65	0.387732	1.04451	Exercise	Control	Mitochondrial import receptor subunit TOM40 homolog OS=Rattus norvegicus GN=Tomm40 PE=4 SV=1	7.26519e+06	8.47176e+06	7.07442e+06	6.90018e+06	7.65506e+06	8.96288e+06	7.42635e+06	8.38984e+06	7.68108e+06	8.68972e+06	8.71874e+06	6.72993e+06	7.79445e+06	8.87353e+06	8.83158e+06	7.59253e+06	8.00974e+06	7.43588e+06	5.88449e+06	6.14132e+06	6.59722e+06	6.73357e+06	7.48875e+06	6.88195e+06	6.38446e+06	7.49726e+06	7.46256e+06	7.35884e+06	7.79445e+06	1.05809e+07	9.04521e+06	7.38857e+06	4	4	5	3	3	4	5	3	6
D4ADD7	1	1	98.79	0.391479	1.07701	Exercise	Control	Glutaredoxin 5 homolog (S. cerevisiae) (Predicted), isoform CRA_b OS=Rattus norvegicus GN=Glrx5 PE=4 SV=1	884534	1.00605e+06	665423	881372	1.11721e+06	1.14063e+06	940490	824704	835907	1.05461e+06	921798	811601	898549	1.08709e+06	1.31994e+06	1.10542e+06	975183	883039	553497	784442	962828	856922	948392	676481	694800	909892	788987	887445	898549	1.29626e+06	1.35186e+06	1.07573e+06	1	1	0	1	1	0	1	0	1
P67779;D3ZFE2;D3ZFH6;D3ZN73;D4A508;D4AD84;F1LWX0;F1M122	14	13	989.66	0.391607	1.05715	Exercise	Control	Prohibitin OS=Rattus norvegicus GN=Phb PE=1 SV=1	6.13815e+07	6.25136e+07	5.97488e+07	4.89311e+07	5.48396e+07	6.33649e+07	5.88916e+07	6.36642e+07	6.40212e+07	7.897e+07	5.34422e+07	5.57464e+07	6.17848e+07	6.18206e+07	7.05418e+07	5.40589e+07	6.7672e+07	5.48698e+07	4.96989e+07	4.35498e+07	4.72614e+07	4.76044e+07	5.93864e+07	5.22219e+07	5.32141e+07	6.81332e+07	4.57423e+07	6.09559e+07	6.17848e+07	7.37159e+07	7.22481e+07	5.26066e+07	11	10	8	10	6	9	8	12	10
F1LQZ0	2	2	102.78	0.398794	1.04759	Control	Exercise	Protein RGD1563224 OS=Rattus norvegicus GN=RGD1563224 PE=4 SV=1	6.6975e+06	6.2299e+06	5.90296e+06	6.08547e+06	5.97931e+06	6.67532e+06	5.11842e+06	7.50611e+06	5.08032e+06	6.57353e+06	6.23461e+06	5.32869e+06	6.2472e+06	5.99076e+06	6.44909e+06	6.01031e+06	7.38387e+06	5.46814e+06	4.91006e+06	5.41621e+06	5.15304e+06	5.01499e+06	5.16142e+06	6.15705e+06	4.22273e+06	5.67147e+06	5.33634e+06	5.82666e+06	6.2472e+06	7.14347e+06	6.60508e+06	5.84885e+06	2	2	2	1	3	2	3	2	2
P50339	5	2	342.76	0.398855	1.14928	Exercise	Control	Chymase OS=Rattus norvegicus GN=Cma1 PE=2 SV=1	581482	781460	2.07675e+06	684027	408148	808855	1.65934e+06	917076	825295	1.14817e+06	2.0576e+06	1.47794e+06	1.27451e+06	633973	905801	775712	641074	685907	1.72743e+06	608800	351746	607671	1.67328e+06	752252	685980	990607	1.76114e+06	1.61606e+06	1.27451e+06	755959	927711	754874	1	1	3	1	1	2	2	1	1
F1LRV9;B6RK61;D3ZB27;D4A0G3;D4A5W7;F1LMN2;F1LSV3;F1LSW2;F1LTV5;F1M6M9	126	15	11497.3	0.400189	1.1875	Control	Exercise	Myosin-4 OS=Rattus norvegicus GN=Myh4 PE=4 SV=1	1.12593e+08	9.43614e+07	1.02974e+08	1.36348e+08	1.7071e+08	1.16579e+08	7.93685e+07	4.59043e+07	1.402e+08	4.67758e+07	1.03718e+08	1.08817e+08	8.71663e+07	6.45697e+07	7.01434e+07	1.01842e+08	1.24132e+08	8.28233e+07	8.56532e+07	1.21353e+08	1.4712e+08	8.75825e+07	8.00353e+07	3.7654e+07	1.16533e+08	4.03569e+07	8.87741e+07	1.18986e+08	8.71663e+07	7.69939e+07	7.18401e+07	9.9106e+07	17	17	18	18	18	16	12	10	18
D4A4L5	4	3	236.02	0.400977	1.08611	Exercise	Control	Protein RGD1563216 OS=Rattus norvegicus GN=RGD1563216 PE=4 SV=1	2.27667e+06	2.19931e+06	2.44415e+06	2.22927e+06	2.16027e+06	3.46617e+06	2.71401e+06	3.47639e+06	2.69041e+06	3.69622e+06	2.93401e+06	1.90263e+06	2.67513e+06	2.74759e+06	3.32215e+06	2.80341e+06	2.50998e+06	1.93039e+06	2.03304e+06	1.9841e+06	1.86174e+06	2.60404e+06	2.73682e+06	2.85158e+06	2.23625e+06	3.18901e+06	2.51128e+06	2.08043e+06	2.67513e+06	3.27627e+06	3.40251e+06	2.7281e+06	2	1	2	0	0	1	1	3	1
D3ZSD8;D3ZSE8	8	8	577.44	0.401041	1.05207	Exercise	Control	Protein Tmem143 OS=Rattus norvegicus GN=Tmem143 PE=4 SV=1	5.35085e+06	6.85399e+06	6.10689e+06	5.92314e+06	7.16778e+06	6.98232e+06	6.90974e+06	6.42509e+06	5.53639e+06	7.38203e+06	5.95461e+06	6.53784e+06	6.91381e+06	7.19055e+06	8.17207e+06	6.72553e+06	5.89921e+06	6.01592e+06	5.07969e+06	5.27174e+06	6.17728e+06	5.24563e+06	6.9678e+06	5.27033e+06	4.60181e+06	6.36902e+06	5.09668e+06	7.1488e+06	6.91381e+06	8.57413e+06	8.36974e+06	6.54486e+06	4	4	3	3	4	7	6	6	3
D3ZBM3;F1LTK5	7	7	550.41	0.402967	1.04052	Exercise	Control	Ferrochelatase OS=Rattus norvegicus GN=Fech PE=3 SV=1	4.17147e+06	4.06962e+06	4.15928e+06	3.49403e+06	4.16715e+06	4.25988e+06	3.85861e+06	4.48802e+06	3.8906e+06	5.08274e+06	4.40889e+06	3.77469e+06	4.31791e+06	4.15764e+06	4.49666e+06	3.86254e+06	4.59897e+06	3.57201e+06	3.45968e+06	3.10977e+06	3.5913e+06	3.20033e+06	3.89103e+06	3.6814e+06	3.23384e+06	4.38525e+06	3.77367e+06	4.12743e+06	4.31791e+06	4.95763e+06	4.60543e+06	3.75877e+06	4	3	4	2	4	5	3	5	2
D4A0Y4	5	5	277.32	0.404413	1.07117	Exercise	Control	Oxidoreductase NAD-binding domain containing 1 (Predicted), isoform CRA_b OS=Rattus norvegicus GN=Oxnad1 PE=4 SV=1	1.99252e+06	1.69439e+06	1.94239e+06	1.93303e+06	2.1706e+06	3.13932e+06	1.77633e+06	1.65543e+06	1.93587e+06	2.22874e+06	1.80179e+06	1.97226e+06	2.02751e+06	2.18667e+06	2.97448e+06	2.33711e+06	2.19671e+06	1.48721e+06	1.61567e+06	1.72044e+06	1.87065e+06	2.35849e+06	1.79126e+06	1.35791e+06	1.60909e+06	1.9229e+06	1.54219e+06	2.15656e+06	2.02751e+06	2.60742e+06	3.04643e+06	2.27433e+06	0	1	0	0	1	0	0	1	1
D3ZIL6;D3Z9T7;D4A1D0	3	3	143.84	0.405538	1.10725	Exercise	Control	Enoyl Coenzyme A hydratase domain containing 2 (Predicted), isoform CRA_a OS=Rattus norvegicus GN=Echdc2 PE=3 SV=1	861166	1.17594e+06	837573	1.04433e+06	858422	1.28541e+06	1.11862e+06	2.32125e+06	793887	1.41771e+06	1.56619e+06	1.10451e+06	1.17475e+06	1.11443e+06	1.80434e+06	1.54609e+06	949420	1.03215e+06	696691	929478	739798	965694	1.12802e+06	1.90406e+06	659874	1.22316e+06	1.34054e+06	1.20773e+06	1.17475e+06	1.32886e+06	1.84798e+06	1.50456e+06	1	1	1	1	1	2	1	2	1
B2RYM8	1	1	43.7	0.406279	1.0551	Exercise	Control	Protein RGD1311378 OS=Rattus norvegicus GN=Fam210b PE=2 SV=1	59181.8	57337.7	42265.8	64834.6	458.966	61095	65869.1	67281.4	43045.4	72561.5	54866.6	59317.2	43127	58142.6	60438.8	49875.7	65246.8	50326.8	35156.5	57704.3	395.542	45899.1	66422.5	55189	35779	62604.2	46961.5	64860.4	43127	69330.1	61900.7	48535.9	0	0	0	0	0	0	0	1	0
D4A565	7	7	423.59	0.407044	1.0373	Control	Exercise	NADH dehydrogenase (Ubiquinone) 1 beta subcomplex, 5 (Predicted), isoform CRA_b OS=Rattus norvegicus GN=Ndufb5 PE=4 SV=1	1.18057e+08	1.08266e+08	9.88194e+07	9.68671e+07	1.01229e+08	1.01766e+08	9.61858e+07	1.12638e+08	1.0193e+08	1.20206e+08	9.47911e+07	9.1115e+07	8.79703e+07	9.85716e+07	1.12881e+08	9.6385e+07	1.30156e+08	9.50281e+07	8.21977e+07	8.6214e+07	8.72407e+07	7.64541e+07	9.69939e+07	9.2394e+07	8.47236e+07	1.0371e+08	8.11337e+07	9.96297e+07	8.79703e+07	1.17538e+08	1.15612e+08	9.37957e+07	6	6	7	9	6	7	5	7	8
Q6IFV6	5	1	255.58	0.407653	6.07107	Exercise	Control	Protein Krt35 OS=Rattus norvegicus GN=Krt35 PE=2 SV=1	54447.6	58108.7	49164.5	28565.3	137844	116995	58417.7	62859.3	42842	60802.7	51911.1	96711.7	2.99359e+06	44896.5	79207.6	68715.6	60027.5	51003.4	40894.9	25423.8	118796	87895.4	58908.6	51561.8	35610	52459	44431.8	105749	2.99359e+06	53535.3	81123.5	66869.6	0	0	0	0	0	0	0	0	0
P42123	6	3	332.8	0.408509	1.33754	Control	Exercise	L-lactate dehydrogenase B chain OS=Rattus norvegicus GN=Ldhb PE=1 SV=2	1.6328e+06	1.80704e+06	1.8302e+06	2.11553e+06	1.86143e+06	483927	1.51068e+06	493836	1.53344e+06	641058	717208	1.36127e+06	988700	1.14253e+06	902787	1.48693e+06	1.80014e+06	1.58609e+06	1.52235e+06	1.88287e+06	1.6042e+06	363562	1.52338e+06	405080	1.27458e+06	553088	613874	1.48848e+06	988700	1.36237e+06	924624	1.44698e+06	1	1	0	0	1	0	0	0	0
Q5XIH7;D4A278	18	16	1328.07	0.409665	1.05205	Exercise	Control	Prohibitin-2 OS=Rattus norvegicus GN=Phb2 PE=1 SV=1	6.6352e+07	7.05707e+07	6.27721e+07	5.37606e+07	6.40054e+07	8.23749e+07	7.5752e+07	7.7275e+07	6.73894e+07	8.73923e+07	6.69204e+07	6.60825e+07	7.31535e+07	7.97366e+07	7.7774e+07	6.31908e+07	7.31518e+07	6.19417e+07	5.22137e+07	4.78482e+07	5.51606e+07	6.18861e+07	7.63885e+07	6.33865e+07	5.60136e+07	7.53998e+07	5.72786e+07	7.22579e+07	7.31535e+07	9.50792e+07	7.96552e+07	6.14933e+07	14	15	13	16	16	19	15	19	13
F1LLX4	2	2	157.49	0.414514	1.15249	Control	Exercise	Protein Sqrdl (Fragment) OS=Rattus norvegicus GN=Sqrdl PE=4 SV=1	580879	744263	675365	723830	1.46103e+06	1.05158e+06	1.1231e+06	1.17121e+06	784600	827590	1.07592e+06	926145	887233	714376	640458	678420	640408	653259	561766	644226	1.25913e+06	790023	1.13254e+06	960708	652155	714023	920905	1.01269e+06	887233	851832	655949	660195	1	1	1	0	2	2	1	2	1
P70470	3	3	189.99	0.41852	1.04772	Exercise	Control	Acyl-protein thioesterase 1 OS=Rattus norvegicus GN=Lypla1 PE=1 SV=1	7.83443e+06	6.9336e+06	5.80897e+06	5.4235e+06	5.28683e+06	9.48083e+06	6.26817e+06	8.25051e+06	7.01694e+06	8.02666e+06	6.89204e+06	7.01628e+06	6.71433e+06	7.30829e+06	7.75861e+06	7.19187e+06	8.63732e+06	6.08579e+06	4.83189e+06	4.82704e+06	4.55625e+06	7.1227e+06	6.32084e+06	6.76767e+06	5.83244e+06	6.92519e+06	5.89904e+06	7.67195e+06	6.71433e+06	8.71452e+06	7.94628e+06	6.99867e+06	2	1	1	0	0	1	2	1	1
Q64536;F1LMM8	9	8	608.02	0.419767	1.0755	Exercise	Control	[Pyruvate dehydrogenase [lipoamide]] kinase isozyme 2, mitochondrial OS=Rattus norvegicus GN=Pdk2 PE=1 SV=1	9.13351e+06	1.09672e+07	1.04076e+07	1.00939e+07	1.02479e+07	1.29568e+07	1.24168e+07	1.42725e+07	9.11479e+06	1.42814e+07	1.19348e+07	1.08866e+07	1.15475e+07	1.48432e+07	1.45395e+07	1.01807e+07	1.00695e+07	9.62616e+06	8.65702e+06	8.98385e+06	8.83173e+06	9.73407e+06	1.25211e+07	1.17074e+07	7.57616e+06	1.23216e+07	1.02153e+07	1.1904e+07	1.15475e+07	1.76992e+07	1.48912e+07	9.90719e+06	6	6	6	5	5	6	5	6	4
D3ZMR9	1	1	49.32	0.420638	1.11222	Exercise	Control	Mitochondrial ribosomal protein L21 (Predicted), isoform CRA_a OS=Rattus norvegicus GN=Mrpl21 PE=4 SV=1	103469	91978.5	107180	80345.9	107788	100648	75938.3	103768	97188.1	110270	132687	73534.5	111473	146260	115689	70546.5	114073	80731.9	89152	71509.7	92893.1	75614.4	76576.3	85117.7	80782.1	95138.3	113570	80406.3	111473	174403	118487	68651.3	0	0	1	0	0	1	0	0	0
D4ADX3	2	2	104.71	0.421041	1.10288	Control	Exercise	Ras-related C3 botulinum toxin substrate 1, isoform CRA_b OS=Rattus norvegicus GN=Rac1 PE=3 SV=1	589393	508990	588520	568552	768821	1.0488e+06	802943	749308	656078	611041	744258	515473	652357	755871	626939	538557	649795	446753	489529	506025	662579	787939	809689	614636	545328	527190	637026	563644	652357	901312	642103	524089	1	1	1	0	1	1	1	1	2
Q63750	1	1	78.09	0.422102	1.07134	Exercise	Control	39S ribosomal protein L23, mitochondrial OS=Rattus norvegicus GN=Mrpl23 PE=2 SV=1	242285	272859	258236	189934	290097	266842	246108	239256	310075	291388	325383	202415	297909	261824	216780	242919	267114	239495	214800	169045	250009	200471	248176	196255	257733	251402	278502	221331	297909	312203	222024	236394	1	1	1	1	1	1	1	0	1
P31399;D3ZBE6;D3ZWT8;F1LNT9	10	10	828.89	0.422265	1.05688	Exercise	Control	ATP synthase subunit d, mitochondrial OS=Rattus norvegicus GN=Atp5h PE=1 SV=3	4.8465e+08	5.17567e+08	4.77031e+08	4.23478e+08	4.74885e+08	5.52378e+08	4.61862e+08	5.40608e+08	4.40321e+08	6.66133e+08	4.6491e+08	4.39781e+08	5.03818e+08	5.48334e+08	5.82509e+08	5.10328e+08	5.34318e+08	4.54282e+08	3.96793e+08	3.76906e+08	4.09261e+08	4.14987e+08	4.65742e+08	4.43445e+08	3.65992e+08	5.74722e+08	3.97927e+08	4.80878e+08	5.03818e+08	6.53842e+08	5.96599e+08	4.96619e+08	14	11	13	14	9	13	16	12	12
F1LZW6	7	4	355.45	0.422401	1.0485	Exercise	Control	Protein Slc25a13 (Fragment) OS=Rattus norvegicus GN=Slc25a13 PE=3 SV=1	5.87859e+07	5.89719e+07	5.44243e+07	4.49522e+07	5.16788e+07	5.46915e+07	5.47921e+07	6.03423e+07	5.29679e+07	6.98235e+07	6.18434e+07	4.9263e+07	5.89689e+07	4.99358e+07	6.20952e+07	5.50147e+07	6.48104e+07	5.17611e+07	4.527e+07	4.00086e+07	4.45374e+07	4.10883e+07	5.52525e+07	4.94971e+07	4.40266e+07	6.02419e+07	5.29331e+07	5.38666e+07	5.89689e+07	5.95443e+07	6.35972e+07	5.35368e+07	5	6	6	4	5	6	6	5	5
P07633	16	1	1377.75	0.424217	1.07399	Control	Exercise	Propionyl-CoA carboxylase beta chain, mitochondrial OS=Rattus norvegicus GN=Pccb PE=2 SV=1	7.82736e+06	7.09248e+06	6.03933e+06	5.57263e+06	6.25439e+06	9.08612e+06	7.63904e+06	8.4276e+06	7.26244e+06	9.34447e+06	5.65217e+06	4.89936e+06	6.28502e+06	6.23406e+06	7.16792e+06	7.10204e+06	8.62953e+06	6.22524e+06	5.0235e+06	4.95978e+06	5.39011e+06	6.82617e+06	7.70322e+06	6.91293e+06	6.0365e+06	8.06216e+06	4.83781e+06	5.3572e+06	6.28502e+06	7.43359e+06	7.3413e+06	6.91125e+06	1	2	2	1	1	2	2	2	1
F1M7H4	1	1	37.94	0.42434	1.08089	Exercise	Control	Protein LOC689621 (Fragment) OS=Rattus norvegicus GN=LOC689621 PE=4 SV=1	129616	94245	104115	87587.4	168011	200614	118801	142913	140867	119106	179566	128490	130108	187673	112806	131888	142899	82721.2	86602.9	77954.8	144794	150716	119799	117228	117088	102762	153695	140498	130108	223784	115535	128345	0	0	0	0	0	0	0	0	0
G3V9S0	10	10	608.27	0.425173	1.03022	Control	Exercise	Cytochrome b5 reductase 1 OS=Rattus norvegicus GN=Cyb5r1 PE=4 SV=1	2.31669e+07	2.43197e+07	2.30004e+07	2.0873e+07	2.29502e+07	2.36825e+07	2.12115e+07	2.46883e+07	2.51851e+07	2.43849e+07	2.22777e+07	2.12231e+07	2.00465e+07	2.44316e+07	2.01529e+07	2.07971e+07	2.55411e+07	2.1346e+07	1.91316e+07	1.85775e+07	1.97788e+07	1.7792e+07	2.13897e+07	2.02511e+07	2.09337e+07	2.10387e+07	1.9068e+07	2.32064e+07	2.00465e+07	2.91326e+07	2.06404e+07	2.02384e+07	8	7	7	4	6	6	6	8	9
F1MAL9	1	1	54.09	0.425808	1.23624	Exercise	Control	Collagen alpha-1(I) chain OS=Rattus norvegicus GN=Col1a1 PE=4 SV=1	24319.5	45896.2	156172	71454.5	22745.7	112065	71649.6	52381	64940.2	21815.4	91925.9	98084.5	123563	52320.9	74244.1	161303	26811.8	40284.2	129904	63596.2	19602.5	84191.8	72251.6	42966.7	53977.9	18821.7	78681.3	107251	123563	62388.2	76040	156970	0	0	0	0	0	0	0	0	0
D3ZA93	2	2	100.98	0.427051	1.07492	Control	Exercise	Protein Acot13 OS=Rattus norvegicus GN=Acot13 PE=4 SV=1	4.89696e+06	5.63024e+06	3.76851e+06	4.17155e+06	3.60803e+06	5.64442e+06	3.81831e+06	4.57354e+06	3.16734e+06	5.01396e+06	3.93731e+06	3.94723e+06	4.08667e+06	5.51027e+06	4.12166e+06	3.81007e+06	5.39881e+06	4.9418e+06	3.13464e+06	3.71278e+06	3.10944e+06	4.24051e+06	3.85039e+06	3.75155e+06	2.63267e+06	4.32591e+06	3.37003e+06	4.3161e+06	4.08667e+06	6.57053e+06	4.22135e+06	3.70772e+06	2	2	2	1	1	0	2	0	0
B2RZ37	1	1	61.94	0.427492	1.09845	Exercise	Control	Receptor expression-enhancing protein 5 OS=Rattus norvegicus GN=Reep5 PE=1 SV=1	253481	375494	311576	517291	484473	414392	692338	243105	356973	360587	441841	611723	369190	615713	506762	353468	279458	329580	259168	460401	417524	311322	698155	199412	296714	311105	378181	668888	369190	734185	519020	343973	1	1	1	1	1	1	1	1	1
Q811A2	1	1	67.33	0.433188	1.43621	Exercise	Control	Bone marrow stromal antigen 2 OS=Rattus norvegicus GN=Bst2 PE=1 SV=1	23342.3	49941.2	37809.1	42564	30957.9	35641.6	34566.4	19399.8	42257.4	72942.4	86648.3	10632.3	22326.4	75205.1	34427.1	49400.8	25734.4	43834.6	31449.5	37882.9	26679.9	26776.6	34856.9	15913.1	35124.1	62932.8	74164.2	11625.9	22326.4	89675.7	35259.8	48073.7	0	0	0	0	0	0	0	0	0
P11240	9	9	760.93	0.433815	1.06626	Exercise	Control	Cytochrome c oxidase subunit 5A, mitochondrial OS=Rattus norvegicus GN=Cox5a PE=1 SV=1	3.20377e+08	3.36264e+08	2.65194e+08	2.85088e+08	2.68327e+08	3.15877e+08	3.29936e+08	3.40269e+08	2.91349e+08	4.60971e+08	3.02699e+08	2.77102e+08	3.23506e+08	3.61835e+08	3.23618e+08	2.83343e+08	3.5321e+08	2.95147e+08	2.20587e+08	2.53735e+08	2.31248e+08	2.3731e+08	3.32708e+08	2.79113e+08	2.42168e+08	3.97713e+08	2.59087e+08	3.02997e+08	3.23506e+08	4.31458e+08	3.31446e+08	2.75731e+08	10	14	11	11	13	13	11	14	11
B2GV06;F1LQE8;F1M2B3	17	17	1666.93	0.434554	1.06486	Control	Exercise	Succinyl-CoA:3-ketoacid coenzyme A transferase 1, mitochondrial OS=Rattus norvegicus GN=Oxct1 PE=1 SV=1	2.08011e+08	1.72805e+08	2.04548e+08	2.04574e+08	1.95702e+08	2.52425e+08	2.40108e+08	2.89556e+08	2.19321e+08	2.47024e+08	1.98131e+08	1.81891e+08	1.78492e+08	2.28704e+08	2.11317e+08	1.9518e+08	2.29329e+08	1.51675e+08	1.70143e+08	1.82076e+08	1.68658e+08	1.89641e+08	2.42125e+08	2.37514e+08	1.82298e+08	2.13126e+08	1.69585e+08	1.98889e+08	1.78492e+08	2.7271e+08	2.16429e+08	1.89937e+08	23	17	20	19	22	23	18	26	20
Q66HF1	34	33	3022.8	0.438191	1.04662	Exercise	Control	NADH-ubiquinone oxidoreductase 75 kDa subunit, mitochondrial OS=Rattus norvegicus GN=Ndufs1 PE=1 SV=1	6.05761e+08	5.61305e+08	5.2514e+08	4.87949e+08	5.19112e+08	6.04116e+08	5.25843e+08	6.19818e+08	5.67176e+08	6.81177e+08	5.2505e+08	5.04249e+08	5.25078e+08	6.23418e+08	6.86818e+08	5.43492e+08	6.67841e+08	4.92672e+08	4.3681e+08	4.34287e+08	4.47377e+08	4.53856e+08	5.30261e+08	5.0842e+08	4.71433e+08	5.87702e+08	4.49402e+08	5.51371e+08	5.25078e+08	7.43374e+08	7.03431e+08	5.28891e+08	39	44	38	36	46	39	46	42	43
P04797;D3Z8U8;D3ZEN2;D3ZGY4;D3ZIY0;D3ZKR3;D3ZQT0;D3ZWV2;D4A6J7;D4A7F9;E9PTN6;F1LUI2;F1LUR7;F1LVV7;F1LW42;F1LW99;F1LZV7;F1M2N4;F1M2U5;F1M4D1;F8WFP3	10	10	618.09	0.440277	1.13975	Control	Exercise	Glyceraldehyde-3-phosphate dehydrogenase OS=Rattus norvegicus GN=Gapdh PE=1 SV=3	5.68104e+07	5.18149e+07	4.02078e+07	2.90913e+07	3.26878e+07	2.61549e+07	3.06349e+07	2.46822e+07	3.32944e+07	3.41943e+07	2.548e+07	3.64522e+07	2.75473e+07	3.54599e+07	2.88133e+07	3.50288e+07	6.26324e+07	4.54792e+07	3.34447e+07	2.58919e+07	2.81707e+07	1.96495e+07	3.08923e+07	2.02461e+07	2.76741e+07	2.9502e+07	2.18089e+07	3.98587e+07	2.75473e+07	4.22829e+07	2.95103e+07	3.40878e+07	8	8	5	4	4	1	4	3	4
D3ZKD5	7	7	330.06	0.440902	1.05524	Exercise	Control	Protein Pitrm1 OS=Rattus norvegicus GN=Pitrm1 PE=3 SV=1	2.61391e+06	3.12667e+06	2.87592e+06	2.94238e+06	3.09107e+06	4.07149e+06	3.37155e+06	3.84487e+06	3.40076e+06	4.43124e+06	3.33323e+06	2.93587e+06	3.2068e+06	3.40601e+06	3.6946e+06	2.96221e+06	2.88178e+06	2.74436e+06	2.39218e+06	2.61879e+06	2.66392e+06	3.0588e+06	3.39988e+06	3.15384e+06	2.82669e+06	3.82316e+06	2.85298e+06	3.21023e+06	3.2068e+06	4.06138e+06	3.78396e+06	2.88263e+06	2	1	0	1	2	2	2	2	1
F1LNF7	12	12	809.06	0.443827	1.03927	Exercise	Control	Isocitrate dehydrogenase [NAD] subunit alpha, mitochondrial OS=Rattus norvegicus GN=Idh3a PE=3 SV=1	1.39573e+08	1.40287e+08	1.11553e+08	1.0705e+08	1.10132e+08	1.31404e+08	1.20421e+08	1.33935e+08	1.16103e+08	1.48397e+08	1.37037e+08	1.15017e+08	1.23676e+08	1.35282e+08	1.36965e+08	1.20933e+08	1.53877e+08	1.23133e+08	9.27898e+07	9.52774e+07	9.49131e+07	9.87205e+07	1.21433e+08	1.09863e+08	9.6504e+07	1.28033e+08	1.17293e+08	1.25765e+08	1.23676e+08	1.61312e+08	1.40278e+08	1.17685e+08	13	12	11	10	11	9	11	14	11
G3V912	1	1	44.01	0.444471	1.37511	Exercise	Control	Protein Tmx4 OS=Rattus norvegicus GN=Tmx4 PE=4 SV=1	72959.2	110592	103002	81550.5	298192	270955	128375	176173	407538	302510	88504.6	62773.7	81512.6	254147	207747	302881	80436.2	97069.3	85677.1	72581.9	256985	203562	129454	144510	338743	260998	75753	68639.9	81512.6	303049	212772	294744	0	0	0	0	0	0	0	0	1
Q3B7D0	5	5	298.4	0.446576	1.0538	Exercise	Control	Coproporphyrinogen-III oxidase, mitochondrial OS=Rattus norvegicus GN=Cpox PE=2 SV=1	1.29133e+06	1.47258e+06	1.42003e+06	1.23669e+06	1.57384e+06	1.52795e+06	1.421e+06	1.72095e+06	1.272e+06	1.83291e+06	1.48201e+06	1.51843e+06	1.59974e+06	1.59671e+06	1.75992e+06	1.23014e+06	1.42367e+06	1.29252e+06	1.18117e+06	1.10068e+06	1.35635e+06	1.14791e+06	1.43294e+06	1.41164e+06	1.05728e+06	1.58139e+06	1.26848e+06	1.66033e+06	1.59974e+06	1.90394e+06	1.80249e+06	1.19709e+06	3	2	2	1	0	0	1	1	2
G3V6R7	2	2	124.25	0.447135	1.06588	Exercise	Control	3-oxoacyl-[acyl-carrier-protein] synthase, mitochondrial OS=Rattus norvegicus GN=Oxsm PE=3 SV=1	580451	583289	606073	583659	498986	610437	795575	848800	635826	627510	776696	557307	866472	743177	693546	543208	639936	511967	504130	519470	430032	458605	802259	696247	528495	541399	664791	609387	866472	886175	710322	528616	0	0	0	0	0	0	0	0	0
Q00972	2	2	87.69	0.449001	1.07084	Exercise	Control	[3-methyl-2-oxobutanoate dehydrogenase [lipoamide]] kinase, mitochondrial OS=Rattus norvegicus GN=Bckdk PE=1 SV=2	295298	292272	284006	311849	286039	399664	285742	344109	251360	362545	349709	321900	293599	356672	456084	284128	325561	256535	236235	277553	246511	300257	288143	282263	208929	312794	299324	351982	293599	425301	467116	276495	0	1	0	1	1	1	1	1	1
P02091;O88752	9	3	902.5	0.450288	1.4822	Exercise	Control	Hemoglobin subunit beta-1 OS=Rattus norvegicus GN=Hbb PE=1 SV=3	1.4098e+08	1.2562e+08	8.92281e+07	1.34594e+08	1.51941e+08	9.04544e+07	5.61726e+07	2.54771e+07	1.8566e+08	1.33122e+08	1.82689e+08	2.01107e+08	1.88487e+08	3.40482e+07	2.81508e+07	2.53934e+08	1.55428e+08	1.10259e+08	7.42197e+07	1.19792e+08	1.30944e+08	6.7956e+07	5.66445e+07	2.08982e+07	1.54319e+08	1.14854e+08	1.56367e+08	2.19901e+08	1.88487e+08	4.05996e+07	2.88317e+07	2.47112e+08	6	6	6	6	6	6	6	3	7
Q9JJW3	6	6	433.96	0.451571	1.0604	Exercise	Control	Up-regulated during skeletal muscle growth protein 5 OS=Rattus norvegicus GN=Usmg5 PE=1 SV=1	1.17545e+08	1.46246e+08	1.37137e+08	1.22399e+08	1.32451e+08	1.56319e+08	1.07393e+08	1.40132e+08	1.21219e+08	1.79589e+08	1.35611e+08	1.16423e+08	1.24528e+08	1.28675e+08	1.59382e+08	1.58198e+08	1.29591e+08	1.28364e+08	1.1407e+08	1.08938e+08	1.14148e+08	1.17439e+08	1.08295e+08	1.14947e+08	1.00756e+08	1.54944e+08	1.16072e+08	1.27303e+08	1.24528e+08	1.53434e+08	1.63237e+08	1.53948e+08	5	5	7	7	8	8	3	5	6
F1M7S9;D4A4B0	32	31	1783.69	0.452797	1.20046	Control	Exercise	Uncharacterized protein OS=Rattus norvegicus PE=4 SV=1	1.5192e+07	1.2926e+07	1.28844e+07	1.88017e+07	1.78092e+07	7.89411e+06	9.62755e+06	5.38787e+06	1.37021e+07	6.85186e+06	1.07554e+07	1.32629e+07	9.88378e+06	8.8555e+06	8.65295e+06	1.17727e+07	1.67489e+07	1.13455e+07	1.07172e+07	1.6734e+07	1.53482e+07	5.93064e+06	9.70844e+06	4.41952e+06	1.13891e+07	5.91161e+06	9.2058e+06	1.45023e+07	9.88378e+06	1.05594e+07	8.86225e+06	1.14565e+07	20	14	14	17	20	3	11	2	17
F1LN61	1	1	73.23	0.455696	1.29057	Control	Exercise	Uncharacterized protein (Fragment) OS=Rattus norvegicus PE=4 SV=1	210273	200398	324706	0	1.11108e+06	314142	174062	167275	188839	425363	283888	247973	44163.5	473187	144884	130339	231822	175895	270090	0	957544	236006	175524	137211	156962	366992	242986	271146	44163.5	564236	148388	126838	0	0	0	0	1	1	0	0	0
O88767;Q5BKC3	6	6	338.34	0.455917	1.04735	Exercise	Control	Protein DJ-1 OS=Rattus norvegicus GN=Park7 PE=1 SV=1	3.87246e+06	4.14628e+06	4.5729e+06	4.2786e+06	5.03923e+06	4.10745e+06	4.0915e+06	3.7462e+06	3.69771e+06	4.4194e+06	4.26444e+06	4.20129e+06	3.9039e+06	5.27683e+06	4.41131e+06	5.28263e+06	4.26932e+06	3.6393e+06	3.80372e+06	3.80805e+06	4.34286e+06	3.08582e+06	4.12588e+06	3.07291e+06	3.07351e+06	3.81294e+06	3.65003e+06	4.59389e+06	3.9039e+06	6.29217e+06	4.51801e+06	5.14071e+06	3	4	4	2	3	1	4	2	3
P08733;D3Z9K3;D3ZCI9	5	5	229.39	0.456139	1.20456	Control	Exercise	Myosin regulatory light chain 2, ventricular/cardiac muscle isoform OS=Rattus norvegicus GN=Myl2 PE=1 SV=2	6.55813e+06	4.31044e+06	5.35852e+06	6.15401e+06	4.75117e+06	1.6168e+06	4.30903e+06	2.35955e+06	5.4388e+06	2.10259e+06	2.20084e+06	5.91944e+06	4.15527e+06	2.63792e+06	2.49592e+06	4.45208e+06	7.23022e+06	3.78338e+06	4.4572e+06	5.47721e+06	4.09462e+06	1.21466e+06	4.34524e+06	1.93547e+06	4.52069e+06	1.81406e+06	1.88374e+06	6.47261e+06	4.15527e+06	3.1455e+06	2.5563e+06	4.33248e+06	4	3	3	3	3	1	2	2	4
Q8K3R4	1	1	45.5	0.456231	1.06932	Exercise	Control	30 kDa adipocyte complement-related protein OS=Rattus norvegicus GN=Adipoq PE=2 SV=1	523975	483348	534819	535449	540878	767589	574397	728748	690724	507830	817512	580602	647064	573035	484759	712712	577673	424247	444861	476562	466135	576669	579223	597772	574125	438142	699726	634859	647064	683296	496484	693566	0	0	0	0	0	1	0	1	0
G3V6D8	48	1	3570.2	0.460264	1.08966	Exercise	Control	Myosin-4 OS=Rattus norvegicus GN=Myh4 PE=4 SV=1	372001	306360	368095	482886	29141	520084	262852	138431	400982	127335	371332	437197	467631	289124	274899	333693	410125	268900	306180	429780	25114.1	390725	265060	113551	333294	109862	317831	478053	467631	344756	281548	324729	0	0	0	1	0	0	1	0	1
P07340	5	5	249.36	0.461162	1.04201	Control	Exercise	Sodium/potassium-transporting ATPase subunit beta-1 OS=Rattus norvegicus GN=Atp1b1 PE=1 SV=1	1.06126e+07	9.25576e+06	9.68039e+06	9.20498e+06	1.11476e+07	1.22847e+07	9.14092e+06	1.01152e+07	9.29291e+06	1.13225e+07	1.11957e+07	8.06878e+06	9.25707e+06	9.03459e+06	9.54249e+06	1.04449e+07	1.17002e+07	8.12401e+06	8.05212e+06	8.19264e+06	9.60713e+06	9.2292e+06	9.21772e+06	8.29722e+06	7.72421e+06	9.76876e+06	9.58266e+06	8.8228e+06	9.25707e+06	1.0773e+07	9.7733e+06	1.01644e+07	3	3	3	2	3	2	3	2	3
Q60587	24	24	1541.94	0.462541	1.06977	Exercise	Control	Trifunctional enzyme subunit beta, mitochondrial OS=Rattus norvegicus GN=Hadhb PE=1 SV=1	1.25195e+08	1.50846e+08	1.14009e+08	1.24045e+08	1.12657e+08	1.5157e+08	1.5756e+08	2.12244e+08	1.04882e+08	1.70747e+08	1.46714e+08	1.38011e+08	1.48467e+08	1.74097e+08	1.89306e+08	1.56007e+08	1.38025e+08	1.32401e+08	9.48326e+07	1.10403e+08	9.70891e+07	1.1387e+08	1.58884e+08	1.74097e+08	8.71771e+07	1.47316e+08	1.25576e+08	1.50908e+08	1.48467e+08	2.07596e+08	1.93885e+08	1.51816e+08	17	17	18	19	18	19	23	23	15
Q63377	2	2	95.78	0.463472	1.10491	Exercise	Control	Sodium/potassium-transporting ATPase subunit beta-3 OS=Rattus norvegicus GN=Atp1b3 PE=2 SV=1	545133	762713	883244	878355	1.03007e+06	835228	1.04961e+06	1.05276e+06	1.24538e+06	784017	1.32454e+06	726568	791146	1.08997e+06	698314	1.11547e+06	600999	669453	734680	781756	887729	627485	1.05843e+06	863554	1.03515e+06	676429	1.1337e+06	794466	791146	1.2997e+06	715205	1.0855e+06	0	0	1	0	1	1	1	0	0
B2RYK3	1	1	40.78	0.464126	1.09043	Exercise	Control	RCG56371 OS=Rattus norvegicus GN=Spr PE=2 SV=1	52067.3	40542.2	43742.3	45664.3	35938.3	53964.8	74246.2	55737.8	48887.8	82713.2	46727.3	47614.1	47088.4	40890.4	63932.1	60393.6	57403.2	35584.9	36384.7	40642.3	30972.1	40542.3	74870	45720.2	40635.2	71362.8	39994.9	52063.6	47088.4	48758.3	65478.5	58771.2	0	0	0	0	0	0	1	0	0
D4AB01	5	5	310.29	0.465044	1.08429	Exercise	Control	Histidine triad nucleotide binding protein 2 (Predicted), isoform CRA_a OS=Rattus norvegicus GN=Hint2 PE=4 SV=1	4.6392e+06	5.51623e+06	4.79284e+06	4.6966e+06	5.44912e+06	7.58629e+06	5.47318e+06	8.58099e+06	5.03738e+06	8.52845e+06	7.12139e+06	4.95124e+06	5.56782e+06	6.69899e+06	7.80793e+06	4.96042e+06	5.11464e+06	4.84173e+06	3.98667e+06	4.18009e+06	4.69611e+06	5.69938e+06	5.51917e+06	7.03875e+06	4.18704e+06	7.35812e+06	6.09535e+06	5.41393e+06	5.56782e+06	7.98798e+06	7.99679e+06	4.82717e+06	1	1	1	1	2	3	1	3	2
P52873	15	15	829.51	0.465979	1.0617	Exercise	Control	Pyruvate carboxylase, mitochondrial OS=Rattus norvegicus GN=Pc PE=1 SV=2	1.89585e+07	1.58301e+07	1.5985e+07	1.40694e+07	1.41213e+07	1.62989e+07	2.09576e+07	1.83319e+07	1.8538e+07	2.18172e+07	1.80309e+07	1.61731e+07	1.71001e+07	2.02542e+07	1.83189e+07	1.2623e+07	2.09014e+07	1.38945e+07	1.32963e+07	1.25221e+07	1.21699e+07	1.2245e+07	2.11337e+07	1.50372e+07	1.54087e+07	1.88233e+07	1.54331e+07	1.76845e+07	1.71001e+07	2.41514e+07	1.8762e+07	1.22839e+07	8	5	6	4	3	8	6	5	7
F1LTZ6	1	1	36.26	0.469875	1.07512	Control	Exercise	Protein RGD1559921 (Fragment) OS=Rattus norvegicus GN=RGD1559921 PE=4 SV=1	190691	249274	174064	154922	164261	169857	203214	129496	195930	152410	151369	183515	161213	163339	119313	208373	210234	218794	144786	137885	141562	127609	204921	106222	162856	131495	129560	200665	161213	194768	122199	202776	0	0	1	0	0	0	0	0	0
P38718;D4A0Q0	7	7	341.17	0.470913	1.04116	Control	Exercise	Mitochondrial pyruvate carrier 2 OS=Rattus norvegicus GN=Brp44 PE=2 SV=1	3.36182e+07	3.18204e+07	2.91298e+07	2.5915e+07	2.6453e+07	3.55962e+07	2.95589e+07	2.82189e+07	3.00931e+07	3.27377e+07	2.52919e+07	2.65855e+07	2.73156e+07	3.29491e+07	2.91574e+07	2.668e+07	3.70634e+07	2.79296e+07	2.42301e+07	2.30649e+07	2.27975e+07	2.67425e+07	2.98073e+07	2.31472e+07	2.50132e+07	2.82452e+07	2.16479e+07	2.90699e+07	2.73156e+07	3.92891e+07	2.98626e+07	2.59633e+07	3	2	3	1	1	3	2	2	3
Q6IMX3	16	16	1400.76	0.471784	1.06112	Control	Exercise	Acetyl-Coenzyme A dehydrogenase, short chain, isoform CRA_a OS=Rattus norvegicus GN=Acads PE=2 SV=1	1.70513e+08	2.17632e+08	1.37288e+08	1.38569e+08	1.34377e+08	1.82694e+08	1.66867e+08	1.78173e+08	1.43453e+08	1.84017e+08	1.42158e+08	1.54309e+08	1.59665e+08	1.4235e+08	1.72946e+08	1.50832e+08	1.87988e+08	1.91021e+08	1.14196e+08	1.23329e+08	1.15808e+08	1.37253e+08	1.68269e+08	1.4615e+08	1.19237e+08	1.58765e+08	1.21676e+08	1.68729e+08	1.59665e+08	1.69741e+08	1.77129e+08	1.4678e+08	18	18	16	16	16	16	19	21	16
F8WG21	30	29	2728.05	0.472432	1.02696	Exercise	Control	Succinate dehydrogenase [ubiquinone] flavoprotein subunit, mitochondrial OS=Rattus norvegicus GN=Sdha PE=4 SV=1	6.76098e+08	6.30992e+08	6.53582e+08	5.58762e+08	6.21676e+08	6.78359e+08	5.7381e+08	6.37186e+08	6.15908e+08	7.23995e+08	6.37552e+08	5.85216e+08	6.55076e+08	6.58663e+08	6.92621e+08	5.97055e+08	7.45385e+08	5.53838e+08	5.43648e+08	4.97311e+08	5.35768e+08	5.09633e+08	5.78631e+08	5.22666e+08	5.11939e+08	6.24644e+08	5.45695e+08	6.39905e+08	6.55076e+08	7.854e+08	7.09374e+08	5.81016e+08	49	46	46	47	42	48	45	53	54
F1M0K2	47	44	4223.31	0.474502	1.04509	Exercise	Control	Aconitate hydratase, mitochondrial (Fragment) OS=Rattus norvegicus GN=Aco2 PE=4 SV=1	1.48639e+09	1.51759e+09	1.50917e+09	1.38666e+09	1.32218e+09	1.85145e+09	1.42254e+09	1.78399e+09	1.35192e+09	1.8783e+09	1.63977e+09	1.40738e+09	1.49845e+09	1.68918e+09	1.85195e+09	1.51675e+09	1.63872e+09	1.33203e+09	1.25532e+09	1.23416e+09	1.13947e+09	1.39094e+09	1.43449e+09	1.46336e+09	1.1237e+09	1.62055e+09	1.40352e+09	1.5389e+09	1.49845e+09	2.01421e+09	1.89674e+09	1.47601e+09	74	73	77	67	71	79	74	81	72
D3ZZV1;Q6EIX2	4	4	235.67	0.476304	1.05955	Exercise	Control	Protein Magmas OS=Rattus norvegicus GN=Magmas PE=4 SV=1	1.24151e+06	2.63989e+06	1.82522e+06	1.02749e+06	1.16393e+06	1.6102e+06	2.33968e+06	1.73674e+06	1.51068e+06	1.8252e+06	1.5431e+06	2.11221e+06	1.78961e+06	2.35092e+06	1.57462e+06	1.68733e+06	1.36874e+06	2.3171e+06	1.51821e+06	914494	1.00309e+06	1.2097e+06	2.35934e+06	1.4246e+06	1.25567e+06	1.57473e+06	1.32077e+06	2.3096e+06	1.78961e+06	2.80327e+06	1.61271e+06	1.642e+06	1	2	1	1	2	2	1	2	1
B0BNN3	2	2	138.04	0.476947	1.72881	Exercise	Control	Carbonic anhydrase 1 OS=Rattus norvegicus GN=Ca1 PE=1 SV=1	564479	523249	366749	674598	540788	365786	229230	141964	707070	583700	1.08664e+06	941022	1.06974e+06	105062	89417.1	1.30712e+06	622328	459269	305061	600408	466057	274806	231156	116449	587712	503601	930077	1.02896e+06	1.06974e+06	125277	91580	1.27201e+06	1	1	0	2	0	0	0	0	2
B1H216;G3V8R3	10	8	846.27	0.478916	1.44481	Exercise	Control	Hemoglobin alpha, adult chain 2 OS=Rattus norvegicus GN=Hba-a2 PE=2 SV=1	2.09885e+08	1.93313e+08	1.4707e+08	2.18503e+08	2.13358e+08	1.43707e+08	1.02555e+08	5.18302e+07	2.4688e+08	1.85553e+08	2.55891e+08	3.09385e+08	3.398e+08	5.42742e+07	5.42028e+07	4.03689e+08	2.31394e+08	1.69675e+08	1.22332e+08	1.94472e+08	1.83874e+08	1.07963e+08	1.03416e+08	4.25149e+07	2.05205e+08	1.6009e+08	2.19023e+08	3.38297e+08	3.398e+08	6.47174e+07	5.55139e+07	3.92844e+08	14	13	11	14	13	11	9	8	13
F1M827	1	1	40.27	0.479792	1.05013	Exercise	Control	Protein MGC94335 OS=Rattus norvegicus GN=MGC94335 PE=4 SV=1	22987.6	30238.1	29545.7	22803.6	2355.09	41601.3	32917.8	41339.7	21639.7	28528.5	20638.6	36973	31656.5	34195	37683.6	23692	25343.4	26540.8	24576.1	20295.8	2029.65	31254	33194.4	33909.8	17986.8	24613.6	17665	40428.1	31656.5	40774.7	38595.1	23055.5	0	0	0	0	0	0	0	0	0
P62078	2	2	127.1	0.479882	1.07308	Exercise	Control	Mitochondrial import inner membrane translocase subunit Tim8 B OS=Rattus norvegicus GN=Timm8b PE=2 SV=1	556486	519851	541308	421431	471026	699026	555073	699215	412011	714469	541239	655218	595484	617806	752000	501359	613516	456286	450259	375083	405936	525160	559737	573547	342461	616425	463258	716448	595484	736682	770190	487890	2	2	1	1	1	2	1	1	2
D3Z9A9	10	1	1233.35	0.488519	1.17577	Exercise	Control	Uncharacterized protein OS=Rattus norvegicus PE=4 SV=1	251360	223062	151348	289029	174683	155251	228511	356275	252121	124791	418871	181869	242296	227031	445852	258266	277120	195787	125891	257243	150544	116636	230431	292242	209561	107666	358521	198865	242296	270715	456637	251328	0	0	0	0	0	0	0	1	0
Q4V8F9;F1LRD0	14	14	1000.66	0.490296	1.06129	Exercise	Control	Hydroxysteroid dehydrogenase-like protein 2 OS=Rattus norvegicus GN=Hsdl2 PE=2 SV=1	2.88212e+07	3.96861e+07	2.3892e+07	2.53029e+07	2.33461e+07	3.5581e+07	3.3021e+07	4.23766e+07	2.62644e+07	3.72143e+07	2.74341e+07	2.8368e+07	3.4892e+07	3.97755e+07	3.8939e+07	3.45872e+07	3.17749e+07	3.48335e+07	1.98733e+07	2.25202e+07	2.01199e+07	2.6731e+07	3.32984e+07	3.47603e+07	2.18308e+07	3.21075e+07	2.34814e+07	3.1019e+07	3.4892e+07	4.74289e+07	3.98808e+07	3.3658e+07	10	13	11	9	12	12	12	14	11
E9PTW6	1	1	85.45	0.490613	1.0429	Exercise	Control	Protein Mtx1 OS=Rattus norvegicus GN=Mtx1 PE=4 SV=1	1.06984e+06	917906	1.11299e+06	890865	1.13489e+06	1.34977e+06	933331	1.24094e+06	1.16966e+06	1.18469e+06	1.30199e+06	935858	1.03293e+06	1.0633e+06	1.26211e+06	1.07114e+06	1.17947e+06	805669	925779	792890	978062	1.01405e+06	941172	1.01791e+06	972213	1.02212e+06	1.1144e+06	1.02331e+06	1.03293e+06	1.26789e+06	1.29263e+06	1.04237e+06	1	1	1	1	1	1	1	1	1
Q642A4	3	3	196.53	0.49262	1.06448	Exercise	Control	UPF0598 protein C8orf82 homolog OS=Rattus norvegicus PE=2 SV=1	988672	1.48977e+06	1.27536e+06	1.23786e+06	1.02985e+06	1.86606e+06	1.32982e+06	1.7891e+06	1.27725e+06	2.05843e+06	1.48162e+06	1.19148e+06	1.33435e+06	1.51955e+06	1.58198e+06	1.27154e+06	1.08999e+06	1.30761e+06	1.06084e+06	1.10172e+06	887539	1.40192e+06	1.34099e+06	1.46755e+06	1.06164e+06	1.77596e+06	1.26815e+06	1.30283e+06	1.33435e+06	1.81193e+06	1.62025e+06	1.23738e+06	3	3	3	3	2	2	2	2	3
P63031;F1LXF3	6	6	318.81	0.494174	1.07943	Exercise	Control	Mitochondrial pyruvate carrier 1 OS=Rattus norvegicus GN=Brp44l PE=2 SV=1	2.05453e+07	1.54687e+07	2.09623e+07	9.60097e+06	1.98056e+07	1.37411e+07	2.10911e+07	1.42622e+07	2.2258e+07	1.96737e+07	1.20147e+07	2.12551e+07	1.81161e+07	2.115e+07	1.79458e+07	1.38253e+07	2.26508e+07	1.35773e+07	1.74364e+07	8.54509e+06	1.70687e+07	1.03233e+07	2.12683e+07	1.16989e+07	1.85007e+07	1.6974e+07	1.02836e+07	2.32413e+07	1.81161e+07	2.52196e+07	1.83799e+07	1.34539e+07	6	5	6	2	2	2	3	2	7
Q5RKI8	9	9	576.14	0.495068	1.06036	Exercise	Control	ATP-binding cassette sub-family B member 8, mitochondrial OS=Rattus norvegicus GN=Abcb8 PE=2 SV=1	5.26788e+06	5.98748e+06	5.1257e+06	3.29432e+06	3.06062e+06	4.33583e+06	4.04616e+06	4.59713e+06	5.76764e+06	5.85075e+06	4.38865e+06	3.69495e+06	4.33077e+06	5.02767e+06	4.72353e+06	4.08684e+06	5.80774e+06	5.25536e+06	4.26355e+06	2.93202e+06	2.63768e+06	3.25739e+06	4.08015e+06	3.7709e+06	4.79403e+06	5.04788e+06	3.75634e+06	4.04024e+06	4.33077e+06	5.99507e+06	4.83778e+06	3.97705e+06	4	1	6	2	3	5	4	4	4
Q5XIH1	2	2	111.36	0.499225	1.07945	Control	Exercise	Asporin OS=Rattus norvegicus GN=Aspn PE=2 SV=1	468287	491773	628345	579610	363451	320157	420935	446734	625701	347341	497323	458171	346733	312908	490677	366688	516278	431641	522655	515867	313226	240526	424471	366444	520079	299677	425670	500987	346733	373116	502545	356838	0	0	1	0	1	0	0	0	1
F8WFW6	1	1	37.84	0.500894	1.16058	Control	Exercise	40S ribosomal protein S16 (Fragment) OS=Rattus norvegicus GN=Rps16 PE=3 SV=1	113686	69555.8	65419.7	78379.4	89922.5	45570.3	79420	33959.5	84274.6	58070.5	61648	72185.3	59831	49929.9	57661.6	52627.6	125336	61050.9	54415.9	69759.5	77496.3	34235.7	80087.3	27856.1	70048.5	50101.7	52765.8	78931	59831	59537.2	59056.3	51213.8	1	0	0	0	0	0	0	0	0
D3ZVB7	1	1	67.36	0.500912	1.1091	Control	Exercise	Osteoglycin (Predicted) OS=Rattus norvegicus GN=Ogn PE=4 SV=1	211755	165477	260906	395420	340430	117656	101539	113129	418172	79866.5	104937	175192	136030	88546.1	95761.7	439963	233456	145243	217021	351933	293387	88392	102392	92796.9	347582	68906.7	89817.5	191564	136030	105584	98078	428144	0	0	0	0	0	0	0	0	1
F1LVD7;Q7TPJ4	4	4	318.04	0.502703	1.05354	Control	Exercise	Protein Ldhd (Fragment) OS=Rattus norvegicus GN=Ldhd PE=4 SV=1	2.13831e+06	2.27825e+06	2.06281e+06	2.04468e+06	1.99071e+06	3.0687e+06	2.08559e+06	2.42482e+06	2.34117e+06	1.99167e+06	1.9909e+06	2.14831e+06	2.49208e+06	2.22084e+06	1.43571e+06	2.55371e+06	2.35745e+06	1.99968e+06	1.71584e+06	1.81982e+06	1.71562e+06	2.30543e+06	2.10311e+06	1.98901e+06	1.94596e+06	1.71836e+06	1.70405e+06	2.34907e+06	2.49208e+06	2.64817e+06	1.47043e+06	2.48511e+06	2	3	2	2	1	2	2	2	2
P27139	2	2	83.21	0.503109	1.71617	Exercise	Control	Carbonic anhydrase 2 OS=Rattus norvegicus GN=Ca2 PE=1 SV=2	181592	132532	104194	171362	196407	88778.6	77087.1	45425.9	273751	118628	247838	352933	256552	24978.6	35483.5	401509	200201	116327	86667.9	152516	169266	66697	77734.8	37261.6	227540	102349	212130	385915	256552	29784.9	36341.8	390722	0	0	0	0	0	0	0	0	1
D4A5H3	1	1	59.47	0.50576	1.06669	Control	Exercise	Uncharacterized protein OS=Rattus norvegicus PE=4 SV=1	632987	817831	861849	737141	872392	836782	911872	521532	907017	701274	675542	539857	752451	719170	619816	890095	697856	717831	716884	656073	751837	628652	919534	427799	753907	605041	578211	590307	752451	857550	634809	866184	1	0	0	1	1	0	1	0	1
F1LQA7	1	1	39.53	0.506282	1.05651	Control	Exercise	Choline transporter-like protein 2 OS=Rattus norvegicus GN=Slc44a2 PE=4 SV=1	359068	479731	344454	463499	531546	410817	497442	381323	331256	521504	331722	416608	443256	426754	356797	454484	395866	421072	286516	412525	458092	308636	501621	312788	275338	449940	283928	455540	443256	508868	365427	442274	1	0	0	0	0	0	0	0	0
G3V945;D3ZWV7;P51650	20	20	1318.9	0.507154	1.05603	Exercise	Control	Aldehyde dehydrogenase family 5, subfamily A1 OS=Rattus norvegicus GN=Aldh5a1 PE=3 SV=1	5.67531e+07	5.50785e+07	4.41665e+07	3.53214e+07	4.59691e+07	5.92098e+07	5.33985e+07	4.97518e+07	3.78869e+07	6.45851e+07	5.93338e+07	4.97486e+07	5.25339e+07	5.68399e+07	5.12388e+07	4.98753e+07	6.25693e+07	4.83438e+07	3.67376e+07	3.14368e+07	3.96167e+07	4.44828e+07	5.38471e+07	4.081e+07	3.14913e+07	5.57223e+07	5.07851e+07	5.43976e+07	5.25339e+07	6.77768e+07	5.24782e+07	4.85355e+07	17	15	13	12	12	13	16	15	12
P04041	4	4	202.36	0.508367	1.05821	Exercise	Control	Glutathione peroxidase 1 OS=Rattus norvegicus GN=Gpx1 PE=1 SV=4	6.10892e+06	5.65743e+06	5.7738e+06	6.1268e+06	7.14295e+06	7.89256e+06	7.13964e+06	8.50327e+06	5.87977e+06	1.00333e+07	6.26584e+06	6.99954e+06	6.24679e+06	7.58664e+06	7.06951e+06	7.42763e+06	6.73498e+06	4.96567e+06	4.80263e+06	5.45299e+06	6.15588e+06	5.92947e+06	7.19963e+06	6.97499e+06	4.88723e+06	8.65647e+06	5.36307e+06	7.65365e+06	6.24679e+06	9.04642e+06	7.24051e+06	7.2281e+06	3	1	1	2	3	2	2	0	2
Q68FY0	22	20	1887.07	0.509914	1.03994	Exercise	Control	Cytochrome b-c1 complex subunit 1, mitochondrial OS=Rattus norvegicus GN=Uqcrc1 PE=1 SV=1	9.96323e+08	1.00212e+09	9.51414e+08	8.11319e+08	8.37526e+08	1.07555e+09	8.98157e+08	1.00551e+09	9.39571e+08	1.19e+09	9.63425e+08	8.70308e+08	8.3889e+08	1.0286e+09	1.11767e+09	9.32137e+08	1.09843e+09	8.79583e+08	7.91384e+08	7.22093e+08	7.2179e+08	8.08034e+08	9.05704e+08	8.24789e+08	7.80965e+08	1.0267e+09	8.24616e+08	9.51638e+08	8.3889e+08	1.22652e+09	1.1447e+09	9.07096e+08	36	40	38	34	38	38	39	32	36
Q9NQR8;D4ABZ8	5	5	315.39	0.510948	1.0342	Exercise	Control	NADH dehydrogenase [ubiquinone] 1 alpha subcomplex assembly factor 4 OS=Rattus norvegicus GN=Ndufaf4 PE=1 SV=1	6.79461e+06	5.86615e+06	6.18356e+06	4.83201e+06	4.61125e+06	5.15768e+06	4.99853e+06	5.5372e+06	5.48365e+06	6.63945e+06	6.29397e+06	5.73049e+06	5.23682e+06	5.35106e+06	5.53254e+06	5.2173e+06	7.49094e+06	5.14887e+06	5.14347e+06	4.3006e+06	3.97403e+06	3.87483e+06	5.04053e+06	4.54201e+06	4.55798e+06	5.72834e+06	5.38715e+06	6.266e+06	5.23682e+06	6.38069e+06	5.66636e+06	5.07715e+06	3	3	3	3	2	3	3	2	4
Q8VID1	5	5	396.02	0.511676	1.07709	Control	Exercise	Dehydrogenase/reductase SDR family member 4 OS=Rattus norvegicus GN=Dhrs4 PE=2 SV=2	1.1904e+07	1.5394e+07	1.61323e+07	1.13267e+07	1.61915e+07	2.29217e+07	1.80772e+07	1.56815e+07	1.37905e+07	1.348e+07	1.73328e+07	7.72405e+06	1.83781e+07	1.8499e+07	1.07594e+07	1.85299e+07	1.3124e+07	1.35117e+07	1.34188e+07	1.0081e+07	1.3954e+07	1.72204e+07	1.8229e+07	1.28631e+07	1.14626e+07	1.16302e+07	1.48356e+07	8.44586e+06	1.83781e+07	2.20584e+07	1.10196e+07	1.80321e+07	3	4	4	3	3	5	3	3	3
Q64428;F1M9X9	35	34	3102.14	0.515042	1.05124	Exercise	Control	Trifunctional enzyme subunit alpha, mitochondrial OS=Rattus norvegicus GN=Hadha PE=1 SV=2	4.57098e+08	6.02242e+08	4.00265e+08	4.12804e+08	4.06326e+08	5.41778e+08	5.63777e+08	6.8619e+08	4.03946e+08	6.25968e+08	5.07121e+08	4.83795e+08	5.00096e+08	5.98663e+08	6.05918e+08	5.53549e+08	5.03943e+08	5.28603e+08	3.32939e+08	3.67405e+08	3.50176e+08	4.07023e+08	5.68514e+08	5.62862e+08	3.35758e+08	5.40068e+08	4.34056e+08	5.29005e+08	5.00096e+08	7.13855e+08	6.20574e+08	5.38679e+08	51	51	40	47	39	50	55	62	45
D4AAE9	1	1	46.74	0.517637	1.08088	Exercise	Control	Protein Cisd2 OS=Rattus norvegicus GN=Cisd2 PE=4 SV=1	679178	982865	892973	554277	311902	281799	504618	327318	727259	761592	908027	674307	558995	487719	417330	366483	748782	862685	742772	493320	268801	211708	508858	268490	604493	657082	777200	737321	558995	581563	427425	356638	1	0	0	0	0	0	1	0	0
P22062;F1M7U8	3	3	229.55	0.520394	1.03321	Exercise	Control	Protein-L-isoaspartate(D-aspartate) O-methyltransferase OS=Rattus norvegicus GN=Pcmt1 PE=1 SV=2	3.06521e+06	3.23744e+06	2.65153e+06	2.71137e+06	2.20937e+06	3.07398e+06	2.28728e+06	2.72284e+06	2.83724e+06	3.42185e+06	2.63007e+06	2.65877e+06	2.7162e+06	2.70479e+06	2.86645e+06	2.85284e+06	3.37933e+06	2.84159e+06	2.20553e+06	2.41318e+06	1.90406e+06	2.3094e+06	2.30649e+06	2.23347e+06	2.35829e+06	2.95228e+06	2.25113e+06	2.90723e+06	2.7162e+06	3.22523e+06	2.93579e+06	2.7762e+06	3	2	3	2	2	1	1	2	3
D4ADG2	6	6	360.95	0.523511	1.11013	Exercise	Control	Protein LOC100363222 OS=Rattus norvegicus GN=LOC100363222 PE=3 SV=1	1.78187e+06	2.70797e+06	1.38207e+06	1.35781e+06	1.77138e+06	3.40593e+06	2.55814e+06	2.4288e+06	1.29588e+06	2.41014e+06	2.02109e+06	2.25958e+06	2.85997e+06	3.33954e+06	3.36406e+06	1.75922e+06	1.96448e+06	2.37685e+06	1.1496e+06	1.20848e+06	1.5266e+06	2.55879e+06	2.57963e+06	1.99227e+06	1.07713e+06	2.07941e+06	1.7299e+06	2.47074e+06	2.85997e+06	3.98211e+06	3.44543e+06	1.71196e+06	1	3	2	2	2	2	1	2	2
Q9QYU2	1	1	77.55	0.52451	1.04457	Control	Exercise	Elongation factor Ts, mitochondrial OS=Rattus norvegicus GN=Tsfm PE=2 SV=1	1.35225e+06	1.28998e+06	1.84399e+06	1.60448e+06	1.60534e+06	1.75685e+06	1.41252e+06	1.69964e+06	1.2224e+06	2.19942e+06	1.66995e+06	1.344e+06	1.44894e+06	1.59907e+06	1.26119e+06	1.28388e+06	1.49083e+06	1.13224e+06	1.53383e+06	1.42802e+06	1.3835e+06	1.31988e+06	1.42438e+06	1.39417e+06	1.01605e+06	1.8976e+06	1.42935e+06	1.4696e+06	1.44894e+06	1.90675e+06	1.2917e+06	1.24939e+06	1	0	1	1	1	1	1	1	1
P63039;D3Z9X1;D3ZVX2;D4ABH6;F1M6U4	31	30	2394.74	0.526202	1.05485	Exercise	Control	60 kDa heat shock protein, mitochondrial OS=Rattus norvegicus GN=Hspd1 PE=1 SV=1	2.08898e+08	2.4544e+08	1.89933e+08	1.86683e+08	1.87162e+08	2.589e+08	2.28465e+08	2.57043e+08	1.86231e+08	3.06242e+08	2.33461e+08	2.02702e+08	2.31778e+08	2.75504e+08	2.15764e+08	2.0751e+08	2.30306e+08	2.15428e+08	1.57986e+08	1.66152e+08	1.61298e+08	1.94505e+08	2.30384e+08	2.10845e+08	1.54794e+08	2.64217e+08	1.99824e+08	2.21644e+08	2.31778e+08	3.28515e+08	2.20983e+08	2.01935e+08	30	29	26	26	24	36	27	33	24
P00507;F1LXI9;F1LZD6	26	25	2178.28	0.526281	1.0299	Exercise	Control	Aspartate aminotransferase, mitochondrial OS=Rattus norvegicus GN=Got2 PE=1 SV=2	1.55361e+09	1.58151e+09	1.43193e+09	1.30302e+09	1.41073e+09	1.61303e+09	1.43724e+09	1.60152e+09	1.39471e+09	1.78357e+09	1.62658e+09	1.36268e+09	1.41526e+09	1.55207e+09	1.664e+09	1.49056e+09	1.71283e+09	1.38813e+09	1.19107e+09	1.15972e+09	1.21579e+09	1.21182e+09	1.44932e+09	1.31368e+09	1.15927e+09	1.53881e+09	1.39223e+09	1.49002e+09	1.41526e+09	1.85072e+09	1.70424e+09	1.45052e+09	56	51	55	46	48	51	53	57	51
P18886;D3ZK52;D3ZUG6	29	3	1935.84	0.526571	1.0884	Control	Exercise	Carnitine O-palmitoyltransferase 2, mitochondrial OS=Rattus norvegicus GN=Cpt2 PE=1 SV=1	9.71867e+06	2.19864e+07	1.95871e+07	1.551e+07	1.86374e+07	1.97557e+07	1.96816e+07	1.91782e+07	1.91117e+07	9.86635e+06	1.63616e+07	1.59506e+07	1.75311e+07	1.80534e+07	1.68311e+07	1.86494e+07	1.07147e+07	1.9298e+07	1.62925e+07	1.38042e+07	1.60619e+07	1.4842e+07	1.9847e+07	1.57313e+07	1.58855e+07	8.51242e+06	1.40043e+07	1.74411e+07	1.75311e+07	2.15271e+07	1.72383e+07	1.81484e+07	2	2	3	1	3	3	3	2	3
B2RYT9	2	2	109.51	0.529459	1.07498	Control	Exercise	Translational activator of cytochrome c oxidase 1 OS=Rattus norvegicus GN=Taco1 PE=2 SV=1	464354	485308	292554	382893	391323	623443	416124	497461	289497	492923	504380	340684	436582	374208	525784	341532	511941	425967	243345	340783	337246	468377	419620	408053	240628	425281	431710	372520	436582	446211	538502	332357	1	0	0	0	0	1	0	0	1
Q80W89	5	5	603.61	0.530125	1.042	Exercise	Control	NADH dehydrogenase [ubiquinone] 1 alpha subcomplex subunit 11 OS=Rattus norvegicus GN=Ndufa11 PE=2 SV=1	2.20352e+08	1.84794e+08	1.72695e+08	1.44799e+08	1.51902e+08	1.83721e+08	1.68895e+08	1.75939e+08	1.98292e+08	2.23323e+08	1.73097e+08	1.55796e+08	1.69126e+08	1.84338e+08	2.01477e+08	1.56582e+08	2.42934e+08	1.62198e+08	1.43647e+08	1.28875e+08	1.30911e+08	1.38025e+08	1.70314e+08	1.44318e+08	1.64819e+08	1.92678e+08	1.48158e+08	1.70356e+08	1.69126e+08	2.19808e+08	2.06351e+08	1.52376e+08	16	11	10	9	9	9	7	6	9
Q4FZT8	4	4	187.01	0.535686	1.06327	Control	Exercise	SPRY domain-containing protein 4 OS=Rattus norvegicus GN=Spryd4 PE=2 SV=1	1.01438e+06	1.0283e+06	862213	843909	784363	986158	785699	1.38625e+06	670865	1.1003e+06	968591	683412	1.10682e+06	929465	994974	779216	1.11834e+06	902565	717187	751099	675973	740875	792300	1.1371e+06	557619	949306	829038	747276	1.10682e+06	1.10831e+06	1.01904e+06	758284	2	3	2	1	1	2	1	1	2
F1LNV4	13	13	856.13	0.536292	1.04757	Exercise	Control	ATP-binding cassette sub-family B member 7, mitochondrial (Fragment) OS=Rattus norvegicus GN=Abcb7 PE=3 SV=1	1.3807e+07	1.54446e+07	1.18622e+07	9.69997e+06	1.14435e+07	1.31332e+07	1.2064e+07	1.16388e+07	1.36928e+07	1.65163e+07	1.29733e+07	1.03152e+07	1.14578e+07	1.41924e+07	1.31711e+07	1.14878e+07	1.5222e+07	1.35561e+07	9.86694e+06	8.6332e+06	9.86215e+06	9.86662e+06	1.21653e+07	9.54698e+06	1.13814e+07	1.42498e+07	1.11041e+07	1.12791e+07	1.14578e+07	1.69232e+07	1.34897e+07	1.11792e+07	9	8	8	7	5	6	9	5	10
D3ZEA6	2	1	77.02	0.537867	1.12316	Control	Exercise	Actin-related protein 2 OS=Rattus norvegicus GN=Actr2 PE=3 SV=1	274635	227050	374710	344235	619585	512392	212334	512817	299241	553082	561992	379014	312175	199168	283199	152394	302780	199287	311683	306377	533966	384946	214118	420649	248728	477185	481021	414433	312175	237491	290049	148300	1	1	1	1	1	0	0	0	0
Q5U3Z3	1	1	49.07	0.538317	1.04607	Exercise	Control	Isochorismatase domain-containing protein 2, mitochondrial OS=Rattus norvegicus GN=Isoc2 PE=2 SV=1	846054	675564	789728	579700	529304	607854	624642	591736	599261	810052	718317	764497	666232	778604	595625	553599	932759	592960	656894	515946	456160	456665	629890	485385	498102	698891	614823	835939	666232	928419	610032	538727	0	0	0	0	0	0	0	0	0
Q5XIE6	14	14	1200.49	0.538483	1.04875	Exercise	Control	3-hydroxyisobutyryl-CoA hydrolase, mitochondrial OS=Rattus norvegicus GN=Hibch PE=1 SV=2	2.89014e+07	2.95876e+07	2.55658e+07	2.15848e+07	2.1086e+07	2.75981e+07	2.46415e+07	2.88421e+07	2.73092e+07	3.65758e+07	2.27879e+07	2.28564e+07	2.59582e+07	2.7809e+07	2.56251e+07	2.90169e+07	3.18633e+07	2.59697e+07	2.12656e+07	1.9211e+07	1.81722e+07	2.07337e+07	2.48485e+07	2.36583e+07	2.26992e+07	3.15567e+07	1.95047e+07	2.49923e+07	2.59582e+07	3.31599e+07	2.6245e+07	2.82374e+07	16	10	11	9	13	13	12	13	10
O89035	1	1	34.27	0.538796	1.06484	Exercise	Control	Mitochondrial dicarboxylate carrier OS=Rattus norvegicus GN=Slc25a10 PE=2 SV=1	112994	129725	119145	53976	82921.8	96488.4	318490	91986.5	162329	156376	169051	77043.6	92916.7	175416	159734	78070.3	124574	113863	99104.1	48039.9	71463	72489.2	321166	75454	134927	134917	144694	84243.3	92916.7	209168	163597	75973.1	0	0	0	0	0	0	1	0	0
F1M614;F1LXY9;F1LZ10	11	11	622.36	0.541796	1.11304	Exercise	Control	Protein Lama2 (Fragment) OS=Rattus norvegicus GN=Lama2 PE=4 SV=1	1.93588e+06	2.41326e+06	2.46995e+06	2.90916e+06	3.96987e+06	5.94771e+06	2.45187e+06	1.9931e+06	5.04736e+06	1.71453e+06	3.47101e+06	2.27098e+06	2.94915e+06	3.33924e+06	2.84937e+06	5.17233e+06	2.13427e+06	2.11818e+06	2.0545e+06	2.58922e+06	3.42128e+06	4.46836e+06	2.47247e+06	1.63488e+06	4.19534e+06	1.47925e+06	2.97092e+06	2.4832e+06	2.94915e+06	3.98176e+06	2.91829e+06	5.03338e+06	1	3	1	3	2	2	1	0	7
Q5SGE0;F1LM33	31	31	1737.32	0.542575	1.03802	Exercise	Control	Leucine-rich PPR motif-containing protein, mitochondrial OS=Rattus norvegicus GN=Lrpprc PE=1 SV=1	2.49645e+07	2.86775e+07	2.13283e+07	2.0058e+07	2.16625e+07	2.70697e+07	2.39566e+07	2.86441e+07	2.33084e+07	2.83556e+07	2.28916e+07	2.14678e+07	2.42242e+07	2.93405e+07	2.83025e+07	2.59362e+07	2.75229e+07	2.5171e+07	1.77408e+07	1.78521e+07	1.8669e+07	2.03367e+07	2.41578e+07	2.3496e+07	1.93738e+07	2.44645e+07	1.95934e+07	2.3474e+07	2.42242e+07	3.4986e+07	2.89871e+07	2.52394e+07	16	19	14	11	12	18	22	19	16
D4A3T9	4	4	288.44	0.542809	1.03901	Exercise	Control	Calsequestrin OS=Rattus norvegicus GN=Casq1 PE=3 SV=1	5.20715e+07	6.2254e+07	6.53254e+07	7.90503e+07	5.57111e+07	4.27706e+07	8.52623e+07	3.59626e+07	6.31127e+07	5.71815e+07	7.59177e+07	6.60593e+07	5.72766e+07	6.61607e+07	5.3897e+07	5.74663e+07	5.74079e+07	5.46419e+07	5.43375e+07	7.03567e+07	4.80125e+07	3.21324e+07	8.59787e+07	2.94991e+07	5.24588e+07	4.93346e+07	6.49796e+07	7.22325e+07	5.72766e+07	7.88911e+07	5.52007e+07	5.59225e+07	5	5	4	6	7	5	6	5	7
G3V7I0;Q9Z0V6	9	9	825.68	0.543819	1.03154	Control	Exercise	Peroxiredoxin 3 OS=Rattus norvegicus GN=Prdx3 PE=4 SV=1	1.8847e+08	2.17071e+08	2.01432e+08	1.73523e+08	1.66716e+08	1.93546e+08	1.75339e+08	2.01626e+08	1.78628e+08	2.38731e+08	1.81167e+08	1.61813e+08	1.69577e+08	1.85769e+08	2.01115e+08	1.54522e+08	2.07785e+08	1.90528e+08	1.6755e+08	1.54439e+08	1.43677e+08	1.45406e+08	1.76812e+08	1.65388e+08	1.48474e+08	2.05971e+08	1.55064e+08	1.76934e+08	1.69577e+08	2.21513e+08	2.0598e+08	1.50371e+08	9	15	10	12	15	15	12	15	12
Q5HZA9	4	4	207.98	0.545673	1.05634	Exercise	Control	Transmembrane protein 126A OS=Rattus norvegicus GN=Tmem126a PE=2 SV=1	4.08012e+06	3.71319e+06	3.66808e+06	2.42996e+06	3.38858e+06	3.39359e+06	4.97401e+06	4.19889e+06	3.78406e+06	3.99453e+06	2.86172e+06	3.65366e+06	3.9914e+06	5.23763e+06	4.45121e+06	3.55383e+06	4.49826e+06	3.25916e+06	3.0511e+06	2.16272e+06	2.92032e+06	2.54951e+06	5.0158e+06	3.44423e+06	3.14529e+06	3.44638e+06	2.44941e+06	3.99509e+06	3.9914e+06	6.24543e+06	4.55888e+06	3.45836e+06	2	3	1	1	3	2	3	1	3
P54313;D4A752;O35353;P52287;P54311	4	3	227.71	0.548453	1.05611	Exercise	Control	Guanine nucleotide-binding protein G(I)/G(S)/G(T) subunit beta-2 OS=Rattus norvegicus GN=Gnb2 PE=1 SV=4	489301	510976	610148	483224	692872	519842	510445	421947	537690	617608	688075	589976	448506	676308	482752	435690	539446	448497	507519	430081	597125	390543	514734	346111	446924	532856	588938	645110	448506	806441	494428	423985	2	2	2	1	2	2	1	1	1
P04182	10	9	540.95	0.548813	1.0346	Control	Exercise	Ornithine aminotransferase, mitochondrial OS=Rattus norvegicus GN=Oat PE=1 SV=1	1.01336e+07	9.07118e+06	9.22076e+06	7.94878e+06	8.03558e+06	1.07446e+07	7.91211e+06	9.1171e+06	9.539e+06	9.72534e+06	9.46519e+06	8.30903e+06	7.60274e+06	8.69552e+06	8.6976e+06	7.73508e+06	1.11721e+07	7.962e+06	7.66981e+06	7.0746e+06	6.92515e+06	8.07213e+06	7.97858e+06	7.47851e+06	7.92875e+06	8.39077e+06	8.10146e+06	9.0855e+06	7.60274e+06	1.03687e+07	8.90798e+06	7.52728e+06	6	5	5	4	4	5	7	6	6
D3ZQN7;D3ZIX0	5	5	299.4	0.551335	1.17731	Exercise	Control	Uncharacterized protein OS=Rattus norvegicus GN=Lamb1 PE=4 SV=1	538345	1.0067e+06	615678	813455	1.34358e+06	1.63454e+06	695047	729731	1.68707e+06	635146	965196	474364	753660	1.1452e+06	1.04061e+06	1.98386e+06	593515	883604	512119	723994	1.15791e+06	1.22799e+06	700887	598578	1.40228e+06	547987	826132	518693	753660	1.36556e+06	1.06578e+06	1.93057e+06	1	1	1	0	2	3	1	1	3
G3V640	10	10	769.63	0.552072	1.05912	Exercise	Control	Mitochondrial import inner membrane translocase subunit TIM44 OS=Rattus norvegicus GN=Timm44 PE=4 SV=1	1.19323e+07	8.88149e+06	5.95237e+06	8.48316e+06	7.98241e+06	9.36825e+06	8.11109e+06	1.0114e+07	9.16264e+06	1.20673e+07	6.46421e+06	8.50044e+06	8.80384e+06	1.04769e+07	8.75184e+06	1.07853e+07	1.31551e+07	7.79551e+06	4.95117e+06	7.55021e+06	6.87934e+06	7.03812e+06	8.17923e+06	8.29625e+06	7.61593e+06	1.04113e+07	5.53285e+06	9.2948e+06	8.80384e+06	1.24928e+07	8.96354e+06	1.04956e+07	7	6	7	5	6	5	8	7	8
Q4V8H8;Q8R491	3	3	178.42	0.554144	1.04027	Exercise	Control	EH domain-containing protein 2 OS=Rattus norvegicus GN=Ehd2 PE=1 SV=1	2.74141e+06	2.16618e+06	2.87741e+06	2.43472e+06	2.73152e+06	3.17051e+06	2.31351e+06	3.05324e+06	3.22456e+06	2.53474e+06	3.48993e+06	2.35961e+06	2.61598e+06	2.65259e+06	2.72188e+06	2.75459e+06	3.02235e+06	1.90131e+06	2.39342e+06	2.16696e+06	2.35406e+06	2.38192e+06	2.33295e+06	2.50449e+06	2.68023e+06	2.18691e+06	2.98711e+06	2.58012e+06	2.61598e+06	3.16299e+06	2.78771e+06	2.68059e+06	3	1	2	1	2	3	3	3	3
P05982	1	1	55.11	0.555323	1.05643	Control	Exercise	NAD(P)H dehydrogenase [quinone] 1 OS=Rattus norvegicus GN=Nqo1 PE=1 SV=4	157583	123626	210241	123133	111246	115390	209408	193805	166115	101134	248669	116822	54371	181842	96750.5	212261	173733	108510	174878	109591	95873.2	86689.1	211168	158973	138074	87256.1	212841	127739	54371	216831	99090.8	206559	1	0	0	0	0	0	0	0	0
F1M8K0	1	1	56.64	0.556547	1.04208	Control	Exercise	Protein Dag1 OS=Rattus norvegicus GN=Dag1 PE=4 SV=1	148904	156019	168257	185167	148920	216733	152795	145007	174441	149050	165354	134882	147079	192842	147761	157024	164164	136942	139956	164803	128341	162826	154078	118945	144995	128596	141530	147486	147079	229947	151335	152806	0	1	0	0	0	1	0	1	0
F1LSP2	2	2	83.07	0.557665	1.05735	Exercise	Control	Uncharacterized protein (Fragment) OS=Rattus norvegicus PE=3 SV=1	404716	494843	303191	551698	537891	544808	401457	662502	477323	512939	529117	331442	521941	563300	636946	551813	446192	434336	252194	491024	463561	409300	404830	543432	396748	442550	452883	362415	521941	671688	652353	536989	0	0	0	0	1	1	1	0	0
Q9QZ76	8	8	780.03	0.559573	1.27132	Control	Exercise	Myoglobin OS=Rattus norvegicus GN=Mb PE=1 SV=3	4.99893e+07	3.26279e+07	4.07723e+07	4.06216e+07	4.77249e+07	1.26441e+07	2.85436e+07	8.90629e+06	3.76601e+07	1.45272e+07	1.74408e+07	3.94542e+07	2.17547e+07	2.50122e+07	1.79649e+07	3.2138e+07	5.51123e+07	2.86383e+07	3.39143e+07	3.61542e+07	4.11299e+07	9.4992e+06	2.87834e+07	7.30558e+06	3.13028e+07	1.25337e+07	1.4928e+07	4.31412e+07	2.17547e+07	2.9825e+07	1.83995e+07	3.12746e+07	12	9	12	11	13	2	9	2	8
Q5XIJ4	5	5	269.13	0.561579	1.05036	Control	Exercise	Protein FAM210A OS=Rattus norvegicus GN=Fam210a PE=2 SV=1	8.72673e+06	8.46843e+06	8.1259e+06	7.27582e+06	9.51834e+06	1.23131e+07	7.68251e+06	9.72746e+06	7.64838e+06	9.02857e+06	8.4248e+06	8.48537e+06	8.94896e+06	8.769e+06	1.02114e+07	6.87766e+06	9.62106e+06	7.43295e+06	6.7591e+06	6.47565e+06	8.20302e+06	9.25049e+06	7.74706e+06	7.97917e+06	6.35729e+06	7.78962e+06	7.21097e+06	9.27832e+06	8.94896e+06	1.04563e+07	1.04584e+07	6.6929e+06	3	5	4	5	4	5	6	5	3
B2GV15	11	11	757.81	0.562367	1.05102	Exercise	Control	Dihydrolipoamide branched chain transacylase E2 OS=Rattus norvegicus GN=Dbt PE=2 SV=1	1.33752e+07	1.54815e+07	1.2857e+07	1.22045e+07	1.10545e+07	1.53108e+07	1.67303e+07	2.03125e+07	1.12324e+07	1.61165e+07	1.39876e+07	1.52685e+07	1.78218e+07	1.64454e+07	1.91233e+07	1.3317e+07	1.47459e+07	1.35885e+07	1.06944e+07	1.08623e+07	9.52689e+06	1.15026e+07	1.68708e+07	1.66618e+07	9.3363e+06	1.39049e+07	1.19723e+07	1.66954e+07	1.78218e+07	1.96097e+07	1.95858e+07	1.29593e+07	6	4	3	5	5	10	8	8	6
Q5XIF9	1	1	56.78	0.564879	1.15814	Control	Exercise	Solute carrier family 25 member 34 OS=Rattus norvegicus GN=Slc25a34 PE=2 SV=2	135510	80528	75771.4	46094.8	102062	67822.9	68081	222217	44868.6	121587	46041	47819.8	166930	96299.5	102811	62755.7	149398	70681.5	63026.5	41025.5	87958.6	50953.5	68653	182279	37294.5	104902	39407.5	52288.6	166930	114829	105298	61069.8	0	0	0	0	0	0	0	1	0
P11517	9	3	738.4	0.568242	1.30414	Exercise	Control	Hemoglobin subunit beta-2 OS=Rattus norvegicus PE=1 SV=2	2.54937e+07	2.40547e+07	1.44125e+07	2.27921e+07	2.03776e+07	1.69212e+07	9.82056e+06	4.42183e+06	2.35812e+07	2.14844e+07	2.64487e+07	2.84439e+07	3.20574e+07	4.55231e+06	7.26224e+06	3.65251e+07	2.81063e+07	2.11134e+07	1.19883e+07	2.02855e+07	1.75616e+07	1.27124e+07	9.90307e+06	3.6271e+06	1.96006e+07	1.85362e+07	2.2638e+07	3.11019e+07	3.20574e+07	5.42825e+06	7.4379e+06	3.55439e+07	2	3	2	2	2	2	1	1	1
F1LS40	2	2	106.18	0.569668	1.41791	Exercise	Control	Collagen alpha-2(I) chain OS=Rattus norvegicus GN=Col1a2 PE=4 SV=1	113682	145426	309878	119224	64872.8	118894	197935	130740	178218	39038.7	267442	308978	249238	57173.3	163867	438467	125333	127644	257756	106112	55908.1	89322	199598	107242	148134	33681.5	228910	337852	249238	68174.3	167830	426689	0	1	1	1	0	1	1	0	1
D3ZB55	1	1	59.12	0.570696	1.13407	Control	Exercise	Protein RGD1565095 OS=Rattus norvegicus GN=Coa5 PE=4 SV=1	532030	497554	362250	277013	467760	353445	263329	140730	353234	584439	294690	398708	205384	306556	237288	171671	586553	436715	301319	246548	403121	265534	265541	115437	293606	504239	252231	435967	205384	365542	243027	167059	1	1	0	0	0	0	0	0	1
Q5XIJ3	7	6	564.35	0.571997	1.03069	Control	Exercise	Isocitrate dehydrogenase 3 (NAD), gamma OS=Rattus norvegicus GN=Idh3g PE=2 SV=1	3.41273e+07	3.33886e+07	2.73683e+07	2.54951e+07	2.62682e+07	2.79173e+07	3.07467e+07	2.79137e+07	2.62874e+07	2.74768e+07	2.75899e+07	2.63698e+07	2.96838e+07	3.36081e+07	2.60176e+07	2.92471e+07	3.76248e+07	2.9306e+07	2.27648e+07	2.26912e+07	2.26382e+07	2.09735e+07	3.1005e+07	2.28968e+07	2.185e+07	2.37062e+07	2.36148e+07	2.8834e+07	2.96838e+07	4.00748e+07	2.66469e+07	2.84615e+07	5	5	5	5	4	6	4	6	5
Q3B8R7	3	2	113.02	0.572268	1.04717	Control	Exercise	Mitochondrial ribosomal protein L47 OS=Rattus norvegicus GN=Mrpl47 PE=2 SV=1	420029	376211	387700	404356	379359	533247	414779	567663	336934	381189	499935	308330	384530	524939	409981	480586	463074	330210	322488	359886	326936	400614	418264	465638	280057	328880	427905	337143	384530	625946	419898	467675	1	1	0	0	0	0	0	1	0
Q4QQV3;D3ZQY1	3	3	231.35	0.573267	1.05549	Exercise	Control	Protein FAM162A OS=Rattus norvegicus GN=Fam162a PE=2 SV=1	7.17152e+06	7.96513e+06	7.05818e+06	7.15235e+06	8.42598e+06	8.03556e+06	8.61309e+06	8.11701e+06	7.25246e+06	1.11091e+07	8.97271e+06	7.2278e+06	6.80238e+06	8.79441e+06	9.36406e+06	6.48614e+06	7.90647e+06	6.99119e+06	5.87097e+06	6.36576e+06	7.26161e+06	6.0369e+06	8.68546e+06	6.65816e+06	6.0282e+06	9.58464e+06	7.67994e+06	7.90324e+06	6.80238e+06	1.04866e+07	9.59056e+06	6.3119e+06	4	3	3	1	2	1	3	2	2
P04785	6	6	327.99	0.573686	1.03426	Exercise	Control	Protein disulfide-isomerase OS=Rattus norvegicus GN=P4hb PE=1 SV=2	1.61604e+06	1.93988e+06	1.97405e+06	2.64229e+06	2.17701e+06	1.62779e+06	2.72519e+06	1.05667e+06	1.84116e+06	2.00214e+06	2.49149e+06	2.13684e+06	1.84513e+06	2.24885e+06	1.89888e+06	1.83441e+06	1.78166e+06	1.70269e+06	1.64201e+06	2.3517e+06	1.87618e+06	1.22291e+06	2.74809e+06	866754	1.53036e+06	1.72739e+06	2.13252e+06	2.33652e+06	1.84513e+06	2.68156e+06	1.94481e+06	1.78513e+06	2	3	1	3	1	2	3	3	2
G3V628	4	4	228.53	0.574297	1.0627	Exercise	Control	Protein RGD1302996 OS=Rattus norvegicus GN=RGD1302996 PE=4 SV=1	1.00808e+06	899833	1.3457e+06	1.09707e+06	1.34795e+06	2.16622e+06	1.82929e+06	2.29719e+06	975583	1.63115e+06	1.23156e+06	1.38293e+06	1.71752e+06	1.83505e+06	2.16305e+06	1.80633e+06	1.11139e+06	789806	1.11935e+06	976419	1.16168e+06	1.62743e+06	1.84466e+06	1.88432e+06	810899	1.40731e+06	1.05412e+06	1.51217e+06	1.71752e+06	2.18814e+06	2.21537e+06	1.7578e+06	1	2	2	2	1	2	1	2	2
P12346;F1LMP2	12	12	616.24	0.575744	1.06191	Control	Exercise	Serotransferrin OS=Rattus norvegicus GN=Tf PE=1 SV=3	4.96395e+06	4.96244e+06	4.42291e+06	5.26617e+06	6.36703e+06	3.6867e+06	6.59293e+06	3.8687e+06	5.55526e+06	3.84389e+06	4.85926e+06	6.26235e+06	3.58554e+06	5.59537e+06	3.63064e+06	4.45898e+06	5.47266e+06	4.35566e+06	3.67897e+06	4.68702e+06	5.48718e+06	2.76972e+06	6.64832e+06	3.17338e+06	4.6175e+06	3.31641e+06	4.15915e+06	6.84756e+06	3.58554e+06	6.67201e+06	3.71846e+06	4.33919e+06	3	3	2	2	6	2	6	1	2
F1LP69	1	1	34.08	0.577036	1.1799	Control	Exercise	Murinoglobulin-1 OS=Rattus norvegicus GN=Mug1 PE=4 SV=1	80212.9	47506.8	62177.1	85644.8	56583.9	43964.5	147122	28637.3	69205.1	40002.4	60248.5	80011	24763.6	81262.8	34681.7	77531.6	88433.3	41697.9	51718.8	76225.9	48764.6	33029.3	148358	23490.4	57522.8	34513	51568	87488	24763.6	96899	35520.6	75448.8	1	0	0	0	0	0	0	0	0
O88989	9	9	521.26	0.577206	1.19177	Control	Exercise	Malate dehydrogenase, cytoplasmic OS=Rattus norvegicus GN=Mdh1 PE=1 SV=3	7.66302e+06	6.27162e+06	6.20477e+06	5.97887e+06	6.42562e+06	2.13625e+06	5.25644e+06	2.24841e+06	5.63346e+06	3.07054e+06	3.66148e+06	6.42486e+06	3.7783e+06	4.31457e+06	3.69638e+06	4.81722e+06	8.44834e+06	5.50476e+06	5.16111e+06	5.32134e+06	5.53767e+06	1.60491e+06	5.3006e+06	1.8443e+06	4.6825e+06	2.64918e+06	3.13394e+06	7.02526e+06	3.7783e+06	5.14476e+06	3.78579e+06	4.68781e+06	5	3	8	3	5	0	2	1	3
P23965	11	1	821.04	0.577393	1.18155	Control	Exercise	Enoyl-CoA delta isomerase 1, mitochondrial OS=Rattus norvegicus GN=Eci1 PE=1 SV=1	739591	285112	748336	608302	224285	1.35897e+06	238013	1.02136e+06	707371	1.10275e+06	280871	189967	903073	108001	496668	632606	815386	250250	622464	541403	193291	1.02096e+06	240013	837796	587963	951422	240403	207719	903073	128783	508682	615611	0	0	0	0	0	0	0	1	0
F1LS18;D3ZNZ9;F1LP73	4	4	219.45	0.578295	1.24478	Control	Exercise	Histone H2B OS=Rattus norvegicus GN=Hist1h2bl PE=3 SV=1	1.65222e+06	2.21002e+06	2.37803e+06	3.76079e+06	7.99371e+06	4.04795e+06	1.28079e+06	1.60101e+06	5.29348e+06	2.91379e+06	2.30223e+06	1.90626e+06	1.53916e+06	1.08043e+06	1.58537e+06	3.40253e+06	1.82155e+06	1.93979e+06	1.97804e+06	3.34719e+06	6.88908e+06	3.04111e+06	1.29155e+06	1.31327e+06	4.39991e+06	2.51394e+06	1.97053e+06	2.0844e+06	1.53916e+06	1.28832e+06	1.62371e+06	3.31112e+06	1	1	3	2	1	1	1	1	2
Q7HKW3	7	7	378.58	0.58087	1.05773	Control	Exercise	NADH-ubiquinone oxidoreductase chain 4 (Fragment) OS=Rattus norvegicus GN=Mt-nd4 PE=2 SV=1	3.5847e+07	2.67304e+07	2.8125e+07	1.93593e+07	3.35609e+07	2.98508e+07	3.46316e+07	2.63301e+07	3.57011e+07	2.59903e+07	2.55071e+07	2.42813e+07	2.45658e+07	3.0755e+07	3.21599e+07	2.26788e+07	3.95207e+07	2.34619e+07	2.33943e+07	1.72302e+07	2.89232e+07	2.24261e+07	3.49225e+07	2.15978e+07	2.96745e+07	2.24237e+07	2.18321e+07	2.65504e+07	2.45658e+07	3.66727e+07	3.29378e+07	2.20695e+07	4	2	3	2	2	2	3	2	5
D3ZUX7	11	11	536.86	0.581643	1.05332	Control	Exercise	Protein Acsf3 OS=Rattus norvegicus GN=Acsf3 PE=4 SV=1	5.40453e+06	3.57142e+06	2.87526e+06	3.76032e+06	3.79021e+06	3.38935e+06	3.41798e+06	3.74909e+06	2.58047e+06	2.99816e+06	3.4127e+06	4.02702e+06	4.08103e+06	3.80554e+06	3.96592e+06	3.57071e+06	5.95839e+06	3.13473e+06	2.39164e+06	3.34677e+06	3.26645e+06	2.54633e+06	3.4467e+06	3.07527e+06	2.14487e+06	2.58673e+06	2.921e+06	4.40334e+06	4.08103e+06	4.53779e+06	4.06185e+06	3.47479e+06	4	2	2	1	3	2	3	3	1
P00564	11	11	987.42	0.584764	1.27355	Control	Exercise	Creatine kinase M-type OS=Rattus norvegicus GN=Ckm PE=1 SV=2	1.65552e+08	1.53424e+08	1.67188e+08	1.36341e+08	1.78945e+08	3.51831e+07	1.06958e+08	3.16301e+07	1.71954e+08	4.24955e+07	5.8998e+07	1.4222e+08	8.22337e+07	8.50296e+07	6.01091e+07	1.22707e+08	1.82518e+08	1.34664e+08	1.39066e+08	1.21346e+08	1.54216e+08	2.64322e+07	1.07856e+08	2.59453e+07	1.42927e+08	3.6664e+07	5.04976e+07	1.5551e+08	8.22337e+07	1.01391e+08	6.15631e+07	1.1941e+08	16	15	16	16	17	7	14	7	15
Q68FS4;F1M9Z6	8	8	556.84	0.585824	1.04694	Exercise	Control	Cytosol aminopeptidase OS=Rattus norvegicus GN=Lap3 PE=1 SV=1	3.7504e+06	3.09784e+06	3.33799e+06	3.05378e+06	3.06465e+06	2.95395e+06	3.78992e+06	4.30123e+06	3.16682e+06	4.80683e+06	3.62277e+06	2.80233e+06	3.44434e+06	3.76389e+06	3.13745e+06	3.88911e+06	4.13475e+06	2.71905e+06	2.77653e+06	2.71794e+06	2.64115e+06	2.21923e+06	3.82176e+06	3.52818e+06	2.63224e+06	4.1472e+06	3.10081e+06	3.0642e+06	3.44434e+06	4.48812e+06	3.21334e+06	3.78464e+06	4	3	5	3	5	3	3	4	4
Q6AXV4	18	18	1304.03	0.588091	1.02835	Exercise	Control	Sorting and assembly machinery component 50 homolog OS=Rattus norvegicus GN=Samm50 PE=1 SV=1	5.24365e+07	4.8438e+07	4.18014e+07	4.00162e+07	4.37036e+07	5.67082e+07	4.32642e+07	4.68581e+07	4.30591e+07	5.67853e+07	4.43529e+07	4.64328e+07	4.8459e+07	4.76941e+07	5.31396e+07	4.3883e+07	5.78103e+07	4.25152e+07	3.47703e+07	3.56154e+07	3.76642e+07	4.26034e+07	4.36277e+07	3.84364e+07	3.57905e+07	4.89929e+07	3.79626e+07	5.07719e+07	4.8459e+07	5.68712e+07	5.4425e+07	4.27042e+07	16	13	13	16	14	14	15	16	16
P80431	2	2	79.44	0.588758	1.05009	Exercise	Control	Cytochrome c oxidase subunit 7B, mitochondrial OS=Rattus norvegicus GN=Cox7b PE=1 SV=3	4.6289e+06	5.50146e+06	4.19421e+06	5.65497e+06	5.66222e+06	8.0138e+06	5.14274e+06	7.16881e+06	3.93157e+06	6.69133e+06	6.15628e+06	5.42508e+06	7.15553e+06	6.1758e+06	6.57842e+06	6.15549e+06	5.10328e+06	4.82877e+06	3.48873e+06	5.03305e+06	4.87977e+06	6.02056e+06	5.18595e+06	5.88038e+06	3.2679e+06	5.77311e+06	5.26929e+06	5.93206e+06	7.15553e+06	7.36412e+06	6.73754e+06	5.99013e+06	1	1	1	0	0	1	2	1	1
G3V7L0	1	1	127.46	0.591128	1.02585	Exercise	Control	Adrenodoxin, mitochondrial OS=Rattus norvegicus GN=Fdx1 PE=4 SV=1	1.49668e+06	1.32659e+06	1.40162e+06	1.2013e+06	1.80084e+06	1.36361e+06	1.56005e+06	1.31329e+06	1.34455e+06	1.58717e+06	1.46399e+06	1.30295e+06	1.54688e+06	1.64514e+06	1.51173e+06	1.35789e+06	1.65007e+06	1.16438e+06	1.16586e+06	1.06918e+06	1.55199e+06	1.02445e+06	1.57316e+06	1.07725e+06	1.11758e+06	1.36937e+06	1.25306e+06	1.42471e+06	1.54688e+06	1.96169e+06	1.5483e+06	1.32142e+06	1	2	1	2	2	1	2	0	2
G3V8W9	1	1	37.37	0.591593	1.22097	Exercise	Control	Protein LOC500420 OS=Rattus norvegicus GN=LOC500420 PE=4 SV=1	57268.7	79890.9	54201.2	54200.4	44329.9	60263.8	75393.1	40806	88875.2	101387	96446.5	84216.8	19478	55468.6	77967.7	45565.7	63137.7	70122.2	45084.4	48239.6	38204	45274.6	76026.6	33472	73872.5	87473.7	82550.6	92086.8	19478	66141.7	79853.6	44341.7	0	0	0	0	0	1	0	0	0
Q03346	9	8	565.33	0.591737	1.03491	Exercise	Control	Mitochondrial-processing peptidase subunit beta OS=Rattus norvegicus GN=Pmpcb PE=1 SV=3	8.86943e+06	8.51105e+06	8.28102e+06	7.90563e+06	9.08252e+06	8.49228e+06	8.60774e+06	8.7393e+06	9.05681e+06	1.14255e+07	7.80422e+06	7.53129e+06	9.04267e+06	9.3305e+06	8.80758e+06	7.88154e+06	9.77838e+06	7.47036e+06	6.88813e+06	7.0362e+06	7.82742e+06	6.38002e+06	8.68006e+06	7.1686e+06	7.52797e+06	9.85761e+06	6.6798e+06	8.23509e+06	9.04267e+06	1.11258e+07	9.02062e+06	7.66981e+06	6	3	4	3	4	4	4	4	3
D3ZMR1	1	1	34.96	0.592314	1.06408	Exercise	Control	Protein Tomm7 OS=Rattus norvegicus GN=Tomm7 PE=4 SV=1	109780	111723	85467.4	64262.4	74476.5	114523	91558.9	128115	99376.2	91179.3	130077	105407	99428.3	131970	109129	63312.5	121030	98062.5	71091.5	57195	64184.7	86038.2	92328.2	105089	82600.8	78667.1	111335	115258	99428.3	157363	111769	61611.7	0	0	0	0	1	0	0	0	0
P19234	12	12	1003.29	0.593855	1.02176	Exercise	Control	NADH dehydrogenase [ubiquinone] flavoprotein 2, mitochondrial OS=Rattus norvegicus GN=Ndufv2 PE=1 SV=2	1.94452e+08	1.7966e+08	1.78231e+08	1.73271e+08	1.75926e+08	2.16017e+08	1.7498e+08	2.15713e+08	1.94786e+08	2.13389e+08	1.88586e+08	1.68242e+08	1.8591e+08	2.0117e+08	2.05353e+08	1.83634e+08	2.1438e+08	1.57692e+08	1.48252e+08	1.54215e+08	1.51615e+08	1.62288e+08	1.7645e+08	1.76943e+08	1.61905e+08	1.84107e+08	1.61415e+08	1.83964e+08	1.8591e+08	2.39879e+08	2.1032e+08	1.78701e+08	20	20	19	17	18	20	15	20	17
D4A3V2	6	6	424.45	0.595511	1.02577	Control	Exercise	NADH dehydrogenase [ubiquinone] 1 alpha subcomplex subunit 6 OS=Rattus norvegicus GN=Ndufa6 PE=3 SV=1	4.96858e+07	4.46987e+07	3.91865e+07	4.36664e+07	4.43308e+07	4.69297e+07	3.84876e+07	4.76605e+07	4.61095e+07	4.91568e+07	4.08232e+07	3.75229e+07	3.65615e+07	4.42927e+07	4.69948e+07	4.42747e+07	5.47777e+07	3.92332e+07	3.25953e+07	3.88641e+07	3.82048e+07	3.5257e+07	3.8811e+07	3.90946e+07	3.83259e+07	4.24112e+07	3.49415e+07	4.10294e+07	3.65615e+07	5.28152e+07	4.81315e+07	4.30853e+07	6	5	5	5	5	4	7	5	5
Q09073;D3ZE29;D4A481;F1LZS8	18	5	1263.81	0.595739	1.02952	Control	Exercise	ADP/ATP translocase 2 OS=Rattus norvegicus GN=Slc25a5 PE=1 SV=3	1.14881e+07	1.04395e+07	1.02165e+07	1.09481e+07	9.55693e+06	1.28536e+07	1.22967e+07	1.2674e+07	1.18732e+07	1.21187e+07	1.19245e+07	9.41065e+06	1.10463e+07	1.1347e+07	1.05812e+07	9.57775e+06	1.26654e+07	9.16299e+06	8.49809e+06	9.74403e+06	8.23627e+06	9.65659e+06	1.24e+07	1.03962e+07	9.86895e+06	1.04557e+07	1.02064e+07	1.02901e+07	1.10463e+07	1.35304e+07	1.08372e+07	9.32046e+06	4	3	3	2	4	3	4	5	4
D3ZFQ8	12	12	1271.43	0.59592	1.042	Exercise	Control	Cytochrome c-1 (Predicted), isoform CRA_c OS=Rattus norvegicus GN=Cyc1 PE=4 SV=1	4.24778e+08	4.46645e+08	4.26239e+08	2.61432e+08	4.46789e+08	4.44165e+08	3.90582e+08	3.41076e+08	3.87889e+08	5.26576e+08	3.29352e+08	3.93829e+08	4.10137e+08	4.50584e+08	4.55842e+08	3.61136e+08	4.6831e+08	3.92032e+08	3.54545e+08	2.32681e+08	3.85048e+08	3.33689e+08	3.93863e+08	2.79775e+08	3.22411e+08	4.54316e+08	2.819e+08	4.30633e+08	4.10137e+08	5.37283e+08	4.66868e+08	3.51434e+08	24	21	20	17	18	22	24	23	18
B2RZ31	2	2	177.35	0.596984	1.06072	Exercise	Control	Protein Sirt3 OS=Rattus norvegicus GN=Sirt3 PE=2 SV=1	1.11633e+06	1.11575e+06	1.13186e+06	687189	879948	839303	879746	883264	1.38134e+06	1.25856e+06	997798	836032	893481	986915	726425	910284	1.23073e+06	979324	941481	611614	758349	630546	887138	724517	1.14816e+06	1.08585e+06	854036	914158	893481	1.17681e+06	743996	885830	2	2	1	1	0	0	3	2	1
D3ZDQ9;D4ABY5	5	5	252.97	0.597519	1.04218	Exercise	Control	Protein Sgca OS=Rattus norvegicus GN=Sgca PE=4 SV=1	1.79114e+06	1.43896e+06	1.74867e+06	1.69648e+06	1.92088e+06	1.69654e+06	2.37504e+06	1.66061e+06	2.38297e+06	1.4198e+06	1.69985e+06	1.73222e+06	1.73564e+06	2.035e+06	2.00818e+06	1.91901e+06	1.97469e+06	1.26301e+06	1.45454e+06	1.50991e+06	1.65543e+06	1.27457e+06	2.39499e+06	1.36215e+06	1.98071e+06	1.22496e+06	1.45494e+06	1.8941e+06	1.73564e+06	2.42657e+06	2.05675e+06	1.86746e+06	1	0	2	0	1	1	2	2	3
F1LPV8	5	5	331.29	0.601016	1.07567	Control	Exercise	Protein Suclg2 (Fragment) OS=Rattus norvegicus GN=Suclg2 PE=4 SV=1	3.29782e+06	4.33037e+06	2.54053e+06	2.21182e+06	2.69156e+06	3.93636e+06	4.44458e+06	4.28905e+06	2.18355e+06	3.61727e+06	2.72301e+06	2.65051e+06	4.44124e+06	4.51122e+06	2.61015e+06	3.05355e+06	3.63579e+06	3.80087e+06	2.11321e+06	1.96857e+06	2.31962e+06	2.95728e+06	4.48192e+06	3.51819e+06	1.81495e+06	3.12089e+06	2.33068e+06	2.8982e+06	4.44124e+06	5.37925e+06	2.67328e+06	2.97152e+06	4	4	3	2	2	3	4	4	2
G3V6E5;P97707	2	2	103.02	0.601236	1.07367	Exercise	Control	Calcium channel, voltage-dependent, gamma subunit 1 OS=Rattus norvegicus GN=Cacng1 PE=4 SV=1	622079	631183	772199	660259	1.55969e+06	872359	839489	837624	948839	943335	1.05522e+06	816530	973245	1.13248e+06	430294	995510	685831	554005	642313	587646	1.34416e+06	655381	846543	687080	788669	813885	903185	892835	973245	1.35038e+06	440702	968766	0	0	1	0	1	1	1	0	1
P70584	10	10	491.27	0.603489	1.04051	Control	Exercise	Short/branched chain specific acyl-CoA dehydrogenase, mitochondrial OS=Rattus norvegicus GN=Acadsb PE=1 SV=1	9.13619e+06	1.02613e+07	8.51299e+06	7.31788e+06	6.55096e+06	9.73974e+06	9.11395e+06	9.35316e+06	8.72726e+06	1.07178e+07	6.93396e+06	7.11136e+06	8.53264e+06	9.01516e+06	8.75937e+06	7.46393e+06	1.00725e+07	9.0066e+06	7.08108e+06	6.51308e+06	5.6457e+06	7.31721e+06	9.19052e+06	7.67213e+06	7.25404e+06	9.24701e+06	5.93493e+06	7.77591e+06	8.53264e+06	1.07498e+07	8.97124e+06	7.26342e+06	4	4	4	4	4	5	6	5	4
F1M9A4	1	1	41.04	0.604904	1.06028	Exercise	Control	Protein Mrpl1 OS=Rattus norvegicus GN=Mrpl1 PE=4 SV=1	576100	714884	686069	514979	296835	578232	432443	568828	699208	602834	653226	407251	580140	679395	382426	627226	635140	627471	570670	458343	255816	434411	436077	466594	581177	520110	559110	445308	580140	810121	391676	610376	1	0	1	0	0	0	0	0	0
P62260	1	1	44.11	0.607268	1.25786	Control	Exercise	14-3-3 protein epsilon OS=Rattus norvegicus GN=Ywhae PE=1 SV=1	458508	446769	477559	502035	542074	96201.6	467665	106978	596171	171465	189477	415257	296349	333846	133809	326373	505497	392140	397233	446823	467166	72273.7	471595	87751.2	495533	147936	162178	454062	296349	398083	137046	317605	1	0	0	0	0	0	0	0	0
D4A414	4	4	238.81	0.607356	1.02704	Control	Exercise	COX15 homolog, cytochrome c oxidase assembly protein (Yeast), isoform CRA_a OS=Rattus norvegicus GN=Cox15 PE=3 SV=1	3.18832e+06	3.0961e+06	2.58593e+06	2.93849e+06	3.48796e+06	2.9676e+06	2.90207e+06	3.22773e+06	2.56701e+06	3.24668e+06	2.57293e+06	3.00674e+06	2.72355e+06	3.65624e+06	3.85672e+06	2.12207e+06	3.51507e+06	2.71752e+06	2.15097e+06	2.61532e+06	3.00597e+06	2.22948e+06	2.92645e+06	2.64762e+06	2.13368e+06	2.80115e+06	2.20223e+06	3.28772e+06	2.72355e+06	4.35975e+06	3.95001e+06	2.06506e+06	1	1	0	1	1	1	1	1	1
D3ZTR5	2	2	116.63	0.608474	1.07069	Control	Exercise	Protein Scand3 OS=Rattus norvegicus GN=Zbed5 PE=4 SV=1	2.62518e+06	4.16803e+06	2.80157e+06	3.81897e+06	2.22542e+06	3.60517e+06	2.78369e+06	4.39698e+06	3.13016e+06	4.21759e+06	2.54193e+06	3.03813e+06	2.57712e+06	2.86346e+06	3.56629e+06	2.74567e+06	2.89422e+06	3.65838e+06	2.33034e+06	3.39897e+06	1.9179e+06	2.70847e+06	2.80708e+06	3.60672e+06	2.60177e+06	3.63882e+06	2.17569e+06	3.32204e+06	2.57712e+06	3.41443e+06	3.65255e+06	2.67191e+06	2	2	2	2	2	2	2	2	2
D4A9W3	5	4	339.79	0.612461	1.05494	Exercise	Control	Protein RGD1311756 OS=Rattus norvegicus GN=RGD1311756 PE=4 SV=1	1.97727e+06	1.7608e+06	1.39637e+06	1.75372e+06	2.62274e+06	2.84257e+06	2.84855e+06	3.11525e+06	1.88717e+06	3.00229e+06	2.98388e+06	1.66381e+06	2.2301e+06	2.73396e+06	2.79464e+06	2.02775e+06	2.1799e+06	1.5455e+06	1.1615e+06	1.56085e+06	2.26031e+06	2.13555e+06	2.87248e+06	2.55535e+06	1.5686e+06	2.59029e+06	2.55397e+06	1.81929e+06	2.2301e+06	3.26002e+06	2.86224e+06	1.97328e+06	2	4	2	3	2	2	2	2	3
F1M7X5	1	1	46.06	0.616766	1.16629	Exercise	Control	Dipeptidyl peptidase 4 OS=Rattus norvegicus GN=Dpp4 PE=4 SV=1	43329.3	34730.3	32695.3	33499.7	41272.6	38477.8	42114.6	28035.3	34343.9	52859.3	83588.5	36501.5	45735.7	40746.6	30058.4	19235	47769.8	30483.6	27195.8	29815.5	35569.2	28907.3	42468.5	22996.6	28546.5	45605.6	71545.2	39912.6	45735.7	48586.9	30785.4	18718.3	0	0	0	0	0	1	0	0	0
P09650	9	8	576.28	0.621452	1.03339	Control	Exercise	Mast cell protease 1 OS=Rattus norvegicus GN=Mcpt1 PE=1 SV=3	3.57814e+07	3.68551e+07	5.08941e+07	3.50703e+07	4.36382e+07	3.50305e+07	4.01946e+07	3.57246e+07	3.66183e+07	4.14046e+07	5.48527e+07	4.04464e+07	3.69417e+07	2.50179e+07	3.1674e+07	3.61137e+07	3.94483e+07	3.23486e+07	4.23336e+07	3.12134e+07	3.76079e+07	2.63175e+07	4.05324e+07	2.93039e+07	3.04369e+07	3.57228e+07	4.69496e+07	4.42261e+07	3.69417e+07	2.98317e+07	3.24401e+07	3.51436e+07	6	3	5	7	6	5	5	5	6
Q75Q41	3	3	239.38	0.621828	1.03792	Exercise	Control	Mitochondrial import receptor subunit TOM22 homolog OS=Rattus norvegicus GN=Tomm22 PE=1 SV=1	6.22372e+06	6.29157e+06	5.43148e+06	5.59997e+06	6.39819e+06	8.0758e+06	5.53023e+06	6.4399e+06	6.52349e+06	8.84247e+06	6.43646e+06	5.99524e+06	5.77675e+06	6.50198e+06	6.43903e+06	5.37102e+06	6.86153e+06	5.52227e+06	4.51789e+06	4.9841e+06	5.51403e+06	6.06714e+06	5.5767e+06	5.28247e+06	5.42228e+06	7.62905e+06	5.5091e+06	6.5555e+06	5.77675e+06	7.75307e+06	6.59478e+06	5.22674e+06	3	3	2	3	3	3	3	3	3
D3ZUX5	9	9	454.99	0.622704	1.04325	Exercise	Control	Coiled-coil-helix-coiled-coil-helix domain containing 3 (Predicted), isoform CRA_a OS=Rattus norvegicus GN=Chchd3 PE=4 SV=1	1.87041e+07	2.11691e+07	1.84665e+07	1.72127e+07	1.73019e+07	2.35307e+07	1.91349e+07	2.35745e+07	1.6553e+07	2.8231e+07	2.20187e+07	1.93075e+07	1.88947e+07	2.11403e+07	2.21263e+07	1.7704e+07	2.06209e+07	1.85807e+07	1.53604e+07	1.53197e+07	1.4911e+07	1.7678e+07	1.92957e+07	1.93375e+07	1.37588e+07	2.43569e+07	1.88463e+07	2.11117e+07	1.88947e+07	2.5208e+07	2.26615e+07	1.72284e+07	3	3	6	4	3	7	1	7	4
D3ZYW7	2	2	70.8	0.623163	1.07287	Exercise	Control	Frataxin, mitochondrial OS=Rattus norvegicus GN=Fxn PE=1 SV=1	2.24408e+06	1.47852e+06	1.80791e+06	818079	1.99655e+06	1.82887e+06	2.34718e+06	1.28956e+06	2.71209e+06	1.80488e+06	1.12593e+06	1.87095e+06	1.92438e+06	2.48661e+06	1.46637e+06	1.42596e+06	2.47406e+06	1.29774e+06	1.50382e+06	728110	1.72065e+06	1.37398e+06	2.36691e+06	1.05779e+06	2.25427e+06	1.55721e+06	963707	2.04579e+06	1.92438e+06	2.96507e+06	1.50184e+06	1.38766e+06	0	0	2	1	0	0	0	0	0
P14659;D4A4S3;F1LLW5;F1LM52;F1LZI1;F1M2Y7;P55063	4	2	284.44	0.625534	1.10907	Control	Exercise	Heat shock-related 70 kDa protein 2 OS=Rattus norvegicus GN=Hspa2 PE=2 SV=2	443888	497821	521465	355430	438159	263755	372086	170584	461222	219459	331559	365438	335238	318675	246619	483739	489378	436950	433754	316341	377611	198152	375213	139926	383365	189344	283788	399589	335238	379993	252584	470744	1	1	1	0	1	0	0	1	1
A2IBE0	1	1	64.76	0.627884	1.0347	Control	Exercise	Membrane-bound carbonic anhydrase 14 OS=Rattus norvegicus GN=Car14 PE=2 SV=1	229728	199433	174067	179568	181548	211272	176257	264244	291044	172116	146807	223221	169738	215118	194026	149847	253271	175048	144788	159820	156460	158723	177738	216752	241914	148497	125656	244081	169738	256510	198719	145822	1	1	1	1	0	1	0	0	1
D3ZYG6;F1LM00	5	5	274.18	0.631172	1.03997	Exercise	Control	Protein Rtn2 OS=Rattus norvegicus GN=Rtn2 PE=4 SV=1	6.14727e+06	6.6227e+06	6.69462e+06	8.04221e+06	5.84242e+06	6.61638e+06	7.6729e+06	3.80489e+06	7.74972e+06	5.90638e+06	7.50787e+06	7.73728e+06	6.45623e+06	7.08166e+06	4.82016e+06	6.24017e+06	6.77725e+06	5.81291e+06	5.56857e+06	7.15776e+06	5.03506e+06	4.97071e+06	7.73737e+06	3.12104e+06	6.44152e+06	5.09587e+06	6.42615e+06	8.46033e+06	6.45623e+06	8.44428e+06	4.93675e+06	6.07254e+06	3	3	2	2	2	3	1	1	3
P14882	23	6	1384.08	0.633453	1.02664	Exercise	Control	Propionyl-CoA carboxylase alpha chain, mitochondrial OS=Rattus norvegicus GN=Pcca PE=1 SV=3	1.5375e+07	1.43784e+07	1.30388e+07	1.35488e+07	1.09432e+07	1.61421e+07	1.51084e+07	1.80578e+07	1.21097e+07	1.69683e+07	1.55748e+07	1.36503e+07	1.53582e+07	1.53968e+07	1.57745e+07	1.48666e+07	1.69507e+07	1.26203e+07	1.08457e+07	1.20587e+07	9.43101e+06	1.21272e+07	1.52353e+07	1.48123e+07	1.00655e+07	1.46398e+07	1.33308e+07	1.49259e+07	1.53582e+07	1.83594e+07	1.6156e+07	1.44672e+07	2	3	3	3	3	3	3	3	3
D3ZWR5;Q8K3G3	5	5	260.03	0.634597	1.01613	Exercise	Control	Four and a half LIM domains 1, isoform CRA_c OS=Rattus norvegicus GN=Fhl1 PE=4 SV=1	2.97935e+06	215637	1.9523e+06	2.38663e+06	2.19395e+06	123839	1.48026e+06	274049	2.45571e+06	357201	619441	3.81837e+06	1.25459e+06	988119	591785	1.70801e+06	3.28468e+06	189270	1.62392e+06	2.12416e+06	1.89077e+06	93037.1	1.49269e+06	224795	2.04117e+06	308183	530193	4.1752e+06	1.25459e+06	1.17825e+06	606099	1.66213e+06	2	0	4	2	4	0	2	0	3
Q920A6	1	1	44.72	0.636226	1.04261	Control	Exercise	Retinoid-inducible serine carboxypeptidase OS=Rattus norvegicus GN=Scpep1 PE=2 SV=1	274839	302686	248389	182479	288152	207126	309493	157006	314401	412468	269001	157503	203590	222104	140926	169656	303005	265675	206610	162411	248333	155608	312093	128788	261328	355867	230244	172222	203590	264840	144335	165098	1	0	0	0	0	0	0	0	0
P62804;F1M449	7	7	510.67	0.636312	1.2494	Control	Exercise	Histone H4 OS=Rattus norvegicus GN=Hist1h4b PE=1 SV=2	8.28407e+06	1.20115e+07	1.65378e+07	2.23369e+07	5.92337e+07	3.67187e+07	8.71205e+06	8.67991e+06	4.40712e+07	9.73999e+06	1.623e+07	1.09523e+07	1.14473e+07	6.91997e+06	8.88599e+06	2.98314e+07	9.13304e+06	1.05428e+07	1.37561e+07	1.98804e+07	5.10483e+07	2.75858e+07	8.78525e+06	7.11989e+06	3.66317e+07	8.40341e+06	1.38916e+07	1.19758e+07	1.14473e+07	8.25148e+06	9.10093e+06	2.903e+07	6	5	7	5	9	8	6	5	7
Q9QXQ0	19	2	1654.63	0.636805	1.22998	Control	Exercise	Alpha-actinin-4 OS=Rattus norvegicus GN=Actn4 PE=1 SV=2	6.16853e+06	6.79383e+06	8.53778e+06	8.71589e+06	1.41842e+06	2.37705e+06	8.07584e+06	4.16895e+06	8.05337e+06	1.56267e+06	4.98439e+06	5.56067e+06	5.35066e+06	3.85204e+06	5.21964e+06	3.02376e+06	6.80069e+06	5.96311e+06	7.1017e+06	7.75735e+06	1.22241e+06	1.78582e+06	8.14369e+06	3.41967e+06	6.69391e+06	1.34823e+06	4.26624e+06	6.08031e+06	5.35066e+06	4.59323e+06	5.34589e+06	2.94253e+06	0	0	0	0	2	0	0	0	0
Q6P2A5;P29411	4	4	243.65	0.6375	1.03032	Control	Exercise	Adenylate kinase 3 OS=Rattus norvegicus GN=Ak3 PE=2 SV=1	5.24269e+06	7.1337e+06	6.23291e+06	5.71855e+06	5.70941e+06	6.60224e+06	5.29216e+06	4.95192e+06	5.17855e+06	6.84348e+06	5.95666e+06	5.83556e+06	5.51071e+06	6.04645e+06	4.76775e+06	5.3647e+06	5.77997e+06	6.26143e+06	5.18452e+06	5.08965e+06	4.92044e+06	4.96009e+06	5.33662e+06	4.06192e+06	4.30438e+06	5.90438e+06	5.09844e+06	6.38089e+06	5.51071e+06	7.20988e+06	4.88308e+06	5.22059e+06	2	3	2	2	3	2	3	3	2
Q6AYJ9	1	1	37.78	0.637928	1.04327	Control	Exercise	ADP-ribosyltransferase 3 OS=Rattus norvegicus GN=Art3 PE=2 SV=1	350402	372960	404604	403593	333911	420498	582611	322858	390573	438854	540757	318583	290838	366139	452965	260349	386312	327356	336549	359207	287768	315909	587506	264831	324642	378632	462845	348354	290838	436590	463921	253355	0	0	0	0	0	0	0	0	1
D4A6B2;D3ZDF7;D3ZSD1;Q3KR86	40	39	3117.38	0.640138	1.02834	Control	Exercise	Mitochondrial inner membrane protein OS=Rattus norvegicus GN=Immt PE=4 SV=1	2.02727e+08	2.04561e+08	1.80072e+08	1.77287e+08	1.83848e+08	2.35464e+08	1.86354e+08	2.37476e+08	1.64049e+08	2.48492e+08	1.94499e+08	1.75523e+08	1.81745e+08	2.03123e+08	2.21308e+08	1.74739e+08	2.23503e+08	1.79548e+08	1.49784e+08	1.5779e+08	1.58443e+08	1.76898e+08	1.87919e+08	1.94795e+08	1.36356e+08	2.14393e+08	1.66476e+08	1.91926e+08	1.81745e+08	2.42207e+08	2.26661e+08	1.70045e+08	34	38	26	28	31	39	29	43	30
G3V6R5	7	7	397.83	0.640771	1.06217	Control	Exercise	Sulfite oxidase OS=Rattus norvegicus GN=Suox PE=4 SV=1	5.0658e+06	6.35443e+06	4.62591e+06	4.66122e+06	3.72628e+06	5.95551e+06	7.02034e+06	7.08012e+06	4.52541e+06	5.56769e+06	4.95173e+06	5.52149e+06	4.97678e+06	5.44134e+06	5.74716e+06	5.15383e+06	5.58495e+06	5.57744e+06	3.84782e+06	4.14859e+06	3.21136e+06	4.47422e+06	7.07933e+06	5.80762e+06	3.7615e+06	4.80365e+06	4.23829e+06	6.03748e+06	4.97678e+06	6.48834e+06	5.88618e+06	5.01538e+06	2	3	1	0	1	1	4	3	2
Q5XIW0;D4ACB3	3	3	147.24	0.64112	1.05153	Exercise	Control	Mitochondrial import inner membrane translocase subunit Tim23 OS=Rattus norvegicus GN=Timm23 PE=2 SV=1	2.31886e+06	1.75559e+06	1.87182e+06	1.35324e+06	1.98985e+06	1.84494e+06	2.02721e+06	1.75036e+06	2.01393e+06	2.33865e+06	2.07627e+06	1.97311e+06	1.72977e+06	2.42475e+06	1.86684e+06	1.2569e+06	2.5565e+06	1.54093e+06	1.55697e+06	1.20442e+06	1.71487e+06	1.38605e+06	2.04424e+06	1.43577e+06	1.67397e+06	2.01773e+06	1.77713e+06	2.1575e+06	1.72977e+06	2.8913e+06	1.912e+06	1.22314e+06	2	1	1	1	2	1	1	1	0
P17764	22	22	1841.86	0.641647	1.04078	Exercise	Control	Acetyl-CoA acetyltransferase, mitochondrial OS=Rattus norvegicus GN=Acat1 PE=1 SV=1	1.70314e+08	2.20471e+08	1.90187e+08	1.51713e+08	1.23372e+08	2.16936e+08	2.65808e+08	2.91829e+08	1.41185e+08	2.20899e+08	2.30275e+08	1.90183e+08	2.20167e+08	2.10162e+08	2.83986e+08	2.00264e+08	1.87768e+08	1.93513e+08	1.58197e+08	1.35028e+08	1.06324e+08	1.62978e+08	2.68042e+08	2.39379e+08	1.17352e+08	1.90586e+08	1.97097e+08	2.07955e+08	2.20167e+08	2.50601e+08	2.90855e+08	1.94884e+08	23	27	25	20	21	23	24	24	23
F1LNQ5	1	1	40.93	0.641956	1.22739	Control	Exercise	Protein Nars2 OS=Rattus norvegicus GN=Nars2 PE=3 SV=1	62117.5	71336.9	82417.6	40610.3	204352	131383	43679.6	154898	60394.6	73629	86846.7	39725.3	126979	49077.6	104650	102987	68483.5	62614.2	68554.7	36144.1	176112	98704.2	44046.6	127058	50199.6	63525.1	74334	43437.7	126979	58520.8	107181	100220	0	0	0	0	0	0	0	0	0
Q9Z2L0;D3ZCI4;F1LU57	17	8	2092.33	0.643274	1.02678	Control	Exercise	Voltage-dependent anion-selective channel protein 1 OS=Rattus norvegicus GN=Vdac1 PE=1 SV=4	5.41878e+08	5.09619e+08	4.35761e+08	4.68968e+08	4.38804e+08	5.6891e+08	4.67234e+08	5.67319e+08	4.38837e+08	5.79701e+08	4.74121e+08	3.81674e+08	4.80879e+08	5.38674e+08	5.26863e+08	4.7347e+08	5.9741e+08	4.47306e+08	3.62464e+08	4.17393e+08	3.78166e+08	4.27407e+08	4.7116e+08	4.65356e+08	3.64758e+08	5.00151e+08	4.05811e+08	4.17342e+08	4.80879e+08	6.42324e+08	5.39607e+08	4.60751e+08	26	26	23	25	22	24	23	27	23
Q5U2X8	1	1	36.9	0.643801	1.06913	Control	Exercise	Acyl-CoA thioesterase 9 OS=Rattus norvegicus GN=Acot9 PE=2 SV=1	27869.8	41424.7	40586.4	63180.7	70129	50489.7	36884.4	81979.8	27982.5	87480.8	61973.2	55505.2	33625.8	44823.6	52711.6	21766.8	30726	36359.5	33759.6	56232.3	60438	37931.6	37194.3	67245.8	23258.9	75476.1	53044.2	60692.1	33625.8	53448.3	53986.6	21182.1	0	0	0	0	0	0	0	0	0
F1M944	3	3	139.88	0.645525	1.06092	Exercise	Control	Calsequestrin OS=Rattus norvegicus GN=Casq2 PE=3 SV=1	7.89751e+06	7.75914e+06	7.18388e+06	9.47148e+06	8.81615e+06	9.22017e+06	1.01104e+07	6.24959e+06	6.24831e+06	9.29534e+06	1.23145e+07	8.21206e+06	1.08889e+07	8.17474e+06	9.08879e+06	6.54995e+06	8.70686e+06	6.81039e+06	5.97553e+06	8.42984e+06	7.59786e+06	6.92687e+06	1.01954e+07	5.12637e+06	5.19356e+06	8.01977e+06	1.05402e+07	8.97948e+06	1.08889e+07	9.74769e+06	9.30864e+06	6.37399e+06	1	2	1	3	2	2	0	2	1
P0C2X9	12	12	743.58	0.645671	1.1367	Control	Exercise	Delta-1-pyrroline-5-carboxylate dehydrogenase, mitochondrial OS=Rattus norvegicus GN=Aldh4a1 PE=1 SV=1	7.78468e+06	1.62869e+07	6.88748e+06	8.03897e+06	6.76603e+06	1.46221e+07	1.40512e+07	1.82961e+07	5.97581e+06	1.19335e+07	8.49251e+06	9.26123e+06	1.01349e+07	1.11805e+07	1.46928e+07	9.90984e+06	8.58247e+06	1.42954e+07	5.72899e+06	7.15487e+06	5.83105e+06	1.09852e+07	1.41692e+07	1.50078e+07	4.96705e+06	1.02959e+07	7.26892e+06	1.01267e+07	1.01349e+07	1.33318e+07	1.50481e+07	9.64362e+06	7	6	5	5	5	7	7	7	4
P16221	1	1	50.93	0.646045	2.61355	Control	Exercise	Cytochrome c oxidase subunit 8B, mitochondrial OS=Rattus norvegicus GN=Cox8b PE=1 SV=3	163415	3512.76	93020.8	163427	11728.5	941182	715.47	301019	156178	77971.1	9223.95	1480.47	208280	1792.25	31774.2	155347	180162	3083.24	77374.4	145454	10107.8	707085	721.481	246917	129814	67271.4	7894.98	1618.82	208280	2137.1	32542.8	151174	1	0	1	1	0	0	0	1	1
Q62920	1	1	38.42	0.64904	1.3929	Control	Exercise	PDZ and LIM domain protein 5 OS=Rattus norvegicus GN=Pdlim5 PE=1 SV=2	644121	500450	559533	487584	1.16771e+06	101685	488659	71667	764861	97304.8	288242	561960	305234	282120	204509	382841	710132	439257	465418	433961	1.00634e+06	76393.2	492764	58786.4	635747	83952	246712	614475	305234	336404	209456	372556	1	0	0	0	0	0	0	0	1
B0BN68	1	1	61.86	0.658032	1.03742	Exercise	Control	Mitochondrial ribosomal protein S9 OS=Rattus norvegicus GN=Mrps9 PE=2 SV=1	185692	182893	247041	220900	202313	229841	179264	155011	262505	188882	208595	250114	215208	187062	161902	188665	204722	160530	205488	196606	174356	172673	180770	127151	218193	162962	178541	273487	215208	223056	165818	183597	0	1	1	0	1	1	1	1	0
F1MA54	5	4	258.73	0.661659	1.01837	Exercise	Control	[Pyruvate dehydrogenase [lipoamide]] kinase isozyme 1, mitochondrial OS=Rattus norvegicus GN=Pdk1 PE=4 SV=1	1.4409e+06	1.91229e+06	1.42026e+06	1.21094e+06	1.73752e+06	2.65708e+06	2.33794e+06	3.21029e+06	1.72937e+06	2.29176e+06	1.84117e+06	1.82181e+06	2.07083e+06	1.75803e+06	2.69132e+06	2.01547e+06	1.58857e+06	1.67846e+06	1.18137e+06	1.07776e+06	1.49742e+06	1.99619e+06	2.35758e+06	2.63331e+06	1.43744e+06	1.97727e+06	1.57589e+06	1.99206e+06	2.07083e+06	2.0963e+06	2.75642e+06	1.96133e+06	1	1	1	0	0	2	4	1	2
P06685;F1M9H2	18	11	1374.4	0.664254	1.01948	Exercise	Control	Sodium/potassium-transporting ATPase subunit alpha-1 OS=Rattus norvegicus GN=Atp1a1 PE=1 SV=1	8.55288e+06	9.16677e+06	7.71626e+06	6.98367e+06	1.08556e+07	1.1616e+07	8.60125e+06	9.26219e+06	9.26085e+06	1.07303e+07	8.72916e+06	8.80414e+06	9.19401e+06	9.29384e+06	9.82041e+06	8.33912e+06	9.42939e+06	8.0459e+06	6.41837e+06	6.21563e+06	9.35552e+06	8.72681e+06	8.67351e+06	7.59751e+06	7.69756e+06	9.25784e+06	7.47148e+06	9.62688e+06	9.19401e+06	1.10821e+07	1.0058e+07	8.1151e+06	4	7	5	6	5	10	5	5	4
Q5U329	5	5	299.64	0.666313	1.02976	Control	Exercise	Band 3 anion transport protein OS=Rattus norvegicus GN=Slc4a1 PE=2 SV=1	3.67038e+06	2.95233e+06	2.51988e+06	3.8213e+06	2.98162e+06	3.89129e+06	2.99451e+06	2.77186e+06	3.02785e+06	4.27104e+06	3.75564e+06	3.00953e+06	3.84143e+06	2.34603e+06	1.88532e+06	2.72644e+06	4.04653e+06	2.59134e+06	2.09603e+06	3.40105e+06	2.56959e+06	2.92343e+06	3.01967e+06	2.27368e+06	2.51673e+06	3.68494e+06	3.21453e+06	3.29077e+06	3.84143e+06	2.79744e+06	1.93092e+06	2.65319e+06	3	3	3	3	2	5	3	3	2
F1LN92	12	12	727.59	0.667991	1.03955	Exercise	Control	Protein Afg3l2 OS=Rattus norvegicus GN=Afg3l2 PE=3 SV=1	4.96964e+06	4.35863e+06	4.80253e+06	5.45266e+06	5.91935e+06	5.57587e+06	4.13618e+06	6.77206e+06	4.51579e+06	6.94207e+06	6.48745e+06	5.25078e+06	5.38404e+06	5.41788e+06	5.61553e+06	4.03385e+06	5.47894e+06	3.82568e+06	3.99473e+06	4.853e+06	5.10136e+06	4.18901e+06	4.17093e+06	5.55494e+06	3.7535e+06	5.98943e+06	5.55275e+06	5.74147e+06	5.38404e+06	6.46036e+06	5.75136e+06	3.92549e+06	7	8	7	4	6	5	3	7	6
G3V936;Q8VHF5	20	20	1362.72	0.670307	1.0694	Control	Exercise	Citrate synthase OS=Rattus norvegicus GN=Cs PE=3 SV=1	8.41289e+08	8.04096e+08	7.45156e+08	4.11536e+08	5.31547e+08	6.0493e+08	4.67105e+08	4.81933e+08	7.91995e+08	6.94013e+08	5.02891e+08	4.94568e+08	5.39139e+08	5.23609e+08	5.47903e+08	4.76265e+08	9.27506e+08	7.05775e+08	6.19818e+08	3.66276e+08	4.58093e+08	4.54468e+08	4.71029e+08	3.95317e+08	6.58301e+08	5.98776e+08	4.30435e+08	5.40786e+08	5.39139e+08	6.2436e+08	5.61156e+08	4.6347e+08	31	26	26	21	21	18	19	23	28
P0C2C4	1	1	66.99	0.670993	1.04106	Exercise	Control	39S ribosomal protein L10, mitochondrial OS=Rattus norvegicus GN=Mrpl10 PE=1 SV=1	729510	837158	891864	619039	590755	880710	643036	651955	814124	860734	962059	550646	752046	841538	655730	647117	804271	734794	741850	550959	509119	661654	648439	534781	676695	742619	823447	602104	752046	1.00346e+06	671591	629733	0	0	1	0	0	0	1	0	0
D4ADS4;D3ZZQ8	4	4	229.68	0.671041	1.04042	Exercise	Control	Protein Mgst3 OS=Rattus norvegicus GN=Mgst3 PE=4 SV=1	3.96635e+06	2.94733e+06	3.20878e+06	3.0864e+06	4.60881e+06	5.18261e+06	3.51295e+06	2.9176e+06	3.45378e+06	5.75523e+06	3.45635e+06	3.11583e+06	3.42185e+06	3.56103e+06	3.88582e+06	3.97056e+06	4.37283e+06	2.58694e+06	2.66905e+06	2.74696e+06	3.97193e+06	3.89356e+06	3.54246e+06	2.39323e+06	2.87076e+06	4.96546e+06	2.95836e+06	3.40701e+06	3.42185e+06	4.24623e+06	3.97981e+06	3.86389e+06	2	1	2	1	1	2	2	2	2
Q5FWT5	1	1	56.09	0.671341	1.10733	Exercise	Control	Glutamyl-tRNA(Gln) amidotransferase subunit A, mitochondrial OS=Rattus norvegicus GN=Qrsl1 PE=2 SV=1	132662	107139	131691	81138.2	83681.8	149776	168009	117951	124109	242169	121296	108435	117770	178598	115700	68298.1	146257	94038.4	109540	72214.9	72118	112523	169420	96752.1	103159	208937	103820	118568	117770	212963	118498	66463.3	0	0	0	0	0	0	0	0	0
Q3MHS9	1	1	48.23	0.672543	1.36814	Control	Exercise	Chaperonin containing Tcp1, subunit 6A (Zeta 1) OS=Rattus norvegicus GN=Cct6a PE=2 SV=1	385073	182853	156032	6156.15	20823	12367.3	12682.4	14230.7	378137	108024	7698.85	31530.2	15635.4	15456	7965.71	13137	424536	160495	129787	5479.12	17945.5	9291.2	12788.9	11673.1	314305	93200.6	6589.61	34476.7	15635.4	18430	8158.39	12784.1	1	0	0	0	0	0	0	0	0
P13086	13	13	979.25	0.673866	1.04522	Control	Exercise	Succinyl-CoA ligase [ADP/GDP-forming] subunit alpha, mitochondrial OS=Rattus norvegicus GN=Suclg1 PE=2 SV=2	6.25373e+07	7.3168e+07	4.72354e+07	5.02278e+07	4.93861e+07	7.63662e+07	6.28834e+07	7.29617e+07	4.15388e+07	5.79525e+07	5.64834e+07	6.30922e+07	6.54919e+07	6.98417e+07	6.11034e+07	5.7857e+07	6.89462e+07	6.42214e+07	3.92903e+07	4.47039e+07	4.25615e+07	5.73719e+07	6.34117e+07	5.98484e+07	3.45268e+07	4.99999e+07	4.83453e+07	6.89882e+07	6.54919e+07	8.32803e+07	6.25814e+07	5.63028e+07	10	13	8	9	9	11	10	11	8
D3Z9L0	2	2	98.81	0.676596	1.01933	Exercise	Control	Protein Agk OS=Rattus norvegicus GN=Agk PE=4 SV=1	262258	199720	175372	214470	213566	282418	218488	281168	221942	278532	232061	231552	209579	248236	234853	226418	289135	175299	145874	190884	184054	212173	220324	230634	184476	240310	198626	253191	209579	296000	240534	220335	0	0	0	0	1	1	0	0	1
A7M776;A7M775;A7M777;A7M778;D3ZWS9;D4ABK6;E9PSK2	4	4	207.46	0.67693	1.163	Exercise	Control	Protein Kb23 OS=Rattus norvegicus GN=Kb23 PE=2 SV=1	880277	777735	1.3638e+06	1.27199e+06	2.3225e+06	2.87768e+06	1.38292e+06	1.89319e+06	1.04322e+06	2.25684e+06	2.4578e+06	1.45253e+06	4.28874e+06	1.06263e+06	1.38158e+06	908230	970490	682637	1.1344e+06	1.1321e+06	2.00156e+06	2.16193e+06	1.39453e+06	1.55293e+06	867121	1.94714e+06	2.10368e+06	1.58827e+06	4.28874e+06	1.26709e+06	1.415e+06	883831	0	0	0	0	0	0	0	0	0
D3ZP84	13	1	1191.88	0.677674	1.06178	Exercise	Control	Voltage-dependent anion-selective channel protein 3 OS=Rattus norvegicus GN=Vdac3 PE=4 SV=1	359645	398629	291876	419766	317420	825936	593630	940934	286482	513029	387509	430756	493287	740479	945397	607154	396502	349887	242782	373601	273556	620504	598617	771822	238122	442628	331677	471011	493287	882959	968264	590843	0	0	0	0	0	1	1	1	0
Q499N5	13	13	790.72	0.677861	1.10148	Control	Exercise	Acyl-CoA synthetase family member 2, mitochondrial OS=Rattus norvegicus GN=Acsf2 PE=2 SV=1	8.32523e+06	8.08981e+06	6.74765e+06	7.94353e+06	1.25552e+07	1.79195e+07	1.22557e+07	1.38561e+07	7.52185e+06	1.14241e+07	9.67362e+06	1.04321e+07	9.54972e+06	1.28476e+07	8.77903e+06	9.38536e+06	9.17842e+06	7.10063e+06	5.61268e+06	7.06993e+06	1.08202e+07	1.34625e+07	1.23587e+07	1.13658e+07	6.25211e+06	9.85646e+06	8.27986e+06	1.1407e+07	9.54972e+06	1.53197e+07	8.99138e+06	9.13323e+06	6	7	7	6	6	7	6	9	5
D4A264	3	3	133.97	0.680775	1.02835	Exercise	Control	Protein Zadh2 OS=Rattus norvegicus GN=Zadh2 PE=4 SV=1	1.15997e+06	1.51721e+06	1.16576e+06	1.22987e+06	1.33486e+06	1.3862e+06	1.4391e+06	1.6852e+06	1.22761e+06	1.7066e+06	1.21554e+06	1.23868e+06	1.39212e+06	1.55627e+06	1.58855e+06	1.30236e+06	1.27884e+06	1.33169e+06	969679	1.09461e+06	1.1504e+06	1.04141e+06	1.45119e+06	1.38232e+06	1.02038e+06	1.47241e+06	1.04041e+06	1.35443e+06	1.39212e+06	1.85572e+06	1.62697e+06	1.26737e+06	0	0	0	1	1	0	1	0	0
B6DYQ2;B0BN47;D4AB87;Q5BK56;Q9Z1B2	3	3	179.52	0.681191	1.27818	Control	Exercise	Glutathione S-transferase mu 2 OS=Rattus norvegicus GN=Gstm2 PE=2 SV=1	607894	780592	618278	612711	697784	156712	514817	128622	472512	374132	253496	568056	415228	291812	338120	507943	670192	685145	514282	545327	601358	117733	519143	105505	392749	322791	216973	621141	415228	347961	346298	494298	1	1	2	1	2	0	1	0	0
G3V879;Q63619	6	6	367.83	0.681413	1.05928	Exercise	Control	Demethyl-Q 7, isoform CRA_b OS=Rattus norvegicus GN=Coq7 PE=4 SV=1	9.46306e+06	8.92879e+06	8.33651e+06	5.33469e+06	6.47872e+06	7.49346e+06	5.6889e+06	7.65933e+06	1.10363e+07	1.15576e+07	6.28245e+06	6.50269e+06	6.61201e+06	6.59564e+06	7.24057e+06	7.07635e+06	1.04329e+07	7.83702e+06	6.93429e+06	4.748e+06	5.58344e+06	5.62964e+06	5.73669e+06	6.28274e+06	9.17329e+06	9.9716e+06	5.37728e+06	7.11036e+06	6.61201e+06	7.86474e+06	7.41571e+06	6.88625e+06	6	4	5	3	4	2	3	3	5
B1WBN3	5	4	281.88	0.682331	1.03137	Control	Exercise	2-oxoisovalerate dehydrogenase subunit alpha, mitochondrial OS=Rattus norvegicus GN=Bckdha PE=2 SV=1	6.26075e+06	8.8522e+06	5.6946e+06	8.00588e+06	6.48345e+06	8.85169e+06	7.22163e+06	8.83976e+06	5.65156e+06	8.03794e+06	4.64162e+06	6.68351e+06	8.65932e+06	6.67702e+06	1.06058e+07	7.42164e+06	6.90237e+06	7.7698e+06	4.73676e+06	7.12542e+06	5.58751e+06	6.65004e+06	7.2823e+06	7.25101e+06	4.69754e+06	6.93493e+06	3.97286e+06	7.30808e+06	8.65932e+06	7.96178e+06	1.08623e+07	7.22226e+06	1	2	1	2	1	2	2	3	1
P27881;P27926	19	17	1300.4	0.682836	1.03486	Control	Exercise	Hexokinase-2 OS=Rattus norvegicus GN=Hk2 PE=1 SV=1	1.97824e+07	1.2844e+07	1.82507e+07	1.25806e+07	1.62972e+07	1.8235e+07	1.6922e+07	1.92696e+07	1.94822e+07	2.15229e+07	1.56561e+07	1.52533e+07	1.38943e+07	1.85551e+07	1.2979e+07	1.23183e+07	2.18097e+07	1.12735e+07	1.51808e+07	1.1197e+07	1.40452e+07	1.36995e+07	1.70641e+07	1.58063e+07	1.61935e+07	1.85694e+07	1.34004e+07	1.66787e+07	1.38943e+07	2.21254e+07	1.3293e+07	1.19874e+07	11	8	14	13	14	11	12	14	14
D3ZTN2	2	2	80.04	0.683828	1.09576	Exercise	Control	Protein Cmc1 OS=Rattus norvegicus GN=Cmc1 PE=4 SV=1	612073	423073	412723	322997	400632	583879	394301	267962	602116	805471	451844	462598	505135	334108	276018	307633	674799	371342	343302	287475	345269	438653	397614	219801	500475	694939	386743	505828	505135	398395	282694	299369	1	0	1	0	0	1	2	0	1
D3ZH23	1	1	54.76	0.684992	1.11366	Control	Exercise	Protein RGD1560917 OS=Rattus norvegicus GN=RGD1560917 PE=4 SV=1	611395	476897	601248	632159	680496	1.22189e+06	526311	1.24494e+06	607374	679049	693305	524585	737071	531917	709833	900330	674051	418584	500116	562636	586460	917974	530733	1.02119e+06	504846	585865	593415	573607	737071	634266	727003	876143	0	0	0	1	1	1	0	0	0
Q06647	11	11	1241.98	0.685341	1.02008	Exercise	Control	ATP synthase subunit O, mitochondrial OS=Rattus norvegicus GN=Atp5o PE=1 SV=1	3.55684e+08	3.47891e+08	3.34708e+08	2.95564e+08	3.14492e+08	3.70957e+08	3.93229e+08	4.00129e+08	3.07288e+08	3.8399e+08	3.38055e+08	3.23925e+08	3.81038e+08	3.93805e+08	3.92339e+08	3.48702e+08	3.92135e+08	3.05353e+08	2.78409e+08	2.63059e+08	2.71033e+08	2.7869e+08	3.96533e+08	3.28215e+08	2.55416e+08	3.31297e+08	2.89348e+08	3.54196e+08	3.81038e+08	4.69579e+08	4.01829e+08	3.39335e+08	21	21	18	21	20	22	16	21	20
D4A4W6	1	1	43.39	0.688108	1.03407	Exercise	Control	RCG20695, isoform CRA_b OS=Rattus norvegicus GN=Slirp PE=4 SV=1	75141.6	85373.6	33505.9	44869.6	55587.2	66276	72200.6	96334	59643.5	64035.1	55045.4	52021.9	62519.5	83918.4	101613	68526	82842.2	74934.5	27870.1	39935	47905.7	49791.4	72807.2	79020.1	49575.3	55247.8	47114.5	56883.3	62519.5	100066	104070	66685.1	0	1	0	0	0	1	1	1	0
Q5XIC0;Q5M884	7	7	643.76	0.693266	1.03939	Exercise	Control	Enoyl-CoA delta isomerase 2, mitochondrial OS=Rattus norvegicus GN=Eci2 PE=1 SV=1	1.85229e+07	2.35526e+07	1.88554e+07	1.42867e+07	1.36377e+07	2.06131e+07	1.89574e+07	2.09646e+07	1.5551e+07	2.86286e+07	1.76038e+07	1.65557e+07	1.87894e+07	1.93247e+07	2.02781e+07	1.85432e+07	2.04211e+07	2.06727e+07	1.56839e+07	1.27155e+07	1.17531e+07	1.54861e+07	1.91167e+07	1.71967e+07	1.29259e+07	2.47e+07	1.50675e+07	1.81028e+07	1.87894e+07	2.30431e+07	2.07686e+07	1.80451e+07	9	7	10	7	6	7	8	7	8
D4A7L4	6	6	394.8	0.696051	1.02262	Exercise	Control	NADH dehydrogenase (Ubiquinone) 1 beta subcomplex, 11 (Predicted) OS=Rattus norvegicus GN=Ndufb11 PE=4 SV=1	9.29091e+07	8.96953e+07	7.89061e+07	7.24943e+07	8.76779e+07	1.01092e+08	7.41954e+07	9.10795e+07	7.56059e+07	1.0884e+08	8.42809e+07	8.79753e+07	7.93683e+07	8.796e+07	9.44181e+07	8.51627e+07	1.02431e+08	7.87278e+07	6.56339e+07	6.45216e+07	7.55618e+07	7.59476e+07	7.48188e+07	7.471e+07	6.28431e+07	9.39039e+07	7.21378e+07	9.61966e+07	7.93683e+07	1.04885e+08	9.67019e+07	8.28749e+07	8	6	7	6	6	6	4	8	6
Q62669	6	4	444.95	0.696417	1.04618	Exercise	Control	Protein Hbb-b1 OS=Rattus norvegicus GN=MGC72973 PE=2 SV=1	7.97191e+06	4.56997e+06	5.13364e+06	6.80745e+06	6.90021e+06	3.40539e+06	2.84737e+06	2.5947e+06	8.06849e+06	3.74293e+06	5.48579e+06	7.05743e+06	7.52457e+06	1.02977e+06	964085	8.21547e+06	8.78888e+06	4.01118e+06	4.27015e+06	6.05879e+06	5.94668e+06	2.55838e+06	2.87129e+06	2.12836e+06	6.70648e+06	3.2293e+06	4.6954e+06	7.71694e+06	7.52457e+06	1.22791e+06	987405	7.99478e+06	4	2	2	2	2	2	3	0	2
Q8HIC8	1	1	76.44	0.698445	1.01964	Control	Exercise	ATP synthase protein 8 OS=Rattus norvegicus GN=Mt-atp8 PE=3 SV=1	4.46311e+07	5.09786e+07	4.07609e+07	3.93215e+07	3.9831e+07	4.20249e+07	3.69394e+07	4.22638e+07	4.12479e+07	5.0052e+07	4.30006e+07	3.68354e+07	3.60861e+07	4.71837e+07	4.10733e+07	3.47867e+07	4.9205e+07	4.47452e+07	3.39048e+07	3.4997e+07	3.43268e+07	3.15722e+07	3.72498e+07	3.46678e+07	3.4285e+07	4.31836e+07	3.68051e+07	4.02777e+07	3.60861e+07	5.62626e+07	4.20668e+07	3.38522e+07	2	3	3	3	3	2	3	2	3
Q5PQZ9	4	4	240.38	0.698636	1.04395	Exercise	Control	NADH dehydrogenase [ubiquinone] 1 subunit C2 OS=Rattus norvegicus GN=Ndufc2 PE=2 SV=1	3.69429e+07	3.62059e+07	3.75779e+07	4.2504e+07	4.74475e+07	5.41218e+07	4.75004e+07	4.81554e+07	2.87436e+07	4.66942e+07	4.34555e+07	4.68883e+07	4.89102e+07	4.68172e+07	5.99383e+07	4.44118e+07	4.07289e+07	3.17789e+07	3.12572e+07	3.78296e+07	4.08908e+07	4.06603e+07	4.78995e+07	3.95006e+07	2.38915e+07	4.02865e+07	3.71945e+07	5.127e+07	4.89102e+07	5.58256e+07	6.13881e+07	4.32187e+07	3	2	2	2	3	3	4	6	3
Q5U2X7;D4ABJ0	5	5	272.02	0.69866	1.05356	Control	Exercise	Mitochondrial import inner membrane translocase subunit Tim21 OS=Rattus norvegicus GN=Timm21 PE=2 SV=1	1.26458e+06	1.42538e+06	1.21972e+06	1.27496e+06	2.08078e+06	1.90233e+06	1.11349e+06	1.84366e+06	1.09784e+06	2.03072e+06	1.55869e+06	1.39461e+06	1.34669e+06	1.36351e+06	1.43278e+06	1.2837e+06	1.39417e+06	1.25109e+06	1.01456e+06	1.13474e+06	1.79324e+06	1.42917e+06	1.12284e+06	1.5123e+06	912517	1.75206e+06	1.33412e+06	1.52493e+06	1.34669e+06	1.62587e+06	1.46744e+06	1.24921e+06	4	4	3	3	2	4	3	4	3
Q68FX0	14	14	1016.99	0.698894	1.03288	Exercise	Control	Isocitrate dehydrogenase [NAD] subunit beta, mitochondrial OS=Rattus norvegicus GN=Idh3B PE=1 SV=1	4.80798e+07	5.79007e+07	3.94813e+07	3.64779e+07	4.46284e+07	5.65374e+07	5.47697e+07	5.59973e+07	3.88839e+07	6.09341e+07	5.07265e+07	4.32297e+07	4.60987e+07	6.27226e+07	5.49858e+07	4.924e+07	5.30071e+07	5.08209e+07	3.28404e+07	3.24662e+07	3.84612e+07	4.2475e+07	5.52299e+07	4.5933e+07	3.23201e+07	5.25723e+07	4.34179e+07	4.72695e+07	4.60987e+07	7.47914e+07	5.63158e+07	4.79172e+07	12	11	9	8	13	11	10	12	10
D3ZZY4	1	1	42.57	0.698959	1.31832	Control	Exercise	Protein LOC100360426 OS=Rattus norvegicus GN=LOC100360426 PE=4 SV=1	5625.56	11100	11736.6	8072.62	22824.5	31993.4	10180.4	44417	12011.2	20140.8	10596.2	6755.93	15792.2	12177.3	22954.8	10280.9	6202.07	9742.78	9762.48	7184.82	19670.5	24035.8	10265.9	36434	9983.66	17376.9	9069.5	7387.27	15792.2	14520.4	23510.1	10004.7	0	0	0	0	0	0	0	0	0
G3V8F9	1	1	40.33	0.700546	1.04533	Control	Exercise	Alpha-methylacyl-CoA racemase OS=Rattus norvegicus GN=Amacr PE=4 SV=1	74915.6	230859	107084	70231.6	151139	91383.7	326908	73948.4	112665	93740	153649	124189	169877	171883	157439	94177.4	82593.1	202630	89072	62507.8	130253	68654.2	329654	60657.8	93646.4	80876.4	131511	135794	169877	204956	161247	91647.5	0	0	0	0	0	0	1	0	0
Q6PCU0	16	16	1144.5	0.702284	1.02504	Exercise	Control	ATP synthase gamma chain OS=Rattus norvegicus GN=Atp5c1 PE=2 SV=1	2.49093e+08	2.61831e+08	2.4584e+08	2.31031e+08	2.52162e+08	3.14421e+08	2.68137e+08	3.19068e+08	2.20347e+08	3.23031e+08	2.73257e+08	2.38575e+08	2.62775e+08	2.89479e+08	3.09779e+08	2.77963e+08	2.74621e+08	2.29816e+08	2.04489e+08	2.05623e+08	2.17316e+08	2.36217e+08	2.7039e+08	2.61723e+08	1.83151e+08	2.78703e+08	2.33886e+08	2.6087e+08	2.62775e+08	3.4518e+08	3.17272e+08	2.70496e+08	19	18	15	20	16	16	17	18	20
G3V8U8	13	13	1039.17	0.70352	1.02737	Control	Exercise	Branched-chain-amino-acid aminotransferase OS=Rattus norvegicus GN=Bcat2 PE=3 SV=1	7.19684e+07	9.30232e+07	7.87583e+07	7.36547e+07	6.03721e+07	8.16382e+07	6.85168e+07	9.05737e+07	6.26267e+07	1.01853e+08	7.22492e+07	6.55908e+07	7.02834e+07	7.4178e+07	8.4948e+07	7.03011e+07	7.93438e+07	8.16488e+07	6.5511e+07	6.55544e+07	5.20294e+07	6.13326e+07	6.90924e+07	7.42951e+07	5.20549e+07	8.78758e+07	6.18396e+07	7.17203e+07	7.02834e+07	8.8451e+07	8.70028e+07	6.84125e+07	13	17	17	17	16	16	16	15	14
B2RYW8	1	1	34.82	0.703866	1.05012	Exercise	Control	Mitochondrial inner membrane organizing system protein 1 OS=Rattus norvegicus GN=Minos1 PE=3 SV=1	4.61619e+06	5.36273e+06	4.68721e+06	4.46034e+06	4.74705e+06	5.6454e+06	4.79081e+06	4.94399e+06	4.41718e+06	8.1078e+06	5.65793e+06	4.68188e+06	4.57659e+06	4.65327e+06	4.80109e+06	4.32533e+06	5.08926e+06	4.707e+06	3.89881e+06	3.9698e+06	4.09106e+06	4.24124e+06	4.83106e+06	4.05542e+06	3.67153e+06	6.9952e+06	4.84274e+06	5.1194e+06	4.57659e+06	5.54863e+06	4.91722e+06	4.20913e+06	0	0	0	0	0	1	0	0	0
Q4G069	6	6	296.23	0.70476	1.01854	Control	Exercise	Regulator of microtubule dynamics protein 1 OS=Rattus norvegicus GN=Fam82b PE=2 SV=1	5.69898e+06	5.53728e+06	4.65794e+06	5.61138e+06	5.32665e+06	6.32103e+06	5.05706e+06	5.98713e+06	4.85993e+06	6.68397e+06	5.499e+06	4.85912e+06	5.07851e+06	5.44382e+06	5.58759e+06	5.38113e+06	6.28302e+06	4.86021e+06	3.87446e+06	4.99426e+06	4.59057e+06	4.74882e+06	5.09955e+06	4.91107e+06	4.03955e+06	5.76676e+06	4.70672e+06	5.3132e+06	5.07851e+06	6.49129e+06	5.72275e+06	5.23657e+06	3	3	3	3	3	4	3	4	1
Q3V5X8	3	3	189.23	0.705527	1.03539	Control	Exercise	Endonuclease G OS=Rattus norvegicus GN=Endog PE=2 SV=1	3.24826e+06	4.06629e+06	3.86119e+06	2.64309e+06	2.26738e+06	3.13217e+06	2.71092e+06	3.1247e+06	2.90761e+06	4.50729e+06	3.57116e+06	2.79654e+06	2.80705e+06	2.60954e+06	2.22104e+06	2.7775e+06	3.58115e+06	3.56908e+06	3.21173e+06	2.35241e+06	1.95405e+06	2.35312e+06	2.7337e+06	2.56311e+06	2.41679e+06	3.88877e+06	3.05664e+06	3.05788e+06	2.80705e+06	3.11166e+06	2.27476e+06	2.70289e+06	0	0	1	0	1	1	1	1	0
Q5BK63	18	18	1607.27	0.70589	1.02601	Control	Exercise	NADH dehydrogenase [ubiquinone] 1 alpha subcomplex subunit 9, mitochondrial OS=Rattus norvegicus GN=Ndufa9 PE=1 SV=2	2.50716e+08	2.32157e+08	1.92556e+08	1.69998e+08	2.11623e+08	2.40235e+08	1.98655e+08	2.34432e+08	2.38936e+08	2.3654e+08	1.84411e+08	1.78101e+08	2.00379e+08	2.28866e+08	2.23899e+08	1.95378e+08	2.7641e+08	2.0377e+08	1.60168e+08	1.51302e+08	1.82379e+08	1.80482e+08	2.00324e+08	1.92298e+08	1.98602e+08	2.04081e+08	1.57842e+08	1.94745e+08	2.00379e+08	2.72903e+08	2.29315e+08	1.90129e+08	22	21	19	21	22	22	19	18	24
B1WBX2	1	1	42.82	0.706429	1.02087	Control	Exercise	Protein Tmem69 OS=Rattus norvegicus GN=Tmem69 PE=2 SV=1	263279	329069	249497	288671	345784	298250	316185	343071	206465	252281	372765	285652	310295	284200	385570	286820	290260	288832	207531	256924	298000	224067	318841	281411	171612	217662	319058	312346	310295	338884	394896	279114	0	0	1	0	0	0	0	0	0
Q62651	12	11	915	0.710154	1.03277	Exercise	Control	Delta(3,5)-Delta(2,4)-dienoyl-CoA isomerase, mitochondrial OS=Rattus norvegicus GN=Ech1 PE=1 SV=2	4.92163e+07	4.29239e+07	4.24534e+07	4.59396e+07	4.86426e+07	3.47475e+07	3.48835e+07	3.43452e+07	4.89715e+07	5.5018e+07	4.15963e+07	4.37532e+07	3.47885e+07	3.79707e+07	3.47317e+07	4.72402e+07	5.42601e+07	3.76753e+07	3.53126e+07	4.08873e+07	4.19208e+07	2.61049e+07	3.51766e+07	2.81724e+07	4.07048e+07	4.7468e+07	3.56032e+07	4.78419e+07	3.47885e+07	4.52769e+07	3.55718e+07	4.59711e+07	11	9	10	11	11	7	9	8	11
G3V9T4	2	2	116.65	0.712567	1.02907	Exercise	Control	Transmembrane protein 38a (Predicted), isoform CRA_b OS=Rattus norvegicus GN=Tmem38a PE=4 SV=1	1.74359e+06	1.94519e+06	2.22543e+06	2.2709e+06	2.27936e+06	1.81889e+06	2.20027e+06	1.28717e+06	2.61252e+06	1.99878e+06	2.05444e+06	2.24423e+06	1.86783e+06	2.02475e+06	1.49841e+06	1.92824e+06	1.92228e+06	1.70734e+06	1.85111e+06	2.02115e+06	1.96438e+06	1.36648e+06	2.21876e+06	1.05583e+06	2.17151e+06	1.72449e+06	1.75844e+06	2.45395e+06	1.86783e+06	2.41434e+06	1.53465e+06	1.87644e+06	2	1	1	2	2	2	2	1	2
Q8VHW7	1	1	83.66	0.714048	1.00881	Exercise	Control	Voltage-dependent calcium channel gamma-6 subunit OS=Rattus norvegicus GN=Cacng6 PE=2 SV=1	114338	152974	256876	164924	312370	281633	239963	202790	243663	166846	230480	191777	229204	201075	219969	258051	126056	134269	213669	146786	269204	211584	241979	166343	202531	143951	197273	209698	229204	239765	225290	251119	0	0	0	1	0	1	1	0	0
P10860	20	20	1389.56	0.715213	1.0216	Exercise	Control	Glutamate dehydrogenase 1, mitochondrial OS=Rattus norvegicus GN=Glud1 PE=1 SV=2	8.94821e+07	9.38198e+07	8.04997e+07	7.87333e+07	7.5587e+07	9.75637e+07	1.12876e+08	1.00572e+08	7.42081e+07	1.07095e+08	8.95346e+07	8.74118e+07	9.82719e+07	9.41323e+07	1.05204e+08	8.90238e+07	9.86524e+07	8.2348e+07	6.69595e+07	7.00745e+07	6.51418e+07	7.32971e+07	1.13824e+08	8.24961e+07	6.16813e+07	9.23988e+07	7.66346e+07	9.55804e+07	9.82719e+07	1.12245e+08	1.07749e+08	8.66323e+07	15	14	16	14	16	12	18	17	16
D3ZVU2	1	1	40.37	0.717613	1.06086	Control	Exercise	Protein Mtmr15 OS=Rattus norvegicus GN=Fan1 PE=4 SV=1	262152	149707	211465	158009	192506	102571	149156	143299	158691	178431	234641	142364	188518	117007	118941	151741	289018	131402	175896	140631	165904	77059.2	150409	117544	131903	153945	200835	155668	188518	139521	121818	147664	0	0	0	0	0	0	1	1	0
Q9WV97	1	1	36.14	0.718361	1.02508	Exercise	Control	Mitochondrial import inner membrane translocase subunit Tim9 OS=Rattus norvegicus GN=Timm9 PE=1 SV=3	1.12604e+06	1.16805e+06	1.32113e+06	1.02196e+06	1.00769e+06	1.0523e+06	948937	1.30738e+06	1.11632e+06	1.43759e+06	1.19019e+06	1.11835e+06	1.0017e+06	1.29824e+06	970779	1.04488e+06	1.24144e+06	1.02522e+06	1.09892e+06	909568	868435	790564	956910	1.07241e+06	927881	1.24032e+06	1.01871e+06	1.22286e+06	1.0017e+06	1.54804e+06	994260	1.01681e+06	0	0	0	0	0	1	0	0	0
F1LR49	4	4	294.87	0.719698	1.02267	Control	Exercise	Hexaprenyldihydroxybenzoate methyltransferase, mitochondrial (Fragment) OS=Rattus norvegicus GN=Coq3 PE=4 SV=1	1.03988e+07	1.25594e+07	1.14577e+07	1.29252e+07	9.74291e+06	1.13286e+07	8.32462e+06	1.15971e+07	1.11949e+07	1.61959e+07	1.02111e+07	9.26126e+06	1.01498e+07	1.0816e+07	9.89001e+06	8.65697e+06	1.14645e+07	1.10237e+07	9.53051e+06	1.15037e+07	8.39655e+06	8.51087e+06	8.39457e+06	9.51279e+06	9.30517e+06	1.39734e+07	8.73993e+06	1.01267e+07	1.01498e+07	1.28972e+07	1.01292e+07	8.42441e+06	3	4	1	2	3	2	3	3	2
Q68FU3	22	22	1809.15	0.72058	1.02533	Exercise	Control	Electron transfer flavoprotein subunit beta OS=Rattus norvegicus GN=Etfb PE=2 SV=3	3.93957e+08	3.92069e+08	3.78585e+08	4.1797e+08	4.66501e+08	4.88378e+08	4.45355e+08	5.05401e+08	3.54606e+08	4.90005e+08	4.47999e+08	3.8591e+08	4.48506e+08	4.21893e+08	5.31868e+08	4.95779e+08	4.3433e+08	3.44128e+08	3.14906e+08	3.72003e+08	4.02036e+08	3.66905e+08	4.49097e+08	4.14567e+08	2.94747e+08	4.22763e+08	3.83452e+08	4.21973e+08	4.48506e+08	5.03071e+08	5.44733e+08	4.82461e+08	31	32	29	31	28	28	27	32	31
Q64057	7	7	369.54	0.720779	1.06474	Control	Exercise	Alpha-aminoadipic semialdehyde dehydrogenase OS=Rattus norvegicus GN=Aldh7a1 PE=1 SV=2	2.99461e+06	3.19836e+06	3.01631e+06	2.0134e+06	2.42009e+06	3.2058e+06	5.05658e+06	3.67959e+06	2.8282e+06	4.03994e+06	2.46771e+06	2.71786e+06	2.86269e+06	2.74454e+06	2.99684e+06	3.37141e+06	3.3015e+06	2.80728e+06	2.50896e+06	1.79198e+06	2.08567e+06	2.40843e+06	5.09906e+06	3.01826e+06	2.35078e+06	3.48555e+06	2.11217e+06	2.97185e+06	2.86269e+06	3.27263e+06	3.06933e+06	3.28084e+06	2	1	2	0	0	2	4	1	0
Q5XIC2	1	1	53.31	0.723034	1.02378	Control	Exercise	Evolutionarily conserved signaling intermediate in Toll pathway, mitochondrial OS=Rattus norvegicus GN=Ecsit PE=2 SV=1	205753	156208	202241	248272	225563	229442	200316	218868	193819	258926	184120	228985	204310	238338	188936	150054	226839	137108	168223	220968	194393	172374	201999	179532	161101	223394	157592	250384	204310	284198	193506	146023	1	0	1	1	1	1	1	1	0
F1LN28	1	1	36.33	0.723701	1.02833	Exercise	Control	Slit homolog 2 protein OS=Rattus norvegicus GN=Slit2 PE=4 SV=1	44508.7	40397.4	32233.2	41255	40117.7	29386.1	31805.1	48516.3	35243.9	47743.8	47618.8	39697.4	34865.1	31603	35288.4	44891.4	49070.1	35457.8	26811.5	36718	34573.9	22077	32072.3	39796.6	29294.5	41192.1	40758	43407.1	34865.1	37683.9	36142	43685.5	0	0	0	0	0	0	0	0	0
Q2TA68;D4A8U5	10	10	560.2	0.725365	1.02639	Control	Exercise	Dynamin-like 120 kDa protein, mitochondrial OS=Rattus norvegicus GN=Opa1 PE=1 SV=1	3.27563e+06	3.87946e+06	2.65264e+06	2.87989e+06	3.98056e+06	3.26529e+06	3.07959e+06	3.84811e+06	2.76815e+06	4.45273e+06	3.15327e+06	2.96917e+06	2.9332e+06	3.58589e+06	3.21037e+06	3.09774e+06	3.61132e+06	3.4051e+06	2.20646e+06	2.56317e+06	3.43049e+06	2.45313e+06	3.10546e+06	3.1565e+06	2.30087e+06	3.8417e+06	2.69895e+06	3.24664e+06	2.9332e+06	4.27587e+06	3.28803e+06	3.01452e+06	4	5	5	4	5	5	5	5	2
P56571	13	13	969.7	0.725778	1.04138	Exercise	Control	ES1 protein homolog, mitochondrial OS=Rattus norvegicus PE=1 SV=2	1.43461e+08	1.35322e+08	1.43372e+08	1.58703e+08	1.53745e+08	1.67358e+08	1.89359e+08	2.03037e+08	1.16586e+08	1.53875e+08	1.70251e+08	1.55795e+08	1.43688e+08	2.14755e+08	2.14311e+08	1.78658e+08	1.58163e+08	1.18775e+08	1.19257e+08	1.41249e+08	1.32499e+08	1.25731e+08	1.9095e+08	1.66545e+08	9.69053e+07	1.32759e+08	1.45722e+08	1.70354e+08	1.43688e+08	2.56078e+08	2.19495e+08	1.73858e+08	13	11	13	13	13	10	14	14	12
P85834;F8WFG8	18	18	1355.57	0.727083	1.02847	Exercise	Control	Elongation factor Tu, mitochondrial OS=Rattus norvegicus GN=Tufm PE=1 SV=1	7.66682e+07	8.62772e+07	6.93819e+07	6.72385e+07	6.54901e+07	8.03588e+07	7.14437e+07	8.61378e+07	6.2745e+07	9.83792e+07	7.36661e+07	7.04613e+07	7.80179e+07	9.25986e+07	7.43022e+07	6.99959e+07	8.45253e+07	7.57276e+07	5.77117e+07	5.98439e+07	5.64402e+07	6.03714e+07	7.20439e+07	7.06565e+07	5.21532e+07	8.4879e+07	6.30524e+07	7.70459e+07	7.80179e+07	1.10416e+08	7.60995e+07	6.81155e+07	19	18	14	15	17	15	16	20	16
F1LQP2;D3ZPX5	3	3	152.24	0.727635	1.05165	Control	Exercise	Threonine--tRNA ligase, mitochondrial OS=Rattus norvegicus GN=Tars2 PE=3 SV=1	304828	399554	452168	452299	398277	614476	384046	621138	382910	485885	396691	391643	356765	400715	456447	577620	336067	350698	376113	402557	343240	461639	387273	509502	318272	419209	339536	428242	356765	477819	467488	562103	0	0	0	0	0	1	1	3	0
G3V7Y3	3	3	275.23	0.728343	1.02983	Exercise	Control	ATP synthase subunit delta, mitochondrial OS=Rattus norvegicus GN=Atp5d PE=3 SV=1	1.35572e+08	1.07095e+08	9.21121e+07	9.83668e+07	1.00721e+08	1.13404e+08	9.91107e+07	1.13984e+08	8.98254e+07	1.44935e+08	1.17493e+08	1.0467e+08	9.87379e+07	1.10492e+08	1.25007e+08	9.48682e+07	1.49465e+08	9.39999e+07	7.66186e+07	8.75487e+07	8.68029e+07	8.51975e+07	9.99434e+07	9.34976e+07	7.46623e+07	1.25046e+08	1.00565e+08	1.14451e+08	9.87379e+07	1.31753e+08	1.2803e+08	9.23197e+07	4	3	3	3	3	4	3	4	3
B2GUZ6	5	5	316.84	0.728815	1.03274	Control	Exercise	Protein Rtn4ip1 OS=Rattus norvegicus GN=Rtn4ip1 PE=2 SV=1	3.8473e+06	3.61477e+06	2.75285e+06	2.78828e+06	3.04718e+06	3.98473e+06	3.31897e+06	4.48461e+06	2.84002e+06	4.51793e+06	3.43374e+06	3.26831e+06	2.79471e+06	3.47865e+06	3.49745e+06	3.12547e+06	4.24158e+06	3.17278e+06	2.28982e+06	2.48164e+06	2.62609e+06	2.99362e+06	3.34686e+06	3.6786e+06	2.36061e+06	3.89795e+06	2.93901e+06	3.57373e+06	2.79471e+06	4.148e+06	3.58205e+06	3.04151e+06	2	2	4	2	0	2	1	1	2
D3ZZD3;D3ZHH2	3	3	214.55	0.729905	1.01745	Control	Exercise	Sideroflexin-3 OS=Rattus norvegicus GN=Sfxn3 PE=4 SV=1	2.08271e+06	2.05496e+06	1.46485e+06	1.34597e+06	1.77675e+06	1.67316e+06	1.61561e+06	1.64496e+06	2.43334e+06	1.9934e+06	1.80946e+06	1.43811e+06	1.11673e+06	1.96633e+06	1.39198e+06	1.27541e+06	2.29615e+06	1.80369e+06	1.21846e+06	1.19794e+06	1.53122e+06	1.257e+06	1.62918e+06	1.34931e+06	2.02258e+06	1.71985e+06	1.54875e+06	1.5725e+06	1.11673e+06	2.34469e+06	1.42564e+06	1.24115e+06	2	2	1	1	2	0	1	1	2
Q4G012	1	1	58.37	0.73056	1.03092	Exercise	Control	UPF0562 protein C7orf55 homolog OS=Rattus norvegicus PE=2 SV=1	607313	651470	559575	517325	441193	713642	571745	917254	448779	867879	632614	697733	683824	661903	589063	551698	669551	571811	465453	460431	380225	536140	576548	752398	373023	748783	541468	762936	683824	789263	603311	536877	0	0	0	0	0	0	0	0	0
D3ZJN5	34	17	2572.65	0.73314	1.01605	Exercise	Control	Sarcoplasmic/endoplasmic reticulum calcium ATPase 2 OS=Rattus norvegicus GN=Atp2a2 PE=3 SV=1	2.17427e+07	2.00932e+07	3.56668e+07	4.42749e+07	3.26835e+07	3.23784e+07	4.81769e+07	2.11607e+07	3.24378e+07	2.90965e+07	3.26295e+07	4.48941e+07	3.53108e+07	3.23936e+07	2.19117e+07	3.16146e+07	2.3971e+07	1.76363e+07	2.96675e+07	3.94057e+07	2.8167e+07	2.4325e+07	4.85817e+07	1.73575e+07	2.69621e+07	2.51037e+07	2.79283e+07	4.90894e+07	3.53108e+07	3.86266e+07	2.24417e+07	3.07653e+07	10	9	13	12	9	12	16	9	9
P15650	26	25	2140.78	0.73519	1.02329	Exercise	Control	Long-chain specific acyl-CoA dehydrogenase, mitochondrial OS=Rattus norvegicus GN=Acadl PE=1 SV=1	7.85401e+08	8.35817e+08	7.42894e+08	7.74521e+08	7.42451e+08	9.28063e+08	7.44463e+08	8.64638e+08	6.60971e+08	1.05092e+09	7.93993e+08	7.79404e+08	8.25602e+08	7.7928e+08	8.5706e+08	8.20479e+08	8.6589e+08	7.33618e+08	6.17937e+08	6.89342e+08	6.39853e+08	6.97229e+08	7.50718e+08	7.09239e+08	5.49395e+08	9.06709e+08	6.79596e+08	8.52239e+08	8.25602e+08	9.29226e+08	8.7779e+08	7.98437e+08	36	42	37	33	36	35	37	35	37
P57113	7	7	354.77	0.73539	1.03933	Control	Exercise	Maleylacetoacetate isomerase OS=Rattus norvegicus GN=Gstz1 PE=1 SV=2	1.25683e+06	8.65721e+06	7.61925e+06	2.8487e+06	2.92317e+06	7.32286e+06	7.3588e+06	2.23958e+06	1.08749e+06	1.49407e+07	1.7716e+06	4.6112e+06	5.02637e+06	2.08693e+06	5.07901e+06	4.10092e+06	1.38563e+06	7.59865e+06	6.33767e+06	2.53541e+06	2.51922e+06	5.50147e+06	7.42063e+06	1.83707e+06	903917	1.28904e+07	1.51635e+06	5.04212e+06	5.02637e+06	2.48849e+06	5.20187e+06	3.99076e+06	0	3	2	0	2	1	6	0	0
D3ZJ08	2	1	84.64	0.736199	1.10022	Control	Exercise	Histone H3 OS=Rattus norvegicus GN=Hist2h3c PE=3 SV=1	416596	612151	908239	388612	3.24316e+06	1.44659e+06	627819	219750	3.69928e+06	388125	315407	439475	563419	460606	439548	840788	459290	537300	755471	345874	2.79499e+06	1.08678e+06	633093	180255	3.07482e+06	334864	269963	480544	563419	549234	450180	818201	0	0	0	0	0	0	0	0	1
P49134	1	1	38.41	0.73676	1.02189	Control	Exercise	Integrin beta-1 OS=Rattus norvegicus GN=Itgb1 PE=2 SV=1	41982.4	48753.8	83602.4	115059	121386	168419	86489.4	176765	84086.1	107067	124691	102472	118960	115061	62066.7	110010	46284.8	42792.4	69540.2	102405	104612	126529	87216.1	144996	69891.8	92374.4	106725	112048	118960	137201	63567.9	107054	0	0	0	0	0	0	1	0	0
H6X2W5	1	1	46.27	0.737436	1.06303	Control	Exercise	C-reactive protein, pentraxin-related OS=Rattus norvegicus GN=crp PE=4 SV=1	92094.4	37424.9	56425.6	63041.8	82103.5	43335.2	93320.5	61023.8	77446.7	43929.2	78560.4	64518.4	85511.7	63007.4	33039.2	51404.8	101532	32848.7	46934.7	56108.7	70757.7	32556.6	94104.6	50056.1	64373.2	37901	67241.5	70547.6	85511.7	75131	33838.3	50023.8	0	0	0	0	1	0	0	0	0
G3V9J8	1	1	53.92	0.739246	1.02282	Exercise	Control	Glycerol-3-phosphate acyltransferase 1, mitochondrial OS=Rattus norvegicus GN=Gpam PE=4 SV=1	272618	310852	307995	271506	350804	303907	378281	468865	334200	354220	368025	288559	361245	340044	420131	259221	300557	272842	256190	241647	302327	228317	381459	384597	277785	305611	315000	315524	361245	405473	430293	252257	0	0	0	0	0	0	0	0	1
F1LXA0	8	6	581.04	0.739334	1.01483	Control	Exercise	Protein Ndufa12 (Fragment) OS=Rattus norvegicus GN=Ndufa12 PE=4 SV=1	6.54031e+07	6.51983e+07	5.53514e+07	5.67004e+07	6.24704e+07	7.21804e+07	6.16765e+07	6.73563e+07	5.45649e+07	7.13919e+07	5.63121e+07	6.0349e+07	5.83472e+07	7.03698e+07	7.37519e+07	5.38504e+07	7.21057e+07	5.72262e+07	4.60412e+07	5.04647e+07	5.38377e+07	5.42272e+07	6.21947e+07	5.52505e+07	4.5354e+07	6.15951e+07	4.81987e+07	6.59886e+07	5.83472e+07	8.39101e+07	7.55359e+07	5.24038e+07	8	7	6	6	10	6	8	11	7
P13221	5	5	282.33	0.739945	1.30709	Control	Exercise	Aspartate aminotransferase, cytoplasmic OS=Rattus norvegicus GN=Got1 PE=1 SV=3	2.47451e+06	1.93506e+06	2.03563e+06	1.88451e+06	1.86139e+06	283021	1.00594e+06	266861	1.88847e+06	468852	739601	1.9127e+06	804743	859940	663136	1.6496e+06	2.7281e+06	1.69845e+06	1.69323e+06	1.67726e+06	1.60417e+06	212626	1.01439e+06	218899	1.56969e+06	404513	633041	2.09145e+06	804743	1.02541e+06	679176	1.60529e+06	3	2	3	2	2	0	0	0	3
P29410	6	6	424.4	0.740636	1.02517	Exercise	Control	Adenylate kinase 2, mitochondrial OS=Rattus norvegicus GN=Ak2 PE=2 SV=2	1.03261e+07	1.13219e+07	1.14303e+07	9.60403e+06	1.11477e+07	1.48026e+07	1.11581e+07	1.34032e+07	1.09503e+07	1.60793e+07	1.1566e+07	1.00765e+07	1.23515e+07	1.26571e+07	1.09758e+07	1.08833e+07	1.13843e+07	9.93755e+06	9.50767e+06	8.54781e+06	9.60719e+06	1.11208e+07	1.12519e+07	1.09943e+07	9.10186e+06	1.38728e+07	9.8996e+06	1.10182e+07	1.23515e+07	1.50925e+07	1.12413e+07	1.05909e+07	5	4	4	4	4	5	4	4	4
Q07803;F1LMM9	13	13	718.31	0.740647	1.03117	Exercise	Control	Elongation factor G, mitochondrial OS=Rattus norvegicus GN=Gfm1 PE=1 SV=2	1.25779e+07	1.17293e+07	1.22648e+07	1.07084e+07	8.82574e+06	1.14696e+07	1.04587e+07	1.23006e+07	1.25186e+07	1.54719e+07	1.24452e+07	9.09386e+06	1.03858e+07	1.16867e+07	1.17342e+07	9.81436e+06	1.38669e+07	1.02951e+07	1.02018e+07	9.53074e+06	7.60613e+06	8.61684e+06	1.05466e+07	1.00898e+07	1.04054e+07	1.33487e+07	1.06521e+07	9.94368e+06	1.03858e+07	1.39354e+07	1.2018e+07	9.55071e+06	9	7	7	7	5	6	8	7	9
D3ZVS2	13	13	718	0.741843	1.07157	Exercise	Control	L-2-hydroxyglutarate dehydrogenase (Predicted) OS=Rattus norvegicus GN=L2hgdh PE=4 SV=1	7.95837e+06	8.75261e+06	6.25414e+06	9.00307e+06	8.47728e+06	1.36056e+07	8.78016e+06	1.11767e+07	5.52061e+06	1.01609e+07	1.10763e+07	8.10603e+06	1.00897e+07	1.48287e+07	6.75109e+06	1.27713e+07	8.77395e+06	7.68238e+06	5.20217e+06	8.01294e+06	7.30582e+06	1.02215e+07	8.85393e+06	9.16796e+06	4.5887e+06	8.76659e+06	9.48048e+06	8.86354e+06	1.00897e+07	1.7682e+07	6.91438e+06	1.24282e+07	5	7	5	7	4	7	6	5	4
Q58FK9;F1M572	11	11	685.22	0.742469	1.01094	Exercise	Control	Kynurenine--oxoglutarate transaminase 3 OS=Rattus norvegicus GN=Ccbl2 PE=2 SV=1	1.76896e+07	2.30409e+07	1.78489e+07	1.07485e+07	1.70753e+07	2.13828e+07	2.17915e+07	2.37279e+07	1.92708e+07	1.75357e+07	1.98453e+07	1.63197e+07	1.9106e+07	2.14678e+07	2.22223e+07	1.92146e+07	1.95024e+07	2.02236e+07	1.48466e+07	9.56644e+06	1.47157e+07	1.60643e+07	2.19746e+07	1.94633e+07	1.60178e+07	1.51294e+07	1.69861e+07	1.78448e+07	1.9106e+07	2.55986e+07	2.27598e+07	1.86984e+07	4	7	6	4	6	7	8	6	4
B0BMY8	2	1	104.03	0.743473	1.17477	Control	Exercise	Histone H3 OS=Rattus norvegicus GN=H3f3b PE=2 SV=1	1.80221e+06	2.58279e+06	4.50258e+06	2.55666e+06	1.68064e+07	7.54665e+06	2.9573e+06	679533	1.79944e+07	1.86785e+06	2.02173e+06	2.25146e+06	2.70455e+06	2.07212e+06	1.67612e+06	2.97917e+06	1.9869e+06	2.26698e+06	3.74523e+06	2.27548e+06	1.44839e+07	5.6696e+06	2.98214e+06	557402	1.49569e+07	1.61153e+06	1.73044e+06	2.46186e+06	2.70455e+06	2.47083e+06	1.71666e+06	2.89914e+06	0	0	0	0	0	0	0	0	1
Q6P6R2;D3ZIY6	21	21	2080.29	0.743779	1.01975	Exercise	Control	Dihydrolipoyl dehydrogenase, mitochondrial OS=Rattus norvegicus GN=Dld PE=1 SV=1	5.52903e+08	5.20686e+08	5.35438e+08	4.13685e+08	3.85847e+08	4.72662e+08	3.9136e+08	4.83637e+08	5.08812e+08	6.10604e+08	4.96229e+08	4.18985e+08	4.51474e+08	4.58089e+08	4.40788e+08	4.45409e+08	6.09565e+08	4.57019e+08	4.45376e+08	3.68189e+08	3.32527e+08	3.55098e+08	3.94648e+08	3.96714e+08	4.22921e+08	5.26813e+08	4.24733e+08	4.58139e+08	4.51474e+08	5.46232e+08	4.5145e+08	4.33444e+08	40	43	44	41	37	37	34	32	43
B5DEN4;D3ZM24;F1LXX4;F1M2L5;F1M7I5;P19629	9	6	496.16	0.74446	1.21349	Control	Exercise	L-lactate dehydrogenase OS=Rattus norvegicus GN=Ldha PE=2 SV=1	5.34818e+06	4.90446e+06	5.85252e+06	5.09115e+06	6.08043e+06	949313	4.04191e+06	1.29381e+06	5.62739e+06	1.50345e+06	2.18177e+06	4.71789e+06	2.85598e+06	3.79154e+06	2.49792e+06	4.48118e+06	5.89627e+06	4.30476e+06	4.86811e+06	4.53124e+06	5.24019e+06	713194	4.07587e+06	1.06127e+06	4.67745e+06	1.29714e+06	1.86742e+06	5.15878e+06	2.85598e+06	4.52109e+06	2.55834e+06	4.3608e+06	5	6	4	4	4	1	4	0	5
B2RYS2	6	6	325.05	0.74471	1.01637	Control	Exercise	Protein Uqcrb OS=Rattus norvegicus GN=Uqcrb PE=4 SV=1	1.10879e+08	1.11624e+08	1.0307e+08	1.06789e+08	1.21144e+08	1.39619e+08	1.11207e+08	1.23023e+08	9.45135e+07	1.22617e+08	1.23908e+08	1.00004e+08	1.08203e+08	1.17681e+08	1.28376e+08	1.17114e+08	1.22242e+08	9.79754e+07	8.57336e+07	9.50446e+07	1.04403e+08	1.04892e+08	1.12141e+08	1.00912e+08	7.8559e+07	1.05791e+08	1.06055e+08	1.09349e+08	1.08203e+08	1.40325e+08	1.31481e+08	1.13968e+08	7	8	8	7	9	9	7	8	8
D4A742	2	2	144.09	0.746006	1.03628	Exercise	Control	Protein Romo1 OS=Rattus norvegicus GN=Romo1 PE=4 SV=1	5.43406e+06	5.6017e+06	6.04528e+06	4.22111e+06	5.68143e+06	5.94853e+06	4.7912e+06	5.97775e+06	3.86788e+06	7.35794e+06	6.20616e+06	4.963e+06	5.94957e+06	5.50435e+06	6.22525e+06	5.21235e+06	5.99095e+06	4.91675e+06	5.02845e+06	3.75689e+06	4.89632e+06	4.46897e+06	4.83146e+06	4.90338e+06	3.21496e+06	6.34824e+06	5.31198e+06	5.42679e+06	5.94957e+06	6.56347e+06	6.37583e+06	5.07233e+06	1	2	1	2	1	2	1	1	2
Q6UPE1	27	26	1896.19	0.747076	1.01827	Exercise	Control	Electron transfer flavoprotein-ubiquinone oxidoreductase, mitochondrial OS=Rattus norvegicus GN=Etfdh PE=2 SV=1	1.94315e+08	1.75547e+08	1.78199e+08	1.61929e+08	1.86318e+08	1.98483e+08	1.93188e+08	2.08882e+08	1.58643e+08	2.07046e+08	1.86699e+08	1.77625e+08	1.71605e+08	2.07776e+08	2.18059e+08	1.96755e+08	2.14229e+08	1.54082e+08	1.48225e+08	1.44121e+08	1.60571e+08	1.49115e+08	1.94811e+08	1.7134e+08	1.31863e+08	1.78634e+08	1.598e+08	1.94224e+08	1.71605e+08	2.47755e+08	2.23333e+08	1.9147e+08	24	23	20	19	21	21	21	18	22
Q5XIN6	12	12	739.26	0.74802	1.01559	Control	Exercise	LETM1 and EF-hand domain-containing protein 1, mitochondrial OS=Rattus norvegicus GN=Letm1 PE=1 SV=1	1.26234e+07	1.22325e+07	1.08123e+07	9.34455e+06	9.98854e+06	1.19528e+07	1.14274e+07	1.18357e+07	9.16438e+06	1.51226e+07	1.0786e+07	1.09381e+07	1.01816e+07	1.20507e+07	1.04431e+07	1.01454e+07	1.39171e+07	1.07368e+07	8.99361e+06	8.31687e+06	8.60824e+06	8.97984e+06	1.15234e+07	9.70847e+06	7.61738e+06	1.30474e+07	9.23201e+06	1.19602e+07	1.01816e+07	1.43695e+07	1.06957e+07	9.87283e+06	9	7	9	6	6	7	8	8	8
Q63704;P32198;Q9Z2G4;Q9Z2G5	26	26	1938.5	0.748995	1.0175	Exercise	Control	Carnitine O-palmitoyltransferase 1, muscle isoform OS=Rattus norvegicus GN=Cpt1b PE=1 SV=1	1.2911e+08	1.25374e+08	1.15081e+08	9.952e+07	1.07685e+08	1.46544e+08	1.22897e+08	1.36534e+08	1.23615e+08	1.49149e+08	1.11808e+08	1.10435e+08	1.26692e+08	1.40192e+08	1.24002e+08	1.14053e+08	1.42341e+08	1.10044e+08	9.57238e+07	8.85752e+07	9.28044e+07	1.10095e+08	1.2393e+08	1.11995e+08	1.02748e+08	1.28682e+08	9.56991e+07	1.20755e+08	1.26692e+08	1.67167e+08	1.27002e+08	1.10989e+08	30	29	28	23	26	28	29	25	29
G3V6P2;F1M530;Q01205	12	12	1082.29	0.752105	1.01935	Exercise	Control	Dihydrolipoamide S-succinyltransferase (E2 component of 2-oxo-glutarate complex), isoform CRA_a OS=Rattus norvegicus GN=Dlst PE=3 SV=1	1.47167e+08	1.44619e+08	1.42459e+08	1.29966e+08	1.42392e+08	2.00448e+08	1.63072e+08	1.74592e+08	1.27092e+08	1.72546e+08	1.60762e+08	1.50121e+08	1.55626e+08	1.55531e+08	1.96042e+08	1.51079e+08	1.62249e+08	1.26936e+08	1.18497e+08	1.15673e+08	1.22715e+08	1.50591e+08	1.64442e+08	1.43213e+08	1.05638e+08	1.48868e+08	1.37599e+08	1.6415e+08	1.55626e+08	1.85457e+08	2.00784e+08	1.4702e+08	17	16	16	15	14	18	16	18	15
Q497B0	7	7	399.83	0.758819	1.04059	Exercise	Control	Omega-amidase NIT2 OS=Rattus norvegicus GN=Nit2 PE=1 SV=1	4.28204e+06	3.52925e+06	4.03004e+06	3.92188e+06	3.20125e+06	4.02248e+06	3.80215e+06	3.43242e+06	4.29223e+06	4.71084e+06	4.59064e+06	2.94681e+06	2.74528e+06	4.00819e+06	4.58588e+06	3.5684e+06	4.72087e+06	3.09771e+06	3.35217e+06	3.49057e+06	2.75888e+06	3.02198e+06	3.83409e+06	2.81552e+06	3.56768e+06	4.06439e+06	3.92923e+06	3.22219e+06	2.74528e+06	4.77942e+06	4.69681e+06	3.47254e+06	2	3	4	3	2	3	2	5	4
F1LX07	14	11	1077.78	0.758953	1.02088	Exercise	Control	Protein LOC100360985 (Fragment) OS=Rattus norvegicus GN=LOC100360985 PE=3 SV=1	1.45086e+08	1.30647e+08	1.15728e+08	8.12858e+07	1.1053e+08	1.10352e+08	1.21671e+08	1.0036e+08	1.36645e+08	1.377e+08	1.08194e+08	1.0047e+08	1.1056e+08	1.28751e+08	1.18676e+08	9.3784e+07	1.59955e+08	1.14672e+08	9.62619e+07	7.23462e+07	9.52559e+07	8.29043e+07	1.22693e+08	8.23227e+07	1.13578e+08	1.18804e+08	9.26052e+07	1.09859e+08	1.1056e+08	1.53524e+08	1.21546e+08	9.12646e+07	15	14	14	11	11	11	13	11	15
D3ZK49;F1M4U2	4	4	288.9	0.759175	1.0716	Control	Exercise	Single-stranded DNA binding protein 1, isoform CRA_a OS=Rattus norvegicus GN=Ssbp1 PE=4 SV=1	2.47341e+06	3.49478e+06	2.14398e+06	1.82433e+06	4.70482e+06	3.51894e+06	3.38783e+06	3.16693e+06	2.48861e+06	3.31828e+06	2.63355e+06	3.08886e+06	2.98472e+06	2.86289e+06	3.42584e+06	2.26098e+06	2.72689e+06	3.06746e+06	1.78336e+06	1.6237e+06	4.05467e+06	2.64369e+06	3.4163e+06	2.59775e+06	2.06851e+06	2.86292e+06	2.25411e+06	3.37752e+06	2.98472e+06	3.41376e+06	3.50871e+06	2.20024e+06	4	4	2	3	2	4	2	3	3
F1M2C0	1	1	36.86	0.761214	1.14624	Control	Exercise	Protein Tmprss13 (Fragment) OS=Rattus norvegicus GN=Tmprss13 PE=3 SV=1	95618.3	75416.8	79662.1	97443	3162.63	58892.7	67225.5	46217.1	82168.1	33539.4	64297.9	56822.3	61645.6	50958.2	47007.1	60393	105417	66195.2	66262.8	86726.5	2725.59	44244.6	67790.3	37910.6	68297.7	28936.9	55034	62132.3	61645.6	60763.4	48144.1	58770.6	1	0	1	0	1	0	0	0	1
F8WFT3	1	1	40.14	0.761293	1.0053	Exercise	Control	NADPH:adrenodoxin oxidoreductase, mitochondrial OS=Rattus norvegicus GN=Fdxr PE=3 SV=1	29687.9	49160.3	31335.4	28763.3	20518.3	18250.6	56755.3	36085.1	24360.7	47105.7	31824.1	26067.3	31096.2	32000.2	41651.9	37884.2	32730.4	43149.2	26064.7	25600	17682.9	13711.2	57232.2	29599.6	20248.5	40641.5	27238.9	28503.3	31096.2	38157.6	42659.4	36866.5	0	0	0	0	0	0	0	0	0
P19804;D3ZGV9;Q05982	4	4	253.36	0.761306	1.04616	Control	Exercise	Nucleoside diphosphate kinase B OS=Rattus norvegicus GN=Nme2 PE=1 SV=1	3.97661e+06	3.93507e+06	3.29973e+06	3.53429e+06	3.5287e+06	2.17588e+06	3.72075e+06	2.3331e+06	3.67004e+06	3.54484e+06	2.98294e+06	3.30892e+06	2.79295e+06	3.29715e+06	2.73863e+06	2.99925e+06	4.38414e+06	3.45391e+06	2.74471e+06	3.1456e+06	3.04107e+06	1.63468e+06	3.75202e+06	1.91377e+06	3.05052e+06	3.0584e+06	2.55316e+06	3.61814e+06	2.79295e+06	3.93157e+06	2.80487e+06	2.91868e+06	2	2	0	0	0	1	2	1	4
F1LM47	20	20	1266.38	0.76349	1.01493	Control	Exercise	Protein Sucla2 OS=Rattus norvegicus GN=Sucla2 PE=3 SV=1	1.55941e+08	1.68921e+08	1.35585e+08	1.3352e+08	1.29775e+08	1.60907e+08	1.39101e+08	1.49752e+08	1.29434e+08	1.67648e+08	1.36265e+08	1.36621e+08	1.33545e+08	1.60167e+08	1.51716e+08	1.40846e+08	1.71922e+08	1.48266e+08	1.12779e+08	1.18836e+08	1.11842e+08	1.20886e+08	1.40269e+08	1.22837e+08	1.07585e+08	1.44642e+08	1.16632e+08	1.49388e+08	1.33545e+08	1.90986e+08	1.55386e+08	1.37062e+08	16	21	13	15	16	11	14	16	15
D3ZNB4	1	1	43.76	0.768134	1.02835	Control	Exercise	PDZ and LIM domain 7, isoform CRA_f OS=Rattus norvegicus GN=Pdlim7 PE=4 SV=1	118678	263291	198023	259985	147160	21954.4	130842	17583.1	340147	57209.8	51542.3	179583	141900	146704	63540.4	144980	130841	231097	164715	231393	126824	16493.8	131941	14422.9	282728	49359.1	44116.1	196365	141900	174933	65077.4	141085	0	0	0	0	0	0	0	0	1
P18418	3	3	182.74	0.768247	1.03757	Control	Exercise	Calreticulin OS=Rattus norvegicus GN=Calr PE=1 SV=1	1.56725e+06	1.46663e+06	1.44099e+06	1.91575e+06	1.69054e+06	1.3902e+06	1.93969e+06	1.02937e+06	1.37042e+06	1.66618e+06	1.71705e+06	1.58123e+06	1.51679e+06	1.49165e+06	1.27939e+06	1.36731e+06	1.72786e+06	1.2873e+06	1.19862e+06	1.70506e+06	1.45693e+06	1.04442e+06	1.95599e+06	844362	1.13908e+06	1.43753e+06	1.46966e+06	1.72899e+06	1.51679e+06	1.77867e+06	1.31034e+06	1.33058e+06	0	0	0	2	2	1	1	0	1
P62074	2	2	101.03	0.771274	1.01942	Exercise	Control	Mitochondrial import inner membrane translocase subunit Tim10 OS=Rattus norvegicus GN=Timm10 PE=2 SV=1	1.42041e+06	1.11949e+06	1.30689e+06	1.25303e+06	1.52649e+06	1.39081e+06	1.16072e+06	1.19485e+06	1.11631e+06	1.66725e+06	1.41743e+06	1.25276e+06	1.32877e+06	1.37068e+06	1.16438e+06	1.25653e+06	1.56598e+06	982605	1.08707e+06	1.11522e+06	1.31555e+06	1.04488e+06	1.17047e+06	980099	927871	1.43846e+06	1.21321e+06	1.36983e+06	1.32877e+06	1.63442e+06	1.19254e+06	1.22278e+06	2	2	0	1	1	1	1	0	2
F1LQH0	3	3	172.47	0.771598	1.01394	Control	Exercise	Dystrophin (Fragment) OS=Rattus norvegicus GN=Dmd PE=4 SV=1	692008	457018	606485	669742	610196	750725	776975	661741	1.02605e+06	501706	575426	598258	463760	732624	582960	672253	762926	401136	504473	596086	525874	564000	783503	542808	852845	432859	492520	654165	463760	873592	597061	654194	1	1	2	1	1	1	3	2	3
D3ZSP5;P38652	4	4	185.68	0.772001	1.25466	Control	Exercise	Phosphoglucomutase-1 OS=Rattus norvegicus GN=Pgm1 PE=3 SV=1	763324	859934	886161	695575	777872	108586	536913	112385	842643	168294	292512	768980	393525	482236	235580	594756	841551	754786	737106	619078	670379	81578.1	541424	92186.4	700400	145199	250367	840842	393525	575026	241278	578778	2	2	1	1	2	0	1	0	2
P11980;B1WBN9;D3ZH85;F1M2F6;F1MAC8	11	11	695.03	0.773446	1.16627	Control	Exercise	Pyruvate kinase isozymes M1/M2 OS=Rattus norvegicus GN=Pkm2 PE=1 SV=3	6.1447e+06	5.19829e+06	6.67975e+06	4.60499e+06	6.09336e+06	1.46576e+06	3.77276e+06	1.52761e+06	6.32377e+06	2.18621e+06	2.79525e+06	5.31299e+06	2.93495e+06	3.56283e+06	3.12954e+06	4.18235e+06	6.77442e+06	4.56267e+06	5.5562e+06	4.09855e+06	5.25132e+06	1.10119e+06	3.80446e+06	1.25306e+06	5.25628e+06	1.8862e+06	2.39252e+06	5.80948e+06	2.93495e+06	4.24837e+06	3.20524e+06	4.07e+06	8	7	7	7	8	1	7	1	7
D3ZFS8;F1LPM4	9	9	442.11	0.773567	1.01657	Exercise	Control	Amine oxidase [flavin-containing] A OS=Rattus norvegicus GN=Maoa PE=4 SV=1	1.13452e+07	1.2232e+07	1.00999e+07	8.96277e+06	1.00405e+07	1.14309e+07	1.15298e+07	1.22707e+07	1.04674e+07	1.28782e+07	1.09313e+07	9.24538e+06	1.00636e+07	1.19322e+07	1.23733e+07	1.14773e+07	1.25079e+07	1.07363e+07	8.40108e+06	7.97708e+06	8.65302e+06	8.5877e+06	1.16266e+07	1.00653e+07	8.7004e+06	1.11109e+07	9.35632e+06	1.01094e+07	1.00636e+07	1.42282e+07	1.26726e+07	1.1169e+07	3	8	5	4	2	3	4	6	5
Q5I0P2	3	3	184.97	0.777036	1.01611	Control	Exercise	Glycine cleavage system H protein, mitochondrial OS=Rattus norvegicus GN=Gcsh PE=2 SV=1	2.24398e+07	2.12187e+07	2.1006e+07	1.57716e+07	1.83045e+07	2.22525e+07	2.06251e+07	2.05931e+07	1.97189e+07	2.54365e+07	1.99487e+07	1.92758e+07	1.56913e+07	2.09939e+07	2.00003e+07	1.85736e+07	2.47394e+07	1.86242e+07	1.74728e+07	1.40371e+07	1.57751e+07	1.67177e+07	2.07983e+07	1.68919e+07	1.63902e+07	2.19459e+07	1.70745e+07	2.10771e+07	1.56913e+07	2.50335e+07	2.04841e+07	1.80746e+07	2	0	2	3	3	1	2	4	1
F2Z3S8	5	5	370.14	0.77778	1.18783	Control	Exercise	Protein Tnnc2 (Fragment) OS=Rattus norvegicus GN=Tnnc2 PE=4 SV=1	9.48284e+06	8.70799e+06	8.87412e+06	7.25394e+06	8.55472e+06	1.86101e+06	6.05243e+06	2.41504e+06	8.55229e+06	3.76778e+06	3.41788e+06	6.63265e+06	5.40236e+06	6.50974e+06	4.50406e+06	6.00244e+06	1.04547e+07	7.64322e+06	7.38147e+06	6.45618e+06	7.37256e+06	1.39813e+06	6.10328e+06	1.98099e+06	7.10861e+06	3.25074e+06	2.92544e+06	7.25247e+06	5.40236e+06	7.76232e+06	4.61301e+06	5.84119e+06	3	3	3	3	4	1	1	1	2
P35281;B0BMW0;D3Z848;D3ZGA3	4	4	200.44	0.779343	1.01405	Exercise	Control	Ras-related protein Rab-10 OS=Rattus norvegicus GN=Rab10 PE=2 SV=1	2.3371e+06	1.86825e+06	1.59953e+06	1.85613e+06	1.77438e+06	1.85246e+06	1.70063e+06	2.41506e+06	1.91936e+06	1.86199e+06	1.82782e+06	1.69042e+06	1.77126e+06	2.25907e+06	2.26849e+06	2.02153e+06	2.57661e+06	1.63981e+06	1.33048e+06	1.652e+06	1.52918e+06	1.3917e+06	1.71492e+06	1.981e+06	1.59536e+06	1.60647e+06	1.56447e+06	1.84839e+06	1.77126e+06	2.69375e+06	2.32336e+06	1.96722e+06	2	1	1	1	1	1	1	2	1
F1LPY7;D3ZNL5	6	6	323.62	0.779561	1.02569	Exercise	Control	Trans-2-enoyl-CoA reductase, mitochondrial OS=Rattus norvegicus GN=Mecr PE=4 SV=1	3.43741e+06	4.13719e+06	3.25969e+06	2.31192e+06	1.99504e+06	2.81768e+06	3.59617e+06	3.46682e+06	2.30141e+06	3.71234e+06	2.71685e+06	2.59099e+06	3.82186e+06	3.37973e+06	4.06452e+06	3.07704e+06	3.78968e+06	3.63131e+06	2.7114e+06	2.05767e+06	1.71934e+06	2.11685e+06	3.62638e+06	2.84373e+06	1.91292e+06	3.20291e+06	2.32541e+06	2.83312e+06	3.82186e+06	4.03004e+06	4.16283e+06	2.99438e+06	3	3	2	2	2	2	4	3	1
Q63362	8	8	761.44	0.77968	1.01675	Exercise	Control	NADH dehydrogenase [ubiquinone] 1 alpha subcomplex subunit 5 OS=Rattus norvegicus GN=Ndufa5 PE=1 SV=3	1.36149e+08	1.46167e+08	1.28202e+08	1.19276e+08	1.40857e+08	1.71164e+08	1.29276e+08	1.57233e+08	1.28627e+08	1.48735e+08	1.25473e+08	1.23066e+08	1.40409e+08	1.53503e+08	1.68972e+08	1.58442e+08	1.50102e+08	1.28295e+08	1.06638e+08	1.06158e+08	1.21392e+08	1.28591e+08	1.30362e+08	1.28974e+08	1.06914e+08	1.28325e+08	1.07395e+08	1.34566e+08	1.40409e+08	1.83039e+08	1.73059e+08	1.54186e+08	13	16	11	9	8	13	11	10	12
B0BNJ4	5	5	290.29	0.780607	1.01784	Exercise	Control	Ethylmalonic encephalopathy 1 OS=Rattus norvegicus GN=Ethe1 PE=2 SV=1	6.78294e+06	6.58766e+06	7.07743e+06	6.37317e+06	6.61224e+06	6.5937e+06	7.30898e+06	5.8205e+06	6.47318e+06	7.51015e+06	8.43961e+06	5.80341e+06	6.2635e+06	6.61278e+06	6.60526e+06	6.39698e+06	7.47807e+06	5.78215e+06	5.88699e+06	5.67227e+06	5.6985e+06	4.95367e+06	7.37039e+06	4.77439e+06	5.38047e+06	6.47956e+06	7.22364e+06	6.34574e+06	6.2635e+06	7.88518e+06	6.76503e+06	6.22513e+06	4	2	3	2	2	2	4	1	4
Q6AXT0	1	1	89.61	0.780834	1.01988	Exercise	Control	39S ribosomal protein L37, mitochondrial OS=Rattus norvegicus GN=Mrpl37 PE=2 SV=1	496293	262176	405556	332287	311639	320354	331673	489704	330687	458143	463041	354152	357927	405204	268067	371105	547153	230118	337340	295743	268574	240674	334460	401691	274865	395273	396327	387248	357927	483172	274551	361136	0	0	0	0	1	0	0	0	0
P62076	2	2	152.28	0.781795	1.06697	Control	Exercise	Mitochondrial import inner membrane translocase subunit Tim13 OS=Rattus norvegicus GN=Timm13 PE=2 SV=1	2.94049e+06	4.57701e+06	2.28004e+06	2.09257e+06	2.26047e+06	3.98005e+06	3.04918e+06	4.15908e+06	2.41983e+06	3.22904e+06	2.68179e+06	2.633e+06	3.01426e+06	3.86837e+06	2.86937e+06	3.03271e+06	3.24183e+06	4.01735e+06	1.89653e+06	1.86244e+06	1.9481e+06	2.9901e+06	3.07479e+06	3.41157e+06	2.01135e+06	2.78593e+06	2.2954e+06	2.87905e+06	3.01426e+06	4.6127e+06	2.93878e+06	2.95124e+06	2	2	2	2	2	2	2	2	2
Q5I0K3;F1M6R1	8	8	438.57	0.782465	1.12362	Control	Exercise	Citrate lyase subunit beta-like protein, mitochondrial OS=Rattus norvegicus GN=Clybl PE=2 SV=2	3.06291e+06	3.72968e+06	2.63071e+06	2.68359e+06	2.31426e+06	3.65691e+06	2.7855e+06	9.84986e+06	2.22035e+06	5.64034e+06	2.71304e+06	2.28762e+06	3.26252e+06	3.08476e+06	5.22767e+06	2.89802e+06	3.37681e+06	3.27363e+06	2.18822e+06	2.38845e+06	1.99446e+06	2.74734e+06	2.8089e+06	8.07956e+06	1.84554e+06	4.86634e+06	2.32215e+06	2.5014e+06	3.26252e+06	3.67832e+06	5.35412e+06	2.82017e+06	2	3	1	2	0	4	3	6	0
D3ZGM1	1	1	43.34	0.782765	1.05064	Control	Exercise	Protein Ptcd3 OS=Rattus norvegicus GN=Ptcd3 PE=4 SV=1	114859	53054.8	60950.1	83517.2	96466.6	107871	81511.3	90942.2	104431	87180.7	74020.7	72195.7	86846.8	92668.4	63560.5	75047.4	126630	46567.5	50698.1	74332.2	83136.1	81040.3	82196.1	74597.3	86802.4	75217.2	63355.9	78942.3	86846.8	110499	65097.9	73031.3	0	0	1	1	0	0	1	1	1
Q7TP77	1	1	77.69	0.783419	1.04337	Exercise	Control	Aa2-277 OS=Rattus norvegicus GN=Mrpl49 PE=2 SV=1	332664	272276	372738	174311	202955	286251	281672	215698	213319	374408	370374	211948	330200	206018	205925	319120	366756	238983	310043	155141	174909	215053	284038	176931	177310	323029	317011	231754	330200	245660	210906	310547	0	1	0	0	1	1	0	0	0
B2RYW9	7	7	352.36	0.786173	1.0206	Control	Exercise	Fumarylacetoacetate hydrolase domain-containing protein 2 OS=Rattus norvegicus GN=Fahd2 PE=1 SV=1	1.43504e+07	1.65148e+07	1.3391e+07	1.37753e+07	1.08733e+07	1.55592e+07	1.13175e+07	1.2458e+07	1.06068e+07	1.4558e+07	1.29298e+07	1.22893e+07	1.10937e+07	1.3669e+07	1.54887e+07	1.54194e+07	1.5821e+07	1.44955e+07	1.11386e+07	1.22603e+07	9.3707e+06	1.16892e+07	1.14126e+07	1.02189e+07	8.81632e+06	1.25603e+07	1.10669e+07	1.34377e+07	1.10937e+07	1.62992e+07	1.58633e+07	1.50052e+07	5	5	5	4	5	7	5	5	5
P18163;D3ZW20	38	35	2684.32	0.789708	1.01601	Control	Exercise	Long-chain-fatty-acid--CoA ligase 1 OS=Rattus norvegicus GN=Acsl1 PE=1 SV=1	3.45111e+08	3.34382e+08	2.95887e+08	2.79667e+08	2.93389e+08	3.80665e+08	3.53358e+08	3.65287e+08	3.00916e+08	3.90944e+08	3.1194e+08	2.9032e+08	3.11502e+08	3.29061e+08	3.38582e+08	3.32759e+08	3.80478e+08	2.93495e+08	2.46118e+08	2.4891e+08	2.52846e+08	2.85983e+08	3.56327e+08	2.99635e+08	2.50119e+08	3.37296e+08	2.66996e+08	3.1745e+08	3.11502e+08	3.92378e+08	3.46772e+08	3.2382e+08	32	33	28	31	27	29	35	29	28
B0K020	5	5	390.96	0.789943	1.01827	Exercise	Control	CDGSH iron-sulfur domain-containing protein 1 OS=Rattus norvegicus GN=Cisd1 PE=3 SV=1	8.496e+07	7.13019e+07	8.61791e+07	8.3468e+07	9.12287e+07	8.25906e+07	7.65989e+07	7.482e+07	8.14597e+07	1.05963e+08	8.93651e+07	7.24076e+07	7.92387e+07	8.20244e+07	8.01251e+07	7.24615e+07	9.36669e+07	6.25834e+07	7.16835e+07	7.42885e+07	7.86219e+07	6.20481e+07	7.72425e+07	6.13728e+07	6.77088e+07	9.14224e+07	7.64895e+07	7.91741e+07	7.92387e+07	9.78072e+07	8.20632e+07	7.05149e+07	6	5	6	6	6	6	5	4	5
Q8SEZ0;P11661	7	7	618.43	0.79077	1.01143	Exercise	Control	NADH-ubiquinone oxidoreductase chain 5 OS=Rattus norvegicus GN=Mt-nd5 PE=2 SV=1	7.81659e+07	7.43042e+07	7.48288e+07	6.71684e+07	7.57459e+07	7.77504e+07	6.67142e+07	8.90516e+07	7.96781e+07	7.75216e+07	7.57441e+07	7.28243e+07	6.41366e+07	7.47396e+07	8.56031e+07	8.03844e+07	8.61765e+07	6.52186e+07	6.22424e+07	5.97814e+07	6.52787e+07	5.84118e+07	6.72747e+07	7.30466e+07	6.62279e+07	6.68836e+07	6.4831e+07	7.96297e+07	6.41366e+07	8.91206e+07	8.76737e+07	7.8225e+07	8	5	7	5	7	8	7	7	5
Q6P725;G3V8C3	2	2	108.72	0.791377	1.02949	Exercise	Control	Desmin OS=Rattus norvegicus GN=Des PE=2 SV=1	258034	335398	382332	280371	427897	153274	225858	182401	262366	233487	256038	408187	286938	255216	175101	434463	284478	294387	318023	249537	368767	115151	227756	149618	218077	201447	219148	446332	286938	304324	179337	422792	2	1	1	0	1	0	0	0	1
Q6AXX6	1	1	47.77	0.791385	1.03327	Exercise	Control	Redox-regulatory protein FAM213A OS=Rattus norvegicus GN=Fam213a PE=1 SV=1	273314	453690	417473	505569	526682	407862	411941	408139	422128	419511	674906	383535	374714	449114	329077	464960	301324	398215	347253	449969	453901	306416	415402	334785	350870	361943	577666	419376	374714	535530	337037	452469	0	0	0	0	0	0	0	0	0
D4A5L9;D3ZS15;P10715	12	12	883.32	0.793802	1.08593	Control	Exercise	Protein LOC679794 OS=Rattus norvegicus GN=LOC690675 PE=3 SV=1	3.23218e+08	2.6749e+08	1.37754e+08	1.36628e+08	1.55455e+08	1.69603e+08	1.34962e+08	1.10156e+08	1.63121e+08	2.07448e+08	1.30254e+08	1.69748e+08	1.44994e+08	2.19686e+08	1.07105e+08	1.79339e+08	3.56342e+08	2.34782e+08	1.14583e+08	1.21602e+08	1.33973e+08	1.27418e+08	1.36095e+08	9.03579e+07	1.35585e+08	1.7898e+08	1.11487e+08	1.85611e+08	1.44994e+08	2.61957e+08	1.09695e+08	1.74521e+08	18	17	11	11	11	10	9	7	11
G3V7J0	23	23	1806.5	0.797408	1.01825	Exercise	Control	Aldehyde dehydrogenase family 6, subfamily A1, isoform CRA_b OS=Rattus norvegicus GN=Aldh6a1 PE=3 SV=1	1.17322e+08	1.37922e+08	9.67488e+07	1.03659e+08	1.07565e+08	1.56542e+08	1.20104e+08	1.55262e+08	9.60589e+07	1.34733e+08	1.25965e+08	1.28492e+08	1.49968e+08	1.42519e+08	1.3407e+08	1.01484e+08	1.29346e+08	1.21058e+08	8.04754e+07	9.22589e+07	9.27009e+07	1.17606e+08	1.21113e+08	1.27357e+08	7.98436e+07	1.16244e+08	1.07816e+08	1.405e+08	1.49968e+08	1.69942e+08	1.37313e+08	9.8758e+07	22	24	17	19	19	24	23	25	18
Q91ZW6	1	1	62.19	0.797799	1.03889	Exercise	Control	Trimethyllysine dioxygenase, mitochondrial OS=Rattus norvegicus GN=Tmlhe PE=1 SV=2	161331	63927.5	116799	78486.2	66803.5	303694	58457.8	50753.4	304708	52070.9	37281.6	102282	148339	112669	162993	14915.8	177864	56110.8	97153.5	69854.6	57572	228158	58948.9	41631.6	253271	44925.4	31910.1	111841	148339	134348	166936	14515.1	0	0	0	0	0	1	0	0	0
Q5XHZ0	8	8	533.88	0.798143	1.02745	Control	Exercise	Heat shock protein 75 kDa, mitochondrial OS=Rattus norvegicus GN=Trap1 PE=1 SV=1	2.82945e+06	3.62834e+06	3.16768e+06	2.67354e+06	2.69649e+06	4.73771e+06	3.75886e+06	4.39741e+06	2.24066e+06	4.70553e+06	3.62917e+06	2.7064e+06	3.07356e+06	4.18738e+06	3.52039e+06	3.08115e+06	3.11942e+06	3.18469e+06	2.63486e+06	2.37951e+06	2.32387e+06	3.55931e+06	3.79044e+06	3.60707e+06	1.86242e+06	4.05981e+06	3.10628e+06	2.95931e+06	3.07356e+06	4.9931e+06	3.60554e+06	2.99838e+06	2	3	1	3	3	7	3	4	1
D4A197	2	2	98.17	0.798896	1.01663	Control	Exercise	Methylmalonyl CoA epimerase (Predicted), isoform CRA_d OS=Rattus norvegicus GN=Mcee PE=4 SV=1	5.19741e+06	7.24187e+06	4.59224e+06	4.63736e+06	7.08132e+06	7.01954e+06	5.32473e+06	5.52466e+06	4.1514e+06	7.75127e+06	5.95711e+06	3.91372e+06	4.90765e+06	7.29462e+06	5.05978e+06	6.82096e+06	5.73005e+06	6.35637e+06	3.81981e+06	4.12736e+06	6.10277e+06	5.2736e+06	5.36946e+06	4.53172e+06	3.45061e+06	6.68759e+06	5.09882e+06	4.27946e+06	4.90765e+06	8.69822e+06	5.18217e+06	6.63772e+06	1	2	1	0	2	1	2	1	2
F1M5J5	1	1	45.44	0.802756	1.16232	Control	Exercise	Troponin I, fast skeletal muscle (Fragment) OS=Rattus norvegicus GN=Tnni2 PE=4 SV=1	886564	666048	760101	817969	450541	137656	426504	121044	1.11204e+06	195856	267198	628717	418129	386498	226761	435418	977420	584607	632250	728012	388281	103418	430088	99288.9	924322	168979	228701	687470	418129	460866	232246	423721	0	0	0	0	0	0	1	0	0
D3ZPZ2	2	1	100.77	0.805395	1.03372	Exercise	Control	Guanine nucleotide-binding protein G(olf) subunit alpha OS=Rattus norvegicus GN=Gnal PE=4 SV=1	717695	643632	703728	578391	1.03516e+06	1.25798e+06	530107	695472	706959	1.2287e+06	1.11347e+06	817167	611555	605372	592252	694496	791245	564932	585359	514781	892115	945084	534561	570476	587620	1.06009e+06	953045	893531	611555	721855	606578	675839	1	1	1	1	1	1	1	1	1
P21913	15	15	1181.43	0.808532	1.05709	Control	Exercise	Succinate dehydrogenase [ubiquinone] iron-sulfur subunit, mitochondrial OS=Rattus norvegicus GN=Sdhb PE=2 SV=2	2.18679e+08	1.55211e+08	1.55974e+08	9.27731e+07	8.37519e+07	1.06938e+08	8.55591e+07	1.10555e+08	1.86478e+08	1.71508e+08	1.03144e+08	8.52998e+07	1.0046e+08	1.02354e+08	1.08661e+08	9.70155e+07	2.4109e+08	1.36232e+08	1.29739e+08	8.25702e+07	7.21784e+07	8.034e+07	8.6278e+07	9.06852e+07	1.55e+08	1.47973e+08	8.82835e+07	9.32711e+07	1.0046e+08	1.22049e+08	1.11289e+08	9.44093e+07	13	12	13	11	11	9	11	9	10
D4A131	1	1	47.71	0.811174	1.04668	Exercise	Control	Mitochondrial ribosomal protein L4 (Predicted), isoform CRA_b OS=Rattus norvegicus GN=Mrpl4 PE=3 SV=1	152187	170779	215216	102160	112854	186565	154579	137197	197790	207894	243419	107049	136390	126895	119874	149718	167783	149897	179016	90925.2	97258.9	140161	155877	112539	164401	179365	208347	117053	136390	151312	122774	145696	0	0	1	0	0	0	0	0	0
E9PTA1	2	2	93.38	0.812875	1.22951	Control	Exercise	Protein Tnnc1 OS=Rattus norvegicus GN=Tnnc1 PE=4 SV=1	703707	559456	689606	708230	591602	107039	536214	80932.5	645799	134614	273882	695681	317981	324943	257750	583801	775825	491048	573612	630342	509850	80415.4	540719	66386.7	536784	116141	234421	760693	317981	387467	263985	568118	1	0	0	0	0	0	0	0	1
D3ZA38	10	9	538.36	0.819119	1.07727	Control	Exercise	Myosin binding protein C, fast-type (Predicted) OS=Rattus norvegicus GN=Mybpc2 PE=4 SV=1	2.61304e+06	2.69882e+06	3.89156e+06	3.43941e+06	3.40466e+06	2.26619e+06	2.0388e+06	836181	3.9298e+06	1.19806e+06	2.60078e+06	2.87801e+06	1.93988e+06	1.70793e+06	2.21635e+06	3.19811e+06	2.88083e+06	2.36882e+06	3.23699e+06	3.06115e+06	2.93418e+06	1.70253e+06	2.05593e+06	685896	3.26642e+06	1.03365e+06	2.22606e+06	3.14696e+06	1.93988e+06	2.03656e+06	2.26996e+06	3.1122e+06	4	3	2	2	2	3	2	0	5
D4A7Y9	3	3	116.77	0.819619	1.03022	Exercise	Control	Protein LOC687237 OS=Rattus norvegicus GN=LOC687237 PE=4 SV=1	2.01625e+06	2.1042e+06	2.12179e+06	2.07054e+06	2.2972e+06	2.79407e+06	2.61143e+06	2.70643e+06	2.13043e+06	3.44362e+06	1.96237e+06	2.0674e+06	2.52101e+06	2.77697e+06	2.44407e+06	1.94171e+06	2.22288e+06	1.84691e+06	1.7649e+06	1.84283e+06	1.97975e+06	2.09911e+06	2.63337e+06	2.22001e+06	1.7708e+06	2.97106e+06	1.67963e+06	2.2606e+06	2.52101e+06	3.3113e+06	2.50319e+06	1.88955e+06	2	0	0	1	0	1	1	1	0
D3ZTC5	2	2	102.83	0.821513	1.0107	Control	Exercise	Myotilin (Predicted) OS=Rattus norvegicus GN=Myot PE=4 SV=1	1.20321e+06	1.18609e+06	1.35871e+06	1.56485e+06	2.19845e+06	540361	1.27641e+06	571881	1.28253e+06	826914	1.05891e+06	2.07225e+06	1.30484e+06	1.07781e+06	924364	1.24758e+06	1.32652e+06	1.04106e+06	1.13017e+06	1.39276e+06	1.89465e+06	405959	1.28713e+06	469098	1.06603e+06	713439	906340	2.2659e+06	1.30484e+06	1.2852e+06	946723	1.21407e+06	1	1	1	1	1	0	1	0	1
F1M8L6	2	2	69.95	0.822783	1.01928	Exercise	Control	Protein LOC684509 OS=Rattus norvegicus GN=Ndufa3 PE=4 SV=1	9.5804e+06	1.37336e+07	9.58045e+06	9.47903e+06	1.10872e+07	1.20495e+07	9.19178e+06	1.16834e+07	1.02779e+07	1.23408e+07	9.14503e+06	1.01131e+07	8.60509e+06	1.24883e+07	1.35011e+07	1.15796e+07	1.05622e+07	1.20543e+07	7.969e+06	8.43656e+06	9.55509e+06	9.05245e+06	9.269e+06	9.58358e+06	8.54292e+06	1.06473e+07	7.82743e+06	1.10582e+07	8.60509e+06	1.48913e+07	1.38276e+07	1.12686e+07	0	1	1	0	0	0	0	0	0
P16617;D4A9Z5;Q5XIV1	7	7	388.75	0.823358	1.13197	Control	Exercise	Phosphoglycerate kinase 1 OS=Rattus norvegicus GN=Pgk1 PE=1 SV=2	6.58206e+06	5.85421e+06	6.92777e+06	5.96863e+06	5.77744e+06	1.41996e+06	4.51971e+06	1.51757e+06	7.29352e+06	1.82916e+06	2.95883e+06	6.00636e+06	4.21353e+06	3.69006e+06	2.70466e+06	5.37499e+06	7.25661e+06	5.13838e+06	5.7625e+06	5.31222e+06	4.97906e+06	1.06678e+06	4.55768e+06	1.24482e+06	6.06233e+06	1.57815e+06	2.53253e+06	6.56766e+06	4.21353e+06	4.40009e+06	2.77008e+06	5.2306e+06	4	4	4	4	3	0	2	0	5
Q9WVK7	20	20	1245.86	0.823655	1.01387	Exercise	Control	Hydroxyacyl-coenzyme A dehydrogenase, mitochondrial OS=Rattus norvegicus GN=Hadh PE=2 SV=1	1.74824e+08	1.93189e+08	1.41945e+08	1.36257e+08	1.2112e+08	1.84916e+08	1.59309e+08	1.87548e+08	1.46078e+08	1.98527e+08	1.32765e+08	1.43528e+08	1.65378e+08	1.84492e+08	1.82802e+08	1.63557e+08	1.92741e+08	1.69567e+08	1.18069e+08	1.21272e+08	1.04383e+08	1.38922e+08	1.60647e+08	1.5384e+08	1.21419e+08	1.71284e+08	1.13637e+08	1.5694e+08	1.65378e+08	2.19991e+08	1.87224e+08	1.59163e+08	19	18	13	14	11	16	16	20	13
D3ZD09	7	7	539.63	0.823864	1.00604	Exercise	Control	Cytochrome c oxidase subunit 6B1 OS=Rattus norvegicus GN=LOC681754 PE=4 SV=1	5.34598e+08	5.168e+08	4.75309e+08	4.31508e+08	4.38488e+08	5.52516e+08	4.56797e+08	6.0304e+08	5.23776e+08	5.61164e+08	5.18775e+08	4.697e+08	5.07269e+08	4.99883e+08	4.73349e+08	4.79374e+08	5.89385e+08	4.53608e+08	3.95361e+08	3.84053e+08	3.77894e+08	4.15091e+08	4.60635e+08	4.94657e+08	4.3536e+08	4.84158e+08	4.4403e+08	5.13594e+08	5.07269e+08	5.96069e+08	4.84799e+08	4.66496e+08	18	16	17	19	17	18	18	20	17
B0BNI6	1	1	39.72	0.824155	1.01834	Control	Exercise	Protein Slc25a35 OS=Rattus norvegicus GN=Slc25a35 PE=2 SV=1	473498	315218	362001	255332	413888	376081	336223	377067	343571	443241	296596	333043	331160	467825	392005	249463	522023	276675	301111	227252	356693	282540	339048	309297	285574	382417	253863	364166	331160	557842	401486	242762	0	0	0	0	0	0	0	1	0
D4A5E5	1	1	53.56	0.825064	1.0152	Control	Exercise	Protein Sgcb OS=Rattus norvegicus GN=Sgcb PE=4 SV=1	181022	133922	202537	220960	260610	197000	217297	202781	266820	160335	192750	171845	159526	254064	147168	239427	199574	117547	168470	196660	224597	148001	219122	166335	221779	138333	164979	187903	159526	302950	150728	232995	1	0	1	0	0	0	0	0	0
Q63ZY8	1	1	167.84	0.827734	1.02889	Exercise	Control	Coiled-coil-helix-coiled-coil-helix domain containing 10 OS=Rattus norvegicus GN=Chchd10 PE=2 SV=1	8.1729e+06	9.69036e+06	8.65843e+06	6.20572e+06	6.79191e+06	7.33554e+06	7.44427e+06	9.49667e+06	9.68635e+06	1.16131e+07	6.82834e+06	7.04867e+06	7.50605e+06	7.23224e+06	9.21524e+06	6.50868e+06	9.01047e+06	8.50547e+06	7.20206e+06	5.52323e+06	5.85335e+06	5.511e+06	7.50681e+06	7.78986e+06	8.05124e+06	1.00195e+07	5.84452e+06	7.70736e+06	7.50605e+06	8.62384e+06	9.43814e+06	6.33383e+06	2	2	2	2	1	2	2	2	2
P20070	2	2	138	0.830373	1.04247	Exercise	Control	NADH-cytochrome b5 reductase 3 OS=Rattus norvegicus GN=Cyb5r3 PE=1 SV=2	818619	945187	841003	789506	832801	760330	749666	715423	971051	1.22588e+06	832654	931010	713405	805218	561630	685718	902513	829615	699544	702679	717717	571216	755965	586842	807132	1.05766e+06	712687	1.01801e+06	713405	960154	575215	667297	1	1	1	1	1	1	2	0	1
B0BNB9	1	1	52.6	0.833175	1.01603	Exercise	Control	HtrA serine peptidase 2 OS=Rattus norvegicus GN=Htra2 PE=2 SV=1	505094	769747	706537	329987	443813	477965	636380	608727	703933	800066	483056	412266	550291	535765	597450	467219	556857	675626	587695	293696	382484	359083	641727	499322	585104	690276	413458	450792	550291	638854	611901	454668	0	0	0	0	0	0	1	0	1
B1H283	1	1	35.55	0.834762	1.03621	Control	Exercise	Uncharacterized protein C1orf177 homolog OS=Rattus norvegicus PE=2 SV=1	447004	447134	320610	343897	308840	560308	472013	685393	289182	384096	500788	431318	377749	333279	599688	543816	492814	392461	266682	306077	266162	420945	475979	562209	240366	331388	428635	471625	377749	397407	614194	529207	0	0	0	0	0	1	0	0	0
Q5M9I5	4	4	394.63	0.835981	1.0398	Control	Exercise	Cytochrome b-c1 complex subunit 6, mitochondrial OS=Rattus norvegicus GN=Uqcrh PE=2 SV=1	1.28082e+08	1.86632e+08	1.71193e+08	1.42378e+08	1.46779e+08	2.92057e+08	1.84559e+08	2.56969e+08	1.16849e+08	2.05389e+08	1.95637e+08	1.23446e+08	1.60363e+08	2.11784e+08	2.25544e+08	2.11887e+08	1.41208e+08	1.63812e+08	1.42398e+08	1.2672e+08	1.26496e+08	2.19415e+08	1.86109e+08	2.10785e+08	9.71245e+07	1.77204e+08	1.6745e+08	1.34982e+08	1.60363e+08	2.52535e+08	2.31e+08	2.06195e+08	7	8	8	8	7	9	7	7	7
Q6PCU8	3	2	171.15	0.836687	1.03836	Exercise	Control	NADH dehydrogenase [ubiquinone] flavoprotein 3, mitochondrial OS=Rattus norvegicus GN=Ndufv3 PE=3 SV=1	1.0999e+07	1.14639e+07	7.85674e+06	1.17596e+07	9.50054e+06	1.04136e+07	1.20493e+07	1.27865e+07	9.66932e+06	9.67771e+06	8.32806e+06	8.91713e+06	1.07926e+07	1.48293e+07	1.64043e+07	1.15417e+07	1.21261e+07	1.00621e+07	6.53522e+06	1.04663e+07	8.18767e+06	7.82345e+06	1.21506e+07	1.04884e+07	8.03708e+06	8.34968e+06	7.12817e+06	9.75043e+06	1.07926e+07	1.76827e+07	1.68011e+07	1.12317e+07	2	1	1	2	2	2	2	2	2
G3V6D3	33	33	3632.4	0.837436	1.01142	Exercise	Control	ATP synthase subunit beta OS=Rattus norvegicus GN=Atp5b PE=3 SV=1	4.99646e+09	5.48663e+09	4.71312e+09	4.12107e+09	4.9558e+09	6.30248e+09	5.00493e+09	6.30192e+09	4.45234e+09	6.40511e+09	5.39682e+09	4.45061e+09	5.10579e+09	5.60296e+09	5.62525e+09	5.32187e+09	5.5085e+09	4.81576e+09	3.92036e+09	3.66785e+09	4.27096e+09	4.73489e+09	5.04698e+09	5.16929e+09	3.70075e+09	5.52616e+09	4.61925e+09	4.86652e+09	5.10579e+09	6.68105e+09	5.76132e+09	5.17891e+09	95	95	91	95	90	91	94	96	91
P97521;Q66HP8	14	14	757.83	0.837902	1.01359	Exercise	Control	Mitochondrial carnitine/acylcarnitine carrier protein OS=Rattus norvegicus GN=Slc25a20 PE=1 SV=1	4.87055e+07	5.16756e+07	4.59597e+07	4.01498e+07	4.35152e+07	5.46166e+07	4.74347e+07	5.39501e+07	4.44152e+07	6.11523e+07	4.60308e+07	4.36777e+07	4.44693e+07	4.70841e+07	4.90516e+07	5.53704e+07	5.36969e+07	4.53569e+07	3.82291e+07	3.57343e+07	3.75019e+07	4.1032e+07	4.78332e+07	4.42538e+07	3.69177e+07	5.27606e+07	3.93988e+07	4.77594e+07	4.44693e+07	5.61438e+07	5.02381e+07	5.38829e+07	15	11	10	10	9	9	13	9	10
G3V8S6	7	7	261.82	0.838892	1.00005	Exercise	Control	Histidine rich calcium binding protein, isoform CRA_b OS=Rattus norvegicus GN=Hrc PE=4 SV=1	1.39213e+06	1.30284e+06	1.17939e+06	2.43844e+06	1.17051e+06	1.13665e+06	1.52059e+06	941747	1.23893e+06	1.1101e+06	1.43226e+06	1.97816e+06	1.24336e+06	1.48403e+06	1.23459e+06	1.3614e+06	1.5348e+06	1.14354e+06	981010	2.17027e+06	1.00876e+06	853933	1.53337e+06	772489	1.02979e+06	957761	1.2259e+06	2.16302e+06	1.24336e+06	1.76958e+06	1.26445e+06	1.32483e+06	3	0	0	2	0	0	0	1	0
D3ZLW9	1	1	36.24	0.839607	1.08911	Control	Exercise	Protein Trnt1 OS=Rattus norvegicus GN=Trnt1 PE=3 SV=1	45730.5	106071	126638	93039	86459.7	148946	122413	188844	102326	119804	90258.3	91634.8	119984	131962	66227	120819	50417	93101	105337	82806.9	74511.9	111899	123441	154903	85052.4	103364	77254	100198	119984	157353	67828.9	117574	0	0	0	0	0	0	0	0	0
G3V8V3;B2GV03;D3ZEF4;P09812	5	5	246.37	0.841007	1.1057	Control	Exercise	Phosphorylase OS=Rattus norvegicus GN=Pygm PE=3 SV=1	3.26507e+06	2.68952e+06	2.35113e+06	2.02527e+06	2.65402e+06	298598	1.54893e+06	418065	3.37784e+06	878722	1.12327e+06	2.05591e+06	1.05003e+06	1.82602e+06	1.42704e+06	2.05393e+06	3.59968e+06	2.36065e+06	1.95566e+06	1.80254e+06	2.28726e+06	224329	1.56194e+06	342927	2.80764e+06	758138	961428	2.24803e+06	1.05003e+06	2.17738e+06	1.46156e+06	1.99875e+06	4	3	2	1	2	0	1	0	4
P15429;D3ZJT8;D3ZKP2;F1M9V3	15	8	1059.63	0.841704	1.12796	Control	Exercise	Beta-enolase OS=Rattus norvegicus GN=Eno3 PE=1 SV=3	1.13613e+07	9.4092e+06	1.16603e+07	9.17454e+06	1.15292e+07	2.58355e+06	8.11003e+06	2.90409e+06	1.13119e+07	3.64094e+06	4.70674e+06	1.04036e+07	6.04779e+06	8.26762e+06	5.78955e+06	8.99351e+06	1.25256e+07	8.25869e+06	9.69901e+06	8.16556e+06	9.93599e+06	1.94095e+06	8.17817e+06	2.38215e+06	9.40237e+06	3.14131e+06	4.0286e+06	1.13759e+07	6.04779e+06	9.85843e+06	5.92959e+06	8.75191e+06	6	5	3	4	3	0	4	0	6
Q5BJZ3;D3ZBZ4	43	42	3441.21	0.842309	1.01821	Control	Exercise	Nicotinamide nucleotide transhydrogenase OS=Rattus norvegicus GN=Nnt PE=2 SV=1	6.93902e+08	7.39717e+08	5.74229e+08	5.79159e+08	7.12973e+08	9.68579e+08	6.47926e+08	8.29794e+08	5.70966e+08	9.40623e+08	6.8371e+08	5.70967e+08	7.22732e+08	7.823e+08	7.71e+08	6.0121e+08	7.65014e+08	6.49268e+08	4.77642e+08	5.15465e+08	6.14448e+08	7.27667e+08	6.5337e+08	6.80657e+08	4.74583e+08	8.11545e+08	5.85203e+08	6.24324e+08	7.22732e+08	9.32827e+08	7.89649e+08	5.85059e+08	49	53	47	51	51	57	50	58	52
G8JLQ8	5	1	449.06	0.844331	1.13826	Control	Exercise	Enolase (Fragment) OS=Rattus norvegicus GN=Eno2 PE=3 SV=1	132961	122996	175070	115632	143871	12023.7	78611	20934.1	170789	41137.6	54360.2	114919	90746.5	72557.6	60901.3	99257	146587	107957	145623	102915	123990	9033.1	79271.4	17171.7	141959	35492.4	46528.1	125658	90746.5	86518.9	62374.4	96590.6	0	0	1	0	0	0	1	0	0
P16290;F1M1Y1;P25113	5	5	258.48	0.845406	1.1382	Control	Exercise	Phosphoglycerate mutase 2 OS=Rattus norvegicus GN=Pgam2 PE=2 SV=2	5.49521e+06	4.82821e+06	5.51015e+06	5.90324e+06	5.81291e+06	1.27338e+06	3.94616e+06	1.36925e+06	5.53352e+06	2.11679e+06	2.61655e+06	5.50402e+06	3.10037e+06	3.19986e+06	2.46944e+06	5.45299e+06	6.05837e+06	4.23784e+06	4.58333e+06	5.25403e+06	5.00964e+06	956657	3.97932e+06	1.12316e+06	4.59943e+06	1.82631e+06	2.23956e+06	6.01837e+06	3.10037e+06	3.81556e+06	2.52917e+06	5.3065e+06	3	4	3	2	1	0	2	0	5
D4AC52	1	1	38.25	0.846005	1.02804	Control	Exercise	Protein Ndufaf2 OS=Rattus norvegicus GN=Ndufaf2 PE=4 SV=1	182542	357540	198844	347206	206213	543781	314173	467357	178339	482372	342720	157414	217908	415030	501850	250635	201249	313822	165398	309021	177717	408528	316813	383360	148234	416178	293342	172125	217908	494888	513988	243902	0	0	0	0	0	0	0	1	0
D4A0G6	1	1	62.27	0.846114	1.03523	Exercise	Control	Protein Mrps28 OS=Rattus norvegicus GN=Mrps28 PE=4 SV=1	87638.5	60929	69052.6	63748.8	127541	153712	88940.9	143942	44402.6	131646	75729	85233.3	109138	149911	120707	106762	96619.9	53478.9	57437.8	56738	109916	115480	89688.2	118072	36907.1	113581	64818.1	93198.3	109138	178756	123627	103894	1	0	0	0	0	1	1	0	0
G3V9U2;F1LWF9	26	26	2622.41	0.848706	1.03777	Control	Exercise	3-ketoacyl-CoA thiolase, mitochondrial OS=Rattus norvegicus GN=Acaa2 PE=3 SV=1	5.35152e+08	7.79005e+08	3.57323e+08	6.44932e+08	4.92212e+08	8.37508e+08	8.33497e+08	9.04565e+08	3.29555e+08	7.60672e+08	5.12033e+08	6.39958e+08	6.14752e+08	8.59087e+08	7.93419e+08	6.78761e+08	5.89995e+08	6.83752e+08	2.9722e+08	5.74005e+08	4.24194e+08	6.29198e+08	8.405e+08	7.41989e+08	2.73924e+08	6.56288e+08	4.3826e+08	6.99762e+08	6.14752e+08	1.02439e+09	8.12611e+08	6.60527e+08	32	35	27	34	29	35	36	40	26
D3ZMH4	1	1	44.34	0.850012	1.23794	Control	Exercise	Uncharacterized protein OS=Rattus norvegicus PE=4 SV=1	1.16874e+06	845249	1.10003e+06	971934	1.19652e+06	138866	700870	195913	1.09596e+06	296027	429503	919899	661512	481618	465658	753576	1.28852e+06	741896	914999	865044	1.03117e+06	104326	706759	160702	910953	255405	367621	1.00586e+06	661512	574288	476922	733332	0	0	1	0	1	0	1	0	0
D4A830	6	6	389.65	0.85102	1.00645	Control	Exercise	Protein Ppa2 OS=Rattus norvegicus GN=Ppa2 PE=4 SV=1	1.21321e+07	1.27997e+07	1.03536e+07	9.21464e+06	1.06509e+07	1.36949e+07	1.17922e+07	1.22104e+07	1.05221e+07	1.67955e+07	1.14579e+07	9.23324e+06	1.09242e+07	1.1447e+07	1.22521e+07	9.62175e+06	1.33754e+07	1.12347e+07	8.61207e+06	8.20124e+06	9.17905e+06	1.02886e+07	1.18913e+07	1.00159e+07	8.74594e+06	1.44907e+07	9.80705e+06	1.00961e+07	1.09242e+07	1.36496e+07	1.25485e+07	9.36327e+06	4	4	3	3	4	4	5	5	3
Q68FT1	10	10	940.9	0.851887	1.00728	Control	Exercise	Ubiquinone biosynthesis protein COQ9, mitochondrial OS=Rattus norvegicus GN=Coq9 PE=2 SV=2	1.26676e+08	1.25001e+08	1.09581e+08	9.92393e+07	1.09227e+08	1.31533e+08	1.0677e+08	1.31491e+08	1.0234e+08	1.61038e+08	1.19272e+08	1.09642e+08	1.0625e+08	1.15904e+08	1.16238e+08	1.02042e+08	1.39658e+08	1.09716e+08	9.11493e+07	8.83253e+07	9.41329e+07	9.88172e+07	1.07667e+08	1.07858e+08	8.50646e+07	1.38939e+08	1.02087e+08	1.19888e+08	1.0625e+08	1.38205e+08	1.1905e+08	9.93009e+07	17	15	13	14	11	12	15	14	14
B6DYQ0	4	4	251.41	0.851896	1.04156	Control	Exercise	Glutathione S-transferase kappa OS=Rattus norvegicus GN=Gstk1 PE=2 SV=1	3.55792e+06	3.859e+06	3.23228e+06	2.49056e+06	3.68673e+06	6.56727e+06	4.36413e+06	3.97627e+06	2.44153e+06	4.12308e+06	3.05406e+06	3.96099e+06	4.14769e+06	4.47503e+06	4.04461e+06	4.22097e+06	3.92255e+06	3.38714e+06	2.6886e+06	2.21666e+06	3.17726e+06	4.93382e+06	4.4008e+06	3.26162e+06	2.02938e+06	3.55728e+06	2.61404e+06	4.33115e+06	4.14769e+06	5.33609e+06	4.14244e+06	4.10758e+06	1	0	2	2	2	1	2	4	2
P01835;P01836	2	2	112.29	0.852165	1.02363	Control	Exercise	Ig kappa chain C region, B allele OS=Rattus norvegicus PE=1 SV=1	658625	689436	621513	408592	1.67021e+06	560203	489271	412934	891283	723079	794677	791634	311737	684934	698155	488073	726123	605135	516973	363656	1.43941e+06	420865	493382	338718	740829	623853	680182	865611	311737	816726	715042	474962	0	0	0	0	2	0	0	0	1
O88994;D3Z900	5	5	257.34	0.852951	1.05045	Exercise	Control	MOSC domain-containing protein 2, mitochondrial OS=Rattus norvegicus GN=Marc2 PE=2 SV=1	1.63161e+06	1.78434e+06	2.81045e+06	1.43289e+06	1.39352e+06	1.92866e+06	1.44349e+06	1.82899e+06	1.96227e+06	3.10603e+06	2.06712e+06	1.51098e+06	1.23558e+06	2.32262e+06	1.56351e+06	1.20491e+06	1.79882e+06	1.56616e+06	2.33773e+06	1.27531e+06	1.20095e+06	1.44895e+06	1.45562e+06	1.50027e+06	1.63103e+06	2.6798e+06	1.7693e+06	1.65218e+06	1.23558e+06	2.76953e+06	1.60133e+06	1.17254e+06	2	0	0	2	1	2	1	3	1
D4A097	1	1	50.58	0.853464	1.0007	Control	Exercise	Protein Ak3l1 OS=Rattus norvegicus GN=Ak3l1 PE=3 SV=1	221638	215578	210897	231080	261067	212709	241004	363697	244151	279295	225295	317298	236881	260674	284478	108224	244352	189219	175424	205667	224991	159803	243029	298330	202937	240968	192835	346950	236881	310832	291359	105317	0	0	0	0	1	1	1	1	0
Q5BJQ0	19	17	1272.3	0.855056	1.02494	Control	Exercise	Chaperone activity of bc1 complex-like, mitochondrial OS=Rattus norvegicus GN=Adck3 PE=2 SV=1	6.24114e+07	5.83787e+07	5.68089e+07	4.74304e+07	6.2046e+07	9.05791e+07	8.06157e+07	8.04438e+07	5.23343e+07	8.43379e+07	5.26558e+07	6.15888e+07	6.91851e+07	7.65169e+07	7.43928e+07	5.4592e+07	6.88074e+07	5.12404e+07	4.72535e+07	4.22142e+07	5.3472e+07	6.80497e+07	8.1293e+07	6.59858e+07	4.35e+07	7.27645e+07	4.50692e+07	6.73442e+07	6.91851e+07	9.12399e+07	7.61923e+07	5.31254e+07	14	13	16	10	13	14	15	10	11
F1LVE2	1	1	38.35	0.85638	1.21993	Control	Exercise	Uncharacterized protein (Fragment) OS=Rattus norvegicus PE=4 SV=1	39052.9	8194.87	29098.8	20453.6	29554.1	2009.41	13272.6	4487.68	5511.57	9735.34	3115.93	36644.6	15446	17044.6	9120.67	23161.5	43055.1	7192.84	24204.3	18204.2	25470.1	1509.61	13384.1	3681.12	4581.18	8399.39	2666.99	40069	15446	20324.3	9341.28	22539.3	1	0	0	0	0	0	0	0	0
G3V7N5	28	2	1844.05	0.857477	1.0435	Exercise	Control	Carnitine O-palmitoyltransferase 2, mitochondrial OS=Rattus norvegicus GN=Cpt2 PE=3 SV=1	3.48278e+06	340503	119512	141779	83745.8	139334	111421	208988	217919	3.87119e+06	166165	88633.8	93039.3	96959	191960	103531	3.8397e+06	298868	99410	126187	72173.1	104678	112357	171427	181133	3.33996e+06	142224	96916.7	93039.3	115615	196604	100750	2	0	0	0	0	0	0	0	0
P56574;F1LRD5	34	33	2506.25	0.858507	1.02686	Exercise	Control	Isocitrate dehydrogenase [NADP], mitochondrial OS=Rattus norvegicus GN=Idh2 PE=1 SV=2	1.22004e+09	1.41129e+09	1.00861e+09	9.94969e+08	1.12441e+09	1.73913e+09	1.1057e+09	1.71216e+09	7.61173e+08	1.75092e+09	1.05423e+09	1.23296e+09	1.46328e+09	1.47639e+09	1.43419e+09	1.42023e+09	1.34507e+09	1.23872e+09	8.38963e+08	8.85546e+08	9.69033e+08	1.30656e+09	1.11499e+09	1.40444e+09	6.32683e+08	1.51064e+09	9.02339e+08	1.34818e+09	1.46328e+09	1.76047e+09	1.46888e+09	1.38207e+09	48	48	49	44	45	52	44	56	46
D3ZN43	1	1	80.76	0.860182	1.08246	Control	Exercise	NADH dehydrogenase (ubiquinone) complex I, assembly factor 6 OS=Rattus norvegicus GN=Ndufaf6 PE=3 SV=1	330752	516948	213862	109468	212161	443152	323255	438517	224204	458377	135124	425999	324102	292651	309191	221312	364649	453738	177890	97429	182843	332928	325971	359704	186357	395476	115656	465808	324102	348961	316669	215366	1	1	0	0	0	1	0	0	0
B1H271;P0C546	6	6	533.16	0.860231	1.02438	Control	Exercise	Slc25a42 protein OS=Rattus norvegicus GN=Slc25a42 PE=2 SV=1	4.01833e+06	4.48384e+06	3.28287e+06	2.78134e+06	2.89213e+06	3.98039e+06	4.02296e+06	4.94968e+06	3.73878e+06	4.67909e+06	3.24797e+06	2.94575e+06	3.98546e+06	4.2621e+06	3.52551e+06	3.30298e+06	4.43014e+06	3.93558e+06	2.73068e+06	2.47546e+06	2.49247e+06	2.99036e+06	4.05676e+06	4.06008e+06	3.10765e+06	4.03699e+06	2.78001e+06	3.22103e+06	3.98546e+06	5.0822e+06	3.61078e+06	3.21425e+06	4	2	3	2	3	5	5	7	5
D4A4P3	5	5	215.99	0.862875	1.00836	Exercise	Control	Protein LOC100361144 OS=Rattus norvegicus GN=LOC100361144 PE=4 SV=1	2.33704e+07	2.38459e+07	2.24313e+07	2.32369e+07	2.7559e+07	2.58684e+07	2.19296e+07	2.57989e+07	2.10161e+07	2.87699e+07	2.5093e+07	2.32557e+07	2.37649e+07	2.4666e+07	2.56473e+07	2.34494e+07	2.57654e+07	2.09301e+07	1.86583e+07	2.06814e+07	2.37506e+07	1.94342e+07	2.21139e+07	2.11621e+07	1.74684e+07	2.48219e+07	2.14777e+07	2.5429e+07	2.37649e+07	2.94121e+07	2.62677e+07	2.28195e+07	4	4	5	3	4	4	4	4	4
F1M8C8	1	1	46.2	0.863599	1.01588	Control	Exercise	Protein RGD1306282 (Fragment) OS=Rattus norvegicus GN=RGD1306282 PE=4 SV=1	81400.1	85050.3	102439	75224.9	78434.5	71852.2	50996.8	73119.1	65015.9	104409	80231.3	51867.4	74209.9	71972.3	86472.8	74670.1	89742.1	74650.7	85208.8	66951.9	67595.8	53980.7	51425.2	59977.6	54040.8	90081	68671.7	56714.4	74209.9	85820.9	88564.5	72664.1	0	0	0	0	0	1	0	0	0
Q561S0	15	15	1381.19	0.864211	1.01036	Control	Exercise	NADH dehydrogenase [ubiquinone] 1 alpha subcomplex subunit 10, mitochondrial OS=Rattus norvegicus GN=Ndufa10 PE=1 SV=1	2.56624e+08	2.37013e+08	2.16071e+08	1.98366e+08	1.78398e+08	2.43784e+08	2.09759e+08	2.52196e+08	2.27185e+08	2.4884e+08	1.96895e+08	1.74443e+08	1.93217e+08	2.57166e+08	2.45492e+08	2.30602e+08	2.82923e+08	2.08032e+08	1.79727e+08	1.7655e+08	1.53746e+08	1.83148e+08	2.11521e+08	2.06869e+08	1.88835e+08	2.14693e+08	1.68527e+08	1.90745e+08	1.93217e+08	3.06648e+08	2.5143e+08	2.24407e+08	23	23	20	24	21	23	22	24	20
D3ZZ21;D3ZDC3;D3ZQU9	5	4	337.94	0.864379	1.01503	Exercise	Control	NADH dehydrogenase (Ubiquinone) 1 beta subcomplex, 6 (Predicted) OS=Rattus norvegicus GN=Ndufb6 PE=4 SV=1	4.85725e+07	5.14475e+07	4.55464e+07	4.82722e+07	5.1872e+07	5.62127e+07	4.9773e+07	5.36133e+07	4.1376e+07	6.59838e+07	5.37453e+07	4.99868e+07	4.87274e+07	5.11715e+07	5.28824e+07	4.75279e+07	5.35503e+07	4.51567e+07	3.78854e+07	4.29634e+07	4.47039e+07	4.22311e+07	5.01912e+07	4.39775e+07	3.43915e+07	5.69291e+07	4.60018e+07	5.4658e+07	4.87274e+07	6.10176e+07	5.41616e+07	4.62511e+07	3	4	3	6	5	3	5	5	5
P35704;D4AAA7	2	2	98.18	0.866335	1.17047	Exercise	Control	Peroxiredoxin-2 OS=Rattus norvegicus GN=Prdx2 PE=1 SV=3	679067	588361	403416	747332	784425	360062	301336	115761	888074	436459	601137	853580	599585	139210	116406	1.02373e+06	748659	516419	335560	665143	676027	270505	303867	94955.3	738162	376566	514526	933346	599585	165996	119222	996228	1	0	0	0	1	0	0	0	1
Q5FVL8	2	2	104.17	0.866855	1.03364	Exercise	Control	ATP-binding cassette, sub-family B (MDR/TAP), member 10 OS=Rattus norvegicus GN=Abcb10 PE=2 SV=1	284229	104067	271692	224635	221313	317495	242543	289893	253199	345094	308739	78045.8	295034	308340	332414	100801	313357	91341.8	225992	199930	190730	238525	244580	237791	210458	297738	264256	85339.2	295034	367669	340454	98093.5	1	0	1	0	0	0	0	0	0
O70351;F1LNT4	19	19	1780.02	0.868574	1.00927	Exercise	Control	3-hydroxyacyl-CoA dehydrogenase type-2 OS=Rattus norvegicus GN=Hsd17b10 PE=1 SV=3	1.23213e+08	1.6446e+08	1.27799e+08	1.10012e+08	1.09994e+08	1.29355e+08	1.2408e+08	1.27751e+08	1.18907e+08	1.66112e+08	1.25877e+08	1.12847e+08	1.20501e+08	1.28974e+08	1.28111e+08	1.24757e+08	1.3584e+08	1.44351e+08	1.06303e+08	9.79133e+07	9.47939e+07	9.71812e+07	1.25122e+08	1.0479e+08	9.8835e+07	1.43317e+08	1.07741e+08	1.23392e+08	1.20501e+08	1.53791e+08	1.31209e+08	1.21405e+08	22	19	17	19	21	20	26	18	17
D3ZAF6;D3ZTP1	6	6	312.04	0.869646	1.0176	Exercise	Control	ATP synthase subunit f, mitochondrial OS=Rattus norvegicus GN=Atp5j2 PE=1 SV=1	1.38868e+08	1.26732e+08	1.40023e+08	1.18644e+08	1.20816e+08	1.37037e+08	1.12656e+08	1.27011e+08	1.18953e+08	1.77809e+08	1.355e+08	1.12256e+08	1.26888e+08	1.32134e+08	1.11465e+08	1.24762e+08	1.531e+08	1.11236e+08	1.16471e+08	1.05596e+08	1.04121e+08	1.02953e+08	1.13602e+08	1.04184e+08	9.88728e+07	1.53409e+08	1.15977e+08	1.22746e+08	1.26888e+08	1.57559e+08	1.14161e+08	1.21411e+08	5	7	8	7	6	5	6	6	8
D3ZZN3	17	17	1281.59	0.872027	1.01976	Control	Exercise	Protein Acss1 OS=Rattus norvegicus GN=Acss1 PE=4 SV=1	4.69719e+07	4.98085e+07	4.10869e+07	3.84981e+07	4.58746e+07	6.5416e+07	5.0953e+07	6.15534e+07	4.64452e+07	5.514e+07	3.63453e+07	4.30424e+07	5.35038e+07	5.32529e+07	5.2068e+07	5.26101e+07	5.17857e+07	4.37182e+07	3.41759e+07	3.42642e+07	3.95353e+07	4.91453e+07	5.13811e+07	5.04905e+07	3.8605e+07	4.75734e+07	3.11088e+07	4.70647e+07	5.35038e+07	6.34996e+07	5.33274e+07	5.11968e+07	17	14	12	12	14	16	15	15	11
D4A4A9	2	2	104.47	0.873365	1.01566	Exercise	Control	Protein Mrpl19 OS=Rattus norvegicus GN=Mrpl19 PE=4 SV=1	286487	329550	401929	290850	349329	481269	343582	494156	359450	422365	427011	243990	476086	411054	360928	322903	315847	289255	334323	258864	301056	361565	346469	405342	298773	364405	365488	266791	476086	490147	369659	314229	1	0	0	0	0	0	0	0	0
D3ZRH1	2	2	91.69	0.87433	1.01869	Control	Exercise	Protein Oxa1l OS=Rattus norvegicus GN=Oxa1l PE=3 SV=1	223798	238163	208481	212504	155757	251277	195198	300714	196645	201525	170268	231012	216480	256591	283991	196613	246733	209041	173414	189133	134233	188778	196838	246667	163450	173870	145736	252600	216480	305964	290860	191331	1	1	0	0	0	1	0	2	0
B1WBY5	4	3	249.3	0.876869	1.08914	Control	Exercise	DnaJ (Hsp40) homolog, subfamily C, member 11 OS=Rattus norvegicus GN=Dnajc11 PE=2 SV=1	2.48654e+06	4.86167e+06	5.36993e+06	1.34063e+06	1.76597e+06	1.90311e+06	1.93593e+06	1.83842e+06	3.22596e+06	4.98907e+06	1.97591e+06	1.74243e+06	1.84428e+06	2.29372e+06	1.75103e+06	1.92002e+06	2.74137e+06	4.26721e+06	4.46669e+06	1.19319e+06	1.52193e+06	1.42976e+06	1.95219e+06	1.508e+06	2.6814e+06	4.30444e+06	1.69122e+06	1.90526e+06	1.84428e+06	2.73506e+06	1.79339e+06	1.86844e+06	2	0	1	1	1	2	2	1	1
Q5U3Z7	1	1	39.21	0.878686	1.10072	Control	Exercise	Serine hydroxymethyltransferase OS=Rattus norvegicus GN=Shmt2 PE=2 SV=1	64226.6	130222	51240.9	41716.9	11414.6	74064.6	195147	141904	39724.1	61573.5	171253	68073.1	90687.7	39393.9	120569	53699.6	70808.7	114299	42622.1	37129	9837.22	55642.8	196787	116400	33018.4	53124	146579	74434.5	90687.7	46973.9	123485	52257	0	0	0	0	0	0	0	0	0
D4ABT9	1	1	40.04	0.879128	1.00629	Control	Exercise	Protein Sspn OS=Rattus norvegicus GN=Sspn PE=4 SV=1	134846	92824.3	174218	200959	162359	223395	212571	170716	169517	177199	183795	180302	131456	203727	141746	175575	148665	81474.2	144914	178858	139923	167831	214357	140034	140901	152883	157314	197152	131456	242927	145174	170858	0	0	1	0	0	0	1	0	1
G3V6T5	16	16	1247.17	0.879132	1.00955	Exercise	Control	Apoptosis-inducing factor 1, mitochondrial OS=Rattus norvegicus GN=Aifm1 PE=4 SV=1	4.92638e+07	5.28755e+07	4.029e+07	3.97716e+07	4.11155e+07	5.07429e+07	4.18819e+07	4.98323e+07	4.10289e+07	5.87851e+07	4.44593e+07	4.11123e+07	4.3628e+07	4.57967e+07	5.0273e+07	4.41841e+07	5.43125e+07	4.64101e+07	3.35131e+07	3.53977e+07	3.54338e+07	3.81218e+07	4.22337e+07	4.0876e+07	3.4103e+07	5.07182e+07	3.80537e+07	4.49542e+07	4.3628e+07	5.46087e+07	5.1489e+07	4.29971e+07	16	13	14	15	15	15	14	14	15
D3ZG43	13	13	1152.98	0.879852	1.00796	Control	Exercise	NADH dehydrogenase (Ubiquinone) Fe-S protein 3 (Predicted), isoform CRA_c OS=Rattus norvegicus GN=Ndufs3 PE=3 SV=1	2.12735e+08	2.22334e+08	1.86651e+08	1.82653e+08	1.85297e+08	2.22604e+08	1.68335e+08	2.08356e+08	2.06584e+08	2.14008e+08	1.91726e+08	1.62119e+08	1.71187e+08	2.05613e+08	2.14858e+08	2.10321e+08	2.34537e+08	1.95148e+08	1.55256e+08	1.62565e+08	1.59691e+08	1.67236e+08	1.6975e+08	1.70909e+08	1.71712e+08	1.8464e+08	1.64102e+08	1.77269e+08	1.71187e+08	2.45177e+08	2.20055e+08	2.04671e+08	21	15	20	18	17	18	18	16	17
A2VD12	1	1	36.05	0.880046	1.00346	Exercise	Control	Pre-B-cell leukemia transcription factor-interacting protein 1 OS=Rattus norvegicus GN=Pbxip1 PE=2 SV=1	362208	338560	399719	545287	426528	378313	500352	224475	356344	334239	507162	454295	451930	445868	331689	304900	399327	297163	332485	485319	367587	284216	504555	184131	296191	288373	434091	496749	451930	531660	339712	296709	0	0	0	0	0	0	0	0	0
P35571;F1LNI0;F1LQ85	15	15	807.26	0.880244	1.01793	Exercise	Control	Glycerol-3-phosphate dehydrogenase, mitochondrial OS=Rattus norvegicus GN=Gpd2 PE=1 SV=1	1.93246e+07	2.59685e+07	2.516e+07	1.9835e+07	2.19735e+07	2.09403e+07	2.21369e+07	2.05595e+07	2.65818e+07	2.25164e+07	2.05576e+07	1.9806e+07	2.08624e+07	2.88974e+07	2.27005e+07	1.71309e+07	2.13051e+07	2.27932e+07	2.0928e+07	1.76536e+07	1.8937e+07	1.57319e+07	2.23229e+07	1.68644e+07	2.20946e+07	1.94266e+07	1.75957e+07	2.16569e+07	2.08624e+07	3.44577e+07	2.32496e+07	1.66707e+07	8	5	6	6	7	5	8	5	8
D4AE56	8	8	513.63	0.880838	1.00753	Exercise	Control	Prostaglandin E synthase 2 (Predicted), isoform CRA_b OS=Rattus norvegicus GN=Ptges2 PE=4 SV=1	1.36048e+07	1.38471e+07	1.24359e+07	1.16616e+07	1.40626e+07	1.59904e+07	1.36953e+07	1.68179e+07	1.31235e+07	1.63214e+07	1.21356e+07	1.3427e+07	1.42395e+07	1.49255e+07	1.60333e+07	1.27536e+07	1.4999e+07	1.2154e+07	1.03441e+07	1.03791e+07	1.21193e+07	1.20132e+07	1.38103e+07	1.37953e+07	1.09082e+07	1.40817e+07	1.03871e+07	1.46817e+07	1.42395e+07	1.77974e+07	1.64211e+07	1.2411e+07	6	7	6	5	5	6	7	6	5
F1LWG8;F1M847	13	12	808.68	0.883536	1.0052	Control	Exercise	Uncharacterized protein (Fragment) OS=Rattus norvegicus PE=4 SV=1	8.29601e+06	8.93758e+06	7.23686e+06	1.23598e+07	8.07795e+06	9.40665e+06	8.75777e+06	5.59402e+06	7.89038e+06	8.42887e+06	9.32041e+06	9.80942e+06	7.77135e+06	8.93273e+06	7.43742e+06	8.7209e+06	9.1462e+06	7.84474e+06	6.0196e+06	1.10005e+07	6.96167e+06	7.06697e+06	8.83135e+06	4.58862e+06	6.55844e+06	7.2722e+06	7.97754e+06	1.07261e+07	7.77135e+06	1.06515e+07	7.61732e+06	8.48662e+06	4	9	6	6	8	6	9	5	6
G3V8M4	1	1	127.02	0.885924	1.01886	Exercise	Control	Cytochrome c oxidase subunit 6A, mitochondrial OS=Rattus norvegicus GN=Cox6a2 PE=3 SV=1	1.73139e+07	1.37672e+07	1.7537e+07	1.59038e+07	2.04074e+07	1.83322e+07	1.84492e+07	1.76169e+07	1.21484e+07	1.73583e+07	1.82536e+07	1.69301e+07	1.93046e+07	2.30945e+07	1.77006e+07	1.71655e+07	1.90882e+07	1.20839e+07	1.45872e+07	1.41547e+07	1.75873e+07	1.37725e+07	1.86042e+07	1.44507e+07	1.00977e+07	1.49763e+07	1.56236e+07	1.85122e+07	1.93046e+07	2.75382e+07	1.81287e+07	1.67044e+07	2	2	2	2	2	3	3	2	2
D4A311;Q7TP78	8	8	514.4	0.886995	1.0095	Exercise	Control	NADH dehydrogenase (Ubiquinone) 1 alpha subcomplex, 8 OS=Rattus norvegicus GN=Ndufa8 PE=4 SV=1	1.02655e+08	1.03025e+08	9.9309e+07	8.8239e+07	9.76277e+07	1.20593e+08	9.13112e+07	1.20704e+08	1.07457e+08	1.23563e+08	1.00242e+08	8.84892e+07	8.8676e+07	9.95622e+07	1.20275e+08	1.0302e+08	1.13176e+08	9.04274e+07	8.2605e+07	7.85348e+07	8.41367e+07	9.05982e+07	9.20784e+07	9.90104e+07	8.93174e+07	1.06607e+08	8.57994e+07	9.67585e+07	8.8676e+07	1.1872e+08	1.23184e+08	1.00252e+08	10	9	8	6	9	8	8	8	10
D3Z9U5	6	6	401.1	0.887111	1.00792	Exercise	Control	Parvalbumin alpha OS=Rattus norvegicus GN=Pvalb PE=4 SV=1	1.7289e+07	1.52907e+07	1.55635e+07	1.36286e+07	1.52557e+07	6.61342e+06	1.3727e+07	6.21073e+06	2.12496e+07	8.55427e+06	9.93316e+06	1.56393e+07	1.21651e+07	1.55557e+07	9.13785e+06	1.21635e+07	1.90608e+07	1.3421e+07	1.29457e+07	1.21298e+07	1.31475e+07	4.96849e+06	1.38424e+07	5.09449e+06	1.76626e+07	7.3804e+06	8.50201e+06	1.71007e+07	1.21651e+07	1.85489e+07	9.35888e+06	1.18368e+07	4	6	4	3	3	3	4	3	6
P10759	1	1	36.95	0.887363	1.04493	Control	Exercise	AMP deaminase 1 OS=Rattus norvegicus GN=Ampd1 PE=1 SV=1	132681	123845	209613	205888	136131	36298.3	135315	46457.7	228502	112786	137928	131068	77768.9	108706	61425.9	123920	146278	108702	174356	183245	117319	27269.9	136452	38108	189929	97309	118055	143316	77768.9	129622	62911.7	120591	0	0	0	0	0	0	0	0	1
F1LP30;D3ZC57;Q5I0C3	16	15	980.18	0.888259	1.00871	Exercise	Control	Methylcrotonoyl-CoA carboxylase subunit alpha, mitochondrial OS=Rattus norvegicus GN=Mccc1 PE=4 SV=1	2.67146e+07	2.60524e+07	2.16028e+07	2.03134e+07	2.30321e+07	2.84788e+07	2.2099e+07	3.65973e+07	2.04799e+07	3.1936e+07	2.77586e+07	2.10067e+07	2.92839e+07	2.49666e+07	2.9124e+07	2.21201e+07	2.94524e+07	2.28669e+07	1.79691e+07	1.80794e+07	1.98494e+07	2.13954e+07	2.22847e+07	3.00197e+07	1.70227e+07	2.75535e+07	2.37592e+07	2.29698e+07	2.92839e+07	2.97705e+07	2.98284e+07	2.15259e+07	12	10	9	8	9	10	12	10	11
Q6IFV9	5	1	257.85	0.89023	1.90565	Exercise	Control	Protein Krt34 OS=Rattus norvegicus GN=Krt34 PE=2 SV=1	35546.3	12678.6	189360	7742.56	21618.5	37594.3	0	90019.5	9645.23	106573	33855.3	16726.7	481940	21796.7	0	81353.5	39189.1	11128.3	157509	6891.06	18631.1	28243.6	0	73840.5	8017.06	91948.6	28977.5	18289.9	481940	25990.7	0	79168	0	0	0	0	0	0	0	0	0
D4A6M0;F1LUP2	5	5	452.92	0.891183	1.01547	Control	Exercise	Mitsugumin 29 (Predicted) OS=Rattus norvegicus GN=Sypl2 PE=2 SV=1	5.44777e+07	5.39293e+07	6.54959e+07	5.68191e+07	6.83888e+07	8.42656e+07	5.95327e+07	6.43301e+07	6.31499e+07	6.07689e+07	6.7513e+07	6.66973e+07	6.24505e+07	6.77825e+07	5.43676e+07	5.67797e+07	6.00606e+07	4.73351e+07	5.44793e+07	5.05704e+07	5.89383e+07	6.33065e+07	6.00328e+07	5.27682e+07	5.24898e+07	5.24298e+07	5.77858e+07	7.29302e+07	6.24505e+07	8.0825e+07	5.56827e+07	5.52544e+07	4	5	5	3	7	5	4	6	7
P14141	8	8	535.12	0.892419	1.05614	Control	Exercise	Carbonic anhydrase 3 OS=Rattus norvegicus GN=Ca3 PE=1 SV=3	2.86836e+07	2.8058e+07	3.02751e+07	2.59413e+07	2.77041e+07	6.03983e+06	1.7616e+07	8.08755e+06	3.34283e+07	7.76899e+06	1.37218e+07	3.92762e+07	1.62084e+07	1.79955e+07	1.13399e+07	2.35018e+07	3.16231e+07	2.46272e+07	2.51827e+07	2.30883e+07	2.38757e+07	4.53756e+06	1.7764e+07	6.63399e+06	2.77854e+07	6.70288e+06	1.17447e+07	4.29465e+07	1.62084e+07	2.14581e+07	1.16142e+07	2.28704e+07	10	6	6	5	7	2	5	2	7
Q5XIH3	22	22	1691.79	0.895692	1.00483	Control	Exercise	NADH dehydrogenase (Ubiquinone) flavoprotein 1 OS=Rattus norvegicus GN=Ndufv1 PE=2 SV=1	4.4132e+08	4.53066e+08	3.63786e+08	3.87416e+08	4.43622e+08	4.85522e+08	4.24283e+08	4.71566e+08	3.71116e+08	4.4867e+08	4.30344e+08	3.7049e+08	4.31019e+08	4.72265e+08	5.31234e+08	3.98759e+08	4.86548e+08	3.97667e+08	3.02596e+08	3.44809e+08	3.82318e+08	3.6476e+08	4.27848e+08	3.86813e+08	3.08469e+08	3.87101e+08	3.68341e+08	4.05112e+08	4.31019e+08	5.63136e+08	5.44083e+08	3.88047e+08	31	25	25	31	24	28	21	27	26
D3ZMK2	1	1	89.11	0.895766	1.03729	Control	Exercise	Uncharacterized protein OS=Rattus norvegicus PE=3 SV=1	4.43082e+07	2.19666e+07	4.05971e+07	3.56456e+07	2.89667e+07	5.31625e+07	1.84821e+07	4.4998e+07	4.33965e+07	5.05898e+07	4.05119e+07	2.02097e+07	3.60639e+07	2.16538e+07	3.22596e+07	3.30836e+07	4.8849e+07	1.92806e+07	3.37686e+07	3.17255e+07	2.49638e+07	3.99396e+07	1.86374e+07	3.69106e+07	3.60709e+07	4.36476e+07	3.4675e+07	2.20983e+07	3.60639e+07	2.58203e+07	3.30399e+07	3.21949e+07	2	1	1	0	1	0	1	1	1
A9UMV7	1	1	55.37	0.89808	1.01482	Control	Exercise	Protein Uqcr11 OS=Rattus norvegicus GN=Uqcr11 PE=4 SV=1	1.46879e+07	1.14562e+07	1.42349e+07	9.83911e+06	1.18681e+07	1.46246e+07	9.53131e+06	1.48161e+07	1.44585e+07	1.50016e+07	1.2838e+07	9.27076e+06	1.0543e+07	1.30022e+07	1.29614e+07	1.1507e+07	1.61932e+07	1.00554e+07	1.18405e+07	8.75704e+06	1.0228e+07	1.09871e+07	9.61139e+06	1.21532e+07	1.20178e+07	1.2943e+07	1.09883e+07	1.01371e+07	1.0543e+07	1.55041e+07	1.32749e+07	1.11979e+07	1	0	1	1	0	0	1	1	1
P04762;D3ZYF1	7	6	389.47	0.900642	1.13129	Control	Exercise	Catalase OS=Rattus norvegicus GN=Cat PE=1 SV=3	792058	1.40191e+06	903420	788606	1.61613e+06	923559	3.26739e+06	1.22769e+06	912237	1.39983e+06	1.03838e+06	1.40783e+06	1.49652e+06	1.18855e+06	1.29892e+06	911097	873230	1.23049e+06	751462	701878	1.3928e+06	693846	3.29484e+06	1.00704e+06	758245	1.20774e+06	888772	1.53939e+06	1.49652e+06	1.41724e+06	1.33034e+06	886621	0	1	0	0	2	0	5	2	0
D4A5T2	2	2	116.88	0.902224	1.05344	Control	Exercise	Protein RGD1311612 OS=Rattus norvegicus GN=RGD1311612 PE=3 SV=1	452480	269570	322396	520780	415304	630747	239124	448752	427747	431318	422332	260095	409568	370276	406683	403765	498851	236608	268168	463506	357913	473864	241133	368098	355541	372130	361483	284401	409568	441523	416520	392918	0	0	0	1	0	1	0	1	0
P0CD94	1	1	40.98	0.905402	1.05159	Control	Exercise	UPF0723 protein C11orf83 homolog OS=Rattus norvegicus PE=3 SV=1	713640	727951	768567	293961	429067	310214	431780	674889	568376	766899	281260	459879	462056	572960	441374	583864	786775	638941	639292	261632	369775	233056	435407	553592	472430	661660	240736	502854	462056	683206	452050	568179	0	0	0	1	1	1	0	1	0
G3V741;P16036	18	18	1372.64	0.907411	1.00398	Exercise	Control	Phosphate carrier protein, mitochondrial OS=Rattus norvegicus GN=Slc25a3 PE=3 SV=1	4.08421e+08	4.13614e+08	3.95811e+08	3.66532e+08	4.46156e+08	5.26542e+08	3.66406e+08	4.65578e+08	3.91152e+08	5.13616e+08	4.2775e+08	3.73446e+08	4.084e+08	4.39118e+08	4.43367e+08	4.05718e+08	4.50277e+08	3.6304e+08	3.29235e+08	3.26222e+08	3.84503e+08	3.95577e+08	3.69484e+08	3.81901e+08	3.25123e+08	4.43134e+08	3.6612e+08	4.08344e+08	4.084e+08	5.23611e+08	4.54091e+08	3.94819e+08	22	17	16	16	23	18	15	17	18
F1LZW5	3	3	148.62	0.907811	1.15637	Exercise	Control	Protein Unc84b (Fragment) OS=Rattus norvegicus GN=Sun2 PE=4 SV=1	774713	643679	599467	553099	1.18518e+06	1.01545e+06	471576	908695	1.58488e+06	1.4091e+06	492736	311745	344957	865905	823491	1.28102e+06	854107	564973	498635	492271	1.02141e+06	762881	475538	745377	1.31734e+06	1.21574e+06	421743	340878	344957	1.03252e+06	843410	1.24661e+06	0	0	0	0	3	0	0	0	1
B2RYW4	1	1	56.17	0.909136	1.0087	Control	Exercise	Mitochondrial ribosomal protein L53 OS=Rattus norvegicus GN=Mrpl53 PE=4 SV=1	202461	151415	173114	128957	218593	227587	156539	146264	207040	168794	179038	106649	151182	194019	229475	156611	223209	132901	143996	114775	188386	170980	157855	119976	172090	145631	153243	116615	151182	231352	235026	152404	0	1	1	0	0	1	0	1	0
F1LP21	1	1	71.24	0.912688	1.02192	Control	Exercise	Protein Timm8a1 OS=Rattus norvegicus GN=Timm8a1 PE=4 SV=1	609549	1.17552e+06	832563	436033	491462	1.16375e+06	906296	981915	496614	1.01732e+06	979900	840276	805703	827637	811605	676490	672016	1.03178e+06	692524	388080	423548	874292	913911	805438	412782	877717	838718	918800	805703	986887	831236	658317	0	0	0	1	1	1	1	1	0
F1M6R2	7	7	490.41	0.912851	1.00178	Exercise	Control	Uncharacterized protein (Fragment) OS=Rattus norvegicus GN=Bsg PE=4 SV=1	1.3106e+07	1.0218e+07	1.07055e+07	1.26497e+07	1.35362e+07	1.40956e+07	1.0461e+07	1.12058e+07	1.08712e+07	1.28106e+07	1.34118e+07	1.09948e+07	1.09922e+07	1.28266e+07	1.20911e+07	1.21505e+07	1.44491e+07	8.96862e+06	8.90481e+06	1.12586e+07	1.16656e+07	1.05897e+07	1.05489e+07	9.19183e+06	9.03611e+06	1.10527e+07	1.14794e+07	1.20222e+07	1.09922e+07	1.52946e+07	1.23835e+07	1.18241e+07	5	5	4	6	4	6	6	5	6
D3ZX74	5	5	270.05	0.913509	1.0076	Control	Exercise	Coenzyme Q10 homolog A (Yeast) (Predicted), isoform CRA_b OS=Rattus norvegicus GN=Coq10a PE=4 SV=1	9.86692e+06	1.06636e+07	7.57554e+06	7.3435e+06	8.39942e+06	9.17868e+06	8.83e+06	9.5896e+06	9.19178e+06	1.11591e+07	8.31796e+06	7.48398e+06	7.97078e+06	8.94694e+06	9.28678e+06	8.5512e+06	1.08781e+07	9.35975e+06	6.30131e+06	6.53589e+06	7.23871e+06	6.8957e+06	8.90419e+06	7.86608e+06	7.64015e+06	9.62776e+06	7.11952e+06	8.18336e+06	7.97078e+06	1.06685e+07	9.51141e+06	8.32148e+06	5	4	4	4	4	3	5	3	3
D3ZE15;D3ZJR0;F1LZC5	8	8	580.8	0.914348	1.00541	Control	Exercise	RCG38845, isoform CRA_b OS=Rattus norvegicus GN=rCG_38845 PE=4 SV=1	1.86864e+08	1.77934e+08	1.5954e+08	1.44049e+08	1.78861e+08	1.8814e+08	1.42828e+08	1.75508e+08	1.73443e+08	2.09835e+08	1.48603e+08	1.48861e+08	1.49713e+08	1.72274e+08	1.72234e+08	1.71477e+08	2.06014e+08	1.56177e+08	1.32705e+08	1.28207e+08	1.54145e+08	1.41344e+08	1.44028e+08	1.43965e+08	1.44164e+08	1.8104e+08	1.27192e+08	1.62772e+08	1.49713e+08	2.05423e+08	1.764e+08	1.66871e+08	15	12	12	12	10	13	12	12	15
Q63910	3	1	155.12	0.916029	1.10671	Exercise	Control	Alpha globin OS=Rattus norvegicus GN=LOC287167 PE=3 SV=2	100225	79580.8	61312.3	95695.4	68210.9	58594.2	31771.8	37269.4	94368.6	71734.7	63499.1	122098	55814.1	22622.1	33078.5	126288	110497	69850.1	50999.4	85171.2	58785	44020.3	32038.7	30571.1	78438.6	61890.8	54350.2	133508	55814.1	26974.9	33878.6	122895	1	0	0	0	0	0	0	0	0
P70583;D4A6V3	4	4	263.96	0.91788	1.00135	Control	Exercise	Deoxyuridine 5'-triphosphate nucleotidohydrolase OS=Rattus norvegicus GN=Dut PE=2 SV=3	1.60965e+06	1.45711e+06	1.44351e+06	1.54164e+06	1.01983e+06	1.18473e+06	988461	1.31799e+06	1.53488e+06	2.01076e+06	1.39102e+06	1.11127e+06	1.08122e+06	1.17636e+06	1.2533e+06	989848	1.77461e+06	1.27895e+06	1.20071e+06	1.3721e+06	878904	890059	996766	1.08111e+06	1.27579e+06	1.73483e+06	1.19061e+06	1.21512e+06	1.08122e+06	1.40271e+06	1.28361e+06	963257	2	2	1	0	1	0	0	0	2
P80432	1	1	55.35	0.918752	1.00222	Control	Exercise	Cytochrome c oxidase subunit 7C, mitochondrial OS=Rattus norvegicus GN=Cox7c PE=1 SV=2	9.14823e+06	9.11115e+06	9.45898e+06	1.10778e+07	1.19415e+07	1.63755e+07	1.29965e+07	1.25761e+07	9.73814e+06	1.25303e+07	1.20296e+07	1.16821e+07	1.24331e+07	1.21118e+07	1.30554e+07	8.89986e+06	1.00858e+07	7.99708e+06	7.86796e+06	9.85952e+06	1.02913e+07	1.23024e+07	1.31057e+07	1.03158e+07	8.09428e+06	1.08108e+07	1.02964e+07	1.27738e+07	1.24331e+07	1.44422e+07	1.33711e+07	8.66077e+06	2	3	3	4	4	3	3	4	3
Q5XIT9;D3ZUG1	20	20	1484.48	0.920699	1.00508	Control	Exercise	Methylcrotonoyl-CoA carboxylase beta chain, mitochondrial OS=Rattus norvegicus GN=Mccc2 PE=2 SV=1	4.59367e+07	4.09328e+07	3.72322e+07	3.10187e+07	3.51111e+07	4.61658e+07	3.54388e+07	5.91732e+07	4.04055e+07	5.00561e+07	4.01491e+07	3.53798e+07	4.39903e+07	4.1216e+07	4.24416e+07	3.56977e+07	5.06443e+07	3.59277e+07	3.09696e+07	2.76074e+07	3.02591e+07	3.46831e+07	3.57366e+07	4.85381e+07	3.35848e+07	4.31871e+07	3.43645e+07	3.86861e+07	4.39903e+07	4.91466e+07	4.34681e+07	3.47387e+07	19	16	14	11	13	13	14	18	13
P47853	1	1	87.62	0.921871	1.00646	Exercise	Control	Biglycan OS=Rattus norvegicus GN=Bgn PE=2 SV=1	352659	281421	282515	275217	231244	291845	172456	232132	281178	226480	298500	308657	242482	177831	292872	305189	388800	247010	234995	244949	199289	219255	173905	190411	233713	195401	255493	337500	242482	212048	299956	296990	1	1	1	1	1	1	1	1	1
G3V8L9	1	1	83.7	0.922985	1.01742	Exercise	Control	Polymerase I and transcript release factor (Predicted) OS=Rattus norvegicus GN=Ptrf PE=4 SV=1	398289	511614	359882	359893	488785	503667	414829	643671	525918	554655	443350	301512	344281	470398	480860	623777	439107	449056	299349	320313	421241	378392	418315	527985	437140	478542	379473	329688	344281	560910	492491	607020	1	1	0	1	1	1	1	1	0
Q5I0K8	1	1	92.57	0.923897	1.00777	Exercise	Control	28S ribosomal protein S7, mitochondrial OS=Rattus norvegicus GN=Mrps7 PE=2 SV=2	101693	105351	109799	74041.1	128698	150432	111181	162257	138605	127084	84946.7	93690.1	120330	115831	169872	100422	112115	92468.9	91330.9	65898.3	110914	113016	112115	133095	115208	109645	72707.7	102445	120330	138119	173981	97724.7	0	0	0	0	1	1	0	1	0
D3ZM21	2	2	117.96	0.929039	1.00839	Control	Exercise	Catechol-O-methyltransferase domain containing 1 (Predicted), isoform CRA_a OS=Rattus norvegicus GN=Comtd1 PE=4 SV=1	2.33867e+06	1.97575e+06	2.00204e+06	1.6327e+06	2.19076e+06	3.04453e+06	2.45117e+06	2.48022e+06	3.12276e+06	2.20362e+06	1.84211e+06	1.92534e+06	2.13193e+06	2.6932e+06	2.08906e+06	1.95708e+06	2.57834e+06	1.73416e+06	1.66529e+06	1.45315e+06	1.88802e+06	2.28727e+06	2.47176e+06	2.03446e+06	2.59562e+06	1.90123e+06	1.5767e+06	2.10526e+06	2.13193e+06	3.21141e+06	2.13959e+06	1.9045e+06	2	1	0	0	1	1	0	0	1
Q07936	1	1	42.56	0.929251	1.03537	Exercise	Control	Annexin A2 OS=Rattus norvegicus GN=Anxa2 PE=1 SV=2	283245	309200	331739	276910	305613	262274	242724	351572	192337	351430	361958	306059	407167	319213	194564	314143	312272	271392	275940	246457	263381	197040	244763	288385	159870	303204	309808	334661	407167	380635	199270	305704	0	0	0	0	1	0	0	1	0
P12007	17	17	1224.52	0.930072	1.00879	Control	Exercise	Isovaleryl-CoA dehydrogenase, mitochondrial OS=Rattus norvegicus GN=Ivd PE=1 SV=2	1.08272e+08	1.18535e+08	1.2487e+08	1.10597e+08	1.21608e+08	1.36349e+08	1.12305e+08	1.59009e+08	1.08662e+08	1.46329e+08	1.28959e+08	1.13724e+08	1.25288e+08	1.19545e+08	1.21842e+08	1.18554e+08	1.19368e+08	1.04041e+08	1.03866e+08	9.84343e+07	1.04803e+08	1.02435e+08	1.13248e+08	1.3043e+08	9.03195e+07	1.26249e+08	1.10379e+08	1.24351e+08	1.25288e+08	1.42548e+08	1.24789e+08	1.15369e+08	15	17	15	15	15	15	16	18	14
F1LNT7	1	1	68.82	0.930184	1.01396	Exercise	Control	Uncharacterized protein (Fragment) OS=Rattus norvegicus GN=Tfam PE=4 SV=1	1.23215e+06	1.57459e+06	1.40294e+06	1.54727e+06	1.91725e+06	1.91305e+06	1.58876e+06	1.73944e+06	1.2537e+06	2.27283e+06	1.61743e+06	1.40838e+06	1.67339e+06	1.72636e+06	1.79775e+06	1.3459e+06	1.35842e+06	1.38206e+06	1.16696e+06	1.37711e+06	1.65231e+06	1.43723e+06	1.60211e+06	1.42681e+06	1.04207e+06	1.96094e+06	1.3844e+06	1.54e+06	1.67339e+06	2.05854e+06	1.84124e+06	1.30975e+06	1	1	1	1	1	1	0	1	1
D3ZM09	3	3	161.56	0.9311	1.00482	Control	Exercise	Protein Sars2 OS=Rattus norvegicus GN=Sars2 PE=3 SV=1	871778	808366	770260	656732	755675	943056	809073	1.05679e+06	1.03346e+06	1.03089e+06	688807	796620	680141	802153	826925	780737	961120	709523	640700	584507	651249	708493	815871	866858	859001	889423	589565	871064	680141	956499	846927	759763	2	2	3	1	1	2	2	2	1
P10888	11	11	540.28	0.931426	1.00083	Exercise	Control	Cytochrome c oxidase subunit 4 isoform 1, mitochondrial OS=Rattus norvegicus GN=Cox4i1 PE=1 SV=1	3.00124e+08	2.97073e+08	2.74808e+08	2.82512e+08	2.72174e+08	3.09898e+08	2.74222e+08	3.48555e+08	2.49048e+08	3.90955e+08	3.20252e+08	2.73341e+08	2.81158e+08	3.03885e+08	2.77847e+08	2.64837e+08	3.30882e+08	2.60749e+08	2.28585e+08	2.51442e+08	2.34563e+08	2.32818e+08	2.76526e+08	2.8591e+08	2.07007e+08	3.37306e+08	2.7411e+08	2.98885e+08	2.81158e+08	3.62357e+08	2.84568e+08	2.57723e+08	10	10	9	8	10	12	12	11	10
P15800	2	1	96.76	0.932621	1.05986	Control	Exercise	Laminin subunit beta-2 OS=Rattus norvegicus GN=Lamb2 PE=2 SV=1	21598.7	41322.7	50972.2	48226.9	144045	104910	29608.6	56323.6	116141	30494.7	55239.7	25282.6	56928.4	35992.6	41481.4	107377	23812.2	36270	42398.6	42923	124140	78816.2	29857.3	46200.6	96536.1	26310	47280.9	27645.2	56928.4	42918.1	42484.7	104493	0	0	0	0	1	1	0	0	0
B0BN94	1	1	51.78	0.93645	1.00001	Control	Exercise	Protein FAM136A OS=Rattus norvegicus GN=Fam136a PE=2 SV=1	599967	203281	376979	370094	360096	413333	262179	290995	266935	384297	530851	283655	380287	229558	351419	449892	661453	178425	313570	329392	310335	310527	264381	238695	221875	331561	454367	310162	380287	273729	359919	437806	0	0	0	0	0	0	0	1	0
Q9WVK3	3	3	213.78	0.937517	1.02659	Control	Exercise	Peroxisomal trans-2-enoyl-CoA reductase OS=Rattus norvegicus GN=Pecr PE=2 SV=1	1.63011e+06	2.62107e+06	1.66147e+06	1.28762e+06	1.34313e+06	2.17414e+06	2.22927e+06	2.31389e+06	1.46372e+06	1.86979e+06	1.81634e+06	1.46261e+06	2.01303e+06	1.74477e+06	2.06974e+06	2.42549e+06	1.79717e+06	2.30058e+06	1.38201e+06	1.14601e+06	1.15753e+06	1.63337e+06	2.248e+06	1.89802e+06	1.21664e+06	1.61321e+06	1.55464e+06	1.59929e+06	2.01303e+06	2.08049e+06	2.1198e+06	2.36033e+06	3	2	1	1	1	2	3	3	0
F1M7U1	6	6	336.33	0.940657	1.00476	Exercise	Control	Acylpyruvase FAHD1, mitochondrial (Fragment) OS=Rattus norvegicus GN=Fahd1 PE=4 SV=1	4.41813e+06	4.6878e+06	3.22673e+06	3.52113e+06	3.50919e+06	3.71849e+06	3.11507e+06	4.19883e+06	3.90232e+06	4.59636e+06	3.87582e+06	3.14754e+06	3.1517e+06	4.51831e+06	3.51554e+06	3.83234e+06	4.87091e+06	4.1146e+06	2.68399e+06	3.13389e+06	3.02426e+06	2.7936e+06	3.14124e+06	3.44418e+06	3.24359e+06	3.96561e+06	3.3174e+06	3.44168e+06	3.1517e+06	5.3877e+06	3.60058e+06	3.72939e+06	2	1	1	1	1	2	1	1	2
P29147	13	13	882.1	0.940835	1.00349	Control	Exercise	D-beta-hydroxybutyrate dehydrogenase, mitochondrial OS=Rattus norvegicus GN=Bdh1 PE=1 SV=2	2.67452e+07	3.51989e+07	4.78485e+07	4.05929e+07	2.28671e+07	4.54818e+07	4.95976e+07	3.29347e+07	3.73087e+07	4.27037e+07	4.14168e+07	4.44569e+07	2.63431e+07	4.36361e+07	2.57769e+07	3.85773e+07	2.9486e+07	3.0895e+07	3.98002e+07	3.61286e+07	1.97072e+07	3.41692e+07	5.00143e+07	2.70154e+07	3.10108e+07	3.68436e+07	3.54495e+07	4.86114e+07	2.63431e+07	5.20323e+07	2.64004e+07	3.75409e+07	9	8	11	10	6	11	11	11	11
B2GV65	3	3	115.5	0.943876	1.00377	Control	Exercise	HIG1 domain family, member 2A OS=Rattus norvegicus GN=Higd2a PE=4 SV=1	1.71459e+06	1.50607e+06	1.48638e+06	1.40771e+06	1.45806e+06	1.90226e+06	1.8329e+06	2.28091e+06	1.56382e+06	2.09479e+06	1.31174e+06	1.5357e+06	1.67597e+06	1.9061e+06	2.11249e+06	1.33728e+06	1.89031e+06	1.32191e+06	1.23637e+06	1.25289e+06	1.25657e+06	1.42912e+06	1.8483e+06	1.87097e+06	1.29983e+06	1.80733e+06	1.12275e+06	1.67921e+06	1.67597e+06	2.27286e+06	2.16358e+06	1.30136e+06	0	0	0	0	0	1	1	2	0
Q6PDU7	4	4	595.84	0.946848	1.00371	Control	Exercise	ATP synthase subunit g, mitochondrial OS=Rattus norvegicus GN=Atp5l PE=1 SV=2	4.04656e+08	4.00396e+08	3.54077e+08	3.11055e+08	3.30738e+08	3.65941e+08	3.19014e+08	3.27704e+08	3.30186e+08	4.32066e+08	3.44353e+08	3.16874e+08	3.4418e+08	3.63115e+08	3.40879e+08	3.31524e+08	4.46126e+08	3.51438e+08	2.9452e+08	2.76846e+08	2.85034e+08	2.74922e+08	3.21694e+08	2.68806e+08	2.74449e+08	3.72776e+08	2.94739e+08	3.46486e+08	3.4418e+08	4.32984e+08	3.49124e+08	3.22618e+08	14	12	14	11	10	12	12	12	14
D3ZT98	1	1	66.81	0.94869	1.04202	Exercise	Control	Protein Bola3 OS=Rattus norvegicus GN=Bola3 PE=3 SV=1	307742	245272	145369	143788	190641	463032	121248	530732	74282.1	681573	125516	199914	194378	421599	266492	274326	339280	215282	120917	127974	164297	347864	122267	435345	61742.8	588043	107432	218596	194378	502721	272938	266957	1	0	0	0	0	0	0	0	0
B2RYW3	9	9	660.61	0.949861	1.00024	Control	Exercise	NADH dehydrogenase (Ubiquinone) 1 beta subcomplex, 9 OS=Rattus norvegicus GN=Ndufb9 PE=2 SV=1	7.48731e+07	6.70235e+07	5.90039e+07	6.00432e+07	7.36615e+07	8.62639e+07	6.0335e+07	8.28024e+07	6.09188e+07	8.30219e+07	6.56305e+07	6.63386e+07	6.82718e+07	8.07451e+07	7.3756e+07	6.51877e+07	8.25463e+07	5.88282e+07	4.90792e+07	5.34398e+07	6.34824e+07	6.48078e+07	6.08419e+07	6.79205e+07	5.06353e+07	7.16291e+07	5.61746e+07	7.25379e+07	6.82718e+07	9.62817e+07	7.55401e+07	6.34365e+07	7	6	6	9	8	10	6	8	9
B1WC61	16	16	999.74	0.950333	1.0049	Exercise	Control	Acad9 protein OS=Rattus norvegicus GN=Acad9 PE=2 SV=1	1.47105e+07	1.66283e+07	1.4626e+07	1.39352e+07	1.52907e+07	1.50303e+07	1.34436e+07	1.53885e+07	1.53545e+07	2e+07	1.53984e+07	1.18857e+07	1.34014e+07	1.5411e+07	1.46881e+07	1.3497e+07	1.62181e+07	1.45951e+07	1.21658e+07	1.24027e+07	1.31777e+07	1.12919e+07	1.35566e+07	1.26228e+07	1.27626e+07	1.72555e+07	1.31798e+07	1.29964e+07	1.34014e+07	1.83763e+07	1.50434e+07	1.31344e+07	6	9	7	9	5	8	12	11	10
P19511	17	17	1062.39	0.950587	1.00043	Exercise	Control	ATP synthase subunit b, mitochondrial OS=Rattus norvegicus GN=Atp5f1 PE=1 SV=1	4.89197e+08	4.57731e+08	4.26444e+08	3.60691e+08	4.1499e+08	4.57309e+08	4.49057e+08	4.29829e+08	5.00849e+08	5.24049e+08	3.99433e+08	3.796e+08	3.9669e+08	4.85365e+08	4.15766e+08	3.84994e+08	5.39331e+08	4.01762e+08	3.54715e+08	3.21023e+08	3.57643e+08	3.43564e+08	4.5283e+08	3.52577e+08	4.16303e+08	4.52136e+08	3.41883e+08	4.15073e+08	3.9669e+08	5.78756e+08	4.25823e+08	3.74652e+08	19	24	18	14	17	17	21	17	19
D3ZFU3;D3ZYY0	4	4	271.03	0.952999	1.00716	Control	Exercise	Protein Sdr39u1 OS=Rattus norvegicus GN=Sdr39u1 PE=4 SV=1	9.40395e+06	1.08783e+07	9.49433e+06	6.27237e+06	7.48542e+06	8.72067e+06	8.91217e+06	7.05871e+06	1.00856e+07	1.09531e+07	7.78657e+06	6.53279e+06	7.99895e+06	8.25468e+06	8.6585e+06	7.47075e+06	1.03677e+07	9.54816e+06	7.89735e+06	5.58256e+06	6.45102e+06	6.55161e+06	8.98704e+06	5.79006e+06	8.38305e+06	9.45003e+06	6.66469e+06	7.14328e+06	7.99895e+06	9.84301e+06	8.86793e+06	7.27006e+06	3	1	1	0	1	3	2	1	3
F1LYS7	1	1	40.56	0.954666	1.03033	Exercise	Control	Protein Sgcd (Fragment) OS=Rattus norvegicus GN=Sgcd PE=4 SV=1	305841	201845	215402	313378	146284	141625	123042	129595	299819	111185	293635	198461	156053	131570	121083	313029	337184	177164	179171	278914	126069	106399	124076	106304	249207	95927.7	251328	217007	156053	156887	124012	304620	0	0	0	0	0	1	0	0	0
O35092	1	1	67.79	0.956029	1.01135	Control	Exercise	Mitochondrial import inner membrane translocase subunit Tim17-A OS=Rattus norvegicus GN=Timm17a PE=2 SV=1	883840	995604	1.08675e+06	665367	1.12501e+06	1.2233e+06	1.10933e+06	1.21953e+06	1.09138e+06	1.06243e+06	881486	953126	1.03074e+06	1.05347e+06	1.34056e+06	802264	974418	873866	903958	592192	969546	919034	1.11865e+06	1.00034e+06	907151	916640	754483	1.04219e+06	1.03074e+06	1.25617e+06	1.37298e+06	780713	0	1	0	1	0	0	0	0	1
P07632	6	6	481.73	0.95677	1.00516	Control	Exercise	Superoxide dismutase [Cu-Zn] OS=Rattus norvegicus GN=Sod1 PE=1 SV=2	1.00223e+07	8.1992e+06	7.94363e+06	8.90473e+06	9.77236e+06	8.49338e+06	8.95394e+06	6.70964e+06	6.84949e+06	9.82341e+06	8.34842e+06	8.7605e+06	8.85599e+06	9.37103e+06	8.11577e+06	8.52034e+06	1.10494e+07	7.19664e+06	6.60749e+06	7.92542e+06	8.42193e+06	6.38085e+06	9.02917e+06	5.50373e+06	5.69325e+06	8.47538e+06	7.14559e+06	9.57917e+06	8.85599e+06	1.11742e+07	8.31207e+06	8.29145e+06	5	5	5	5	5	5	4	4	5
D3Z880	6	6	363.44	0.957376	1.01707	Exercise	Control	2-oxoisovalerate dehydrogenase subunit beta, mitochondrial OS=Rattus norvegicus GN=Bckdhb PE=4 SV=1	1.02334e+07	1.17826e+07	8.05971e+06	9.585e+06	7.85131e+06	9.96693e+06	9.42592e+06	1.21829e+07	6.74957e+06	1.31596e+07	8.231e+06	8.70794e+06	1.13022e+07	1.06134e+07	1.25848e+07	9.08931e+06	1.12821e+07	1.03419e+07	6.70404e+06	8.53088e+06	6.76635e+06	7.48789e+06	9.50512e+06	9.99333e+06	5.6102e+06	1.13538e+07	7.04509e+06	9.52169e+06	1.13022e+07	1.26556e+07	1.28892e+07	8.84514e+06	3	4	4	5	5	4	5	4	4
P11951;F1M733	7	7	492.6	0.957548	1.01374	Exercise	Control	Cytochrome c oxidase subunit 6C-2 OS=Rattus norvegicus GN=Cox6c2 PE=1 SV=3	7.75474e+07	7.8524e+07	7.14339e+07	7.73288e+07	8.43884e+07	9.67113e+07	7.67056e+07	9.35774e+07	6.40015e+07	1.17314e+08	8.69816e+07	7.22197e+07	8.29863e+07	8.81106e+07	7.80912e+07	7.55291e+07	8.54946e+07	6.89224e+07	5.94186e+07	6.88244e+07	7.27269e+07	7.26567e+07	7.73501e+07	7.67589e+07	5.31977e+07	1.01216e+08	7.44494e+07	7.89686e+07	8.29863e+07	1.05065e+08	7.99801e+07	7.35001e+07	7	5	7	5	7	7	7	7	8
D3ZYL4	1	1	86.1	0.957803	1.02202	Exercise	Control	Mitochondrial ribosomal protein L50 (Predicted) OS=Rattus norvegicus GN=Mrpl50 PE=4 SV=1	684380	534066	680324	574437	502177	377443	316107	507534	715311	706711	749788	353867	402255	547204	421140	372153	754516	468763	565892	511262	432782	283563	318763	416316	594562	609732	641760	386936	402255	652494	431327	362156	0	1	1	1	0	1	0	1	1
D3ZYM7	1	1	63.36	0.959668	1.00472	Control	Exercise	Protein LOC100363003 OS=Rattus norvegicus GN=LOC100363003 PE=4 SV=1	89287.5	129321	84311.4	112375	111003	129018	156810	194272	97279.4	81753.3	106264	102451	119392	196182	155506	142839	98437.8	113509	70130	100016	95664.1	96928.1	158128	159356	80858.1	70534.6	90953.2	112025	119392	233930	159267	139002	0	0	0	0	0	0	0	1	0
F1LP35	1	1	38.84	0.959909	1.05884	Control	Exercise	Acetyl-CoA carboxylase 1 OS=Rattus norvegicus GN=Acaca PE=4 SV=1	639969	623735	700290	917621	143567	381967	502302	459667	894314	307668	420270	779059	515308	371642	489586	348469	705554	547467	582499	816704	123727	286962	506522	377052	743348	265448	359718	851861	515308	443152	501429	339108	1	1	1	1	0	1	0	1	1
Q68FU7	7	7	553.81	0.962298	1.0043	Control	Exercise	Coenzyme Q6 homolog (Yeast) OS=Rattus norvegicus GN=Coq6 PE=2 SV=1	5.59899e+06	5.1083e+06	5.04545e+06	4.90637e+06	5.78674e+06	6.75979e+06	5.39064e+06	7.04414e+06	5.21511e+06	6.90357e+06	5.73534e+06	4.49825e+06	5.82666e+06	5.36538e+06	6.24802e+06	5.65271e+06	6.17279e+06	4.48368e+06	4.19679e+06	4.36679e+06	4.98708e+06	5.07845e+06	5.43593e+06	5.77811e+06	4.33477e+06	5.95621e+06	4.909e+06	4.91861e+06	5.82666e+06	6.39777e+06	6.39915e+06	5.50085e+06	7	6	8	7	7	7	5	6	5
G3V9N7	3	3	195.62	0.964931	1.00511	Control	Exercise	Protein Pacsin3 OS=Rattus norvegicus GN=Pacsin3 PE=4 SV=1	1.30144e+06	949477	1.47858e+06	1.19671e+06	1.58635e+06	1.41585e+06	1.1256e+06	1.25397e+06	1.35349e+06	1.20043e+06	1.64116e+06	1.17383e+06	1.2912e+06	1.24159e+06	1.38249e+06	971431	1.43482e+06	833380	1.22987e+06	1.0651e+06	1.36713e+06	1.06369e+06	1.13506e+06	1.0286e+06	1.12501e+06	1.0357e+06	1.4047e+06	1.28353e+06	1.2912e+06	1.48049e+06	1.41594e+06	945334	3	2	2	2	2	3	3	2	3
P11662	1	1	77.77	0.965301	1.06132	Control	Exercise	NADH-ubiquinone oxidoreductase chain 2 OS=Rattus norvegicus GN=Mtnd2 PE=2 SV=2	473002	287599	1.40312e+07	168256	62759.7	47949.1	215914	118853	455527	132902	1.30966e+07	264339	222587	212472	35865.9	95188.7	521476	252433	1.16711e+07	149752	54087.1	36022.9	217728	97491.9	378631	114665	1.12096e+07	289041	222587	253355	36733.4	92631.6	0	0	1	0	0	0	0	0	0
Q5RK08	11	11	634.76	0.965763	1.00426	Exercise	Control	Glioblastoma amplified sequence OS=Rattus norvegicus GN=Gbas PE=2 SV=1	6.77462e+07	7.11775e+07	6.51367e+07	5.24172e+07	5.86621e+07	7.35595e+07	7.3621e+07	7.31606e+07	5.33334e+07	7.29227e+07	5.50442e+07	6.29839e+07	7.06825e+07	7.35003e+07	9.05762e+07	5.87173e+07	7.46889e+07	6.24742e+07	5.41806e+07	4.66525e+07	5.05557e+07	5.52633e+07	7.42396e+07	6.00116e+07	4.43304e+07	6.29158e+07	4.71135e+07	6.88697e+07	7.06825e+07	8.76429e+07	9.27671e+07	5.714e+07	12	9	7	4	7	6	5	3	9
Q06C60	1	1	57.28	0.965915	1.02133	Exercise	Control	BolA-like 1 (E. coli) (Predicted) OS=Rattus norvegicus GN=Bola1 PE=2 SV=1	66672	72731.4	65322.7	83682.3	63951.6	53853.7	85100.3	59638	47749.9	76430.3	53382.9	75014.6	77139.3	105575	68330.1	59079.7	73504.7	63838.2	54335.2	74479.2	55114.2	40458.9	85815.3	48919.4	39689.4	65942.1	45691.6	82024.7	77139.3	125889	69982.9	57492.6	1	1	0	0	0	0	0	0	0
P07335	1	1	43.54	0.966566	1.02109	Control	Exercise	Creatine kinase B-type OS=Rattus norvegicus GN=Ckb PE=1 SV=2	227810	198373	295909	284810	262245	56244.4	283266	77112.9	235788	62657.6	90322.6	302004	189624	246044	161655	362851	251156	174117	246136	253488	226006	42255	285646	63253.6	195985	54059.3	77309	330226	189624	293387	165565	353104	0	0	0	1	0	0	0	0	0
D4A2V9	2	2	81.09	0.968852	1.20834	Control	Exercise	Glucose-6-phosphate isomerase OS=Rattus norvegicus GN=Gpi PE=3 SV=1	1.35488e+06	1.25425e+06	1.43269e+06	1.22605e+06	1.30281e+06	59495.1	855711	120921	1.81041e+06	236543	477062	1.32528e+06	586446	631973	303530	923998	1.49373e+06	1.10089e+06	1.1917e+06	1.09121e+06	1.12278e+06	44697.1	862900	99188.2	1.5048e+06	204083	408328	1.44913e+06	586446	753574	310872	899175	0	1	1	0	0	0	0	0	0
F8WFK6	2	2	89.23	0.96894	1.0033	Control	Exercise	Glutathione peroxidase OS=Rattus norvegicus GN=Gpx4 PE=3 SV=1	1.41213e+06	1.40636e+06	1.47675e+06	1.38066e+06	1.89628e+06	1.84342e+06	1.56545e+06	1.97989e+06	1.29885e+06	1.78358e+06	1.65752e+06	1.51439e+06	1.66264e+06	1.62553e+06	1.65253e+06	1.72333e+06	1.55685e+06	1.2344e+06	1.22836e+06	1.22882e+06	1.63423e+06	1.38491e+06	1.57861e+06	1.62404e+06	1.0796e+06	1.53882e+06	1.41871e+06	1.65591e+06	1.66264e+06	1.9383e+06	1.6925e+06	1.67704e+06	1	1	1	2	1	0	1	0	1
D3ZQ55	1	1	83.4	0.969619	1.0095	Control	Exercise	Junctophilin 1 (Predicted) OS=Rattus norvegicus GN=Jph1 PE=4 SV=1	132828	108285	151590	142669	120902	61967.4	109541	112062	132523	99577.3	145806	116704	131811	84060.6	125326	95193.4	146441	95044.8	126092	126979	104194	46554.5	110462	91921	110153	85912.7	124799	127610	131811	100235	128358	92636.2	1	0	1	1	0	0	1	1	1
B2RYS8	7	6	551.63	0.970443	1.00234	Exercise	Control	NADH dehydrogenase (Ubiquinone) 1 beta subcomplex 8 OS=Rattus norvegicus GN=Ndufb8 PE=2 SV=1	7.37923e+07	8.33736e+07	6.63911e+07	5.63824e+07	7.02717e+07	7.92494e+07	7.07859e+07	6.91704e+07	6.67012e+07	8.39397e+07	6.14145e+07	6.52991e+07	6.60985e+07	8.25023e+07	7.69417e+07	6.785e+07	8.13547e+07	7.31791e+07	5.5224e+07	5.01817e+07	6.0561e+07	5.9538e+07	7.13807e+07	5.67386e+07	5.54416e+07	7.2421e+07	5.2566e+07	7.14013e+07	6.60985e+07	9.8377e+07	7.88027e+07	6.60273e+07	6	5	7	6	4	5	5	5	6
P00406	8	2	553.92	0.972598	1.09148	Control	Exercise	Cytochrome c oxidase subunit 2 OS=Rattus norvegicus GN=Mtco2 PE=2 SV=2	1.58165e+06	1.57693e+06	2.0233e+08	1.51629e+06	1.34075e+06	1.88138e+06	1.73139e+06	1.79859e+06	1.7213e+06	1.8212e+06	1.83841e+08	1.51839e+06	1.56199e+06	2.16858e+06	1.51712e+06	1.69177e+06	1.74374e+06	1.38411e+06	1.68298e+08	1.34953e+06	1.15547e+06	1.41343e+06	1.74594e+06	1.47534e+06	1.43074e+06	1.57128e+06	1.57353e+08	1.66028e+06	1.56199e+06	2.58585e+06	1.55382e+06	1.64632e+06	0	0	6	0	0	0	0	0	0
D3ZTW7	2	2	117.73	0.973636	1.02221	Exercise	Control	ATP synthase mitochondrial F1 complex assembly factor 2 (Predicted), isoform CRA_c OS=Rattus norvegicus GN=Atpaf2 PE=4 SV=1	1.02173e+06	901505	791359	896751	853151	1.14633e+06	1.01061e+06	1.109e+06	890090	1.4535e+06	1.1747e+06	896401	942673	674186	776282	1.09427e+06	1.12643e+06	791274	658250	798130	735255	861209	1.0191e+06	909679	739837	1.25404e+06	1.00545e+06	980170	942673	803910	795059	1.06487e+06	0	1	1	1	0	0	0	1	0
P29418;F1LQM7	3	3	156.43	0.974342	1.00446	Control	Exercise	ATP synthase subunit epsilon, mitochondrial OS=Rattus norvegicus GN=Atp5e PE=1 SV=2	1.90277e+07	2.08367e+07	1.7785e+07	1.70067e+07	1.41007e+07	2.11749e+07	1.64627e+07	2.20432e+07	1.63321e+07	2.17221e+07	1.88716e+07	1.56694e+07	1.74804e+07	1.88454e+07	2.23278e+07	1.65304e+07	2.09777e+07	1.82889e+07	1.47935e+07	1.51364e+07	1.21522e+07	1.59081e+07	1.6601e+07	1.80814e+07	1.35752e+07	1.87412e+07	1.61526e+07	1.71337e+07	1.74804e+07	2.24716e+07	2.28679e+07	1.60863e+07	3	2	2	1	2	1	2	1	1
Q5XIH4	2	2	105.5	0.974582	1.02165	Control	Exercise	Lipoyl synthase, mitochondrial OS=Rattus norvegicus GN=Lias PE=2 SV=1	406689	371276	356054	411363	206438	490387	309235	590976	460529	487725	425746	238293	337579	333795	452707	339452	448368	325878	296165	366122	177911	368415	311833	484761	382789	420796	364405	260561	337579	398022	463658	330333	0	1	0	0	0	0	0	0	0
P63095	2	1	99.77	0.974896	1.00118	Exercise	Control	Guanine nucleotide-binding protein G(s) subunit alpha isoforms short OS=Rattus norvegicus GN=Gnas PE=1 SV=1	96658.6	134209	140989	67985.4	107041	115045	113981	119134	90557.1	104563	145836	102326	104741	147439	83921.2	116720	106564	117799	117274	60508.6	92248.9	86430.2	114939	97722	75270.5	90214	124825	111888	104741	175808	85951.1	113585	0	0	0	0	0	0	0	0	0
D3ZY68	2	2	89.97	0.97538	1.03609	Control	Exercise	Glutamyl-tRNA(Gln) amidotransferase subunit C, mitochondrial OS=Rattus norvegicus GN=Gatc PE=3 SV=1	750102	531806	458787	416095	472425	891549	542901	1.03868e+06	709038	766363	597577	441922	610276	669091	580431	549929	826973	466780	381617	370335	407141	669797	547463	852000	589348	661197	511479	483219	610276	797835	594470	535156	0	0	0	0	0	0	0	0	1
P24329;H7C5X0	13	13	893.1	0.975618	1.00599	Control	Exercise	Thiosulfate sulfurtransferase OS=Rattus norvegicus GN=Tst PE=1 SV=3	2.88015e+07	3.35807e+07	3.34588e+07	2.56181e+07	2.55848e+07	3.33318e+07	4.05934e+07	3.30974e+07	2.56026e+07	3.87484e+07	3.23039e+07	2.78984e+07	3.08974e+07	3.37814e+07	3.32039e+07	3.01168e+07	3.17531e+07	2.94746e+07	2.78309e+07	2.28007e+07	2.20493e+07	2.50413e+07	4.09345e+07	2.71489e+07	2.12807e+07	3.34311e+07	2.76496e+07	3.05055e+07	3.08974e+07	4.02814e+07	3.40071e+07	2.93077e+07	12	11	11	5	8	8	7	7	10
Q924S5	13	13	760.11	0.977641	1.0039	Exercise	Control	Lon protease homolog, mitochondrial OS=Rattus norvegicus GN=Lonp1 PE=2 SV=1	8.28211e+06	8.42439e+06	8.2072e+06	7.08784e+06	7.77061e+06	9.46001e+06	8.85437e+06	1.00621e+07	7.08883e+06	1.12319e+07	9.44645e+06	6.9708e+06	8.08934e+06	9.09415e+06	8.63034e+06	7.86253e+06	9.13088e+06	7.39429e+06	6.82673e+06	6.30834e+06	6.6968e+06	7.10706e+06	8.92877e+06	8.25368e+06	5.89219e+06	9.69058e+06	8.08542e+06	7.62222e+06	8.08934e+06	1.0844e+07	8.83909e+06	7.65132e+06	9	7	8	4	9	7	6	8	6
D3ZSA3;D3ZE88;D3ZS87;F1LMF3;F1LRK1;G3V8S4	24	16	1683.45	0.978101	1.01669	Control	Exercise	Sodium/potassium-transporting ATPase subunit alpha-2 OS=Rattus norvegicus GN=Atp1a2 PE=3 SV=1	1.59706e+07	1.53263e+07	1.43035e+07	1.43673e+07	1.82602e+07	2.55007e+07	1.77333e+07	1.42488e+07	1.522e+07	1.91044e+07	1.7366e+07	1.4341e+07	1.55959e+07	1.76478e+07	1.79475e+07	1.62608e+07	1.76073e+07	1.34523e+07	1.18976e+07	1.27873e+07	1.57369e+07	1.9158e+07	1.78823e+07	1.16879e+07	1.26507e+07	1.64828e+07	1.48639e+07	1.56811e+07	1.55959e+07	2.10435e+07	1.83816e+07	1.5824e+07	8	9	9	8	10	11	6	10	10
D3ZCZ9;G3V8B9;P52504	7	7	634.63	0.978248	1.0064	Exercise	Control	Protein LOC679739 OS=Rattus norvegicus GN=LOC679739 PE=4 SV=1	7.90844e+07	8.58456e+07	5.91013e+07	6.3997e+07	6.62851e+07	7.19466e+07	6.24302e+07	8.40014e+07	6.35002e+07	8.63211e+07	6.45014e+07	6.3102e+07	6.19511e+07	9.26705e+07	8.23624e+07	6.1948e+07	8.71891e+07	7.53489e+07	4.91603e+07	5.69589e+07	5.71253e+07	5.40516e+07	6.29547e+07	6.8904e+07	5.27809e+07	7.44756e+07	5.52081e+07	6.89989e+07	6.19511e+07	1.10502e+08	8.43546e+07	6.02838e+07	7	8	8	7	8	7	8	9	7
D3ZS58	6	6	350.9	0.979687	1.00343	Exercise	Control	NADH dehydrogenase [ubiquinone] 1 alpha subcomplex subunit 2 OS=Rattus norvegicus GN=Ndufa2 PE=3 SV=1	4.13757e+07	3.9794e+07	3.95966e+07	3.68669e+07	4.00504e+07	4.75928e+07	4.03122e+07	4.54829e+07	3.94828e+07	4.78895e+07	4.29298e+07	3.07222e+07	3.85003e+07	4.35437e+07	4.53144e+07	4.3823e+07	4.5616e+07	3.49281e+07	3.29363e+07	3.28124e+07	3.45159e+07	3.57553e+07	4.06509e+07	3.73083e+07	3.28179e+07	4.13178e+07	3.67445e+07	3.35932e+07	3.85003e+07	5.19222e+07	4.64105e+07	4.26457e+07	4	4	6	7	4	3	5	3	8
Q8HID0;Q8SEZ7	2	2	128.31	0.979812	1.00462	Control	Exercise	NADH-ubiquinone oxidoreductase chain 2 OS=Rattus norvegicus GN=Mt-nd2 PE=2 SV=1	8.94285e+06	6.27768e+06	499150	6.31669e+06	9.31389e+06	9.34756e+06	7.22197e+06	6.28722e+06	8.72072e+06	8.17336e+06	543626	6.59792e+06	7.58823e+06	9.09738e+06	6.80648e+06	6.42975e+06	9.85933e+06	5.51008e+06	415191	5.622e+06	8.02682e+06	7.02258e+06	7.28265e+06	5.15723e+06	7.24861e+06	7.05176e+06	465301	7.2145e+06	7.58823e+06	1.08479e+07	6.97111e+06	6.25702e+06	2	2	0	1	1	1	1	2	2
B4F789	1	1	41.68	0.983054	1.49375	Control	Exercise	Apolipoprotein B editing complex 2 (Predicted), isoform CRA_a OS=Rattus norvegicus GN=Apobec2 PE=2 SV=1	1.48057e+06	1.34806e+06	1.80381e+06	745096	1.61985e+06	39662.7	842783	61636.6	1.2461e+06	266938	279119	1.25434e+06	565563	612582	316695	775135	1.63231e+06	1.18323e+06	1.5004e+06	663153	1.39601e+06	29797.5	849864	50558.8	1.03575e+06	230307	238904	1.37156e+06	565563	730453	324355	754312	1	1	0	1	1	0	0	0	0
G3V8B0;D3ZEB1;P02564	80	12	6364.47	0.983816	1.02413	Control	Exercise	Myosin-7 OS=Rattus norvegicus GN=Myh7 PE=4 SV=1	2.281e+07	1.66521e+07	1.86254e+07	2.46296e+07	2.23249e+07	7.64886e+06	1.66302e+07	8.20826e+06	2.42032e+07	1.09491e+07	1.03506e+07	2.7588e+07	1.73267e+07	1.30851e+07	1.25464e+07	1.82396e+07	2.51476e+07	1.4616e+07	1.54926e+07	2.19209e+07	1.92399e+07	5.74639e+06	1.67699e+07	6.73301e+06	2.01175e+07	9.44655e+06	8.85927e+06	3.01661e+07	1.73267e+07	1.56028e+07	1.28499e+07	1.77496e+07	9	6	9	9	6	4	10	6	10
Q5XIF3	9	9	618.21	0.98473	1.00622	Exercise	Control	NADH dehydrogenase [ubiquinone] iron-sulfur protein 4, mitochondrial OS=Rattus norvegicus GN=Ndufs4 PE=1 SV=1	9.02403e+07	8.98812e+07	7.5923e+07	7.08807e+07	9.52209e+07	1.04706e+08	8.83357e+07	8.72581e+07	8.22501e+07	1.07183e+08	7.73478e+07	7.09061e+07	8.26572e+07	1.05565e+08	1.02363e+08	7.85422e+07	9.94883e+07	7.8891e+07	6.31526e+07	6.30855e+07	8.20625e+07	7.86626e+07	8.90778e+07	7.15754e+07	6.83658e+07	9.24748e+07	6.62037e+07	7.75322e+07	8.26572e+07	1.25877e+08	1.04839e+08	7.64323e+07	11	9	10	10	12	11	11	12	9
D3ZKG1;D3ZFD5	18	18	1356.49	0.985313	1.0047	Control	Exercise	Protein LOC100361295 OS=Rattus norvegicus GN=LOC100361295 PE=4 SV=1	3.67941e+07	3.80845e+07	3.15143e+07	3.00669e+07	3.90448e+07	4.39018e+07	3.40169e+07	4.20501e+07	3.57493e+07	4.40607e+07	3.42148e+07	3.66642e+07	4.00723e+07	3.64282e+07	3.35979e+07	3.33032e+07	4.05648e+07	3.34277e+07	2.62135e+07	2.67603e+07	3.36493e+07	3.29823e+07	3.43027e+07	3.44925e+07	2.97146e+07	3.80144e+07	2.92852e+07	4.00904e+07	4.00723e+07	4.34375e+07	3.44106e+07	3.24085e+07	15	12	8	12	12	12	14	11	13
F1LTJ5;F1M566	5	5	216.49	0.986219	1.04773	Exercise	Control	Uncharacterized protein (Fragment) OS=Rattus norvegicus PE=4 SV=1	421771	425067	685194	624629	752756	924547	443698	455263	1.02399e+06	327213	543340	403586	391688	658558	498128	1.11231e+06	464995	373092	569942	555934	648734	694588	447426	373439	851131	282311	465056	441301	391688	785275	510177	1.08243e+06	0	0	1	0	0	1	0	0	1
D3ZPZ9	1	1	44.31	0.986901	1.04347	Control	Exercise	RCG23940, isoform CRA_g OS=Rattus norvegicus GN=Mff PE=4 SV=1	845643	495636	293259	287616	293375	551657	326754	505214	698575	415340	418708	349803	349089	478947	345175	393565	932306	435032	243932	255985	252834	414445	329499	414413	580652	358344	358382	382492	349089	571104	353524	382992	0	1	0	0	0	0	0	1	0
D4A4M6	3	2	262.9	0.986938	1.01187	Exercise	Control	Protein Opa3 OS=Rattus norvegicus GN=Opa3 PE=4 SV=1	1.48475e+06	1.52368e+06	1.56509e+06	1.21543e+06	1.49304e+06	2.02705e+06	1.49868e+06	2.23333e+06	1.53143e+06	1.62971e+06	2.03956e+06	912050	1.51084e+06	1.62234e+06	2.07908e+06	1.87091e+06	1.63691e+06	1.33738e+06	1.30184e+06	1.08176e+06	1.28672e+06	1.52287e+06	1.51128e+06	1.83194e+06	1.27291e+06	1.40607e+06	1.7457e+06	997280	1.51084e+06	1.93451e+06	2.12937e+06	1.82065e+06	2	2	1	2	2	2	1	1	1
P97519;D4A5C3	6	6	370.86	0.98767	1.00043	Exercise	Control	Hydroxymethylglutaryl-CoA lyase, mitochondrial OS=Rattus norvegicus GN=Hmgcl PE=2 SV=1	5.42057e+06	5.86521e+06	4.58484e+06	4.37344e+06	4.0633e+06	5.44684e+06	5.99779e+06	6.43645e+06	4.24678e+06	6.60963e+06	4.86313e+06	4.7361e+06	5.29942e+06	5.99172e+06	5.97098e+06	4.48895e+06	5.97608e+06	5.14804e+06	3.81365e+06	3.89247e+06	3.5018e+06	4.09207e+06	6.04819e+06	5.27964e+06	3.5299e+06	5.70261e+06	4.16245e+06	5.17868e+06	5.29942e+06	7.14462e+06	6.11541e+06	4.36836e+06	3	3	1	3	1	2	3	3	2
Q8HIC9	1	1	49.85	0.988918	1.00035	Exercise	Control	Cytochrome c oxidase subunit 1 OS=Rattus norvegicus GN=Mt-co1 PE=2 SV=1	1.19145e+06	1.2655e+06	1.08074e+06	919660	915770	1.06922e+06	1.27603e+06	1.69868e+06	1.27503e+06	1.4471e+06	1.01587e+06	923228	1.1107e+06	1.51942e+06	1.24241e+06	886610	1.31356e+06	1.11076e+06	898953	818519	789222	803278	1.28675e+06	1.39338e+06	1.0598e+06	1.24852e+06	869507	1.0095e+06	1.1107e+06	1.81178e+06	1.27246e+06	862792	0	0	0	0	0	0	0	0	0
A9UMV9	5	5	278.88	0.990814	1.00296	Exercise	Control	Ndufa7 protein OS=Rattus norvegicus GN=Ndufa7 PE=4 SV=1	1.77679e+07	1.56328e+07	1.44179e+07	1.62732e+07	1.45036e+07	2.16566e+07	1.55717e+07	2.22415e+07	1.32039e+07	2.29981e+07	1.874e+07	1.55591e+07	1.5376e+07	1.88403e+07	1.93602e+07	1.43957e+07	1.95888e+07	1.37213e+07	1.19928e+07	1.44836e+07	1.24994e+07	1.62701e+07	1.57026e+07	1.82441e+07	1.0975e+07	1.98422e+07	1.604e+07	1.70131e+07	1.5376e+07	2.24654e+07	1.98285e+07	1.4009e+07	2	3	3	2	3	3	4	2	3
Q5RJN0;D4ADX5	11	11	860.4	0.991084	1.00383	Control	Exercise	NADH dehydrogenase (Ubiquinone) Fe-S protein 7 OS=Rattus norvegicus GN=Ndufs7 PE=2 SV=1	1.1892e+08	1.14175e+08	1.09834e+08	6.26041e+07	1.12916e+08	1.08001e+08	1.06303e+08	8.22487e+07	1.29336e+08	1.09065e+08	7.37095e+07	1.03282e+08	9.76259e+07	1.22785e+08	9.76059e+07	7.84808e+07	1.31107e+08	1.00215e+08	9.13594e+07	5.57191e+07	9.73125e+07	8.11381e+07	1.07196e+08	6.74663e+07	1.07503e+08	9.40986e+07	6.30895e+07	1.12934e+08	9.76259e+07	1.46411e+08	9.99668e+07	7.63725e+07	14	13	15	15	20	15	12	16	16
Q6P9Y4;D3ZB81;D4A2A1;F1LXE6;Q05962	27	14	2014.74	0.991294	1.00377	Control	Exercise	ADP/ATP translocase 1 OS=Rattus norvegicus GN=Slc25a4 PE=2 SV=1	1.17762e+09	1.14793e+09	1.06113e+09	8.87674e+08	9.74997e+08	1.37928e+09	9.89839e+08	1.15081e+09	1.10513e+09	1.30081e+09	1.06681e+09	9.46021e+08	1.08122e+09	1.13367e+09	1.10318e+09	9.9947e+08	1.2983e+09	1.00757e+09	8.82644e+08	7.90051e+08	8.40264e+08	1.03621e+09	9.98156e+08	9.43976e+08	9.18578e+08	1.12231e+09	9.13105e+08	1.03443e+09	1.08122e+09	1.35181e+09	1.12986e+09	9.72621e+08	23	23	19	18	16	20	18	25	20
P03889;H9KVF8	4	3	179.99	0.991796	1.00652	Control	Exercise	NADH-ubiquinone oxidoreductase chain 1 OS=Rattus norvegicus GN=Mtnd1 PE=1 SV=2	1.76832e+07	1.57402e+07	1.29027e+07	1.40844e+07	1.58705e+07	2.2273e+07	1.69786e+07	2.25884e+07	1.52068e+07	1.82818e+07	1.46182e+07	1.39438e+07	1.5497e+07	2.00314e+07	2.03427e+07	1.93052e+07	1.94954e+07	1.38156e+07	1.07324e+07	1.25354e+07	1.36774e+07	1.67331e+07	1.71213e+07	1.85286e+07	1.26398e+07	1.57731e+07	1.2512e+07	1.52468e+07	1.5497e+07	2.38857e+07	2.08348e+07	1.87865e+07	3	1	1	1	1	1	2	2	0
Q8SEZ5	7	1	526.94	0.9918	1.01075	Exercise	Control	Cytochrome c oxidase subunit 2 OS=Rattus norvegicus GN=Mt-co2 PE=3 SV=1	2.18603e+08	2.23333e+08	1.03625e+06	1.76432e+08	1.55469e+08	1.92832e+08	2.06522e+08	2.07976e+08	1.7504e+08	2.88137e+08	1.13673e+06	1.72865e+08	1.87608e+08	2.33327e+08	1.59346e+08	1.796e+08	2.41006e+08	1.96025e+08	861947	1.57029e+08	1.33985e+08	1.4487e+08	2.08257e+08	1.70597e+08	1.45492e+08	2.48597e+08	972950	1.89019e+08	1.87608e+08	2.78223e+08	1.632e+08	1.74775e+08	3	3	0	5	4	3	4	5	4
P48500	8	8	565.38	0.992521	1.03751	Control	Exercise	Triosephosphate isomerase OS=Rattus norvegicus GN=Tpi1 PE=1 SV=2	1.8391e+07	1.56156e+07	1.57711e+07	1.36491e+07	1.68032e+07	6.19031e+06	1.17331e+07	6.35062e+06	1.93923e+07	8.49378e+06	1.00879e+07	1.54711e+07	1.09931e+07	1.28151e+07	9.83687e+06	1.36354e+07	2.02758e+07	1.37062e+07	1.31184e+07	1.2148e+07	1.44812e+07	4.65062e+06	1.18317e+07	5.20923e+06	1.61187e+07	7.32821e+06	8.63443e+06	1.69169e+07	1.09931e+07	1.5281e+07	1.00748e+07	1.32691e+07	6	5	6	5	6	0	3	1	7
Q9ES40	1	1	40.52	0.993796	1.01164	Exercise	Control	PRA1 family protein 3 OS=Rattus norvegicus GN=Arl6ip5 PE=1 SV=1	240210	383912	317264	392729	295172	312635	343294	217377	399680	332678	264613	424202	275487	391715	202038	241319	264828	336969	263899	349538	254382	234874	346178	178308	332211	287026	226488	463844	275487	467087	206925	234836	0	1	0	1	0	0	0	0	0
Q5I0M1;P26644	9	8	519.72	0.994282	1.00234	Exercise	Control	Apolipoprotein H OS=Rattus norvegicus GN=Apoh PE=2 SV=1	8.83937e+06	1.03075e+07	1.00051e+07	8.36063e+06	1.15403e+07	1.28603e+07	1.00503e+07	9.96328e+06	1.06749e+07	1.27604e+07	1.12316e+07	9.61048e+06	1.10564e+07	8.57331e+06	7.96447e+06	1.02467e+07	9.74524e+06	9.04716e+06	8.32221e+06	7.44116e+06	9.94555e+06	9.6616e+06	1.01347e+07	8.1726e+06	8.87288e+06	1.10093e+07	9.61333e+06	1.05086e+07	1.10564e+07	1.0223e+07	8.15712e+06	9.97144e+06	4	4	5	3	3	4	3	4	5
D4A8Y8	1	1	49.83	0.994335	1.0479	Control	Exercise	HIG1 domain family member 1A OS=Rattus norvegicus GN=Higd1a PE=4 SV=1	598847	399662	332805	225707	465571	281425	193218	249471	452019	422495	275518	348969	252524	299411	300495	269729	660218	350794	276827	200885	401235	211427	194842	204634	375716	364518	235822	381580	252524	357022	307763	262483	1	0	0	0	0	0	0	0	0
Q6GMM8	1	1	44.36	0.994494	1.06942	Control	Exercise	Long-chain fatty acid transport protein 1 OS=Rattus norvegicus GN=Slc27a1 PE=2 SV=1	143404	66294.4	122293	135765	186594	210336	95715.6	75224.2	126550	109674	118398	141677	128624	101148	112319	130009	158100	58188.2	101723	120834	160809	158020	96519.8	61704.4	105188	94624	101339	154916	128624	120610	115036	126517	0	0	0	0	0	0	0	0	0
P14408;Q5M964	25	24	1766.94	0.994803	1.00689	Exercise	Control	Fumarate hydratase, mitochondrial OS=Rattus norvegicus GN=Fh PE=1 SV=1	2.86952e+08	3.41796e+08	3.2729e+08	2.69919e+08	3.12689e+08	3.737e+08	3.02388e+08	3.10508e+08	2.44139e+08	3.97835e+08	3.15884e+08	2.56862e+08	3.25729e+08	3.53147e+08	3.53296e+08	2.95743e+08	3.16359e+08	3.00003e+08	2.72239e+08	2.40234e+08	2.69479e+08	2.80751e+08	3.04928e+08	2.54701e+08	2.02927e+08	3.43241e+08	2.70372e+08	2.80866e+08	3.25729e+08	4.21098e+08	3.61842e+08	2.87798e+08	27	29	26	23	22	25	21	23	22
F1LMC6	1	1	39.39	0.994852	1.44867	Control	Exercise	Troponin I, slow skeletal muscle (Fragment) OS=Rattus norvegicus GN=Tnni1 PE=4 SV=1	77139.5	100676	95563	94429.2	96529	8089.64	94662.2	1209.4	89852	11671.2	17774.2	94619.2	50040.4	42320.6	32292.5	53718.8	85044.9	88365.9	79489	84044.2	83189.9	6077.54	95457.5	992.038	74684.4	10069.6	15213.3	103461	50040.4	50463.7	33073.6	52275.7	0	0	0	1	0	0	0	0	0
D3ZQB6	2	2	112.54	0.995931	1.03406	Exercise	Control	Cat eye syndrome chromosome region, candidate 5 homolog (Human) (Predicted) OS=Rattus norvegicus GN=Cecr5 PE=4 SV=1	626611	601343	562413	647267	787015	602102	714031	709266	518394	1.18789e+06	658410	682601	554704	695202	667556	464107	690827	527814	467813	576083	678258	452343	720030	581791	430886	1.02488e+06	563547	746390	554704	828969	683703	451639	1	1	1	1	1	1	1	1	1
Q641Y2;D3ZBB9	22	22	1604.78	0.996058	1.00022	Control	Exercise	NADH dehydrogenase [ubiquinone] iron-sulfur protein 2, mitochondrial OS=Rattus norvegicus GN=Ndufs2 PE=1 SV=1	2.47692e+08	2.39464e+08	2.25645e+08	2.13973e+08	2.55743e+08	2.91972e+08	2.29524e+08	2.63193e+08	2.29814e+08	2.85683e+08	2.31718e+08	2.10406e+08	2.42214e+08	2.57808e+08	2.72071e+08	2.37064e+08	2.73076e+08	2.10183e+08	1.87691e+08	1.90441e+08	2.20403e+08	2.19351e+08	2.31453e+08	2.1589e+08	1.9102e+08	2.4648e+08	1.98333e+08	2.30068e+08	2.42214e+08	3.07414e+08	2.78652e+08	2.30696e+08	23	25	19	25	23	26	22	23	25
P12075	7	7	391.75	0.996729	1.00658	Exercise	Control	Cytochrome c oxidase subunit 5B, mitochondrial OS=Rattus norvegicus GN=Cox5b PE=1 SV=2	1.40307e+08	1.49384e+08	1.37307e+08	1.46743e+08	1.41557e+08	1.56415e+08	1.41299e+08	1.87251e+08	1.22821e+08	2.0139e+08	1.71531e+08	1.38004e+08	1.37196e+08	1.53704e+08	1.45599e+08	1.37918e+08	1.54686e+08	1.31118e+08	1.14212e+08	1.30605e+08	1.21995e+08	1.17511e+08	1.42486e+08	1.53597e+08	1.02088e+08	1.73754e+08	1.46817e+08	1.50901e+08	1.37196e+08	1.83279e+08	1.49121e+08	1.34213e+08	10	9	8	7	6	9	7	7	10
D3Z9R8	1	1	42.59	0.997131	1.00971	Exercise	Control	6.8 kDa mitochondrial proteolipid OS=Rattus norvegicus GN=Mp68 PE=1 SV=1	510372	436281	476552	486805	743918	671870	277340	179086	279655	560419	439699	900009	634393	459618	326429	218708	562675	382934	396394	433268	641117	504758	279671	146899	232448	483515	376348	984114	634393	548056	334325	212833	1	0	0	0	0	1	0	0	0
D3Z9M8;D3Z7Y6;D4A931;Q63279;Q6IFV0;Q6IFV3;Q6IFV4	7	0	401			---	---	Keratin, type I cytoskeletal 14 OS=Rattus norvegicus GN=Krt14 PE=3 SV=1																	0	0	0	0	0	0	0	0	0	0	0	0	0	0	0	0	0	0	0	0	0	0	0	0	0
F1LV63	2	0	168.1			---	---	Uncharacterized protein (Fragment) OS=Rattus norvegicus PE=4 SV=1																	0	0	0	0	0	0	0	0	0	0	0	0	0	0	0	0	0	0	0	0	0	0	0	0	0
D4A0Q2	2	0	69.25			---	---	Enolase OS=Rattus norvegicus PE=3 SV=1																	0	0	0	0	0	0	0	0	0	0	0	0	0	0	0	0	0	0	0	0	0	0	0	0	0
P04462	20	0	1846.7			---	---	Myosin-8 (Fragment) OS=Rattus norvegicus GN=Myh8 PE=2 SV=1																	0	0	0	0	0	0	0	0	0	0	0	0	0	0	0	0	0	0	0	0	0	0	0	0	0
P17209	2	0	125.28			---	---	Myosin light chain 4 OS=Rattus norvegicus GN=Myl4 PE=2 SV=2																	0	0	0	0	0	0	0	0	0	0	0	0	0	0	0	0	0	0	0	0	0	0	0	0	0
F1LRC1	6	0	307.03			---	---	Keratin, type II cytoskeletal 73 OS=Rattus norvegicus GN=Krt73 PE=3 SV=1																	0	0	0	0	0	0	0	0	0	0	0	0	0	0	0	0	0	0	0	0	0	0	0	0	0
Q5U1Y4	1	0	41.05			---	---	1,5-anhydro-D-fructose reductase OS=Rattus norvegicus GN=Akr1e2 PE=2 SV=1																	0	0	0	0	0	0	0	0	0	0	0	0	0	0	0	0	0	0	0	0	0	0	0	0	0
G3V908;F1LSI8	6	0	307.92			---	---	Protein Kb15 OS=Rattus norvegicus GN=Kb15 PE=3 SV=1																	0	0	0	0	0	0	0	0	0	0	0	0	0	0	0	0	0	0	0	0	0	0	0	0	0
F1MAF7;D3ZC29;D3ZDZ4;Q6IFW0	7	0	355.64			---	---	Protein Krt31 OS=Rattus norvegicus GN=Krt31 PE=3 SV=1																	0	0	0	0	0	0	0	0	0	0	0	0	0	0	0	0	0	0	0	0	0	0	0	0	0
F1M8F6	86	0	7907.03			---	---	Myosin-8 OS=Rattus norvegicus GN=Myh8 PE=4 SV=1																	0	0	0	0	0	0	0	0	0	0	0	0	0	0	0	0	0	0	0	0	0	0	0	0	0
D3ZD92	3	0	139.03			---	---	Long-chain-fatty-acid--CoA ligase 6 OS=Rattus norvegicus GN=Acsl6 PE=4 SV=1																	0	0	0	0	0	0	0	0	0	0	0	0	0	0	0	0	0	0	0	0	0	0	0	0	0
G3V885	64	0	5141.26			---	---	Myosin-6 OS=Rattus norvegicus GN=Myh6 PE=4 SV=1																	0	0	0	0	0	0	0	0	0	0	0	0	0	0	0	0	0	0	0	0	0	0	0	0	0
P09495	13	0	749.34			---	---	Tropomyosin alpha-4 chain OS=Rattus norvegicus GN=Tpm4 PE=1 SV=3																	0	0	0	0	0	0	0	0	0	0	0	0	0	0	0	0	0	0	0	0	0	0	0	0	0
F1LLZ7	1	0	40.5			---	---	Phosphorylase b kinase regulatory subunit alpha, skeletal muscle isoform OS=Rattus norvegicus GN=Phka1 PE=4 SV=1																	0	0	0	0	0	0	0	0	0	0	0	0	0	0	0	0	0	0	0	0	0	0	0	0	0
P02563	63	0	5106.83			---	---	Myosin-6 OS=Rattus norvegicus GN=Myh6 PE=2 SV=2																	0	0	0	0	0	0	0	0	0	0	0	0	0	0	0	0	0	0	0	0	0	0	0	0	0
G3V8C1	1	0	39.36			---	---	A/G-specific adenine DNA glycosylase OS=Rattus norvegicus GN=Mutyh PE=4 SV=1																	0	0	0	0	0	0	0	0	0	0	0	0	0	0	0	0	0	0	0	0	0	0	0	0	0
D4A882	16	0	844.6			---	---	Propionyl-CoA carboxylase alpha chain, mitochondrial OS=Rattus norvegicus GN=Pcca PE=4 SV=1																	0	0	0	0	0	0	0	0	0	0	0	0	0	0	0	0	0	0	0	0	0	0	0	0	0
D4A111	1	0	64.41			---	---	Procollagen, type VI, alpha 3 (Predicted), isoform CRA_a OS=Rattus norvegicus GN=Col6a3 PE=4 SV=1																	0	0	0	0	0	0	0	0	0	0	0	0	0	0	0	0	0	0	0	0	0	0	0	0	0
Q63610	15	0	770.85			---	---	Tropomyosin alpha-3 chain OS=Rattus norvegicus GN=Tpm3 PE=1 SV=2																	0	0	0	0	0	0	0	0	0	0	0	0	0	0	0	0	0	0	0	0	0	0	0	0	0
D3ZRC4	1	0	51.58			---	---	Similar to intracellular membrane-associated calcium-independent phospholipase A2 gamma (Predicted), isoform CRA_b OS=Rattus norvegicus GN=RGD1311444_predicted PE=4 SV=1																	0	0	0	0	0	0	0	0	0	0	0	0	0	0	0	0	0	0	0	0	0	0	0	0	0
F1M2V3	1	0	142.79			---	---	Uncharacterized protein (Fragment) OS=Rattus norvegicus PE=3 SV=1																	0	0	0	0	0	0	0	0	0	0	0	0	0	0	0	0	0	0	0	0	0	0	0	0	0
D3ZBM5;P18596	12	0	1224.92			---	---	Sarcoplasmic/endoplasmic reticulum calcium ATPase 3 OS=Rattus norvegicus GN=Atp2a3 PE=3 SV=1																	0	0	0	0	0	0	0	0	0	0	0	0	0	0	0	0	0	0	0	0	0	0	0	0	0
Q10758	3	0	196.43			---	---	Keratin, type II cytoskeletal 8 OS=Rattus norvegicus GN=Krt8 PE=1 SV=3																	0	0	0	0	0	0	0	0	0	0	0	0	0	0	0	0	0	0	0	0	0	0	0	0	0
P05708	3	0	151.26			---	---	Hexokinase-1 OS=Rattus norvegicus GN=Hk1 PE=1 SV=4																	0	0	0	0	0	0	0	0	0	0	0	0	0	0	0	0	0	0	0	0	0	0	0	0	0
F1M8L5	13	0	646.42			---	---	Propionyl-CoA carboxylase alpha chain, mitochondrial (Fragment) OS=Rattus norvegicus GN=Pcca PE=4 SV=1																	0	0	0	0	0	0	0	0	0	0	0	0	0	0	0	0	0	0	0	0	0	0	0	0	0
F1M789	40	0	2875.86			---	---	Protein Myh13 (Fragment) OS=Rattus norvegicus GN=Myh13 PE=4 SV=1																	0	0	0	0	0	0	0	0	0	0	0	0	0	0	0	0	0	0	0	0	0	0	0	0	0
Q5M9G9	1	0	40.04			---	---	Protein TBRG4 OS=Rattus norvegicus GN=Tbrg4 PE=2 SV=1																	0	0	0	0	0	0	0	0	0	0	0	0	0	0	0	0	0	0	0	0	0	0	0	0	0
Q6IG05	7	0	395.2			---	---	Keratin, type II cytoskeletal 75 OS=Rattus norvegicus GN=Krt75 PE=2 SV=2																	0	0	0	0	0	0	0	0	0	0	0	0	0	0	0	0	0	0	0	0	0	0	0	0	0
Q6IFU7	5	0	263.79			---	---	Keratin, type I cytoskeletal 42 OS=Rattus norvegicus GN=Krt42 PE=2 SV=1																	0	0	0	0	0	0	0	0	0	0	0	0	0	0	0	0	0	0	0	0	0	0	0	0	0
F1LUV4	4	0	207.92			---	---	Uncharacterized protein (Fragment) OS=Rattus norvegicus PE=3 SV=1																	0	0	0	0	0	0	0	0	0	0	0	0	0	0	0	0	0	0	0	0	0	0	0	0	0
G3V7I5	3	0	127.32			---	---	Aldehyde dehydrogenase X, mitochondrial OS=Rattus norvegicus GN=Aldh1b1 PE=3 SV=1																	0	0	0	0	0	0	0	0	0	0	0	0	0	0	0	0	0	0	0	0	0	0	0	0	0
[truncated: 8 more columns]

## Sheet: =>3 Quant peptides
Accession	Peptide count	Peptides used for quantitation	Confidence score	Anova (p)	Max fold change	Highest mean condition	Lowest mean condition	Description	Average abundance (C+E)	C1_mito	C2_mito_140925053842	C3_mito	C4_mito	C5_mito	C6_mito	C7_mito	C8_mito	E1_mito	E2_mito	E3_mito	E5_mito	E6_mito	E7_mito	E9_mito	E10_mito	C1_mito	C2_mito_140925053842	C3_mito	C4_mito	C5_mito	C6_mito	C7_mito	C8_mito	E1_mito	E2_mito	E3_mito	E5_mito	E6_mito	E7_mito	E9_mito	E10_mito	C1_mito	C2_mito_140925053842	C3_mito	C4_mito	C5_mito	C6_mito	C7_mito	C8_mito
G3V6D3	33	33	3632.4	0.837436	1.01142	Exercise	Control	ATP synthase subunit beta OS=Rattus norvegicus GN=Atp5b PE=3 SV=1	5.2652e+09	4.99646e+09	5.48663e+09	4.71312e+09	4.12107e+09	4.9558e+09	6.30248e+09	5.00493e+09	6.30192e+09	4.45234e+09	6.40511e+09	5.39682e+09	4.45061e+09	5.10579e+09	5.60296e+09	5.62525e+09	5.32187e+09	5.5085e+09	4.81576e+09	3.92036e+09	3.66785e+09	4.27096e+09	4.73489e+09	5.04698e+09	5.16929e+09	3.70075e+09	5.52616e+09	4.61925e+09	4.86652e+09	5.10579e+09	6.68105e+09	5.76132e+09	5.17891e+09	95	95	91	95	90	91	94	96
P04636	22	21	2103.35	0.182635	1.06875	Exercise	Control	Malate dehydrogenase, mitochondrial OS=Rattus norvegicus GN=Mdh2 PE=1 SV=2	4.61509e+09	4.70068e+09	4.51337e+09	4.61434e+09	4.09993e+09	3.98462e+09	4.87806e+09	4.03477e+09	4.8679e+09	4.45449e+09	5.60192e+09	4.95043e+09	4.02831e+09	4.49265e+09	4.61084e+09	5.14873e+09	4.86034e+09	5.18242e+09	3.9615e+09	3.8382e+09	3.64903e+09	3.43399e+09	3.66476e+09	4.06867e+09	3.99301e+09	3.70254e+09	4.83319e+09	4.23718e+09	4.40476e+09	4.49265e+09	5.49804e+09	5.27327e+09	4.72977e+09	60	65	59	57	52	57	57	58
P15999;F1LP05	44	43	3924.25	0.370681	1.05352	Exercise	Control	ATP synthase subunit alpha, mitochondrial OS=Rattus norvegicus GN=Atp5a1 PE=1 SV=2	3.78447e+09	3.57058e+09	3.84883e+09	3.57777e+09	3.19238e+09	3.12855e+09	4.08976e+09	3.58136e+09	4.49743e+09	3.39423e+09	4.488e+09	3.8822e+09	3.37194e+09	3.70575e+09	4.08932e+09	4.4382e+09	3.69518e+09	3.93649e+09	3.37822e+09	2.97598e+09	2.84129e+09	2.69622e+09	3.07253e+09	3.61145e+09	3.68912e+09	2.82127e+09	3.87213e+09	3.32286e+09	3.68705e+09	3.70575e+09	4.87616e+09	4.54555e+09	3.59591e+09	90	96	92	89	93	108	111	117
D3ZCV0	70	45	6801.58	0.00529549	1.52946	Control	Exercise	Protein Actn2 OS=Rattus norvegicus GN=Actn2 PE=4 SV=1	1.78188e+09	1.88977e+09	1.94383e+09	2.01557e+09	2.20749e+09	3.3608e+09	2.66083e+09	1.82221e+09	1.33841e+09	1.80779e+09	1.11527e+09	1.08418e+09	1.86843e+09	1.61165e+09	1.09696e+09	1.21581e+09	1.47114e+09	2.08344e+09	1.70615e+09	1.67655e+09	1.96472e+09	2.89638e+09	1.99901e+09	1.83752e+09	1.09786e+09	1.50262e+09	9.62226e+08	9.27977e+08	2.04303e+09	1.61165e+09	1.30804e+09	1.24522e+09	1.43162e+09	82	74	81	81	93	82	78	64
F1M0K2	47	44	4223.31	0.474502	1.04509	Exercise	Control	Aconitate hydratase, mitochondrial (Fragment) OS=Rattus norvegicus GN=Aco2 PE=4 SV=1	1.5696e+09	1.48639e+09	1.51759e+09	1.50917e+09	1.38666e+09	1.32218e+09	1.85145e+09	1.42254e+09	1.78399e+09	1.35192e+09	1.8783e+09	1.63977e+09	1.40738e+09	1.49845e+09	1.68918e+09	1.85195e+09	1.51675e+09	1.63872e+09	1.33203e+09	1.25532e+09	1.23416e+09	1.13947e+09	1.39094e+09	1.43449e+09	1.46336e+09	1.1237e+09	1.62055e+09	1.40352e+09	1.5389e+09	1.49845e+09	2.01421e+09	1.89674e+09	1.47601e+09	74	73	77	67	71	79	74	81
P00507;F1LXI9;F1LZD6	26	25	2178.28	0.526281	1.0299	Exercise	Control	Aspartate aminotransferase, mitochondrial OS=Rattus norvegicus GN=Got2 PE=1 SV=2	1.51388e+09	1.55361e+09	1.58151e+09	1.43193e+09	1.30302e+09	1.41073e+09	1.61303e+09	1.43724e+09	1.60152e+09	1.39471e+09	1.78357e+09	1.62658e+09	1.36268e+09	1.41526e+09	1.55207e+09	1.664e+09	1.49056e+09	1.71283e+09	1.38813e+09	1.19107e+09	1.15972e+09	1.21579e+09	1.21182e+09	1.44932e+09	1.31368e+09	1.15927e+09	1.53881e+09	1.39223e+09	1.49002e+09	1.41526e+09	1.85072e+09	1.70424e+09	1.45052e+09	56	51	55	46	48	51	53	57
Q8R4I6	71	49	6876.25	0.184348	1.2375	Control	Exercise	Actinin alpha 3, isoform CRA_a OS=Rattus norvegicus GN=Actn3 PE=2 SV=1	1.38704e+09	1.32932e+09	1.53046e+09	1.99017e+09	1.54938e+09	2.34512e+09	1.19772e+09	1.44343e+09	8.88588e+08	1.96103e+09	6.2821e+08	1.06506e+09	1.59365e+09	1.31201e+09	1.19127e+09	9.51519e+08	1.21574e+09	1.46555e+09	1.34332e+09	1.65542e+09	1.37898e+09	2.02105e+09	8.99815e+08	1.45556e+09	7.28884e+08	1.63e+09	5.42003e+08	9.1161e+08	1.74258e+09	1.31201e+09	1.42049e+09	9.74535e+08	1.18308e+09	77	85	86	86	98	78	88	68
P56574;F1LRD5	34	33	2506.25	0.858507	1.02686	Exercise	Control	Isocitrate dehydrogenase [NADP], mitochondrial OS=Rattus norvegicus GN=Idh2 PE=1 SV=2	1.30685e+09	1.22004e+09	1.41129e+09	1.00861e+09	9.94969e+08	1.12441e+09	1.73913e+09	1.1057e+09	1.71216e+09	7.61173e+08	1.75092e+09	1.05423e+09	1.23296e+09	1.46328e+09	1.47639e+09	1.43419e+09	1.42023e+09	1.34507e+09	1.23872e+09	8.38963e+08	8.85546e+08	9.69033e+08	1.30656e+09	1.11499e+09	1.40444e+09	6.32683e+08	1.51064e+09	9.02339e+08	1.34818e+09	1.46328e+09	1.76047e+09	1.46888e+09	1.38207e+09	48	48	49	44	45	52	44	56
Q6P9Y4;D3ZB81;D4A2A1;F1LXE6;Q05962	27	14	2014.74	0.991294	1.00377	Control	Exercise	ADP/ATP translocase 1 OS=Rattus norvegicus GN=Slc25a4 PE=2 SV=1	1.0941e+09	1.17762e+09	1.14793e+09	1.06113e+09	8.87674e+08	9.74997e+08	1.37928e+09	9.89839e+08	1.15081e+09	1.10513e+09	1.30081e+09	1.06681e+09	9.46021e+08	1.08122e+09	1.13367e+09	1.10318e+09	9.9947e+08	1.2983e+09	1.00757e+09	8.82644e+08	7.90051e+08	8.40264e+08	1.03621e+09	9.98156e+08	9.43976e+08	9.18578e+08	1.12231e+09	9.13105e+08	1.03443e+09	1.08122e+09	1.35181e+09	1.12986e+09	9.72621e+08	23	23	19	18	16	20	18	25
Q68FY0	22	20	1887.07	0.509914	1.03994	Exercise	Control	Cytochrome b-c1 complex subunit 1, mitochondrial OS=Rattus norvegicus GN=Uqcrc1 PE=1 SV=1	9.66157e+08	9.96323e+08	1.00212e+09	9.51414e+08	8.11319e+08	8.37526e+08	1.07555e+09	8.98157e+08	1.00551e+09	9.39571e+08	1.19e+09	9.63425e+08	8.70308e+08	8.3889e+08	1.0286e+09	1.11767e+09	9.32137e+08	1.09843e+09	8.79583e+08	7.91384e+08	7.22093e+08	7.2179e+08	8.08034e+08	9.05704e+08	8.24789e+08	7.80965e+08	1.0267e+09	8.24616e+08	9.51638e+08	8.3889e+08	1.22652e+09	1.1447e+09	9.07096e+08	36	40	38	34	38	38	39	32
P15650	26	25	2140.78	0.73519	1.02329	Exercise	Control	Long-chain specific acyl-CoA dehydrogenase, mitochondrial OS=Rattus norvegicus GN=Acadl PE=1 SV=1	8.11622e+08	7.85401e+08	8.35817e+08	7.42894e+08	7.74521e+08	7.42451e+08	9.28063e+08	7.44463e+08	8.64638e+08	6.60971e+08	1.05092e+09	7.93993e+08	7.79404e+08	8.25602e+08	7.7928e+08	8.5706e+08	8.20479e+08	8.6589e+08	7.33618e+08	6.17937e+08	6.89342e+08	6.39853e+08	6.97229e+08	7.50718e+08	7.09239e+08	5.49395e+08	9.06709e+08	6.79596e+08	8.52239e+08	8.25602e+08	9.29226e+08	8.7779e+08	7.98437e+08	36	42	37	33	36	35	37	35
Q5M9H2;D3ZMF5;P45953	41	40	3942.39	0.355319	1.05492	Exercise	Control	Acyl-Coenzyme A dehydrogenase, very long chain OS=Rattus norvegicus GN=Acadvl PE=2 SV=1	7.24631e+08	7.29082e+08	7.20097e+08	6.73135e+08	6.03169e+08	6.80179e+08	7.95231e+08	6.70258e+08	7.7095e+08	6.46478e+08	9.39723e+08	7.16895e+08	6.84921e+08	6.98042e+08	7.00853e+08	8.25763e+08	7.39316e+08	8.038e+08	6.32047e+08	5.59912e+08	5.36835e+08	5.86186e+08	5.97436e+08	6.7589e+08	6.32388e+08	5.37349e+08	8.10768e+08	6.13606e+08	7.48927e+08	6.98042e+08	8.35708e+08	8.45737e+08	7.19455e+08	62	61	58	54	59	61	63	63
Q5BJZ3;D3ZBZ4	43	42	3441.21	0.842309	1.01821	Control	Exercise	Nicotinamide nucleotide transhydrogenase OS=Rattus norvegicus GN=Nnt PE=2 SV=1	7.11862e+08	6.93902e+08	7.39717e+08	5.74229e+08	5.79159e+08	7.12973e+08	9.68579e+08	6.47926e+08	8.29794e+08	5.70966e+08	9.40623e+08	6.8371e+08	5.70967e+08	7.22732e+08	7.823e+08	7.71e+08	6.0121e+08	7.65014e+08	6.49268e+08	4.77642e+08	5.15465e+08	6.14448e+08	7.27667e+08	6.5337e+08	6.80657e+08	4.74583e+08	8.11545e+08	5.85203e+08	6.24324e+08	7.22732e+08	9.32827e+08	7.89649e+08	5.85059e+08	49	53	47	51	51	57	50	58
G3V9U2;F1LWF9	26	26	2622.41	0.848706	1.03777	Control	Exercise	3-ketoacyl-CoA thiolase, mitochondrial OS=Rattus norvegicus GN=Acaa2 PE=3 SV=1	6.60777e+08	5.35152e+08	7.79005e+08	3.57323e+08	6.44932e+08	4.92212e+08	8.37508e+08	8.33497e+08	9.04565e+08	3.29555e+08	7.60672e+08	5.12033e+08	6.39958e+08	6.14752e+08	8.59087e+08	7.93419e+08	6.78761e+08	5.89995e+08	6.83752e+08	2.9722e+08	5.74005e+08	4.24194e+08	6.29198e+08	8.405e+08	7.41989e+08	2.73924e+08	6.56288e+08	4.3826e+08	6.99762e+08	6.14752e+08	1.02439e+09	8.12611e+08	6.60527e+08	32	35	27	34	29	35	36	40
P13803	19	19	1715.42	0.242256	1.06209	Exercise	Control	Electron transfer flavoprotein subunit alpha, mitochondrial OS=Rattus norvegicus GN=Etfa PE=1 SV=4	6.4389e+08	6.28041e+08	6.44617e+08	5.96166e+08	5.50339e+08	5.55635e+08	6.46872e+08	6.36078e+08	7.38265e+08	5.71636e+08	7.6869e+08	6.59737e+08	5.69663e+08	6.69812e+08	6.84625e+08	6.80856e+08	7.01205e+08	6.92404e+08	5.65797e+08	4.95889e+08	4.89814e+08	4.78853e+08	4.85978e+08	6.41422e+08	6.05578e+08	4.7514e+08	6.63206e+08	5.64683e+08	6.22897e+08	6.69812e+08	8.16358e+08	6.97325e+08	6.82368e+08	29	32	30	29	25	28	31	37
F8WG21	30	29	2728.05	0.472432	1.02696	Exercise	Control	Succinate dehydrogenase [ubiquinone] flavoprotein subunit, mitochondrial OS=Rattus norvegicus GN=Sdha PE=4 SV=1	6.37284e+08	6.76098e+08	6.30992e+08	6.53582e+08	5.58762e+08	6.21676e+08	6.78359e+08	5.7381e+08	6.37186e+08	6.15908e+08	7.23995e+08	6.37552e+08	5.85216e+08	6.55076e+08	6.58663e+08	6.92621e+08	5.97055e+08	7.45385e+08	5.53838e+08	5.43648e+08	4.97311e+08	5.35768e+08	5.09633e+08	5.78631e+08	5.22666e+08	5.11939e+08	6.24644e+08	5.45695e+08	6.39905e+08	6.55076e+08	7.854e+08	7.09374e+08	5.81016e+08	49	46	46	47	42	48	45	53
P09605;P25809	19	19	1620.32	0.221372	1.09376	Exercise	Control	Creatine kinase S-type, mitochondrial OS=Rattus norvegicus GN=Ckmt2 PE=1 SV=2	6.35495e+08	6.31655e+08	5.06554e+08	5.82773e+08	6.31899e+08	5.94367e+08	5.31507e+08	6.13855e+08	7.63677e+08	5.38949e+08	8.53288e+08	7.2856e+08	6.80997e+08	6.9957e+08	5.82509e+08	6.37472e+08	5.90285e+08	6.96388e+08	4.44615e+08	4.84749e+08	5.62405e+08	5.12232e+08	3.99307e+08	6.19012e+08	6.26423e+08	4.47971e+08	7.36194e+08	6.23591e+08	7.44636e+08	6.9957e+08	6.94593e+08	6.52891e+08	5.74428e+08	47	36	39	42	42	38	41	45
P32551	22	22	1835.91	0.33712	1.06416	Exercise	Control	Cytochrome b-c1 complex subunit 2, mitochondrial OS=Rattus norvegicus GN=Uqcrc2 PE=1 SV=2	6.21752e+08	6.13322e+08	6.49237e+08	6.05434e+08	4.98046e+08	5.51499e+08	6.63848e+08	5.73465e+08	6.64562e+08	6.03505e+08	8.07004e+08	6.24057e+08	5.31315e+08	5.63136e+08	6.78431e+08	7.07571e+08	6.13598e+08	6.76176e+08	5.69851e+08	5.03599e+08	4.43273e+08	4.75288e+08	4.98731e+08	5.78283e+08	5.45122e+08	5.01629e+08	6.96262e+08	5.34144e+08	5.80966e+08	5.63136e+08	8.08971e+08	7.24686e+08	5.97115e+08	27	31	28	27	28	32	29	34
Q5XI78;D3ZFA6;D3ZQD3;F8WGA5	52	52	3902.43	0.352084	1.06245	Exercise	Control	2-oxoglutarate dehydrogenase, mitochondrial OS=Rattus norvegicus GN=Ogdh PE=1 SV=1	6.03983e+08	6.72419e+08	6.23571e+08	5.84648e+08	5.02153e+08	5.48896e+08	6.61451e+08	5.15437e+08	5.76987e+08	5.89649e+08	8.17303e+08	5.74823e+08	5.76979e+08	6.14441e+08	5.82286e+08	6.79877e+08	5.4281e+08	7.41329e+08	5.47324e+08	4.86309e+08	4.46928e+08	4.73045e+08	4.96931e+08	5.19768e+08	4.73286e+08	4.90112e+08	7.05147e+08	4.92003e+08	6.30898e+08	6.14441e+08	6.94327e+08	6.96322e+08	5.28228e+08	50	58	45	44	52	54	47	46
G3V936;Q8VHF5	20	20	1362.72	0.670307	1.0694	Control	Exercise	Citrate synthase OS=Rattus norvegicus GN=Cs PE=3 SV=1	5.91123e+08	8.41289e+08	8.04096e+08	7.45156e+08	4.11536e+08	5.31547e+08	6.0493e+08	4.67105e+08	4.81933e+08	7.91995e+08	6.94013e+08	5.02891e+08	4.94568e+08	5.39139e+08	5.23609e+08	5.47903e+08	4.76265e+08	9.27506e+08	7.05775e+08	6.19818e+08	3.66276e+08	4.58093e+08	4.54468e+08	4.71029e+08	3.95317e+08	6.58301e+08	5.98776e+08	4.30435e+08	5.40786e+08	5.39139e+08	6.2436e+08	5.61156e+08	4.6347e+08	31	26	26	21	21	18	19	23
Q66HF1	34	33	3022.8	0.438191	1.04662	Exercise	Control	NADH-ubiquinone oxidoreductase 75 kDa subunit, mitochondrial OS=Rattus norvegicus GN=Ndufs1 PE=1 SV=1	5.69094e+08	6.05761e+08	5.61305e+08	5.2514e+08	4.87949e+08	5.19112e+08	6.04116e+08	5.25843e+08	6.19818e+08	5.67176e+08	6.81177e+08	5.2505e+08	5.04249e+08	5.25078e+08	6.23418e+08	6.86818e+08	5.43492e+08	6.67841e+08	4.92672e+08	4.3681e+08	4.34287e+08	4.47377e+08	4.53856e+08	5.30261e+08	5.0842e+08	4.71433e+08	5.87702e+08	4.49402e+08	5.51371e+08	5.25078e+08	7.43374e+08	7.03431e+08	5.28891e+08	39	44	38	36	46	39	46	42
Q64428;F1M9X9	35	34	3102.14	0.515042	1.05124	Exercise	Control	Trifunctional enzyme subunit alpha, mitochondrial OS=Rattus norvegicus GN=Hadha PE=1 SV=2	5.21846e+08	4.57098e+08	6.02242e+08	4.00265e+08	4.12804e+08	4.06326e+08	5.41778e+08	5.63777e+08	6.8619e+08	4.03946e+08	6.25968e+08	5.07121e+08	4.83795e+08	5.00096e+08	5.98663e+08	6.05918e+08	5.53549e+08	5.03943e+08	5.28603e+08	3.32939e+08	3.67405e+08	3.50176e+08	4.07023e+08	5.68514e+08	5.62862e+08	3.35758e+08	5.40068e+08	4.34056e+08	5.29005e+08	5.00096e+08	7.13855e+08	6.20574e+08	5.38679e+08	51	51	40	47	39	50	55	62
P31399;D3ZBE6;D3ZWT8;F1LNT9	10	10	828.89	0.422265	1.05688	Exercise	Control	ATP synthase subunit d, mitochondrial OS=Rattus norvegicus GN=Atp5h PE=1 SV=3	5.05537e+08	4.8465e+08	5.17567e+08	4.77031e+08	4.23478e+08	4.74885e+08	5.52378e+08	4.61862e+08	5.40608e+08	4.40321e+08	6.66133e+08	4.6491e+08	4.39781e+08	5.03818e+08	5.48334e+08	5.82509e+08	5.10328e+08	5.34318e+08	4.54282e+08	3.96793e+08	3.76906e+08	4.09261e+08	4.14987e+08	4.65742e+08	4.43445e+08	3.65992e+08	5.74722e+08	3.97927e+08	4.80878e+08	5.03818e+08	6.53842e+08	5.96599e+08	4.96619e+08	14	11	13	14	9	13	16	12
D3ZD09	7	7	539.63	0.823864	1.00604	Exercise	Control	Cytochrome c oxidase subunit 6B1 OS=Rattus norvegicus GN=LOC681754 PE=4 SV=1	5.02647e+08	5.34598e+08	5.168e+08	4.75309e+08	4.31508e+08	4.38488e+08	5.52516e+08	4.56797e+08	6.0304e+08	5.23776e+08	5.61164e+08	5.18775e+08	4.697e+08	5.07269e+08	4.99883e+08	4.73349e+08	4.79374e+08	5.89385e+08	4.53608e+08	3.95361e+08	3.84053e+08	3.77894e+08	4.15091e+08	4.60635e+08	4.94657e+08	4.3536e+08	4.84158e+08	4.4403e+08	5.13594e+08	5.07269e+08	5.96069e+08	4.84799e+08	4.66496e+08	18	16	17	19	17	18	18	20
Q9Z2L0;D3ZCI4;F1LU57	17	8	2092.33	0.643274	1.02678	Control	Exercise	Voltage-dependent anion-selective channel protein 1 OS=Rattus norvegicus GN=Vdac1 PE=1 SV=4	4.93295e+08	5.41878e+08	5.09619e+08	4.35761e+08	4.68968e+08	4.38804e+08	5.6891e+08	4.67234e+08	5.67319e+08	4.38837e+08	5.79701e+08	4.74121e+08	3.81674e+08	4.80879e+08	5.38674e+08	5.26863e+08	4.7347e+08	5.9741e+08	4.47306e+08	3.62464e+08	4.17393e+08	3.78166e+08	4.27407e+08	4.7116e+08	4.65356e+08	3.64758e+08	5.00151e+08	4.05811e+08	4.17342e+08	4.80879e+08	6.42324e+08	5.39607e+08	4.60751e+08	26	26	23	25	22	24	23	27
Q6P6R2;D3ZIY6	21	21	2080.29	0.743779	1.01975	Exercise	Control	Dihydrolipoyl dehydrogenase, mitochondrial OS=Rattus norvegicus GN=Dld PE=1 SV=1	4.74163e+08	5.52903e+08	5.20686e+08	5.35438e+08	4.13685e+08	3.85847e+08	4.72662e+08	3.9136e+08	4.83637e+08	5.08812e+08	6.10604e+08	4.96229e+08	4.18985e+08	4.51474e+08	4.58089e+08	4.40788e+08	4.45409e+08	6.09565e+08	4.57019e+08	4.45376e+08	3.68189e+08	3.32527e+08	3.55098e+08	3.94648e+08	3.96714e+08	4.22921e+08	5.26813e+08	4.24733e+08	4.58139e+08	4.51474e+08	5.46232e+08	4.5145e+08	4.33444e+08	40	43	44	41	37	37	34	32
Q68FU3	22	22	1809.15	0.72058	1.02533	Exercise	Control	Electron transfer flavoprotein subunit beta OS=Rattus norvegicus GN=Etfb PE=2 SV=3	4.41549e+08	3.93957e+08	3.92069e+08	3.78585e+08	4.1797e+08	4.66501e+08	4.88378e+08	4.45355e+08	5.05401e+08	3.54606e+08	4.90005e+08	4.47999e+08	3.8591e+08	4.48506e+08	4.21893e+08	5.31868e+08	4.95779e+08	4.3433e+08	3.44128e+08	3.14906e+08	3.72003e+08	4.02036e+08	3.66905e+08	4.49097e+08	4.14567e+08	2.94747e+08	4.22763e+08	3.83452e+08	4.21973e+08	4.48506e+08	5.03071e+08	5.44733e+08	4.82461e+08	31	32	29	31	28	28	27	32
P49432	13	13	1399.17	0.0409457	1.10264	Exercise	Control	Pyruvate dehydrogenase E1 component subunit beta, mitochondrial OS=Rattus norvegicus GN=Pdhb PE=1 SV=2	4.36898e+08	4.4479e+08	4.04274e+08	4.03285e+08	3.86352e+08	4.17675e+08	4.50176e+08	3.94304e+08	4.23711e+08	3.94255e+08	5.43716e+08	4.4193e+08	4.41116e+08	4.43826e+08	4.94332e+08	4.92775e+08	4.13858e+08	4.90373e+08	3.54841e+08	3.35451e+08	3.43862e+08	3.59957e+08	3.38206e+08	3.97617e+08	3.47558e+08	3.27702e+08	4.69104e+08	3.78257e+08	4.82338e+08	4.43826e+08	5.8945e+08	5.04694e+08	4.0274e+08	26	26	23	22	24	24	26	25
P19511	17	17	1062.39	0.950587	1.00043	Exercise	Control	ATP synthase subunit b, mitochondrial OS=Rattus norvegicus GN=Atp5f1 PE=1 SV=1	4.3575e+08	4.89197e+08	4.57731e+08	4.26444e+08	3.60691e+08	4.1499e+08	4.57309e+08	4.49057e+08	4.29829e+08	5.00849e+08	5.24049e+08	3.99433e+08	3.796e+08	3.9669e+08	4.85365e+08	4.15766e+08	3.84994e+08	5.39331e+08	4.01762e+08	3.54715e+08	3.21023e+08	3.57643e+08	3.43564e+08	4.5283e+08	3.52577e+08	4.16303e+08	4.52136e+08	3.41883e+08	4.15073e+08	3.9669e+08	5.78756e+08	4.25823e+08	3.74652e+08	19	24	18	14	17	17	21	17
Q5XIH3	22	22	1691.79	0.895692	1.00483	Control	Exercise	NADH dehydrogenase (Ubiquinone) flavoprotein 1 OS=Rattus norvegicus GN=Ndufv1 PE=2 SV=1	4.3278e+08	4.4132e+08	4.53066e+08	3.63786e+08	3.87416e+08	4.43622e+08	4.85522e+08	4.24283e+08	4.71566e+08	3.71116e+08	4.4867e+08	4.30344e+08	3.7049e+08	4.31019e+08	4.72265e+08	5.31234e+08	3.98759e+08	4.86548e+08	3.97667e+08	3.02596e+08	3.44809e+08	3.82318e+08	3.6476e+08	4.27848e+08	3.86813e+08	3.08469e+08	3.87101e+08	3.68341e+08	4.05112e+08	4.31019e+08	5.63136e+08	5.44083e+08	3.88047e+08	31	25	25	31	24	28	21	27
D4A5G8;Q06437	23	22	1722.78	0.0435865	1.13579	Exercise	Control	Uncharacterized protein OS=Rattus norvegicus GN=LOC685778 PE=4 SV=1	4.29405e+08	4.11441e+08	3.96681e+08	3.97496e+08	3.4203e+08	3.92665e+08	4.51856e+08	3.93163e+08	4.31497e+08	3.56215e+08	5.47439e+08	4.45426e+08	4.1796e+08	4.39102e+08	4.90321e+08	5.14404e+08	4.42782e+08	4.53606e+08	3.48177e+08	3.30636e+08	3.04415e+08	3.38404e+08	3.39468e+08	3.96466e+08	3.53945e+08	2.96084e+08	4.72316e+08	3.81249e+08	4.57018e+08	4.39102e+08	5.84667e+08	5.26846e+08	4.30887e+08	21	24	23	22	25	21	23	21
G3V741;P16036	18	18	1372.64	0.907411	1.00398	Exercise	Control	Phosphate carrier protein, mitochondrial OS=Rattus norvegicus GN=Slc25a3 PE=3 SV=1	4.24477e+08	4.08421e+08	4.13614e+08	3.95811e+08	3.66532e+08	4.46156e+08	5.26542e+08	3.66406e+08	4.65578e+08	3.91152e+08	5.13616e+08	4.2775e+08	3.73446e+08	4.084e+08	4.39118e+08	4.43367e+08	4.05718e+08	4.50277e+08	3.6304e+08	3.29235e+08	3.26222e+08	3.84503e+08	3.95577e+08	3.69484e+08	3.81901e+08	3.25123e+08	4.43134e+08	3.6612e+08	4.08344e+08	4.084e+08	5.23611e+08	4.54091e+08	3.94819e+08	22	17	16	16	23	18	15	17
P20788	11	11	1015.41	0.286464	1.05779	Exercise	Control	Cytochrome b-c1 complex subunit Rieske, mitochondrial OS=Rattus norvegicus GN=Uqcrfs1 PE=1 SV=2	4.07623e+08	4.15967e+08	4.36003e+08	3.96693e+08	3.68793e+08	3.6536e+08	4.37137e+08	3.32504e+08	4.16947e+08	3.98492e+08	5.08233e+08	4.31069e+08	3.59639e+08	3.90244e+08	4.15303e+08	4.46343e+08	4.03242e+08	4.58596e+08	3.82691e+08	3.29968e+08	3.28234e+08	3.14872e+08	3.28409e+08	3.35297e+08	3.4201e+08	3.31224e+08	4.3849e+08	3.68961e+08	3.93247e+08	3.90244e+08	4.95214e+08	4.57139e+08	3.92409e+08	21	26	23	22	20	21	22	25
D3ZFQ8	12	12	1271.43	0.59592	1.042	Exercise	Control	Cytochrome c-1 (Predicted), isoform CRA_c OS=Rattus norvegicus GN=Cyc1 PE=4 SV=1	4.06066e+08	4.24778e+08	4.46645e+08	4.26239e+08	2.61432e+08	4.46789e+08	4.44165e+08	3.90582e+08	3.41076e+08	3.87889e+08	5.26576e+08	3.29352e+08	3.93829e+08	4.10137e+08	4.50584e+08	4.55842e+08	3.61136e+08	4.6831e+08	3.92032e+08	3.54545e+08	2.32681e+08	3.85048e+08	3.33689e+08	3.93863e+08	2.79775e+08	3.22411e+08	4.54316e+08	2.819e+08	4.30633e+08	4.10137e+08	5.37283e+08	4.66868e+08	3.51434e+08	24	21	20	17	18	22	24	23
P68136;D3ZRN3;D4A5S4;F1LTQ2	27	5	2666.61	0.00782813	1.5912	Control	Exercise	Actin, alpha skeletal muscle OS=Rattus norvegicus GN=Acta1 PE=1 SV=1	3.8923e+08	4.15078e+08	4.26144e+08	4.44451e+08	4.51625e+08	7.91767e+08	5.74194e+08	4.08551e+08	3.12472e+08	3.06438e+08	1.5077e+08	2.93094e+08	4.53764e+08	3.64093e+08	2.1499e+08	2.88586e+08	3.31656e+08	4.57616e+08	3.74037e+08	3.69693e+08	4.01957e+08	6.82354e+08	4.31377e+08	4.11983e+08	2.56312e+08	2.54709e+08	1.3008e+08	2.50866e+08	4.96168e+08	3.64093e+08	2.56357e+08	2.95566e+08	3.22746e+08	7	9	7	9	10	9	8	8
P14604	15	14	1168.91	0.366663	1.05221	Exercise	Control	Enoyl-CoA hydratase, mitochondrial OS=Rattus norvegicus GN=Echs1 PE=1 SV=1	3.68628e+08	3.63344e+08	3.80315e+08	3.68142e+08	3.02852e+08	3.09732e+08	4.13047e+08	3.35311e+08	4.0126e+08	3.49827e+08	4.68201e+08	3.66856e+08	3.40299e+08	3.53511e+08	3.86652e+08	4.06481e+08	3.52222e+08	4.0058e+08	3.33812e+08	3.0622e+08	2.69545e+08	2.66931e+08	3.10311e+08	3.38128e+08	3.29142e+08	2.90774e+08	4.03951e+08	3.14e+08	3.721e+08	3.53511e+08	4.6105e+08	4.16313e+08	3.4276e+08	26	24	25	26	26	30	24	30
Q64578	47	27	4052.52	0.275486	1.09609	Exercise	Control	Sarcoplasmic/endoplasmic reticulum calcium ATPase 1 OS=Rattus norvegicus GN=Atp2a1 PE=2 SV=1	3.66064e+08	3.31726e+08	3.73489e+08	3.19761e+08	4.60936e+08	3.55968e+08	3.60517e+08	3.67377e+08	2.24486e+08	3.79446e+08	3.30043e+08	4.83109e+08	4.23106e+08	3.73205e+08	4.04625e+08	3.04604e+08	3.64626e+08	3.65722e+08	3.27821e+08	2.65976e+08	4.10244e+08	3.06777e+08	2.70847e+08	3.70464e+08	1.84139e+08	3.15393e+08	2.84752e+08	4.13504e+08	4.62646e+08	3.73205e+08	4.82481e+08	3.11972e+08	3.54831e+08	35	43	31	50	30	35	38	28
P08503;G3V796	19	18	1428.52	0.158568	1.09787	Exercise	Control	Medium-chain specific acyl-CoA dehydrogenase, mitochondrial OS=Rattus norvegicus GN=Acadm PE=1 SV=1	3.58851e+08	3.79442e+08	3.81557e+08	3.58665e+08	2.64749e+08	2.97536e+08	3.49085e+08	3.61485e+08	3.44363e+08	3.45381e+08	4.76581e+08	3.80167e+08	3.24938e+08	3.36751e+08	3.58125e+08	4.09884e+08	3.72905e+08	4.18328e+08	3.34903e+08	2.98337e+08	2.35633e+08	2.5642e+08	2.62259e+08	3.64522e+08	2.82471e+08	2.87078e+08	4.11181e+08	3.25393e+08	3.55304e+08	3.36751e+08	4.27033e+08	4.19798e+08	3.62888e+08	24	23	19	19	20	17	22	24
Q06647	11	11	1241.98	0.685341	1.02008	Exercise	Control	ATP synthase subunit O, mitochondrial OS=Rattus norvegicus GN=Atp5o PE=1 SV=1	3.55112e+08	3.55684e+08	3.47891e+08	3.34708e+08	2.95564e+08	3.14492e+08	3.70957e+08	3.93229e+08	4.00129e+08	3.07288e+08	3.8399e+08	3.38055e+08	3.23925e+08	3.81038e+08	3.93805e+08	3.92339e+08	3.48702e+08	3.92135e+08	3.05353e+08	2.78409e+08	2.63059e+08	2.71033e+08	2.7869e+08	3.96533e+08	3.28215e+08	2.55416e+08	3.31297e+08	2.89348e+08	3.54196e+08	3.81038e+08	4.69579e+08	4.01829e+08	3.39335e+08	21	21	18	21	20	22	16	21
Q6PDU7	4	4	595.84	0.946848	1.00371	Control	Exercise	ATP synthase subunit g, mitochondrial OS=Rattus norvegicus GN=Atp5l PE=1 SV=2	3.51047e+08	4.04656e+08	4.00396e+08	3.54077e+08	3.11055e+08	3.30738e+08	3.65941e+08	3.19014e+08	3.27704e+08	3.30186e+08	4.32066e+08	3.44353e+08	3.16874e+08	3.4418e+08	3.63115e+08	3.40879e+08	3.31524e+08	4.46126e+08	3.51438e+08	2.9452e+08	2.76846e+08	2.85034e+08	2.74922e+08	3.21694e+08	2.68806e+08	2.74449e+08	3.72776e+08	2.94739e+08	3.46486e+08	3.4418e+08	4.32984e+08	3.49124e+08	3.22618e+08	14	12	14	11	10	12	12	12
P18163;D3ZW20	38	35	2684.32	0.789708	1.01601	Control	Exercise	Long-chain-fatty-acid--CoA ligase 1 OS=Rattus norvegicus GN=Acsl1 PE=1 SV=1	3.28361e+08	3.45111e+08	3.34382e+08	2.95887e+08	2.79667e+08	2.93389e+08	3.80665e+08	3.53358e+08	3.65287e+08	3.00916e+08	3.90944e+08	3.1194e+08	2.9032e+08	3.11502e+08	3.29061e+08	3.38582e+08	3.32759e+08	3.80478e+08	2.93495e+08	2.46118e+08	2.4891e+08	2.52846e+08	2.85983e+08	3.56327e+08	2.99635e+08	2.50119e+08	3.37296e+08	2.66996e+08	3.1745e+08	3.11502e+08	3.92378e+08	3.46772e+08	3.2382e+08	32	33	28	31	27	29	35	29
P11240	9	9	760.93	0.433815	1.06626	Exercise	Control	Cytochrome c oxidase subunit 5A, mitochondrial OS=Rattus norvegicus GN=Cox5a PE=1 SV=1	3.1786e+08	3.20377e+08	3.36264e+08	2.65194e+08	2.85088e+08	2.68327e+08	3.15877e+08	3.29936e+08	3.40269e+08	2.91349e+08	4.60971e+08	3.02699e+08	2.77102e+08	3.23506e+08	3.61835e+08	3.23618e+08	2.83343e+08	3.5321e+08	2.95147e+08	2.20587e+08	2.53735e+08	2.31248e+08	2.3731e+08	3.32708e+08	2.79113e+08	2.42168e+08	3.97713e+08	2.59087e+08	3.02997e+08	3.23506e+08	4.31458e+08	3.31446e+08	2.75731e+08	10	14	11	11	13	13	11	14
P14408;Q5M964	25	24	1766.94	0.994803	1.00689	Exercise	Control	Fumarate hydratase, mitochondrial OS=Rattus norvegicus GN=Fh PE=1 SV=1	3.16742e+08	2.86952e+08	3.41796e+08	3.2729e+08	2.69919e+08	3.12689e+08	3.737e+08	3.02388e+08	3.10508e+08	2.44139e+08	3.97835e+08	3.15884e+08	2.56862e+08	3.25729e+08	3.53147e+08	3.53296e+08	2.95743e+08	3.16359e+08	3.00003e+08	2.72239e+08	2.40234e+08	2.69479e+08	2.80751e+08	3.04928e+08	2.54701e+08	2.02927e+08	3.43241e+08	2.70372e+08	2.80866e+08	3.25729e+08	4.21098e+08	3.61842e+08	2.87798e+08	27	29	26	23	22	25	21	23
P08461	18	18	1508.62	0.100368	1.08574	Exercise	Control	Dihydrolipoyllysine-residue acetyltransferase component of pyruvate dehydrogenase complex, mitochondrial OS=Rattus norvegicus GN=Dlat PE=1 SV=3	3.05004e+08	3.05367e+08	3.11891e+08	2.9298e+08	2.73093e+08	2.63352e+08	3.10338e+08	2.68456e+08	3.14252e+08	2.85358e+08	3.84454e+08	3.37202e+08	2.78643e+08	3.0552e+08	3.21152e+08	3.32262e+08	2.95745e+08	3.36661e+08	2.73754e+08	2.437e+08	2.43059e+08	2.2696e+08	2.33149e+08	2.70712e+08	2.57773e+08	2.37188e+08	3.31697e+08	2.88618e+08	3.04682e+08	3.0552e+08	3.82947e+08	3.40299e+08	2.878e+08	23	23	23	23	21	20	20	25
B2RZD6	5	5	399.14	0.313616	1.08707	Exercise	Control	Ndufa4 protein OS=Rattus norvegicus GN=Ndufa4 PE=4 SV=1	2.96065e+08	2.62477e+08	2.80829e+08	2.63495e+08	2.34264e+08	2.71054e+08	3.44889e+08	2.69457e+08	3.43241e+08	2.94486e+08	3.70041e+08	3.88035e+08	2.54553e+08	3.17801e+08	3.25459e+08	2.71168e+08	2.45792e+08	2.89376e+08	2.4649e+08	2.19175e+08	2.085e+08	2.33597e+08	2.59106e+08	2.71721e+08	2.81551e+08	2.44775e+08	3.19262e+08	3.32127e+08	2.78341e+08	3.17801e+08	3.88082e+08	2.77728e+08	2.39189e+08	5	6	6	8	9	8	9	6
P10888	11	11	540.28	0.931426	1.00083	Exercise	Control	Cytochrome c oxidase subunit 4 isoform 1, mitochondrial OS=Rattus norvegicus GN=Cox4i1 PE=1 SV=1	2.95043e+08	3.00124e+08	2.97073e+08	2.74808e+08	2.82512e+08	2.72174e+08	3.09898e+08	2.74222e+08	3.48555e+08	2.49048e+08	3.90955e+08	3.20252e+08	2.73341e+08	2.81158e+08	3.03885e+08	2.77847e+08	2.64837e+08	3.30882e+08	2.60749e+08	2.28585e+08	2.51442e+08	2.34563e+08	2.32818e+08	2.76526e+08	2.8591e+08	2.07007e+08	3.37306e+08	2.7411e+08	2.98885e+08	2.81158e+08	3.62357e+08	2.84568e+08	2.57723e+08	10	10	9	8	10	12	12	11
P11884;F1LN88;P13601;Q63639	27	24	1752.84	0.381647	1.05008	Control	Exercise	Aldehyde dehydrogenase, mitochondrial OS=Rattus norvegicus GN=Aldh2 PE=1 SV=1	2.92023e+08	2.82624e+08	3.18833e+08	3.04756e+08	2.46126e+08	2.70923e+08	3.21208e+08	3.32844e+08	3.15941e+08	2.6192e+08	3.71285e+08	2.64242e+08	2.54969e+08	2.80886e+08	2.74196e+08	3.05522e+08	2.66095e+08	3.11588e+08	2.79848e+08	2.53495e+08	2.19058e+08	2.33484e+08	2.41315e+08	3.3564e+08	2.59157e+08	2.17706e+08	3.20335e+08	2.2617e+08	2.78796e+08	2.80886e+08	3.26955e+08	3.12912e+08	2.58947e+08	23	27	22	21	24	23	25	21
Q6PCU0	16	16	1144.5	0.702284	1.02504	Exercise	Control	ATP synthase gamma chain OS=Rattus norvegicus GN=Atp5c1 PE=2 SV=1	2.71049e+08	2.49093e+08	2.61831e+08	2.4584e+08	2.31031e+08	2.52162e+08	3.14421e+08	2.68137e+08	3.19068e+08	2.20347e+08	3.23031e+08	2.73257e+08	2.38575e+08	2.62775e+08	2.89479e+08	3.09779e+08	2.77963e+08	2.74621e+08	2.29816e+08	2.04489e+08	2.05623e+08	2.17316e+08	2.36217e+08	2.7039e+08	2.61723e+08	1.83151e+08	2.78703e+08	2.33886e+08	2.6087e+08	2.62775e+08	3.4518e+08	3.17272e+08	2.70496e+08	19	18	15	20	16	16	17	18
Q641Y2;D3ZBB9	22	22	1604.78	0.996058	1.00022	Control	Exercise	NADH dehydrogenase [ubiquinone] iron-sulfur protein 2, mitochondrial OS=Rattus norvegicus GN=Ndufs2 PE=1 SV=1	2.45874e+08	2.47692e+08	2.39464e+08	2.25645e+08	2.13973e+08	2.55743e+08	2.91972e+08	2.29524e+08	2.63193e+08	2.29814e+08	2.85683e+08	2.31718e+08	2.10406e+08	2.42214e+08	2.57808e+08	2.72071e+08	2.37064e+08	2.73076e+08	2.10183e+08	1.87691e+08	1.90441e+08	2.20403e+08	2.19351e+08	2.31453e+08	2.1589e+08	1.9102e+08	2.4648e+08	1.98333e+08	2.30068e+08	2.42214e+08	3.07414e+08	2.78652e+08	2.30696e+08	23	25	19	25	23	26	22	23
P04692;G3V9I6;Q63607;Q923Z2	30	10	2194.02	0.0164803	2.01265	Control	Exercise	Tropomyosin alpha-1 chain OS=Rattus norvegicus GN=Tpm1 PE=1 SV=3	2.38892e+08	4.549e+08	4.40026e+08	3.25835e+08	2.97017e+08	5.19926e+08	2.25921e+08	1.89792e+08	1.00114e+08	2.57331e+08	1.44854e+08	7.42224e+07	2.38998e+08	1.31973e+08	1.65705e+08	1.11368e+08	1.44289e+08	5.01519e+08	3.86221e+08	2.71029e+08	2.64352e+08	4.48078e+08	1.69729e+08	1.91387e+08	8.21207e+07	2.13892e+08	1.24976e+08	6.35286e+07	2.61332e+08	1.31973e+08	1.97589e+08	1.14062e+08	1.40413e+08	11	9	10	8	12	10	10	7
P07895	10	9	903.09	0.286236	1.04411	Exercise	Control	Superoxide dismutase [Mn], mitochondrial OS=Rattus norvegicus GN=Sod2 PE=1 SV=2	2.38054e+08	2.60218e+08	2.30952e+08	2.36185e+08	1.93494e+08	2.27247e+08	2.58605e+08	2.36216e+08	2.20422e+08	2.30524e+08	2.75375e+08	2.59619e+08	2.37808e+08	2.40342e+08	2.28695e+08	2.44176e+08	2.28985e+08	2.86886e+08	2.02712e+08	1.96458e+08	1.72214e+08	1.95844e+08	1.94283e+08	2.38201e+08	1.80806e+08	1.9161e+08	2.37586e+08	2.22213e+08	2.60031e+08	2.40342e+08	2.72699e+08	2.50083e+08	2.22834e+08	18	14	15	12	13	9	13	13
P63039;D3Z9X1;D3ZVX2;D4ABH6;F1M6U4	31	30	2394.74	0.526202	1.05485	Exercise	Control	60 kDa heat shock protein, mitochondrial OS=Rattus norvegicus GN=Hspd1 PE=1 SV=1	2.26357e+08	2.08898e+08	2.4544e+08	1.89933e+08	1.86683e+08	1.87162e+08	2.589e+08	2.28465e+08	2.57043e+08	1.86231e+08	3.06242e+08	2.33461e+08	2.02702e+08	2.31778e+08	2.75504e+08	2.15764e+08	2.0751e+08	2.30306e+08	2.15428e+08	1.57986e+08	1.66152e+08	1.61298e+08	1.94505e+08	2.30384e+08	2.10845e+08	1.54794e+08	2.64217e+08	1.99824e+08	2.21644e+08	2.31778e+08	3.28515e+08	2.20983e+08	2.01935e+08	30	29	26	26	24	36	27	33
F1M953;P48721	35	33	2877.85	0.0884992	1.10608	Exercise	Control	Stress-70 protein, mitochondrial OS=Rattus norvegicus GN=Hspa9 PE=3 SV=1	2.24867e+08	2.02999e+08	2.10654e+08	2.08267e+08	1.89625e+08	2.00267e+08	2.54939e+08	2.01663e+08	2.39917e+08	1.94362e+08	2.88481e+08	2.39541e+08	2.11511e+08	2.32581e+08	2.52457e+08	2.38449e+08	2.32164e+08	2.23803e+08	1.84897e+08	1.73236e+08	1.68771e+08	1.72592e+08	1.91529e+08	2.03357e+08	1.96797e+08	1.61552e+08	2.48894e+08	2.05029e+08	2.31277e+08	2.32581e+08	3.01033e+08	2.44217e+08	2.25928e+08	36	40	38	39	38	39	36	39
Q561S0	15	15	1381.19	0.864211	1.01036	Control	Exercise	NADH dehydrogenase [ubiquinone] 1 alpha subcomplex subunit 10, mitochondrial OS=Rattus norvegicus GN=Ndufa10 PE=1 SV=1	2.22878e+08	2.56624e+08	2.37013e+08	2.16071e+08	1.98366e+08	1.78398e+08	2.43784e+08	2.09759e+08	2.52196e+08	2.27185e+08	2.4884e+08	1.96895e+08	1.74443e+08	1.93217e+08	2.57166e+08	2.45492e+08	2.30602e+08	2.82923e+08	2.08032e+08	1.79727e+08	1.7655e+08	1.53746e+08	1.83148e+08	2.11521e+08	2.06869e+08	1.88835e+08	2.14693e+08	1.68527e+08	1.90745e+08	1.93217e+08	3.06648e+08	2.5143e+08	2.24407e+08	23	23	20	24	21	23	22	24
B2GV06;F1LQE8;F1M2B3	17	17	1666.93	0.434554	1.06486	Control	Exercise	Succinyl-CoA:3-ketoacid coenzyme A transferase 1, mitochondrial OS=Rattus norvegicus GN=Oxct1 PE=1 SV=1	2.14237e+08	2.08011e+08	1.72805e+08	2.04548e+08	2.04574e+08	1.95702e+08	2.52425e+08	2.40108e+08	2.89556e+08	2.19321e+08	2.47024e+08	1.98131e+08	1.81891e+08	1.78492e+08	2.28704e+08	2.11317e+08	1.9518e+08	2.29329e+08	1.51675e+08	1.70143e+08	1.82076e+08	1.68658e+08	1.89641e+08	2.42125e+08	2.37514e+08	1.82298e+08	2.13126e+08	1.69585e+08	1.98889e+08	1.78492e+08	2.7271e+08	2.16429e+08	1.89937e+08	23	17	20	19	22	23	18	26
Q5BK63	18	18	1607.27	0.70589	1.02601	Control	Exercise	NADH dehydrogenase [ubiquinone] 1 alpha subcomplex subunit 9, mitochondrial OS=Rattus norvegicus GN=Ndufa9 PE=1 SV=2	2.13555e+08	2.50716e+08	2.32157e+08	1.92556e+08	1.69998e+08	2.11623e+08	2.40235e+08	1.98655e+08	2.34432e+08	2.38936e+08	2.3654e+08	1.84411e+08	1.78101e+08	2.00379e+08	2.28866e+08	2.23899e+08	1.95378e+08	2.7641e+08	2.0377e+08	1.60168e+08	1.51302e+08	1.82379e+08	1.80482e+08	2.00324e+08	1.92298e+08	1.98602e+08	2.04081e+08	1.57842e+08	1.94745e+08	2.00379e+08	2.72903e+08	2.29315e+08	1.90129e+08	22	21	19	21	22	22	19	18
P17764	22	22	1841.86	0.641647	1.04078	Exercise	Control	Acetyl-CoA acetyltransferase, mitochondrial OS=Rattus norvegicus GN=Acat1 PE=1 SV=1	2.07984e+08	1.70314e+08	2.20471e+08	1.90187e+08	1.51713e+08	1.23372e+08	2.16936e+08	2.65808e+08	2.91829e+08	1.41185e+08	2.20899e+08	2.30275e+08	1.90183e+08	2.20167e+08	2.10162e+08	2.83986e+08	2.00264e+08	1.87768e+08	1.93513e+08	1.58197e+08	1.35028e+08	1.06324e+08	1.62978e+08	2.68042e+08	2.39379e+08	1.17352e+08	1.90586e+08	1.97097e+08	2.07955e+08	2.20167e+08	2.50601e+08	2.90855e+08	1.94884e+08	23	27	25	20	21	23	24	24
P58775;F1LP83;F1LRB1;F1M0S3	28	11	1900.39	0.0118726	2.0619	Control	Exercise	Tropomyosin beta chain OS=Rattus norvegicus GN=Tpm2 PE=2 SV=1	2.01271e+08	3.62571e+08	4.01712e+08	2.51976e+08	2.56701e+08	4.3875e+08	2.1398e+08	1.54628e+08	8.82767e+07	2.02499e+08	1.19873e+08	5.93051e+07	1.80557e+08	1.17201e+08	1.42223e+08	9.70705e+07	1.33016e+08	3.99728e+08	3.52593e+08	2.09593e+08	2.28469e+08	3.7812e+08	1.60758e+08	1.55927e+08	7.24109e+07	1.68316e+08	1.03424e+08	5.07605e+07	1.9743e+08	1.17201e+08	1.69589e+08	9.94185e+07	1.29443e+08	11	11	8	6	10	8	6	6
D4A6B2;D3ZDF7;D3ZSD1;Q3KR86	40	39	3117.38	0.640138	1.02834	Control	Exercise	Mitochondrial inner membrane protein OS=Rattus norvegicus GN=Immt PE=4 SV=1	1.98204e+08	2.02727e+08	2.04561e+08	1.80072e+08	1.77287e+08	1.83848e+08	2.35464e+08	1.86354e+08	2.37476e+08	1.64049e+08	2.48492e+08	1.94499e+08	1.75523e+08	1.81745e+08	2.03123e+08	2.21308e+08	1.74739e+08	2.23503e+08	1.79548e+08	1.49784e+08	1.5779e+08	1.58443e+08	1.76898e+08	1.87919e+08	1.94795e+08	1.36356e+08	2.14393e+08	1.66476e+08	1.91926e+08	1.81745e+08	2.42207e+08	2.26661e+08	1.70045e+08	34	38	26	28	31	39	29	43
D3ZG43	13	13	1152.98	0.879852	1.00796	Control	Exercise	NADH dehydrogenase (Ubiquinone) Fe-S protein 3 (Predicted), isoform CRA_c OS=Rattus norvegicus GN=Ndufs3 PE=3 SV=1	1.97836e+08	2.12735e+08	2.22334e+08	1.86651e+08	1.82653e+08	1.85297e+08	2.22604e+08	1.68335e+08	2.08356e+08	2.06584e+08	2.14008e+08	1.91726e+08	1.62119e+08	1.71187e+08	2.05613e+08	2.14858e+08	2.10321e+08	2.34537e+08	1.95148e+08	1.55256e+08	1.62565e+08	1.59691e+08	1.67236e+08	1.6975e+08	1.70909e+08	1.71712e+08	1.8464e+08	1.64102e+08	1.77269e+08	1.71187e+08	2.45177e+08	2.20055e+08	2.04671e+08	21	15	20	18	17	18	18	16
D4A0T0;D3ZC50	13	13	938.61	0.273998	1.04689	Exercise	Control	Protein Ndufb10 OS=Rattus norvegicus GN=Ndufb10 PE=4 SV=1	1.96264e+08	1.82561e+08	1.89862e+08	1.95445e+08	1.78219e+08	1.8519e+08	2.14043e+08	1.81402e+08	2.07428e+08	1.94009e+08	2.29596e+08	2.07846e+08	1.84141e+08	1.88995e+08	2.158e+08	2.08854e+08	1.76841e+08	2.0127e+08	1.66646e+08	1.62571e+08	1.58619e+08	1.59599e+08	1.60805e+08	1.82926e+08	1.70147e+08	1.61259e+08	1.9809e+08	1.779e+08	2.01349e+08	1.88995e+08	2.57324e+08	2.13906e+08	1.7209e+08	13	13	14	13	12	14	13	18
B1H216;G3V8R3	10	8	846.27	0.478916	1.44481	Exercise	Control	Hemoglobin alpha, adult chain 2 OS=Rattus norvegicus GN=Hba-a2 PE=2 SV=1	1.95618e+08	2.09885e+08	1.93313e+08	1.4707e+08	2.18503e+08	2.13358e+08	1.43707e+08	1.02555e+08	5.18302e+07	2.4688e+08	1.85553e+08	2.55891e+08	3.09385e+08	3.398e+08	5.42742e+07	5.42028e+07	4.03689e+08	2.31394e+08	1.69675e+08	1.22332e+08	1.94472e+08	1.83874e+08	1.07963e+08	1.03416e+08	4.25149e+07	2.05205e+08	1.6009e+08	2.19023e+08	3.38297e+08	3.398e+08	6.47174e+07	5.55139e+07	3.92844e+08	14	13	11	14	13	11	9	8
P19234	12	12	1003.29	0.593855	1.02176	Exercise	Control	NADH dehydrogenase [ubiquinone] flavoprotein 2, mitochondrial OS=Rattus norvegicus GN=Ndufv2 PE=1 SV=2	1.90582e+08	1.94452e+08	1.7966e+08	1.78231e+08	1.73271e+08	1.75926e+08	2.16017e+08	1.7498e+08	2.15713e+08	1.94786e+08	2.13389e+08	1.88586e+08	1.68242e+08	1.8591e+08	2.0117e+08	2.05353e+08	1.83634e+08	2.1438e+08	1.57692e+08	1.48252e+08	1.54215e+08	1.51615e+08	1.62288e+08	1.7645e+08	1.76943e+08	1.61905e+08	1.84107e+08	1.61415e+08	1.83964e+08	1.8591e+08	2.39879e+08	2.1032e+08	1.78701e+08	20	20	19	17	18	20	15	20
Q6UPE1	27	26	1896.19	0.747076	1.01827	Exercise	Control	Electron transfer flavoprotein-ubiquinone oxidoreductase, mitochondrial OS=Rattus norvegicus GN=Etfdh PE=2 SV=1	1.88817e+08	1.94315e+08	1.75547e+08	1.78199e+08	1.61929e+08	1.86318e+08	1.98483e+08	1.93188e+08	2.08882e+08	1.58643e+08	2.07046e+08	1.86699e+08	1.77625e+08	1.71605e+08	2.07776e+08	2.18059e+08	1.96755e+08	2.14229e+08	1.54082e+08	1.48225e+08	1.44121e+08	1.60571e+08	1.49115e+08	1.94811e+08	1.7134e+08	1.31863e+08	1.78634e+08	1.598e+08	1.94224e+08	1.71605e+08	2.47755e+08	2.23333e+08	1.9147e+08	24	23	20	19	21	21	21	18
G3V7I0;Q9Z0V6	9	9	825.68	0.543819	1.03154	Control	Exercise	Peroxiredoxin 3 OS=Rattus norvegicus GN=Prdx3 PE=4 SV=1	1.86815e+08	1.8847e+08	2.17071e+08	2.01432e+08	1.73523e+08	1.66716e+08	1.93546e+08	1.75339e+08	2.01626e+08	1.78628e+08	2.38731e+08	1.81167e+08	1.61813e+08	1.69577e+08	1.85769e+08	2.01115e+08	1.54522e+08	2.07785e+08	1.90528e+08	1.6755e+08	1.54439e+08	1.43677e+08	1.45406e+08	1.76812e+08	1.65388e+08	1.48474e+08	2.05971e+08	1.55064e+08	1.76934e+08	1.69577e+08	2.21513e+08	2.0598e+08	1.50371e+08	9	15	10	12	15	15	12	15
Q5M9I5	4	4	394.63	0.835981	1.0398	Control	Exercise	Cytochrome b-c1 complex subunit 6, mitochondrial OS=Rattus norvegicus GN=Uqcrh PE=2 SV=1	1.84972e+08	1.28082e+08	1.86632e+08	1.71193e+08	1.42378e+08	1.46779e+08	2.92057e+08	1.84559e+08	2.56969e+08	1.16849e+08	2.05389e+08	1.95637e+08	1.23446e+08	1.60363e+08	2.11784e+08	2.25544e+08	2.11887e+08	1.41208e+08	1.63812e+08	1.42398e+08	1.2672e+08	1.26496e+08	2.19415e+08	1.86109e+08	2.10785e+08	9.71245e+07	1.77204e+08	1.6745e+08	1.34982e+08	1.60363e+08	2.52535e+08	2.31e+08	2.06195e+08	7	8	8	8	7	9	7	7
Q80W89	5	5	603.61	0.530125	1.042	Exercise	Control	NADH dehydrogenase [ubiquinone] 1 alpha subcomplex subunit 11 OS=Rattus norvegicus GN=Ndufa11 PE=2 SV=1	1.79071e+08	2.20352e+08	1.84794e+08	1.72695e+08	1.44799e+08	1.51902e+08	1.83721e+08	1.68895e+08	1.75939e+08	1.98292e+08	2.23323e+08	1.73097e+08	1.55796e+08	1.69126e+08	1.84338e+08	2.01477e+08	1.56582e+08	2.42934e+08	1.62198e+08	1.43647e+08	1.28875e+08	1.30911e+08	1.38025e+08	1.70314e+08	1.44318e+08	1.64819e+08	1.92678e+08	1.48158e+08	1.70356e+08	1.69126e+08	2.19808e+08	2.06351e+08	1.52376e+08	16	11	10	9	9	9	7	6
P21571	7	7	562.04	0.0456451	1.11647	Exercise	Control	ATP synthase-coupling factor 6, mitochondrial OS=Rattus norvegicus GN=Atp5j PE=1 SV=1	1.76241e+08	1.72857e+08	1.7474e+08	1.55216e+08	1.45552e+08	1.53086e+08	1.79564e+08	1.45849e+08	2.05473e+08	1.80044e+08	2.0515e+08	1.89952e+08	1.77766e+08	1.66684e+08	1.95505e+08	2.05432e+08	1.66985e+08	1.90572e+08	1.53374e+08	1.29108e+08	1.29545e+08	1.31932e+08	1.34901e+08	1.47074e+08	1.68544e+08	1.49651e+08	1.76998e+08	1.62584e+08	1.94378e+08	1.66684e+08	2.33123e+08	2.10401e+08	1.62499e+08	7	7	8	5	7	5	3	7
D4A5L9;D3ZS15;P10715	12	12	883.32	0.793802	1.08593	Control	Exercise	Protein LOC679794 OS=Rattus norvegicus GN=LOC690675 PE=3 SV=1	1.7231e+08	3.23218e+08	2.6749e+08	1.37754e+08	1.36628e+08	1.55455e+08	1.69603e+08	1.34962e+08	1.10156e+08	1.63121e+08	2.07448e+08	1.30254e+08	1.69748e+08	1.44994e+08	2.19686e+08	1.07105e+08	1.79339e+08	3.56342e+08	2.34782e+08	1.14583e+08	1.21602e+08	1.33973e+08	1.27418e+08	1.36095e+08	9.03579e+07	1.35585e+08	1.7898e+08	1.11487e+08	1.85611e+08	1.44994e+08	2.61957e+08	1.09695e+08	1.74521e+08	18	17	11	11	11	10	9	7
D3ZE15;D3ZJR0;F1LZC5	8	8	580.8	0.914348	1.00541	Control	Exercise	RCG38845, isoform CRA_b OS=Rattus norvegicus GN=rCG_38845 PE=4 SV=1	1.6876e+08	1.86864e+08	1.77934e+08	1.5954e+08	1.44049e+08	1.78861e+08	1.8814e+08	1.42828e+08	1.75508e+08	1.73443e+08	2.09835e+08	1.48603e+08	1.48861e+08	1.49713e+08	1.72274e+08	1.72234e+08	1.71477e+08	2.06014e+08	1.56177e+08	1.32705e+08	1.28207e+08	1.54145e+08	1.41344e+08	1.44028e+08	1.43965e+08	1.44164e+08	1.8104e+08	1.27192e+08	1.62772e+08	1.49713e+08	2.05423e+08	1.764e+08	1.66871e+08	15	12	12	12	10	13	12	12
P56571	13	13	969.7	0.725778	1.04138	Exercise	Control	ES1 protein homolog, mitochondrial OS=Rattus norvegicus PE=1 SV=2	1.65142e+08	1.43461e+08	1.35322e+08	1.43372e+08	1.58703e+08	1.53745e+08	1.67358e+08	1.89359e+08	2.03037e+08	1.16586e+08	1.53875e+08	1.70251e+08	1.55795e+08	1.43688e+08	2.14755e+08	2.14311e+08	1.78658e+08	1.58163e+08	1.18775e+08	1.19257e+08	1.41249e+08	1.32499e+08	1.25731e+08	1.9095e+08	1.66545e+08	9.69053e+07	1.32759e+08	1.45722e+08	1.70354e+08	1.43688e+08	2.56078e+08	2.19495e+08	1.73858e+08	13	11	13	13	13	10	14	14
Q9WVK7	20	20	1245.86	0.823655	1.01387	Exercise	Control	Hydroxyacyl-coenzyme A dehydrogenase, mitochondrial OS=Rattus norvegicus GN=Hadh PE=2 SV=1	1.63515e+08	1.74824e+08	1.93189e+08	1.41945e+08	1.36257e+08	1.2112e+08	1.84916e+08	1.59309e+08	1.87548e+08	1.46078e+08	1.98527e+08	1.32765e+08	1.43528e+08	1.65378e+08	1.84492e+08	1.82802e+08	1.63557e+08	1.92741e+08	1.69567e+08	1.18069e+08	1.21272e+08	1.04383e+08	1.38922e+08	1.60647e+08	1.5384e+08	1.21419e+08	1.71284e+08	1.13637e+08	1.5694e+08	1.65378e+08	2.19991e+08	1.87224e+08	1.59163e+08	19	18	13	14	11	16	16	20
Q6IMX3	16	16	1400.76	0.471784	1.06112	Control	Exercise	Acetyl-Coenzyme A dehydrogenase, short chain, isoform CRA_a OS=Rattus norvegicus GN=Acads PE=2 SV=1	1.6099e+08	1.70513e+08	2.17632e+08	1.37288e+08	1.38569e+08	1.34377e+08	1.82694e+08	1.66867e+08	1.78173e+08	1.43453e+08	1.84017e+08	1.42158e+08	1.54309e+08	1.59665e+08	1.4235e+08	1.72946e+08	1.50832e+08	1.87988e+08	1.91021e+08	1.14196e+08	1.23329e+08	1.15808e+08	1.37253e+08	1.68269e+08	1.4615e+08	1.19237e+08	1.58765e+08	1.21676e+08	1.68729e+08	1.59665e+08	1.69741e+08	1.77129e+08	1.4678e+08	18	18	16	16	16	16	19	21
G3V6P2;F1M530;Q01205	12	12	1082.29	0.752105	1.01935	Exercise	Control	Dihydrolipoamide S-succinyltransferase (E2 component of 2-oxo-glutarate complex), isoform CRA_a OS=Rattus norvegicus GN=Dlst PE=3 SV=1	1.57095e+08	1.47167e+08	1.44619e+08	1.42459e+08	1.29966e+08	1.42392e+08	2.00448e+08	1.63072e+08	1.74592e+08	1.27092e+08	1.72546e+08	1.60762e+08	1.50121e+08	1.55626e+08	1.55531e+08	1.96042e+08	1.51079e+08	1.62249e+08	1.26936e+08	1.18497e+08	1.15673e+08	1.22715e+08	1.50591e+08	1.64442e+08	1.43213e+08	1.05638e+08	1.48868e+08	1.37599e+08	1.6415e+08	1.55626e+08	1.85457e+08	2.00784e+08	1.4702e+08	17	16	16	15	14	18	16	18
P81155;D4AD77;F1LQJ3	12	11	1011.7	0.0926446	1.09466	Exercise	Control	Voltage-dependent anion-selective channel protein 2 OS=Rattus norvegicus GN=Vdac2 PE=1 SV=2	1.52424e+08	1.41609e+08	1.50066e+08	1.37922e+08	1.28671e+08	1.30496e+08	1.66789e+08	1.39357e+08	1.69375e+08	1.54759e+08	1.78979e+08	1.56204e+08	1.31928e+08	1.58602e+08	1.78213e+08	1.65424e+08	1.50383e+08	1.56122e+08	1.31717e+08	1.14723e+08	1.1452e+08	1.12463e+08	1.25304e+08	1.40528e+08	1.38934e+08	1.28635e+08	1.54419e+08	1.33698e+08	1.44257e+08	1.58602e+08	2.12504e+08	1.69425e+08	1.46343e+08	11	12	9	10	13	14	13	12
P12075	7	7	391.75	0.996729	1.00658	Exercise	Control	Cytochrome c oxidase subunit 5B, mitochondrial OS=Rattus norvegicus GN=Cox5b PE=1 SV=2	1.50527e+08	1.40307e+08	1.49384e+08	1.37307e+08	1.46743e+08	1.41557e+08	1.56415e+08	1.41299e+08	1.87251e+08	1.22821e+08	2.0139e+08	1.71531e+08	1.38004e+08	1.37196e+08	1.53704e+08	1.45599e+08	1.37918e+08	1.54686e+08	1.31118e+08	1.14212e+08	1.30605e+08	1.21995e+08	1.17511e+08	1.42486e+08	1.53597e+08	1.02088e+08	1.73754e+08	1.46817e+08	1.50901e+08	1.37196e+08	1.83279e+08	1.49121e+08	1.34213e+08	10	9	8	7	6	9	7	7
Q60587	24	24	1541.94	0.462541	1.06977	Exercise	Control	Trifunctional enzyme subunit beta, mitochondrial OS=Rattus norvegicus GN=Hadhb PE=1 SV=1	1.48522e+08	1.25195e+08	1.50846e+08	1.14009e+08	1.24045e+08	1.12657e+08	1.5157e+08	1.5756e+08	2.12244e+08	1.04882e+08	1.70747e+08	1.46714e+08	1.38011e+08	1.48467e+08	1.74097e+08	1.89306e+08	1.56007e+08	1.38025e+08	1.32401e+08	9.48326e+07	1.10403e+08	9.70891e+07	1.1387e+08	1.58884e+08	1.74097e+08	8.71771e+07	1.47316e+08	1.25576e+08	1.50908e+08	1.48467e+08	2.07596e+08	1.93885e+08	1.51816e+08	17	17	18	19	18	19	23	23
F1LM47	20	20	1266.38	0.76349	1.01493	Control	Exercise	Protein Sucla2 OS=Rattus norvegicus GN=Sucla2 PE=3 SV=1	1.45609e+08	1.55941e+08	1.68921e+08	1.35585e+08	1.3352e+08	1.29775e+08	1.60907e+08	1.39101e+08	1.49752e+08	1.29434e+08	1.67648e+08	1.36265e+08	1.36621e+08	1.33545e+08	1.60167e+08	1.51716e+08	1.40846e+08	1.71922e+08	1.48266e+08	1.12779e+08	1.18836e+08	1.11842e+08	1.20886e+08	1.40269e+08	1.22837e+08	1.07585e+08	1.44642e+08	1.16632e+08	1.49388e+08	1.33545e+08	1.90986e+08	1.55386e+08	1.37062e+08	16	21	13	15	16	11	14	16
[truncated: 329 more rows]
[truncated: 9 more columns]

## Sheet: =>3 Quant p<0.05
Accession	Peptide count	Peptides used for quantitation	Confidence score	Anova (p)	Max fold change	Highest mean condition	Lowest mean condition	Description	C1_mito	C2_mito_140925053842	C3_mito	C4_mito	C5_mito	C6_mito	C7_mito	C8_mito	E1_mito	E2_mito	E3_mito	E5_mito	E6_mito	E7_mito	E9_mito	E10_mito	C1_mito	C2_mito_140925053842	C3_mito	C4_mito	C5_mito	C6_mito	C7_mito	C8_mito	E1_mito	E2_mito	E3_mito	E5_mito	E6_mito	E7_mito	E9_mito	E10_mito	C1_mito	C2_mito_140925053842	C3_mito	C4_mito	C5_mito	C6_mito	C7_mito	C8_mito	E1_mito
[truncated: 25 more rows]
[truncated: 8 more columns]

[truncated: 1 more sheets: Publication table]
